# Supplementary material for: Shared genetic architecture across fibrotic diseases
Source: Research Square preprint supplement (doi:10.21203/rs.3.rs-8156241/v1), 2025-12-30
Supplement: Supplementary file 2 [file de8d158734a0953165143e02.xlsx]

## Sheet: Overview
	Supplementary table overview
	Supplementary Table 1. Overview of included studies
	Supplementary Table 2. Top hits identified through meta-analysis of fibrotic traits GWAS as well as previously published
	Supplementary Table 3. Number of known and novel top hits across fibrotic traits
	Supplementary Table 4. Fibrotic trait heritability and genomic inflation
	Supplementary Table 5. Colocalization analyses for fibrotic traits
	Supplementary Table 6. Variant consequence across top hits
	Supplementary Table 7. Variant consequence overview
	Supplementary Table 8. Gene prioritization
	Supplementary Table 9. Colocalization (eQTL)
	Supplementary Table 10. Coding variants
	Supplementary Table 11. Genetic correlation by LDSC
	Supplementary Table 12. Pathway enrichment
	Supplementary Table 13. Exonic consequence

## Sheet: S1 - Studies
	Supplementary Table 1. Overview of included studies
	Trait	Biobank(s)	Cases	Controls	Case fraction	PMID/GWAS catalogue/URL	Phenotype definitions	Previously published	Included in GWAS /discovery/coloc	Platform	Statistical analysis details		Fibrotic disease criteria
											Statistical model	Adjutment	Prior evidence (examples)	Diagnostic code	Estimated prevalence in general population	Prevalence source
	Trigger finger	CHB-OH/DBDS	5498	328651	0.0164537	PMID: 33169150 and PMID: 36194120	ICD-10: M653	-	Yes	Illumina Global Screening Array	Logistic	Age, sex, PC´s	https://advancesinrheumatology.biomedcentral.com/articles/10.1186/s42358-024-00379-7	See "Phenotype defintions" column	0.03	https://pmc.ncbi.nlm.nih.gov/articles/PMC8283119/
	Trigger finger	UK Biobank	3968	432327	0.00909476	PMID: 30305743	ICD-10: M653	-	Yes		Logistic	Age, sex, PC´s	https://advancesinrheumatology.biomedcentral.com/articles/10.1186/s42358-024-00379-7	See "Phenotype defintions" column	0.03	https://pmc.ncbi.nlm.nih.gov/articles/PMC8283119/
	Trigger finger	FinnGen	6104	357549	0.0167852	https://r12.finngen.fi/pheno/M13_TRIGGERFINGER	ICD-10: M653	-	Yes	ThermoFisher Axiom custom chip array (v2)	Logistic	Sex, age, 10 PCs, Finngen chip version 1 or 2 , and legacy genotyping batch	https://advancesinrheumatology.biomedcentral.com/articles/10.1186/s42358-024-00379-7	See "Phenotype defintions" column	0.03	https://pmc.ncbi.nlm.nih.gov/articles/PMC8283119/
	Carpal tunnel syndrome	CHB-OH/DBDS, FinnGen, UK Biobank, deCODE	48843	1190837	0.0393997	PMID: 35332129	ICD-10: G560, ICD-9:3540, NCSP: ACC51	Yes (Skuladottir et al)	Yes	See individual study	Logistic	Covariates included: sex, age, PC´s, whether the individual had been chip-typed and/or sequenced, and genotyping batch (see publication for more specifications)	https://www.nature.com/articles/s41572-024-00521-1	See "Phenotype defintions" column	3-6%	https://www.researchgate.net/publication/12888649_Prevalence_of_carpal_tunnel_syndrome_in_a_general_population
	Cirrhosis	CHB/DBDS, deCODE, GHS, AllofUS, Estionian Biobank, Intermountain, UKB, FinnGen, German cohort	15225	1564786	0.00963601	PMID: 38632349	ICD-10: K70.2, K70.3, K70.4, K71.7, K72.1, K74.0, K74.1, K74.2, K74.6, K76.6, I85, ICD-9: 571.2, 571.5	Yes (Ghouse et al)	Yes	See individual study	Logistic	Age, sex, PC´s	https://www.mdpi.com/2227-9059/12/10/2229	See "Phenotype defintions" column	0.5%	https://www.nature.com/articles/s41575-023-00759-2
	Cirrhosis	MVP	30744	401215	0.0711734	https://ncbiinsights.ncbi.nlm.nih.gov/2024/07/22/million-veteran-program-dbgap/	Phecode ID: 571	-	Yes	Affymetrix Axiom Biobank Array	Logistic	Age, sex, PC´s	https://www.mdpi.com/2227-9059/12/10/2229	See "Phenotype defintions" column	0.5%	https://www.nature.com/articles/s41575-023-00759-2
	Idiopathic pulmonary fibrosis	CHB-OH/DBDS	1446	332704	0.0043274	PMID: 33169150 and PMID: 36194120	ICD-10: J84.1, J84.10, J84.112, J84.17, J841A, J841B, J841C, J841X	-	Yes	Illumina Global Screening Array	Logistic	Age, sex, PC´s	https://www.pnas.org/doi/10.1073/pnas.1621375114	See "Phenotype defintions" column	The adjusted prevalence estimates ranged from 0.57 to 4.51 in Asia–Pacific countries, 0.33 to 2.51 in Europe, and 2.40 to 2.98 in North America per 10,000	https://respiratory-research.biomedcentral.com/articles/10.1186/s12931-021-01791-z
	Idiopathic pulmonary fibrosis	BioVU, CCPM, ESTBB, HUNT, MGB, MGI, UCLA, UKBB, FinnGen	6743	1056693	0.00634077	PMID: 36777997	ICD-10: J841, Phecode ID: 502	Yes (Partanen et al)	Yes	See individual study	Logistic	Age, sex, PC´s principal components, and batch	https://www.pnas.org/doi/10.1073/pnas.1621375114	See "Phenotype defintions" column	The adjusted prevalence estimates ranged from 0.57 to 4.51 in Asia–Pacific countries, 0.33 to 2.51 in Europe, and 2.40 to 2.98 in North America per 10,000	https://respiratory-research.biomedcentral.com/articles/10.1186/s12931-021-01791-z
	Idiopathic pulmonary fibrosis	MVP	5815	438251	0.0130949	https://ncbiinsights.ncbi.nlm.nih.gov/2024/07/22/million-veteran-program-dbgap/	Phecode ID: 502	-	Yes	Affymetrix Axiom Biobank Array	Logistic	Age, sex, PC´s (see publication for more specifications)	https://www.pnas.org/doi/10.1073/pnas.1621375114	See "Phenotype defintions" column	The adjusted prevalence estimates ranged from 0.57 to 4.51 in Asia–Pacific countries, 0.33 to 2.51 in Europe, and 2.40 to 2.98 in North America per 10,000	https://respiratory-research.biomedcentral.com/articles/10.1186/s12931-021-01791-z
	Dupuytren's disease	CHB-OH/DBDS	6246	327903	0.0186923	PMID: 33169150 and PMID: 36194120	ICD-10: M720	-	Yes	Illumina Global Screening Array	Logistic	Age, sex, PC´s	https://www.sciencedirect.com/science/article/pii/S0022202X21014536	See "Phenotype defintions" column	0.08	https://pmc.ncbi.nlm.nih.gov/articles/PMC7594412/
	Dupuytren's disease	FinnGen	6766	357549	0.0185718	https://r12.finngen.fi/pheno/M13_DUPUTRYEN	ICD-10: M720, ICD-9: 7286, ICD-8: 7339	-	Yes	ThermoFisher Axiom custom chip array (v2)	Logistic	Sex, age, 10 PCs, Finngen chip version 1 or 2 , and legacy genotyping batch	https://www.sciencedirect.com/science/article/pii/S0022202X21014536	See "Phenotype defintions" column	0.08	https://pmc.ncbi.nlm.nih.gov/articles/PMC7594412/
	Dupuytren's disease	MVP	7037	440326	0.01573	https://ncbiinsights.ncbi.nlm.nih.gov/2024/07/22/million-veteran-program-dbgap/	Phecode ID: 728.71	-	Yes	Affymetrix Axiom Biobank Array	Logistic	Age, sex, PC´s	https://www.sciencedirect.com/science/article/pii/S0022202X21014536	See "Phenotype defintions" column	0.08	https://pmc.ncbi.nlm.nih.gov/articles/PMC7594412/
	Dupuytren's disease	Netherlands (GODDAG study, Lifelines cohort), United Kingdom (BSSH-GODD, UK Biobank), Germany (German Dupuytren Study, PopGen Study, KORA study)	11320	47023	0.194025	PMID: 38172110	Phecode ID: 728.71	Yes (Riesmeijer et al)	Yes	See individual study	Logistic	Age, sex, PC´s (see publication for more specifications)	https://www.sciencedirect.com/science/article/pii/S0022202X21014536	See "Phenotype defintions" column	0.08	https://pmc.ncbi.nlm.nih.gov/articles/PMC7594412/
	Peyronie's disease	CHB-OH/DBDS	934	159324	0.0058281	PMID: 33169150 and PMID: 36194120	ICD-10: N486	-	Yes	Illumina Global Screening Array	Logistic	Age, sex, PC´s	https://www.ncbi.nlm.nih.gov/books/NBK560628/	See "Phenotype defintions" column	0.4%–9% of men	https://onlinelibrary.wiley.com/doi/10.1111/andr.70029
	Peyronie's disease	UK Biobank	1113	199171	0.00555711	PMID: 30305743	ICD-10: N486	-	Yes		Logistic	Age, sex, PC´s	https://www.ncbi.nlm.nih.gov/books/NBK560628/	See "Phenotype defintions" column	0.4%–9% of men	https://onlinelibrary.wiley.com/doi/10.1111/andr.70029
	Peyronie's disease	MVP	2512	413591	0.00603697	https://ncbiinsights.ncbi.nlm.nih.gov/2024/07/22/million-veteran-program-dbgap/	Phecode ID: 604.3	-	Yes	Affymetrix Axiom Biobank Array	Logistic	Age, sex, PC´s	https://www.ncbi.nlm.nih.gov/books/NBK560628/	See "Phenotype defintions" column	0.4%–9% of men	https://onlinelibrary.wiley.com/doi/10.1111/andr.70029
	Phimosis	CHB-OH/DBDS	2895	157364	0.0180645	PMID: 33169150 and PMID: 36194120	ICD-10: N479D, N479C	-	Yes	Illumina Global Screening Array	Logistic	Age, sex, PC´s	https://onlinelibrary.wiley.com/doi/full/10.1111/and.13967	See "Phenotype defintions" column	phimosis in men was 3.4%	https://pubmed.ncbi.nlm.nih.gov/31655079/
	Phimosis	UK Biobank	4114	196170	0.0205408	PMID: 30305743	ICD-10: N479D, N479C	-	Yes		Logistic	Age, sex, PC´s	https://onlinelibrary.wiley.com/doi/full/10.1111/and.13967	See "Phenotype defintions" column	phimosis in men was 3.4%	https://pubmed.ncbi.nlm.nih.gov/31655079/
	Phimosis	FinnGen	9687	153573	0.0593348	https://r12.finngen.fi/pheno/N14_PHIMOSIS	ICD-10: N47, ICD-9: 605, ICD-8: 605	-	Yes	ThermoFisher Axiom custom chip array (v2)	Logistic	Sex, age, 10 PCs, Finngen chip version 1 or 2 , and legacy genotyping batch	https://onlinelibrary.wiley.com/doi/full/10.1111/and.13967	See "Phenotype defintions" column	phimosis in men was 3.4%	https://pubmed.ncbi.nlm.nih.gov/31655079/
	Phimosis	MVP	3269	412428	0.0078639	https://ncbiinsights.ncbi.nlm.nih.gov/2024/07/22/million-veteran-program-dbgap/	Phecode ID: 604.1	-	Yes	Affymetrix Axiom Biobank Array	Logistic	Age, sex, PC´s	https://onlinelibrary.wiley.com/doi/full/10.1111/and.13967	See "Phenotype defintions" column	phimosis in men was 3.4%	https://pubmed.ncbi.nlm.nih.gov/31655079/
	Skin	CHB-OH/DBDS	3672	330477	0.0109891	PMID: 33169150 and PMID: 36194120	ICD-10: DL91, DL905	-	Yes	Illumina Global Screening Array	Logistic	Age, sex, PC´s	https://www.sciencedirect.com/science/article/abs/pii/S2452318616300356	See "Phenotype defintions" column	5% to 37% in white individuals	https://www.researchgate.net/publication/7751438_Prevalence_of_hypertrophic_scar_formation_and_its_characteristics_among_the_Chinese_population
	Skin	UK Biobank	4972	431323	0.011396	PMID: 30305743	ICD-10: DL91, DL905	-	Yes		Logistic	Age, sex, PC´s	https://www.sciencedirect.com/science/article/abs/pii/S2452318616300356	See "Phenotype defintions" column	5% to 37% in white individuals	https://www.researchgate.net/publication/7751438_Prevalence_of_hypertrophic_scar_formation_and_its_characteristics_among_the_Chinese_population
	Skin	FinnGen	2068	465673	0.00442125	https://r12.finngen.fi/pheno/L12_HYPETROPHICSCAR	ICD-10: DL91, ICD-9: 7014B, ICD-8: 70130	-	Yes	ThermoFisher Axiom custom chip array (v2)	Logistic	Sex, age, 10 PCs, Finngen chip version 1 or 2 , and legacy genotyping batch	https://www.sciencedirect.com/science/article/abs/pii/S2452318616300356	See "Phenotype defintions" column	5% to 37% in white individuals	https://www.researchgate.net/publication/7751438_Prevalence_of_hypertrophic_scar_formation_and_its_characteristics_among_the_Chinese_population
	Skin	MVP	6815	428475	0.0156562	https://ncbiinsights.ncbi.nlm.nih.gov/2024/07/22/million-veteran-program-dbgap/	Phecode ID: 701.2	-	Yes	Affymetrix Axiom Biobank Array	Logistic	Age, sex, PC´s	https://www.sciencedirect.com/science/article/abs/pii/S2452318616300356	See "Phenotype defintions" column	5% to 37% in white individuals	https://www.researchgate.net/publication/7751438_Prevalence_of_hypertrophic_scar_formation_and_its_characteristics_among_the_Chinese_population
	Plantar fibromatosis	CHB-OH/DBDS	1658	332491	0.00496186	PMID: 33169150 and PMID: 36194120	ICD-10: M722	-	Yes	Illumina Global Screening Array	Logistic	Age, sex, PC´s	https://pmc.ncbi.nlm.nih.gov/articles/PMC6367723/	See "Phenotype defintions" column	0.23%	https://www.sciencedirect.com/science/article/abs/pii/S0958259212001381
	Plantar fibromatosis	UK Biobank	703	435592	0.0016113	PMID: 30305743	ICD-10: M722	-	Yes		Logistic	Age, sex, PC´s	https://pmc.ncbi.nlm.nih.gov/articles/PMC6367723/	See "Phenotype defintions" column	0.23%	https://www.sciencedirect.com/science/article/abs/pii/S0958259212001381
	Plantar fibromatosis	FinnGen	4020	357549	0.0111182	https://r12.finngen.fi/pheno/M13_PLANTARFASC	ICD-10: M722, ICD-9: 7287A	-	Yes	ThermoFisher Axiom custom chip array (v2)	Logistic	Sex, age, 10 PCs, Finngen chip version 1 or 2 , and legacy genotyping batch	https://pmc.ncbi.nlm.nih.gov/articles/PMC6367723/	See "Phenotype defintions" column	0.23%	https://www.sciencedirect.com/science/article/abs/pii/S0958259212001381
	Myocardial fibrosis	UK Biobank	43881	individuals	-	PMID: 38806679	-	Yes (Nauffal et al)	Yes	Affymetrix chip	Linear	Age at MRI, sex, MRI scanner, genotyping array and the PC´s	https://www.nature.com/articles/s41392-022-01070-3	NA	32.7% of individuals with cardiometabolic conditions developed MF	https://www.researchgate.net/publication/389140004_Global_Prevalence_of_Myocardial_Fibrosis_among_Individuals_with_Cardiometabolic_Conditions_A_Systematic_Review_and_Meta-Analysis
	Liver fibrosis	UK Biobank	43881	individuals	-	PMID: 38806679	-	Yes (Nauffal et al)	Yes	Affymetrix chip	Linear	Age at MRI, sex, MRI scanner, genotyping array and the PC´s	https://www.nature.com/articles/s41392-022-01070-3	NA	3.3% (advanced)	https://www.sciencedirect.com/science/article/abs/pii/S1542356524007900#:~:text=The%20pooled%20prevalence%20rates%20of,%E2%80%931.7%25)%20worldwide%2C%20respectively.
	Renal fibrosis	UK Biobank	43881	individuals	-	PMID: 38806679	-	Yes (Nauffal et al)	Yes	Affymetrix chip	Linear	Age at MRI, sex, MRI scanner, genotyping array and the PC´s	https://www.nature.com/articles/s41392-022-01070-3	NA	NA	NA
	Pancreas fibrosis	UK Biobank	43881	individuals	-	PMID: 38806679	-	Yes (Nauffal et al)	Yes	Affymetrix chip	Linear	Age at MRI, sex, MRI scanner, genotyping array and the PC´s	https://www.nature.com/articles/s41392-022-01070-3	NA	NA	NA
	Inflammatory bowel disease	UKB/MVP/FinnGen	27713	1516696	0.0179441	https://mvp-ukbb.finngen.fi/pheno/K11_IBD_STRICT	ICD-10: K50, K51, ICD-9: 555, 556	-	Yes		Logistic		https://www.nature.com/articles/s41575-021-00543-0	See "Phenotype defintions" column	1.6%	https://www.tandfonline.com/doi/full/10.1080/00365521.2025.2555920
	Inflammatory bowel disease	CHB/DBDS	7548	326565	0.0225912	PMID: 33169150 and PMID: 36194120	ICD-10: K50, K51	-	Yes		Logistic	Age, sex, PC´s	https://www.nature.com/articles/s41575-021-00543-0	See "Phenotype defintions" column	1.6%	https://www.tandfonline.com/doi/full/10.1080/00365521.2025.2555920
	Systemic sclerosis	Multiple cohorts from Spain, Germany, The Netherlands, USA, France, Italy, UK, Sweden, Norway and Australia/UK	9095	17584	0.340905	PMID: 31672989	1980 American College of Rheumatology classification criteria	Yes (López-Isac et al)	Yes		Logistic		https://www.nature.com/articles/s41584-022-00864-7	See "Phenotype defintions" column	17.6 per 100 000	https://pmc.ncbi.nlm.nih.gov/articles/PMC8516513/
	Systemic sclerosis	FinnGen	854	484260	0.00176041	https://r12.finngen.fi/pheno/M13_SYSTSLCE	ICD-10: M34, ICD-9: 7101	-	Yes		Logistic		https://www.nature.com/articles/s41584-022-00864-7	See "Phenotype defintions" column	17.6 per 100 001	https://pmc.ncbi.nlm.nih.gov/articles/PMC8516513/
	Systemic sclerosis	CHB/DBDS	392	333723	0.00117325	PMID: 33169150 and PMID: 36194120	ICD-10: M34	-	Yes		Logistic	Age, sex, PC´s	https://www.nature.com/articles/s41584-022-00864-7	See "Phenotype defintions" column	17.6 per 100 002	https://pmc.ncbi.nlm.nih.gov/articles/PMC8516513/
	Heart failure	Multiple from HERMES consortium	139533	1946349	0.066894	PMID: 40038546	-	Yes (Henry et al)	Yes		Logistic		https://www.pnas.org/doi/10.1073/pnas.1621375114	See "Phenotype defintions" column	0.017	https://academic.oup.com/cardiovascres/article/118/17/3272/6527627?login=true
	Chronic kidney disease	UKB/MVP/FinnGen	112143	1406843	0.0738275	https://mvp-ukbb.finngen.fi/pheno/N14_CHRONKIDNEYDIS	ICD-10: N18, ICD-9: 585	-	Yes		Logistic		https://www.pnas.org/doi/10.1073/pnas.1621375114	See "Phenotype defintions" column	0.1	https://pmc.ncbi.nlm.nih.gov/articles/PMC9073222/
	Chronic kidney disease	CHB/DBDS	14215	319893	0.0425461	PMID: 33169150 and PMID: 36194120	ICD-10: N18	-	Yes		Logistic	Age, sex, PC´s	https://www.pnas.org/doi/10.1073/pnas.1621375114	See "Phenotype defintions" column	0.1	https://pmc.ncbi.nlm.nih.gov/articles/PMC9073222/

## Sheet: S2 - Top hits
	Supplementary Table 2. Top hits identified through meta-analysis of fibrotic traits GWAS as well as previously published
	CHR	BP	SNP	A1	A0	FREQA1	BETA	SE	P	Trait	mlogP	Known_locus	PUBMEDID	SNP unique/duplicated
	1	1327586	rs307349	T	C	0.881	-0.099	0.014	2.93e-13	Inflammatory bowel disease	12.5334	Known	26974007	Unique
	1	2455297	rs35608674	A	G	0.102	0.066	0.011	5.07e-09	Cirrhosis	8.29499	Known	34033851	Unique
	1	8108857	rs4325151	A	T	0.748	0.078	0.01	2.12e-15	Inflammatory bowel disease	14.6728	Known	26974007	Unique
	1	10640391	rs2128416	T	C	0.864	-0.041	0.007	1.42e-08	Chronic kidney disease	7.84894	Known	37919891	Unique
	1	10730479	rs284278	A	G	0.368	0.028	0.005	1.65e-08	Heart failure	7.78199	Known	40038546	Unique
	1	11162336	rs7553827	T	C	0.743	-0.098	0.012	3.77e-16	Dupuytren's disease	15.4239	Known	38172110	Unique
	1	15586228	rs10157011	A	G	0.44	-0.229	0.008	3.17e-181	Renal fibrosis	180.5	Known	38806679	Unique
	1	15986677	rs3961710	C	T	0.687	0.036	0.005	1.08e-11	Heart failure	10.9686	Known	40038546	Unique
	1	16428690	rs2086382165	A	ATCAC	0.038	-0.151	0.023	5.79e-11	Renal fibrosis	10.2373	Known	38806679	Unique
	1	19845021	rs10737481	T	G	0.487	-0.117	0.008	2.76e-48	Inflammatory bowel disease	47.5599	Known	33686288	Unique
	1	22133261	rs4655025	A	G	0.437	-0.051	0.007	3.84e-13	Carpal tunnel syndrome	12.4157	Known	35332129	Unique
	1	22371954	rs7524102	A	G	0.894	0.112	0.012	2.95e-22	Inflammatory bowel disease	21.5303	Known	26974007	Unique
	1	22384384	rs34963268	C	G	0.169	0.194	0.014	3.33e-44	Dupuytren's disease	43.4772	Known	37315093	Unique
	1	41972525	rs591088	C	T	0.451	0.029	0.005	1.75e-09	Heart failure	8.75746	Known	40038546	Unique
	1	50642739	rs35004807	TGTAA	T	0.344	-0.044	0.008	2.04e-08	Pancreas fibrosis	7.69043	Known	38806679	Unique
	1	50883991	rs149288352	A	G	0.022	0.096	0.016	2.78e-09	Heart failure	8.55642	Known	40038546	Unique
	1	55257768	rs2802861	T	C	0.845	0.046	0.006	8.72e-13	Chronic kidney disease	12.0594	Known	29703844	Unique
	1	56499992	rs9970807	C	T	0.91	0.049	0.008	2.61e-09	Heart failure	8.58319	Known	40038546	Unique
	1	61421219	rs2474370	C	T	0.316	0.031	0.005	1.47e-09	Heart failure	8.83121	Known	40038546	Unique
	1	67242007	rs11581607	A	G	0.049	-0.403	0.02	2.28e-91	Inflammatory bowel disease	90.6421	Known	33686288	Unique
	1	67348757	rs3790566	T	C	0.208	0.162	0.022	1.60e-13	Systemic sclerosis	12.7959	Known	29293537	Unique
	1	77984833	rs34517439	A	C	0.12	0.043	0.007	8.74e-09	Heart failure	8.05829	Known	40038546	Unique
	1	102914362	rs3753841	G	A	0.406	-0.043	0.007	2.03e-09	Carpal tunnel syndrome	8.6925	Known	35332129	Unique
	1	109274968	rs12740374	G	T	0.779	0.034	0.006	9.92e-10	Heart failure	9.00353	Known	40038546	Unique
	1	118553782	rs2360019	A	G	0.731	-0.078	0.014	3.01e-08	Trigger finger	7.52201	Novel		Unique
	1	119982857	rs116062645	T	G	0.036	0.206	0.027	7.96e-15	Inflammatory bowel disease	14.099	Known	26192919	Unique
	1	149934520	rs11205303	C	T	0.408	-0.068	0.007	7.00e-21	Carpal tunnel syndrome	20.1549	Known	35332129	Unique
	1	149955122	rs12048493	A	C	0.61	-0.149	0.022	1.76e-11	Peyronie's disease	10.7542	Novel		Unique
	1	149969301	rs12023748	A	G	0.756	-0.088	0.015	1.29e-09	Trigger finger	8.89076	Novel		Unique
	1	150094433	rs11577346	A	T	0.85	0.094	0.014	9.26e-11	Dupuytren's disease	10.0333	Novel	37315093	Unique
	1	150716783	rs372839783	G	GA	0.873	0.172	0.024	1.86e-12	Idiopathic pulmonary fibrosis	11.7317	Novel		Unique
	1	151820698	rs11204894	T	G	0.267	-0.085	0.009	3.30e-19	Inflammatory bowel disease	18.4815	Known	26974007	Unique
	1	155060832	rs11589479	A	G	0.141	-0.068	0.011	1.62e-09	Inflammatory bowel disease	8.79048	Known	26974007	Unique
	1	155179017	rs11264341	T	C	0.434	0.085	0.013	2.01e-11	Idiopathic pulmonary fibrosis	10.6968	Novel		Unique
	1	155320440	rs41314549	C	T	0.019	0.147	0.023	7.76e-11	Carpal tunnel syndrome	10.1101	Known	35332129	Unique
	1	156234862	rs2842873	T	C	0.342	-0.032	0.005	2.98e-11	Chronic kidney disease	10.5256	Known	39024449	Unique
	1	159830120	rs34687326	A	G	0.12	-0.076	0.013	2.81e-09	Inflammatory bowel disease	8.55191	Known	25557950	Unique
	1	161509955	rs1801274	A	G	0.499	0.112	0.008	2.02e-45	Inflammatory bowel disease	44.6955	Known	26974007	Unique
	1	162651183	rs61810412	A	T	0.078	-0.22	0.02	1.95e-27	Dupuytren's disease	26.7104	Known	37315093	Unique
	1	163629505	rs4656402	C	G	0.572	0.028	0.005	1.58e-09	Chronic kidney disease	8.80024	Known	39256582	Unique
	1	167451188	rs2056626	T	G	0.63	0.153	0.025	1.86e-09	Systemic sclerosis	8.72979	Known	21750679	Unique
	1	168840198	rs114687274	G	T	0.024	0.093	0.016	1.56e-08	Heart failure	7.80604	Known	40038546	Unique
	1	169681606	rs7543304	T	C	0.433	-0.054	0.008	1.11e-10	Inflammatory bowel disease	9.95664	Known	26192919	Unique
	1	170432945	rs1576975	A	T	0.223	0.07	0.012	1.64e-08	Dupuytren's disease	7.78648	Novel	37315093	Unique
	1	173362623	rs7528321	T	C	0.252	-0.136	0.021	2.12e-10	Systemic sclerosis	9.67428	Known	30573655	Unique
	1	180939925	rs1609829	T	C	0.347	-0.034	0.005	1.31e-10	Chronic kidney disease	9.88339	Known	31015462	Unique
	1	186763997	rs988905	T	C	0.073	0.062	0.009	1.17e-11	Chronic kidney disease	10.9314	Known	35870639	Unique
	1	186793684	rs16825915	T	C	0.975	-0.133	0.023	1.09e-08	Inflammatory bowel disease	7.96377	Known	37156999	Unique
	1	197735587	rs17641524	T	C	0.154	0.059	0.01	1.05e-08	Inflammatory bowel disease	7.97922	Known	26974007	Unique
	1	200908434	rs7554511	A	C	0.235	-0.105	0.009	1.92e-30	Inflammatory bowel disease	29.7174	Known	26974007	Unique
	1	201468704	rs35383942	T	C	0.075	0.178	0.024	1.24e-13	Skin	12.9083	Known	34594039	Unique
	1	205790067	rs1772159	A	G	0.389	-0.074	0.008	9.96e-23	Pancreas fibrosis	22.0017	Known	38806679	Unique
	1	206430185	rs2297539	A	G	0.474	0.115	0.011	2.73e-26	Dupuytren's disease	25.5635	Known	37315093	Unique
	1	206766559	rs3024505	A	G	0.161	0.16	0.011	2.60e-52	Inflammatory bowel disease	51.5847	Known	26974007	Unique
	1	213654720	rs7555143	T	G	0.4	-0.044	0.007	2.78e-09	Pancreas fibrosis	8.55548	Known	38806679	Unique
	1	214435361	rs4655345	A	G	0.605	0.058	0.011	3.96e-08	Dupuytren's disease	7.40252	Novel	37315093	Unique
	1	219927155	rs759359281	C	CA	0.054	0.127	0.017	2.43e-14	Liver fibrosis	13.6137	Known	38806679	Unique
	1	220796686	rs2642438	A	G	0.294	-0.106	0.008	1.21e-43	Cirrhosis	42.9165	Known	33310085	Unique
	1	220800832	rs12046182	T	C	0.214	0.062	0.009	2.11e-11	Liver fibrosis	10.6757	Known	38806679	Unique
	1	222077747	rs10863683	C	G	0.333	0.108	0.013	6.77e-17	Skin	16.1692	Known	20711176	Unique
	1	222095156	rs7549980	A	T	0.28	0.094	0.013	5.15e-14	Dupuytren's disease	13.2879	Novel	37315093	Unique
	1	226754854	rs835672	T	C	0.24	0.059	0.009	1.95e-10	Inflammatory bowel disease	9.71041	Known	37156999	Unique
	1	227780237	rs10916207	G	A	0.501	-0.05	0.007	6.39e-13	Carpal tunnel syndrome	12.1945	Known	35332129	Unique
	1	234599210	rs10910476	T	C	0.519	0.051	0.008	3.72e-10	Inflammatory bowel disease	9.42992	Known	37156999	Unique
	1	243336442	rs2783968	C	G	0.415	0.029	0.005	4.36e-10	Chronic kidney disease	9.36081	Known	29124443	Unique
	2	652565	rs7570993	A	G	0.83	0.048	0.007	7.12e-13	Heart failure	12.1473	Known	40038546	Unique
	2	11899552	rs17605696	T	C	0.676	-0.103	0.011	1.25e-20	Dupuytren's disease	19.9017	Known	37315093	Unique
	2	15642347	rs807624	T	G	0.305	-0.026	0.005	4.40e-08	Chronic kidney disease	7.35625	Known	31451708	Unique
	2	25265950	rs7578575	A	T	0.282	0.062	0.009	1.68e-12	Inflammatory bowel disease	11.7742	Known	26974007	Unique
	2	27529596	rs11127048	A	G	0.597	-0.069	0.007	5.64e-22	Cirrhosis	21.2487	Known	38632349	Unique
	2	28195164	rs6712705	T	C	0.623	-0.083	0.011	7.88e-14	Dupuytren's disease	13.1034	Known	38172110	Unique
	2	28404762	rs11127150	T	C	0.425	-0.063	0.008	7.06e-15	Inflammatory bowel disease	14.1513	Known	26974007	Unique
	2	33188573	rs6712473	G	T	0.468	0.049	0.007	1.58e-12	Carpal tunnel syndrome	11.8013	Known	35332129	Unique
	2	33203281	rs996102	A	G	0.537	-0.072	0.013	7.93e-09	Trigger finger	8.10045	Novel		Unique
	2	36922355	rs11124554	C	T	0.481	-0.035	0.005	4.14e-13	Heart failure	12.3832	Known	40038546	Unique
	2	43621796	rs55921927	A	C	0.896	-0.07	0.012	1.56e-09	Inflammatory bowel disease	8.80799	Known	26974007	Unique
	2	43854488	rs4076834	G	T	0.067	-0.056	0.01	1.01e-08	Heart failure	7.99525	Known	40038546	Unique
	2	55869757	rs3791679	G	A	0.238	0.074	0.008	4.13e-19	Carpal tunnel syndrome	18.384	Known	35332129	Unique
	2	58723228	rs17615494	T	G	0.258	0.032	0.005	5.52e-10	Chronic kidney disease	9.25767	Novel		Unique
	2	59934022	rs17328524	C	T	0.433	-0.044	0.007	3.88e-10	Carpal tunnel syndrome	9.41117	Known	35332129	Unique
	2	60410521	rs10445937	A	G	0.387	-0.026	0.005	3.22e-08	Chronic kidney disease	7.49214	Known	35710981	Unique
	2	60977506	rs7608697	A	C	0.622	-0.093	0.008	1.58e-30	Inflammatory bowel disease	29.8002	Known	26974007	Unique
	2	61572440	rs113774595	T	G	0.298	-0.042	0.008	3.49e-08	Cirrhosis	7.45668	Novel		Unique
	2	64678048	rs34532102	T	C	0.198	0.043	0.006	4.13e-13	Chronic kidney disease	12.3842	Known	37277652	Unique
	2	65441066	rs67794735	C	G	0.701	0.075	0.011	3.76e-11	Dupuytren's disease	10.4249	Novel	37315093	Unique
	2	65452578	rs1437461	T	C	0.3	0.054	0.009	3.04e-10	Inflammatory bowel disease	9.51727	Known	26974007	Unique
	2	69061076	rs56885830	A	G	0.946	-0.259	0.025	6.23e-25	Dupuytren's disease	24.2054	Known	37315093	Unique
	2	73610624	rs6546856	T	C	0.762	0.035	0.005	2.79e-11	Chronic kidney disease	10.5544	Known	21546767	Unique
	2	102368211	rs1882348	A	T	0.401	-0.077	0.008	1.19e-20	Inflammatory bowel disease	19.9259	Known	26974007	Unique
	2	111049726	rs3827538	T	C	0.225	-0.07	0.013	3.78e-08	Phimosis	7.42251	Novel		Unique
	2	111074216	rs58055674	T	C	0.844	0.061	0.011	2.99e-08	Inflammatory bowel disease	7.52462	Known	37156999	Unique
	2	119749849	rs10174596	T	C	0.721	0.107	0.012	1.15e-18	Dupuytren's disease	17.9389	Known	37315093	Unique
	2	121231495	rs1078441	A	C	0.489	-0.03	0.005	2.38e-10	Chronic kidney disease	9.62397	Known	30809046	Unique
	2	144916508	rs2579022	T	C	0.329	0.074	0.013	1.86e-08	Trigger finger	7.73166	Novel		Unique
	2	160487551	rs7423572	C	G	0.781	-0.054	0.01	1.01e-08	Inflammatory bowel disease	7.99353	Novel		Unique
	2	162107791	rs75166367	A	G	0.072	0.076	0.01	6.36e-14	Chronic kidney disease	13.1969	Known	39024449	Unique
	2	162254026	rs2111485	A	G	0.408	0.059	0.008	3.15e-13	Inflammatory bowel disease	12.5018	Known	26974007	Unique
	2	164651879	rs10184004	T	C	0.398	-0.04	0.007	3.53e-08	Cirrhosis	7.45247	Known	38632349	Unique
	2	169155689	rs16856530	T	C	0.24	-0.063	0.009	1.14e-11	Renal fibrosis	10.9444	Known	38806679	Unique
	2	171052679	rs10490606	G	A	0.088	0.073	0.013	1.84e-08	Pancreas fibrosis	7.73441	Known	38806679	Unique
	2	176004276	rs73978133	T	C	0.204	-0.056	0.009	1.49e-10	Carpal tunnel syndrome	9.82681	Known	35332129	Unique
	2	181470026	rs13029501	T	G	0.574	-0.056	0.008	4.72e-12	Inflammatory bowel disease	11.3259	Known	33608531	Unique
	2	191038032	rs3821236	A	G	0.204	0.247	0.023	3.16e-26	Systemic sclerosis	25.501	Known	29293537	Unique
	2	197364216	rs788015	A	G	0.218	-0.076	0.013	1.81e-09	Phimosis	8.74328	Known	38915890	Unique
	2	198933929	rs11695021	T	C	0.572	-0.065	0.008	1.34e-15	Inflammatory bowel disease	14.8735	Known	26974007	Unique
	2	200306928	rs74853338	C	T	0.574	-0.034	0.005	2.86e-11	Heart failure	10.5439	Known	40038546	Unique
	2	202620013	rs1971740	A	G	0.286	0.047	0.009	4.60e-08	Inflammatory bowel disease	7.33724	Novel		Unique
	2	203721353	rs3116488	C	G	0.798	-0.057	0.009	1.13e-09	Inflammatory bowel disease	8.94731	Known	26974007	Unique
	2	210675783	rs1047891	A	C	0.32	0.041	0.005	6.15e-14	Chronic kidney disease	13.2111	Known	29545352	Unique
	2	217255937	rs12622529	A	G	0.186	-0.139	0.017	2.49e-16	Trigger finger	15.6043	Known	36043126	Unique
	2	217281820	rs12694411	T	A	0.243	-0.081	0.008	3.30e-24	Carpal tunnel syndrome	23.4815	Known	35332129	Unique
	2	218104198	rs7580751	T	C	0.579	-0.061	0.008	6.51e-14	Inflammatory bowel disease	13.1866	Known	26974007	Unique
	2	221786480	rs148475840	C	G	0.002	1.577	0.274	9.11e-09	Peyronie's disease	8.04039	Novel		Unique
	2	226230042	rs2203452	A	G	0.361	-0.034	0.005	1.50e-12	Chronic kidney disease	11.8248	Known	39024449	Unique
	2	227805671	rs7574953	A	G	0.733	0.068	0.009	9.66e-14	Inflammatory bowel disease	13.0149	Known	26974007	Unique
	2	230268450	rs7582543	A	G	0.607	-0.049	0.008	1.56e-09	Inflammatory bowel disease	8.80604	Known	26974007	Unique
	2	233246005	rs2119505	A	G	0.46	0.052	0.008	7.91e-11	Inflammatory bowel disease	10.1018	Known	33686288	Unique
	2	233702448	rs17863787	T	G	0.681	-0.049	0.008	3.77e-10	Cirrhosis	9.42389	Novel		Unique
	2	236679892	rs2720102	A	G	0.797	-0.056	0.01	3.44e-08	Inflammatory bowel disease	7.46306	Novel		Unique
	2	240628909	rs34236350	T	C	0.251	0.133	0.01	5.07e-44	Inflammatory bowel disease	43.2952	Known	26974007	Unique
	2	240967008	rs12471544	A	G	0.624	0.147	0.024	5.59e-10	Peyronie's disease	9.25243	Novel		Unique
	2	241097382	rs2286323	G	A	0.087	-0.067	0.012	1.40e-08	Carpal tunnel syndrome	7.85387	Known	35332129	Unique
	2	241816853	rs2293764	T	C	0.109	0.08	0.012	4.78e-11	Inflammatory bowel disease	10.3204	Known	26974007	Unique
	3	12800305	rs7650482	A	G	0.363	-0.033	0.005	1.07e-10	Heart failure	9.96981	Known	40038546	Unique
	3	26330633	rs79293030	T	C	0.981	-0.543	0.07	6.77e-15	Dupuytren's disease	14.1692	Known	38172110	Unique
	3	44805230	rs80059929	A	T	0.044	0.165	0.03	2.93e-08	Idiopathic pulmonary fibrosis	7.53343	Known	35688625	Unique
	3	45573963	rs71325072	T	C	0.965	-0.176	0.029	2.57e-09	Dupuytren's disease	8.58939	Known	38172110	Unique
	3	49641218	rs4283605	A	G	0.616	-0.123	0.009	8.29e-48	Inflammatory bowel disease	47.0816	Known	26974007	Unique
	3	49684099	rs3197999	A	G	0.296	-0.029	0.005	7.68e-09	Heart failure	8.1147	Known	40038546	Unique
	3	52791512	rs1075653	C	T	0.376	0.042	0.007	3.63e-09	Carpal tunnel syndrome	8.44009	Known	35332129	Unique
	3	58145788	rs7355798	T	C	0.256	0.138	0.021	8.87e-11	Systemic sclerosis	10.0519	Known	24387989	Unique
	3	61658693	rs6771875	A	G	0.184	-0.135	0.014	4.19e-21	Dupuytren's disease	20.378	Known	37315093	Unique
	3	71545686	rs11719972	T	C	0.623	0.027	0.005	2.67e-08	Chronic kidney disease	7.57365	Known	35870639	Unique
	3	86695486	rs9858679	T	C	0.405	-0.07	0.011	2.58e-10	Dupuytren's disease	9.58788	Novel	37315093	Unique
	3	119397303	rs9884090	A	G	0.168	-0.169	0.025	3.63e-11	Systemic sclerosis	10.4402	Known	31672989	Unique
	3	124763647	rs150512726	T	TTTGTTGAAC	0.124	-0.087	0.011	2.23e-15	Carpal tunnel syndrome	14.6517	Known	35332129	Unique
	3	129493428	rs3774769	A	G	0.061	-0.167	0.025	4.84e-11	Dupuytren's disease	10.315	Novel	37315093	Unique
	3	136015323	rs13097267	A	T	0.27	-0.041	0.008	3.21e-08	Myocardial fibrosis	7.49365	Known	38806679	Unique
	3	136476945	rs1394094	A	T	0.332	-0.052	0.008	6.62e-12	Carpal tunnel syndrome	11.1791	Known	35332129	Unique
	3	141402972	rs2871960	C	A	0.482	-0.053	0.007	3.33e-14	Carpal tunnel syndrome	13.4776	Known	35332129	Unique
	3	152318513	rs1827182	T	G	0.815	-0.19	0.032	4.52e-09	Systemic sclerosis	8.34505	Novel		Unique
	3	154204164	rs377565	A	G	0.173	-0.041	0.007	4.14e-10	Chronic kidney disease	9.38289	Known	35743677	Unique
	3	160015740	rs589446	T	G	0.42	-0.132	0.021	1.77e-10	Systemic sclerosis	9.75203	Known	24387989	Unique
	3	160453304	rs56394279	T	C	0.599	-0.028	0.005	6.09e-09	Chronic kidney disease	8.2151	Novel		Unique
	3	169774228	rs34847803	T	TA	0.752	-0.156	0.016	6.16e-23	Idiopathic pulmonary fibrosis	22.2106	Known	35688625	Unique
	3	183481729	rs7630096	T	C	0.419	0.101	0.011	9.04e-21	Dupuytren's disease	20.044	Known	37315093	Unique
	3	186716033	rs10440056	T	C	0.321	0.03	0.005	2.73e-10	Chronic kidney disease	9.56368	Known	35870639	Unique
	3	188683070	rs6762648	A	T	0.234	-0.075	0.01	3.25e-14	Inflammatory bowel disease	13.4888	Known	28067908	Unique
	3	188767039	rs56098053	A	G	0.626	-0.098	0.011	7.49e-20	Dupuytren's disease	19.1255	Known	38172110	Unique
	3	194092961	rs7642977	T	C	0.306	0.028	0.005	1.57e-08	Chronic kidney disease	7.80327	Known	39256582	Unique
	3	196688484	rs75391517	C	G	0.228	0.057	0.01	2.93e-09	Inflammatory bowel disease	8.53343	Novel		Unique
	3	197814267	rs558992709	T	G	0.992	-0.307	0.055	3.02e-08	Cirrhosis	7.52028	Novel		Unique
	4	971991	rs11724804	A	G	0.474	0.132	0.02	8.24e-11	Systemic sclerosis	10.0843	Known	29293537	Unique
	4	7913825	rs55844411	T	C	0.601	0.102	0.011	1.30e-21	Dupuytren's disease	20.8864	Known	38172110	Unique
	4	8327339	rs1474313	G	A	0.264	0.067	0.008	3.64e-18	Carpal tunnel syndrome	17.4389	Known	35332129	Unique
	4	13221803	rs66525731	T	C	0.127	0.097	0.011	8.60e-20	Carpal tunnel syndrome	19.0655	Known	35332129	Unique
	4	26032408	rs9790578	T	C	0.546	-0.064	0.011	1.72e-09	Dupuytren's disease	8.76397	Novel	37315093	Unique
	4	38358992	rs6831206	C	G	0.909	-0.172	0.027	3.07e-10	Dupuytren's disease	9.5123	Novel	37315093	Unique
	4	39445984	rs71643295	CAGGGTTT	C	0.312	0.045	0.008	1.84e-08	Pancreas fibrosis	7.73518	Known	38806679	Unique
	4	53617981	rs17083205	A	G	0.105	-0.115	0.019	6.55e-10	Dupuytren's disease	9.18363	Novel	37315093	Unique
	4	55076156	rs7659911	C	G	0.153	-0.227	0.016	8.24e-46	Dupuytren's disease	45.0842	Known	37315093	Unique
	4	80253438	rs13125101	A	G	0.344	-0.056	0.005	7.70e-25	Chronic kidney disease	24.1133	Known	39024449	Unique
	4	87296626	rs13139418	C	G	0.276	-0.102	0.008	8.87e-39	Cirrhosis	38.052	Known	32853455	Unique
	4	88958045	rs1585258	T	G	0.811	-0.115	0.016	6.25e-13	Idiopathic pulmonary fibrosis	12.2045	Known	35688625	Unique
	4	89023238	rs10006744	A	T	0.472	-0.045	0.008	1.71e-08	Inflammatory bowel disease	7.76751	Known	38102678	Unique
	4	94480794	rs28502775	A	G	0.782	-0.032	0.006	3.03e-08	Heart failure	7.51884	Known	40038546	Unique
	4	99526964	rs7689584	T	G	0.747	0.076	0.009	1.79e-18	Cirrhosis	17.7469	Known	38632349	Unique
	4	101082973	rs77161209	C	G	0.019	0.172	0.029	4.50e-09	Renal fibrosis	8.3471	Known	38806679	Unique
	4	101099353	rs115064203	A	T	0.019	0.236	0.027	4.75e-18	Liver fibrosis	17.3234	Known	38806679	Unique
	4	101759884	rs201081507	G	A	0.057	0.304	0.017	1.28e-68	Liver fibrosis	67.8917	Known	38806679	Duplicate
	4	101759884	rs201081507	G	A	0.057	0.282	0.019	5.80e-51	Renal fibrosis	50.2365	Known	38806679	Duplicate
	4	102267552	rs13107325	T	C	0.07	0.474	0.014	3.60e-240	Liver fibrosis	239.444	Known	38806679	Duplicate
	4	102267552	rs13107325	T	C	0.07	0.423	0.015	1.62e-162	Renal fibrosis	161.789	Known	38806679	Duplicate
	4	102267552	rs13107325	T	C	0.069	0.174	0.014	2.44e-33	Pancreas fibrosis	32.6119	Known	38806679	Duplicate
	4	102527884	rs230534	T	C	0.321	0.141	0.021	1.22e-11	Systemic sclerosis	10.9122	Known	30247649	Unique
	4	102777167	rs34406062	A	C	0.035	0.187	0.02	5.68e-21	Liver fibrosis	20.2457	Known	38806679	Unique
	4	102944814	rs4280731	T	C	0.663	0.076	0.014	3.13e-08	Dupuytren's disease	7.50446	Novel	37315093	Unique
	4	103242705	rs13120154	T	C	0.116	0.081	0.013	2.57e-10	Renal fibrosis	9.58967	Known	38806679	Unique
	4	103339278	rs67072524	T	C	0.114	0.074	0.012	1.42e-10	Liver fibrosis	9.84631	Known	38806679	Unique
	4	110763487	rs4833443	C	T	0.883	-0.079	0.008	6.62e-25	Heart failure	24.1791	Known	40038546	Unique
	4	113507558	rs55754224	T	C	0.25	0.046	0.008	1.44e-09	Myocardial fibrosis	8.84018	Known	38806679	Unique
	4	113523590	rs6816233	A	T	0.258	0.034	0.005	4.66e-10	Heart failure	9.33152	Known	40038546	Unique
	4	122195707	rs55969942	T	G	0.566	-0.073	0.008	8.25e-19	Inflammatory bowel disease	18.0836	Known	26974007	Unique
	4	143200011	rs6839312	A	T	0.29	0.042	0.005	3.24e-17	Chronic kidney disease	16.4892	Known	39024449	Unique
	4	153917282	rs997850	C	G	0.573	0.062	0.011	9.92e-09	Dupuytren's disease	8.00327	Known	37315093	Unique
	4	155679529	rs13107809	A	G	0.448	-0.051	0.008	3.76e-10	Inflammatory bowel disease	9.42516	Novel		Unique
	4	161256326	rs2120636	T	C	0.014	0.351	0.058	1.19e-09	Trigger finger	8.92445	Novel		Unique
	4	168430768	rs4692931	T	C	0.512	-0.063	0.011	5.05e-09	Dupuytren's disease	8.29671	Novel	37315093	Unique
	4	176501911	rs365843	T	C	0.37	-0.04	0.007	3.19e-09	Myocardial fibrosis	8.49684	Known	38806679	Unique
	4	185659450	rs769430224	T	TCA	0.174	-0.059	0.01	1.09e-09	Pancreas fibrosis	8.96257	Known	38806679	Unique
	5	692915	rs4990988	A	G	0.288	0.072	0.011	1.60e-11	Chronic kidney disease	10.7959	Known	32572055	Unique
	5	1282204	rs7726159	A	C	0.335	-0.149	0.014	5.56e-27	Idiopathic pulmonary fibrosis	26.2553	Known	18835860	Unique
	5	10714252	rs267984	A	T	0.685	-0.065	0.009	1.92e-14	Inflammatory bowel disease	13.7162	Known	26974007	Unique
	5	34506738	rs11747360	A	G	0.564	0.03	0.005	1.73e-10	Chronic kidney disease	9.76296	Known	31152163	Unique
	5	38788458	rs4360064	A	G	0.269	-0.167	0.025	1.97e-11	Peyronie's disease	10.7066	Novel		Unique
	5	38867630	rs395157	T	C	0.489	0.058	0.008	9.04e-13	Inflammatory bowel disease	12.0439	Known	26974007	Unique
	5	39478603	rs6884555	T	C	0.566	-0.06	0.011	2.80e-08	Dupuytren's disease	7.55238	Novel	37315093	Unique
	5	39612423	rs10461728	T	C	0.448	-0.026	0.005	1.76e-08	Chronic kidney disease	7.75548	Known	35870639	Unique
	5	40425088	rs6879489	T	G	0.422	-0.095	0.008	3.22e-31	Inflammatory bowel disease	30.4925	Known	33686288	Unique
	5	54517737	rs7706939	T	G	0.148	-0.112	0.015	1.17e-13	Dupuytren's disease	12.9337	Novel	37315093	Unique
	5	79198050	rs6453431	C	G	0.428	-0.028	0.005	3.54e-08	Chronic kidney disease	7.45051	Known	37277652	Unique
	5	81017967	rs568299	A	G	0.653	0.129	0.023	1.89e-08	Peyronie's disease	7.72377	Novel		Unique
	5	81035624	rs187338729	A	T	0.903	0.141	0.025	1.48e-08	Dupuytren's disease	7.83003	Novel	37315093	Unique
	5	83519351	rs61749613	G	A	0.045	0.108	0.018	8.47e-10	Carpal tunnel syndrome	9.07212	Known	35332129	Unique
	5	98430152	rs10043462	A	G	0.45	-0.044	0.007	2.35e-10	Carpal tunnel syndrome	9.62893	Known	35332129	Unique
	5	98447421	rs1037598	A	C	0.534	0.154	0.021	6.60e-13	Peyronie's disease	12.1805	Known	39024449	Unique
	5	109309144	rs7705558	T	C	0.425	-0.131	0.011	4.48e-33	Dupuytren's disease	32.3487	Known	37315093	Unique
	5	113013682	rs4705749	T	C	0.482	0.027	0.005	1.61e-08	Chronic kidney disease	7.79371	Novel		Unique
	5	132271607	rs55722650	T	C	0.307	0.094	0.008	1.02e-29	Inflammatory bowel disease	28.9918	Known	26974007	Unique
	5	132463934	rs3749833	T	C	0.714	-0.099	0.012	5.83e-18	Dupuytren's disease	17.2345	Known	37315093	Unique
	5	135116689	rs11948459	C	G	0.351	0.058	0.009	9.06e-12	Inflammatory bowel disease	11.0426	Known	28067908	Unique
	5	139342610	rs113408838	C	T	0.9	-0.045	0.008	2.26e-08	Heart failure	7.64647	Known	40038546	Unique
	5	143542780	rs34022217	G	T	0.187	0.034	0.006	4.78e-08	Heart failure	7.32084	Known	40038546	Unique
	5	150795397	rs73282209	A	G	0.08	0.142	0.015	2.73e-22	Inflammatory bowel disease	21.5634	Known	26974007	Unique
	5	151076171	rs3792783	A	G	0.847	-0.172	0.024	6.38e-13	Systemic sclerosis	12.1952	Known	21750679	Unique
	5	158464870	rs2946160	A	G	0.729	-0.118	0.012	1.27e-22	Dupuytren's disease	21.8969	Known	37315093	Unique
	5	159399784	rs6871626	A	C	0.31	0.086	0.008	1.78e-24	Inflammatory bowel disease	23.7486	Known	26974007	Unique
	5	169588475	rs116483731	A	G	0.01	0.612	0.065	2.68e-21	Idiopathic pulmonary fibrosis	20.5722	Known	33758299	Unique
	5	172897975	rs564349	A	G	0.718	-0.054	0.009	4.34e-10	Inflammatory bowel disease	9.36301	Known	28067908	Unique
	5	173242251	rs9313620	C	T	0.483	0.029	0.005	1.48e-08	Heart failure	7.82974	Known	40038546	Unique
	5	177386403	rs3812036	T	C	0.299	0.036	0.006	7.97e-11	Chronic kidney disease	10.0985	Known	31152163	Unique
	6	396321	rs12203592	T	C	0.157	0.136	0.019	3.27e-13	Skin	12.4857	Novel		Unique
	6	1975822	rs140199125	T	C	0.006	0.631	0.116	4.65e-08	Idiopathic pulmonary fibrosis	7.33283	Novel		Unique
	6	7106083	rs2842895	G	C	0.454	0.048	0.007	6.34e-11	Pancreas fibrosis	10.1976	Known	38806679	Unique
	6	7562999	rs2076295	T	G	0.558	-0.163	0.013	2.13e-36	Idiopathic pulmonary fibrosis	35.672	Known	35688625	Unique
	6	14719479	rs1267489	T	C	0.127	-0.069	0.011	3.05e-10	Inflammatory bowel disease	9.51513	Known	26974007	Unique
	6	15161013	rs73373435	T	C	0.886	0.1	0.018	1.49e-08	Dupuytren's disease	7.82711	Novel	37315093	Unique
	6	20687890	rs10440833	A	T	0.323	0.036	0.005	3.62e-12	Chronic kidney disease	11.4411	Known	39024449	Unique
	6	21884209	rs952579	A	G	0.215	0.071	0.01	7.75e-12	Inflammatory bowel disease	11.1106	Known	26974007	Unique
	6	22236749	rs17204453	A	C	0.54	0.061	0.011	1.15e-08	Dupuytren's disease	7.93779	Novel	37315093	Unique
	6	25075489	rs72826361	C	G	0.089	-0.107	0.013	1.88e-16	Liver fibrosis	15.7269	Known	38806679	Unique
	6	25578205	rs75580845	C	T	0.089	-0.225	0.013	4.35e-66	Liver fibrosis	65.361	Known	38806679	Unique
	6	26072764	rs144861591	T	C	0.072	-0.104	0.016	2.96e-11	Renal fibrosis	10.5284	Known	38806679	Unique
	6	26092913	rs1800562	A	G	0.074	-0.337	0.014	1.38e-126	Liver fibrosis	125.861	Known	38806679	Unique
	6	26123274	rs115740542	T	C	0.941	-0.122	0.015	8.59e-17	Cirrhosis	16.0659	Known	37965154	Duplicate
	6	26123274	rs115740542	C	T	0.07	-0.082	0.013	2.71e-10	Myocardial fibrosis	9.56671	Known	38806679	Duplicate
	6	27033276	rs13191659	G	C	0.084	-0.211	0.013	3.50e-55	Liver fibrosis	54.4554	Known	38806679	Unique
	6	27707511	rs1139226	A	T	0.774	0.054	0.01	4.11e-08	Inflammatory bowel disease	7.38637	Known	38154582	Unique
	6	27744747	rs142175606	AT	A	0.085	-0.203	0.014	7.84e-49	Liver fibrosis	48.1057	Known	38806679	Unique
	6	28052287	rs74537235	A	C	0.968	-0.174	0.029	2.95e-09	Phimosis	8.53033	Novel		Unique
	6	28468358	rs537533038	A	AAC	0.086	-0.176	0.013	5.10e-41	Liver fibrosis	40.2928	Known	38806679	Unique
	6	29064485	rs3129803	G	A	0.091	-0.142	0.013	2.80e-28	Liver fibrosis	27.5528	Known	38806679	Unique
	6	29961759	rs9260707	A	G	0.083	-0.136	0.014	3.68e-23	Liver fibrosis	22.4345	Known	38806679	Unique
	6	30465834	rs2524172	A	G	0.155	-0.061	0.01	1.35e-09	Liver fibrosis	8.86916	Known	38806679	Unique
	6	30814428	rs886423	C	G	0.156	0.1	0.016	1.56e-09	Dupuytren's disease	8.80799	Known	37315093	Unique
	6	31373994	rs2523517	A	G	0.352	0.048	0.008	7.05e-10	Liver fibrosis	9.15204	Known	38806679	Unique
	6	32039081	rs6467	C	A	0.402	0.046	0.008	2.17e-09	Liver fibrosis	8.66354	Known	38806679	Unique
	6	32205822	rs138753323	T	C	0.979	-0.373	0.023	2.18e-59	Inflammatory bowel disease	58.6615	Known	21699788	Unique
	6	32570654	rs113395139	T	C	0.685	-0.176	0.03	7.01e-09	Peyronie's disease	8.15453	Novel		Unique
	6	32610606	rs12662632	C	G	0.024	0.522	0.031	2.66e-63	Phimosis	62.5745	Known	38915890	Unique
	6	32636375	rs9272324	A	G	0.561	-0.077	0.008	1.84e-20	Chronic kidney disease	19.7361	Known	36627639	Unique
	6	32647644	rs7745002	A	G	0.543	-0.086	0.012	3.42e-13	Dupuytren's disease	12.4656	Known	37315093	Unique
	6	32648168	rs17612712	T	A	0.411	0.047	0.008	4.23e-09	Liver fibrosis	8.37366	Known	38806679	Unique
	6	32652987	rs77062257	A	T	0.866	0.086	0.014	1.85e-09	Cirrhosis	8.73283	Known	23321320	Unique
	6	32658525	rs9273364	T	G	0.711	-0.148	0.013	4.80e-28	Trigger finger	27.3186	Novel		Unique
	6	32706034	rs141345764	T	G	0.06	0.62	0.043	4.99e-48	Systemic sclerosis	47.3017	Known	38296975	Unique
	6	33181796	rs147467236	AT	A	0.152	-0.061	0.01	2.76e-10	Carpal tunnel syndrome	9.55909	Known	35332129	Unique
	6	34656128	rs112540634	C	T	0.846	-0.039	0.007	1.86e-08	Heart failure	7.73095	Known	40038546	Unique
	6	35498009	rs1051952	A	C	0.516	-0.08	0.011	9.04e-14	Dupuytren's disease	13.0436	Known	37315093	Unique
	6	35509255	rs2064317	A	G	0.616	0.071	0.013	4.34e-08	Idiopathic pulmonary fibrosis	7.36301	Known	36777997	Unique
	6	36679512	rs3176326	A	G	0.194	-0.069	0.006	2.40e-27	Heart failure	26.6202	Known	40038546	Unique
	6	37166858	rs199754787	AT	A	0.02	-0.13	0.02	4.93e-08	Myocardial fibrosis	7.30715	Known	38806679	Unique
	6	41699768	rs28360642	A	C	0.829	-0.105	0.014	3.75e-14	Dupuytren's disease	13.4263	Known	38172110	Unique
	6	42040465	rs13206037	C	G	0.781	-0.069	0.01	2.72e-12	Inflammatory bowel disease	11.565	Known	28067908	Unique
	6	43237323	rs2841662	C	G	0.351	0.027	0.005	3.80e-08	Heart failure	7.4201	Known	40038546	Unique
	6	44828859	rs524492	T	C	0.283	0.08	0.012	5.51e-12	Dupuytren's disease	11.2592	Novel	37315093	Unique
	6	50979582	rs4082052	T	C	0.676	-0.029	0.005	2.51e-09	Chronic kidney disease	8.59963	Known	38858783	Unique
	6	56559434	rs9349828	T	C	0.705	0.068	0.012	1.41e-08	Dupuytren's disease	7.85017	Novel	37315093	Unique
	6	85098630	rs56214011	A	G	0.078	-0.082	0.013	2.73e-10	Carpal tunnel syndrome	9.56384	Known	35332129	Unique
	6	90239477	rs62408223	A	G	0.869	0.065	0.012	1.68e-08	Inflammatory bowel disease	7.77366	Known	26974007	Unique
	6	106041095	rs7761376	T	G	0.42	0.077	0.008	4.40e-21	Inflammatory bowel disease	20.3564	Known	26974007	Unique
	6	106271184	rs11752888	A	G	0.201	0.15	0.022	1.38e-11	Systemic sclerosis	10.8598	Known	24387989	Unique
	6	109054915	rs11153158	T	C	0.864	0.082	0.013	5.56e-11	Inflammatory bowel disease	10.2552	Known	28067912	Unique
	6	111592059	rs33980500	T	C	0.072	0.109	0.015	9.42e-14	Inflammatory bowel disease	13.0258	Known	28067908	Unique
	6	114386166	rs117171280	A	T	0.997	-1.076	0.191	1.74e-08	Plantar fibromatosis	7.7592	Novel		Unique
	6	116125413	rs1064583	G	A	0.377	-0.042	0.007	3.29e-09	Carpal tunnel syndrome	8.4828	Known	35332129	Unique
	6	130027974	rs6569648	T	C	0.785	-0.032	0.006	2.75e-08	Chronic kidney disease	7.56004	Known	39024449	Unique
	6	134058731	rs2627230	T	A	0.4	0.052	0.007	8.08e-14	Myocardial fibrosis	13.0927	Known	38806679	Unique
	6	137684378	rs17264332	A	G	0.805	-0.084	0.01	3.68e-18	Inflammatory bowel disease	17.4344	Known	26974007	Unique
	6	149413961	rs366905	A	T	0.506	0.133	0.011	4.08e-36	Dupuytren's disease	35.3898	Known	37315093	Unique
	6	159650620	rs9457699	G	T	0.3	-0.05	0.01	2.00e-11	Myocardial fibrosis	10.699	Known	38806679	Unique
	6	160253600	rs3127579	A	G	0.114	0.071	0.007	6.10e-24	Chronic kidney disease	23.215	Known	39024449	Unique
	6	160589086	rs10455872	A	G	0.931	-0.097	0.009	2.81e-26	Heart failure	25.5518	Known	40038546	Unique
	6	167078151	rs4710176	T	C	0.595	-0.063	0.008	5.81e-15	Inflammatory bowel disease	14.2357	Known	26974007	Unique
	6	168080622	rs6927897	T	C	0.744	-0.03	0.005	1.27e-08	Chronic kidney disease	7.89722	Novel		Unique
	7	543598	rs34890891	T	C	0.602	0.143	0.012	1.86e-33	Dupuytren's disease	32.7307	Known	37315093	Unique
	7	1246556	rs13230509	C	G	0.66	0.036	0.005	3.69e-13	Chronic kidney disease	12.4331	Known	37919891	Unique
	7	2772998	rs35957220	C	G	0.655	0.064	0.009	1.15e-13	Inflammatory bowel disease	12.9385	Known	26974007	Unique
	7	3294340	rs73038857	T	G	0.258	-0.131	0.012	9.04e-28	Dupuytren's disease	27.0437	Known	37315093	Unique
	7	5285782	rs139805598	T	C	0.029	0.356	0.027	1.25e-40	Inflammatory bowel disease	39.902	Known	37156999	Unique
	7	16082848	rs12539945	A	G	0.439	0.048	0.007	4.94e-12	Carpal tunnel syndrome	11.3063	Known	35332129	Unique
	7	19013110	rs57301765	A	G	0.188	0.035	0.006	1.30e-08	Chronic kidney disease	7.88773	Novel		Unique
	7	28145472	rs849141	A	G	0.303	0.119	0.021	1.01e-08	Systemic sclerosis	7.99525	Known	23740937	Unique
	7	28216621	rs498475	A	G	0.642	-0.027	0.005	1.18e-08	Chronic kidney disease	7.92849	Known	39024449	Unique
	7	37946454	rs2122625	T	G	0.866	-0.234	0.025	3.09e-20	Plantar fibromatosis	19.5102	Novel		Unique
	7	37976920	rs74335252	T	G	0.881	-0.592	0.014	1.00e-379	Dupuytren's disease	379	Known	37315093	Unique
	7	38020602	rs67767155	T	C	0.224	0.172	0.025	6.88e-12	Peyronie's disease	11.1625	Known	22489561	Unique
	7	44139027	rs1008384	G	A	0.252	-0.052	0.008	1.17e-10	Carpal tunnel syndrome	9.93181	Known	35332129	Unique
	7	45988851	rs1722123	T	C	0.481	0.077	0.013	8.02e-10	Trigger finger	9.09583	Novel		Unique
	7	50283578	rs4917129	T	C	0.43	-0.062	0.008	1.09e-14	Inflammatory bowel disease	13.9614	Known	26974007	Unique
	7	70076196	rs7794623	A	C	0.337	0.027	0.005	3.80e-08	Chronic kidney disease	7.41965	Novel		Unique
	7	74781840	rs199789198	A	C	0.025	0.197	0.033	3.51e-09	Inflammatory bowel disease	8.45432	Known	37156999	Unique
	7	75424216	rs113744930	A	G	0.11	0.048	0.008	5.86e-09	Heart failure	8.23232	Known	40038546	Unique
	7	84370484	rs17214004	T	C	0.088	0.079	0.011	1.52e-12	Carpal tunnel syndrome	11.8182	Known	35332129	Unique
	7	92655809	rs11773884	A	G	0.697	0.038	0.005	4.09e-13	Heart failure	12.388	Known	40038546	Unique
	7	98348358	rs4727392	A	G	0.286	-0.07	0.013	2.38e-08	Dupuytren's disease	7.62361	Novel	37315093	Unique
	7	100007746	rs11770546	A	G	0.365	0.106	0.013	6.44e-16	Idiopathic pulmonary fibrosis	15.1908	Known	35688625	Unique
	7	100621544	rs12673102	A	G	0.194	0.057	0.011	4.70e-08	Inflammatory bowel disease	7.32809	Known	36753304	Unique
	7	106776021	rs13225723	A	G	0.284	0.045	0.006	2.20e-14	Chronic kidney disease	13.6576	Known	39024449	Unique
	7	107880959	rs6961243	A	G	0.394	-0.083	0.008	5.72e-24	Inflammatory bowel disease	23.2425	Known	26974007	Unique
	7	117267325	rs34911130	T	C	0.541	0.136	0.014	1.02e-23	Dupuytren's disease	22.9931	Known	37315093	Unique
	7	117273989	rs6951125	A	G	0.452	-0.365	0.023	2.38e-58	Peyronie's disease	57.6234	Known	39024449	Unique
	7	117659380	rs113827944	A	G	0.018	0.276	0.049	2.27e-08	Idiopathic pulmonary fibrosis	7.64378	Novel		Unique
	7	128830784	rs3734972	C	T	0.913	0.047	0.008	1.72e-08	Heart failure	7.76346	Known	40038546	Unique
	7	128935498	rs3778754	C	G	0.562	-0.067	0.008	4.53e-17	Inflammatory bowel disease	16.3443	Known	26974007	Unique
	7	129043485	rs35188261	A	G	0.13	0.327	0.029	1.27e-28	Systemic sclerosis	27.8959	Known	29293537	Unique
	7	134906346	rs12707188	T	C	0.354	-0.065	0.011	7.34e-09	Dupuytren's disease	8.1346	Novel	37315093	Unique
	7	143381899	rs559228739	T	C	0.997	-0.802	0.133	1.50e-09	Idiopathic pulmonary fibrosis	8.82362	Novel		Unique
	7	150845427	rs6977081	T	G	0.349	-0.056	0.007	3.97e-14	Carpal tunnel syndrome	13.4012	Known	35332129	Unique
	7	150993088	rs3918226	C	T	0.919	-0.048	0.009	4.09e-08	Heart failure	7.38775	Known	40038546	Unique
	7	151716108	rs10224210	T	C	0.765	-0.088	0.005	3.93e-61	Chronic kidney disease	60.4051	Known	39024449	Unique
	8	9324101	rs2126263	A	G	0.887	-0.068	0.012	9.56e-09	Cirrhosis	8.01972	Known	38632349	Unique
	8	10840708	rs3808603	C	T	0.555	-0.027	0.005	1.99e-08	Heart failure	7.70006	Known	40038546	Unique
	8	11486464	rs2736340	T	C	0.271	0.208	0.02	2.01e-24	Systemic sclerosis	23.6966	Known	30572963	Unique
	8	18415790	rs1495743	G	C	0.225	-0.051	0.009	5.31e-09	Liver fibrosis	8.27491	Known	38806679	Unique
	8	23890907	rs34861762	T	C	0.455	0.026	0.005	1.83e-08	Chronic kidney disease	7.73779	Known	31152163	Unique
	8	26009867	rs901177	A	T	0.718	-0.177	0.011	7.30e-55	Dupuytren's disease	54.1367	Known	37315093	Unique
	8	30381911	rs11781923	A	G	0.479	-0.062	0.011	1.65e-08	Dupuytren's disease	7.78225	Novel	37315093	Unique
	8	37615393	rs713189	A	G	0.178	0.11	0.014	4.96e-15	Dupuytren's disease	14.3041	Novel	37315093	Unique
	8	60605239	rs600811	T	C	0.373	0.111	0.02	1.59e-08	Systemic sclerosis	7.79833	Known	31672989	Unique
	8	69142848	rs652483	A	G	0.745	-0.312	0.012	9.43e-159	Dupuytren's disease	158.025	Known	37315093	Unique
	8	70449387	rs12156267	A	G	0.544	-0.16	0.021	8.41e-14	Peyronie's disease	13.0754	Novel		Unique
	8	71979513	rs10111413	A	G	0.275	0.055	0.009	2.35e-09	Inflammatory bowel disease	8.62986	Novel		Unique
	8	91203695	rs7817853	A	G	0.327	-0.076	0.011	3.19e-11	Dupuytren's disease	10.4959	Novel	37315093	Unique
	8	95789374	rs4332098	C	G	0.177	0.091	0.014	7.15e-11	Dupuytren's disease	10.1456	Novel	37315093	Unique
	8	108107899	rs443680	A	G	0.463	-0.223	0.011	4.66e-98	Dupuytren's disease	97.3316	Known	37315093	Unique
	8	125495066	rs2980888	T	C	0.306	0.104	0.007	8.47e-45	Cirrhosis	44.0721	Known	38632349	Unique
	8	128528218	rs16903065	A	C	0.12	-0.074	0.012	9.38e-10	Inflammatory bowel disease	9.02794	Known	26974007	Unique
	8	140764477	rs4378011	A	G	0.501	0.114	0.011	1.49e-26	Dupuytren's disease	25.8256	Known	37315093	Unique
	8	144103704	rs34173062	A	G	0.065	0.098	0.016	1.75e-09	Inflammatory bowel disease	8.75671	Known	38154582	Unique
	8	144301555	rs7386615	T	C	0.488	0.113	0.011	1.18e-25	Dupuytren's disease	24.9281	Known	37315093	Unique
	9	554368	rs58774558	G	C	0.06	0.08	0.01	1.74e-08	Myocardial fibrosis	7.75945	Known	38806679	Unique
	9	1202545	rs59561587	A	G	0.267	0.218	0.012	8.00e-79	Dupuytren's disease	78.0969	Known	37315093	Unique
	9	4366497	rs74573085	A	C	0.869	-0.148	0.015	1.15e-22	Dupuytren's disease	21.9401	Known	37315093	Unique
	9	4984530	rs1887428	C	G	0.615	-0.11	0.008	3.56e-40	Inflammatory bowel disease	39.4492	Known	26974007	Unique
	9	18629794	rs1576900	A	G	0.29	-0.049	0.007	3.63e-11	Myocardial fibrosis	10.4403	Known	38806679	Unique
	9	22094331	rs4977757	A	G	0.545	-0.052	0.006	5.88e-19	Heart failure	18.2309	Known	40038546	Unique
	9	22136441	rs12555274	C	G	0.273	0.031	0.005	1.01e-08	Chronic kidney disease	7.99353	Known	39024449	Unique
	9	35000292	rs10972278	A	G	0.633	0.067	0.011	5.37e-09	Dupuytren's disease	8.27019	Novel	37315093	Unique
	9	91169376	rs10739913	C	G	0.318	0.061	0.011	3.67e-08	Phimosis	7.43569	Novel		Unique
	9	92302480	rs6479418	A	G	0.329	-0.086	0.011	3.87e-14	Dupuytren's disease	13.4123	Novel	37315093	Unique
	9	107666196	rs79752115	A	C	0.113	0.109	0.019	1.56e-08	Trigger finger	7.80604	Novel		Unique
	9	108425271	rs504009	A	T	0.154	-0.081	0.014	1.77e-08	Dupuytren's disease	7.75227	Novel	37315093	Unique
	9	114371911	rs7043196	T	C	0.488	-0.047	0.007	9.55e-12	Cirrhosis	11.02	Known	23000144	Unique
	9	114806486	rs6478109	A	G	0.309	-0.078	0.009	2.27e-19	Inflammatory bowel disease	18.6432	Known	21699788	Unique
	9	115125613	rs4979496	A	G	0.64	-0.11	0.011	2.91e-24	Dupuytren's disease	23.5357	Known	37315093	Unique
	9	126910488	rs79101546	T	G	0.243	-0.059	0.008	5.83e-14	Carpal tunnel syndrome	13.2343	Known	35332129	Unique
	9	129804387	rs7029757	A	G	0.069	-0.132	0.017	6.15e-15	Cirrhosis	14.2112	Known	38632349	Unique
	9	130785412	rs11244139	T	C	0.084	0.075	0.014	4.87e-08	Inflammatory bowel disease	7.31292	Novel		Unique
	9	133264504	rs782134971	G	GAAACTGCC	0.25	0.075	0.008	4.80e-19	Pancreas fibrosis	18.3188	Known	38806679	Unique
	9	133271001	rs527210	T	C	0.315	0.062	0.008	9.53e-15	Liver fibrosis	14.0209	Known	38806679	Unique
	9	133276354	rs600038	C	T	0.214	0.045	0.006	2.36e-15	Heart failure	14.6276	Known	40038546	Unique
	9	133563561	rs9722048	A	G	0.447	0.059	0.007	1.75e-16	Carpal tunnel syndrome	15.757	Known	35332129	Unique
	9	136372044	rs4077515	T	C	0.42	0.083	0.008	2.45e-25	Inflammatory bowel disease	24.6099	Known	26974007	Unique
	10	853131	rs80282103	A	T	0.923	-0.063	0.008	7.13e-14	Chronic kidney disease	13.1468	Known	31152163	Unique
	10	4661075	rs313490	T	G	0.791	0.092	0.016	2.86e-08	Dupuytren's disease	7.54303	Novel	37315093	Unique
	10	4987956	rs68057779	T	C	0.882	0.267	0.037	4.05e-13	Peyronie's disease	12.393	Novel		Unique
	10	5007406	rs67245807	G	C	0.205	0.047	0.009	4.40e-08	Carpal tunnel syndrome	7.35655	Known	35332129	Unique
	10	6056986	rs706778	T	C	0.462	0.06	0.01	7.02e-09	Phimosis	8.15379	Novel		Unique
	10	27644947	rs2815536	A	G	0.435	-0.053	0.007	3.84e-14	Carpal tunnel syndrome	13.4157	Known	35332129	Unique
	10	30439321	rs2907	A	G	0.388	-0.053	0.008	9.70e-11	Inflammatory bowel disease	10.0132	Known	26974007	Unique
	10	30817960	rs57822625	T	C	0.146	0.064	0.01	2.49e-10	Carpal tunnel syndrome	9.6038	Known	35332129	Unique
	10	31044551	rs57718262	T	G	0.187	-0.089	0.016	4.75e-08	Trigger finger	7.3234	Novel		Unique
	10	35126627	rs4934730	A	G	0.629	-0.063	0.008	4.10e-14	Inflammatory bowel disease	13.3876	Known	26974007	Unique
	10	35797933	rs10827544	T	C	0.884	-0.111	0.018	4.53e-10	Dupuytren's disease	9.34352	Known	37315093	Unique
	10	45452222	rs147514068	T	C	0.007	0.609	0.1	1.07e-09	Skin	8.96859	Novel		Unique
	10	48162047	rs2438988	A	G	0.366	-0.048	0.008	2.01e-09	Pancreas fibrosis	8.69582	Known	38806679	Unique
	10	58517155	rs7098329	T	C	0.534	-0.044	0.005	1.87e-19	Chronic kidney disease	18.727	Known	39024449	Unique
	10	58557344	rs35079883	C	CT	0.48	-0.045	0.008	1.90e-08	Renal fibrosis	7.72125	Known	38806679	Unique
	10	62685804	rs10761659	A	G	0.465	-0.101	0.008	1.99e-36	Inflammatory bowel disease	35.702	Known	26974007	Unique
	10	70672742	rs12762780	C	A	0.483	0.052	0.007	6.23e-14	Carpal tunnel syndrome	13.2055	Known	35332129	Unique
	10	73657491	rs4746140	C	G	0.156	-0.066	0.007	1.87e-22	Heart failure	21.7279	Known	40038546	Unique
	10	73860999	rs2664282	T	C	0.53	-0.052	0.008	4.76e-11	Inflammatory bowel disease	10.3228	Known	26974007	Unique
	10	74301204	rs56015006	A	G	0.363	-0.032	0.005	1.82e-10	Chronic kidney disease	9.73969	Known	39256582	Unique
	10	77923160	rs12220902	T	C	0.234	-0.07	0.012	1.40e-08	Dupuytren's disease	7.85511	Novel	37315093	Unique
	10	79299578	rs1250551	T	G	0.407	-0.062	0.008	1.48e-13	Inflammatory bowel disease	12.8312	Known	26974007	Unique
	10	80415193	rs11202832	T	C	0.569	0.035	0.005	7.50e-13	Chronic kidney disease	12.125	Known	26305897	Unique
	10	80524756	rs7096909	A	T	0.22	-0.064	0.01	2.40e-10	Inflammatory bowel disease	9.62015	Known	26974007	Unique
	10	92670150	rs11187129	T	C	0.528	-0.051	0.008	2.09e-10	Inflammatory bowel disease	9.67985	Known	26974007	Unique
	10	95498707	rs1409712	A	G	0.249	0.037	0.006	5.83e-10	Chronic kidney disease	9.23426	Known	25476525	Unique
	10	98186463	rs1325494	G	C	0.435	-0.06	0.007	7.00e-18	Carpal tunnel syndrome	17.1549	Known	35332129	Unique
	10	98256556	rs1983866	A	T	0.678	0.034	0.005	1.15e-10	Chronic kidney disease	9.94082	Known	31959995	Unique
	10	99523573	rs10748781	A	C	0.636	-0.12	0.008	3.18e-48	Inflammatory bowel disease	47.4981	Known	26974007	Unique
	10	100164661	rs10883451	T	C	0.529	0.054	0.007	8.99e-15	Cirrhosis	14.0462	Known	38632349	Unique
	10	103918139	rs4387287	A	C	0.165	-0.098	0.018	2.22e-08	Idiopathic pulmonary fibrosis	7.65306	Known	35688625	Unique
	10	110765326	rs1971596	C	G	0.422	-0.074	0.013	6.98e-09	Idiopathic pulmonary fibrosis	8.15614	Novel		Unique
	10	112228257	rs12571496	A	C	0.18	-0.082	0.009	1.33e-18	Cirrhosis	17.8755	Known	38632349	Unique
	10	112998590	rs7903146	T	C	0.209	0.066	0.005	2.01e-38	Chronic kidney disease	37.6966	Known	39024449	Unique
	10	118359725	rs1930971	A	G	0.581	-0.078	0.011	1.07e-13	Phimosis	12.9706	Known	38915890	Unique
	10	119656173	rs72840788	A	G	0.218	-0.041	0.006	1.45e-12	Heart failure	11.8389	Known	40038546	Unique
	10	121481809	rs2912798	A	G	0.171	0.186	0.014	8.73e-42	Dupuytren's disease	41.0588	Known	37315093	Unique
	10	129043829	rs11598539	C	T	0.259	-0.053	0.008	1.72e-10	Carpal tunnel syndrome	9.76447	Known	35332129	Unique
	11	611919	rs702966	C	G	0.764	0.203	0.032	3.65e-10	Systemic sclerosis	9.43806	Known	30573655	Unique
	11	1219991	rs35705950	T	G	0.11	0.828	0.02	1.00e-358	Idiopathic pulmonary fibrosis	358	Known	35688625	Unique
	11	1852991	rs907612	T	C	0.387	0.046	0.008	2.56e-08	Inflammatory bowel disease	7.59159	Known	26974007	Unique
	11	8027704	rs149013553	A	G	0.155	0.042	0.007	3.53e-10	Chronic kidney disease	9.45198	Known	39024449	Unique
	11	8997643	rs61876274	A	T	0.495	-0.046	0.008	1.07e-08	Inflammatory bowel disease	7.96981	Novel		Unique
	11	12193635	rs10831757	A	C	0.434	-0.094	0.011	7.46e-19	Dupuytren's disease	18.1271	Known	38172110	Unique
	11	15841782	rs1465893	A	G	0.3	-0.073	0.012	2.88e-10	Dupuytren's disease	9.54106	Novel	37315093	Unique
	11	30738788	rs3925584	T	C	0.525	0.065	0.005	4.36e-41	Chronic kidney disease	40.3606	Known	39024449	Unique
	11	31584600	rs10767900	C	G	0.259	0.078	0.013	3.93e-10	Dupuytren's disease	9.40506	Novel	37315093	Unique
	11	34652855	rs286897	C	G	0.688	0.051	0.009	3.38e-08	Inflammatory bowel disease	7.4707	Novel		Unique
	11	47327151	rs3781622	T	C	0.602	0.035	0.005	1.78e-13	Chronic kidney disease	12.7493	Known	35870639	Unique
	11	55461364	rs141375403	A	T	0.061	0.053	0.009	1.60e-09	Chronic kidney disease	8.7948	Known	31959995	Unique
	11	61811991	rs174554	G	A	0.342	0.043	0.008	3.12e-08	Liver fibrosis	7.50579	Known	38806679	Unique
	11	61820833	rs174564	A	G	0.603	-0.048	0.008	5.27e-09	Inflammatory bowel disease	8.27827	Known	26974007	Unique
	11	65480606	rs111308917	A	G	0.836	-0.114	0.017	2.52e-11	Trigger finger	10.5981	Known	36043126	Unique
	11	65784647	rs948494	A	G	0.422	0.054	0.005	5.97e-29	Chronic kidney disease	28.2239	Known	34272381	Unique
	11	66609564	rs7119588	C	T	0.053	0.095	0.015	4.23e-10	Carpal tunnel syndrome	9.37366	Known	35332129	Unique
	11	76588605	rs11236797	A	C	0.412	0.095	0.008	4.96e-32	Inflammatory bowel disease	31.3041	Known	26974007	Unique
	11	89284793	rs1126809	A	G	0.269	0.084	0.013	4.10e-10	Skin	9.38764	Novel		Unique
	11	89491309	rs2289124	A	G	0.152	-0.114	0.018	2.25e-10	Trigger finger	9.64762	Novel		Unique
	11	114570526	rs511590	T	C	0.383	-0.052	0.008	4.70e-10	Inflammatory bowel disease	9.32799	Known	26974007	Unique
	11	118749251	rs3889239	T	C	0.209	-0.167	0.025	1.29e-11	Systemic sclerosis	10.8904	Known	24387989	Unique
	11	121756557	rs10790457	T	C	0.207	0.04	0.005	6.45e-13	Chronic kidney disease	12.1908	Known	35710981	Unique
	11	128459018	rs8705	A	G	0.418	-0.038	0.005	3.60e-13	Chronic kidney disease	12.4437	Known	33462484	Unique
	11	128693518	rs12420835	A	C	0.474	-0.078	0.011	9.68e-14	Dupuytren's disease	13.0141	Novel	37315093	Unique
	12	4020790	rs4491325	A	C	0.248	0.056	0.009	2.13e-10	Pancreas fibrosis	9.67231	Known	38806679	Unique
	12	41932102	rs10699697	A	ACCG	0.377	-0.041	0.008	4.86e-08	Pancreas fibrosis	7.31336	Known	38806679	Unique
	12	49005349	rs1126930	C	G	0.032	0.076	0.013	9.61e-09	Chronic kidney disease	8.01746	Known	35710981	Unique
	12	64049871	rs61931202	T	G	0.755	-0.068	0.012	9.20e-09	Dupuytren's disease	8.03631	Novel	37315093	Unique
	12	65788675	rs971779	A	G	0.12	0.04	0.007	3.77e-09	Chronic kidney disease	8.42331	Known	39024449	Unique
	12	68110722	rs1558743	T	G	0.66	-0.095	0.008	2.38e-31	Inflammatory bowel disease	30.6225	Known	26974007	Unique
	12	69277378	rs604168	G	A	0.289	0.046	0.008	1.07e-09	Carpal tunnel syndrome	8.97062	Known	35332129	Unique
	12	77236648	rs7307337	T	G	0.721	0.065	0.012	3.76e-08	Dupuytren's disease	7.42481	Novel	37315093	Unique
	12	95860750	rs6538677	A	G	0.398	-0.092	0.013	8.15e-13	Idiopathic pulmonary fibrosis	12.0889	Novel		Unique
	12	105744149	rs61940062	A	G	0.657	0.096	0.011	5.32e-19	Dupuytren's disease	18.2743	Known	37315093	Unique
	12	106750550	rs12424114	A	G	0.642	0.034	0.005	4.43e-10	Heart failure	9.35379	Known	40038546	Unique
	12	111376351	rs7398796	T	C	0.719	0.045	0.008	2.31e-08	Cirrhosis	7.63564	Known	34594039	Unique
	12	111535554	rs597808	A	G	0.469	0.036	0.005	6.50e-12	Heart failure	11.1874	Known	40038546	Duplicate
	12	111535554	rs597808	A	G	0.427	0.031	0.005	3.77e-11	Chronic kidney disease	10.4238	Known	20383146	Duplicate
	12	111535554	rs597808	A	G	0.457	0.061	0.01	4.31e-09	Phimosis	8.36522	Novel		Duplicate
	12	111621753	rs11065979	T	C	0.402	0.048	0.008	6.16e-09	Inflammatory bowel disease	8.21035	Known	26974007	Unique
	12	114252139	rs1896008	A	T	0.405	0.06	0.011	1.48e-08	Phimosis	7.83003	Novel		Unique
	12	119709120	rs11064881	A	G	0.083	0.102	0.015	4.70e-12	Inflammatory bowel disease	11.3283	Known	37156999	Unique
	12	120235040	rs77660995	T	C	0.032	0.294	0.029	1.48e-24	Dupuytren's disease	23.8294	Known	37315093	Unique
	12	121005313	rs1169314	A	G	0.7	-0.049	0.008	8.11e-10	Cirrhosis	9.09125	Known	38632349	Unique
	12	124827879	rs10846744	C	G	0.164	0.036	0.006	2.37e-09	Chronic kidney disease	8.62507	Known	39024449	Unique
	13	26471802	rs12864131	A	G	0.446	0.06	0.011	1.08e-08	Dupuytren's disease	7.96457	Known	37315093	Unique
	13	26962439	rs9512466	C	G	0.364	-0.054	0.009	2.00e-10	Inflammatory bowel disease	9.69832	Known	26974007	Unique
	13	28527544	rs9550377	T	C	0.179	0.13	0.016	7.81e-16	Trigger finger	15.1074	Novel		Unique
	13	37549992	rs9576298	T	G	0.217	0.073	0.013	6.19e-09	Dupuytren's disease	8.20845	Novel	37315093	Unique
	13	40439840	rs941823	T	C	0.266	-0.078	0.009	1.90e-17	Inflammatory bowel disease	16.7203	Known	26974007	Unique
	13	44292821	rs4942308	T	C	0.694	0.121	0.011	2.07e-26	Dupuytren's disease	25.6849	Known	37315093	Unique
	13	99352859	rs9300538	A	G	0.151	-0.074	0.011	1.82e-12	Inflammatory bowel disease	11.7399	Known	26974007	Unique
	13	99384701	rs35694871	T	C	0.172	-0.09	0.014	4.47e-10	Phimosis	9.35008	Novel		Unique
	13	108439198	rs150620786	T	G	0.997	-0.933	0.169	3.55e-08	Peyronie's disease	7.44965	Novel		Unique
	13	110396288	rs9559788	C	T	0.672	-0.029	0.005	2.80e-08	Heart failure	7.55346	Known	40038546	Unique
	13	112882313	rs1278769	A	G	0.246	-0.084	0.015	1.77e-08	Idiopathic pulmonary fibrosis	7.75178	Known	35688625	Unique
	14	22843385	rs1042704	A	G	0.197	0.171	0.013	6.73e-43	Dupuytren's disease	42.1718	Known	37315093	Duplicate
	14	22843385	rs1042704	A	G	0.21	0.178	0.025	5.37e-13	Peyronie's disease	12.2703	Novel		Duplicate
	14	24090950	rs79873985	G	A	0.015	0.289	0.033	1.80e-18	Renal fibrosis	17.7445	Known	38806679	Unique
	14	24103723	rs111723834	A	G	0.016	0.326	0.029	2.28e-28	Liver fibrosis	27.6421	Known	38806679	Unique
	14	24306081	rs139893717	A	G	0.008	-0.286	0.051	2.29e-08	Cirrhosis	7.63941	Known	38632349	Unique
	14	24389911	rs116309956	A	G	0.036	0.159	0.027	5.91e-09	Dupuytren's disease	8.22827	Known	37315093	Unique
	14	34756277	rs8016548	T	C	0.278	0.063	0.011	2.53e-08	Dupuytren's disease	7.59705	Novel	37315093	Unique
	14	50269229	rs72683923	T	C	0.987	0.136	0.021	1.27e-10	Chronic kidney disease	9.8962	Known	31015462	Unique
	14	50498727	rs17791680	A	G	0.353	-0.137	0.011	1.20e-34	Dupuytren's disease	33.9219	Known	37315093	Unique
	14	61133661	rs56278927	A	G	0.246	0.07	0.012	1.06e-08	Dupuytren's disease	7.97675	Novel	37315093	Unique
	14	68760099	rs11629182	A	G	0.321	-0.065	0.01	2.69e-10	Inflammatory bowel disease	9.57025	Known	37156999	Unique
	14	69298927	rs1890942	A	G	0.378	-0.03	0.005	4.77e-09	Heart failure	8.32175	Known	40038546	Unique
	14	75779563	rs72725608	T	C	0.958	-0.232	0.029	1.02e-15	Trigger finger	14.9931	Novel		Duplicate
	14	75779563	rs72725608	C	T	0.045	0.118	0.017	4.01e-12	Carpal tunnel syndrome	11.3969	Known	35332129	Duplicate
	14	94378610	rs28929474	T	C	0.02	0.353	0.022	1.10e-56	Cirrhosis	55.9602	Known	37965154	Duplicate
	14	94378610	rs28929474	T	C	0.026	-0.27	0.027	2.90e-24	Carpal tunnel syndrome	23.5376	Known	35332129	Duplicate
	14	99673097	rs12050196	C	T	0.447	-0.043	0.007	1.27e-09	Carpal tunnel syndrome	8.8962	Known	35332129	Unique
	14	105999982	rs35209356	T	C	0.176	-0.125	0.02	6.10e-10	Inflammatory bowel disease	9.21453	Known	37156999	Unique
	15	38937539	rs8026743	A	G	0.348	-0.055	0.005	2.71e-27	Chronic kidney disease	26.5677	Known	31451708	Unique
	15	40428343	rs59424629	T	G	0.537	0.107	0.013	1.64e-17	Idiopathic pulmonary fibrosis	16.7849	Known	35688625	Unique
	15	41503702	rs316617	T	C	0.616	-0.036	0.005	1.38e-14	Chronic kidney disease	13.8595	Known	31015462	Unique
	15	45333281	rs1719246	A	T	0.409	0.054	0.005	4.82e-28	Chronic kidney disease	27.3174	Known	31959995	Unique
	15	53623569	rs62005941	C	G	0.749	0.061	0.006	1.30e-26	Chronic kidney disease	25.8874	Known	30604766	Unique
	15	55960411	rs2102465	T	C	0.308	0.143	0.011	4.65e-38	Dupuytren's disease	37.3323	Known	37315093	Unique
	15	59202474	rs2306787	T	C	0.405	-0.106	0.011	4.69e-23	Dupuytren's disease	22.329	Known	37315093	Unique
	15	60610443	rs17237297	T	C	0.242	0.08	0.012	3.19e-11	Dupuytren's disease	10.4962	Novel	37315093	Unique
	15	60613790	rs340019	A	G	0.576	0.044	0.008	4.50e-09	Cirrhosis	8.34679	Known	38632349	Unique
	15	60779075	rs7173227	T	C	0.219	-0.066	0.011	1.13e-09	Inflammatory bowel disease	8.945	Known	37156999	Unique
	15	66742474	rs1866745	A	G	0.356	0.052	0.007	4.74e-13	Carpal tunnel syndrome	12.3242	Known	35332129	Unique
	15	67156025	rs56375023	A	G	0.258	0.064	0.009	2.81e-12	Inflammatory bowel disease	11.5514	Known	26974007	Unique
	15	68333377	rs28522005	A	G	0.871	-0.138	0.016	8.53e-19	Dupuytren's disease	18.0692	Known	37315093	Unique
	15	71691435	rs1566573	T	C	0.667	0.074	0.013	4.23e-08	Trigger finger	7.37325	Novel		Unique
	15	73927205	rs1048661	T	G	0.328	-0.045	0.007	7.59e-10	Carpal tunnel syndrome	9.11976	Known	35332129	Unique
	15	74735539	rs2472297	T	C	0.254	-0.033	0.006	3.52e-09	Chronic kidney disease	8.45395	Known	33462484	Unique
	15	74791153	rs1378940	A	C	0.668	-0.14	0.02	2.99e-12	Systemic sclerosis	11.5242	Known	23740937	Unique
	15	74949814	rs2415251	T	C	0.563	-0.052	0.008	1.92e-10	Inflammatory bowel disease	9.71647	Novel		Unique
	15	75571574	rs11853464	A	G	0.896	-0.098	0.017	9.84e-09	Dupuytren's disease	8.00678	Novel	37315093	Unique
	15	75858740	rs4886747	A	G	0.814	0.038	0.006	5.92e-11	Chronic kidney disease	10.2278	Known	37277652	Unique
	15	78754351	rs2622821	A	G	0.358	-0.053	0.005	8.29e-24	Chronic kidney disease	23.0812	Known	39024449	Unique
	15	80675204	rs12440543	T	C	0.703	0.05	0.009	3.13e-08	Inflammatory bowel disease	7.50404	Known	37156999	Unique
	15	85669635	rs12904047	A	G	0.753	-0.084	0.012	6.15e-13	Dupuytren's disease	12.2108	Novel	37315093	Unique
	15	85742593	rs56141817	A	C	0.697	-0.079	0.014	4.78e-09	Idiopathic pulmonary fibrosis	8.32048	Known	35688625	Unique
	15	88715387	rs12594617	C	G	0.829	0.209	0.014	1.57e-48	Dupuytren's disease	47.8052	Known	37315093	Unique
	15	90551919	rs4404047	A	G	0.159	-0.082	0.011	4.47e-13	Inflammatory bowel disease	12.3502	Known	28067908	Unique
	15	100152748	rs72755233	A	G	0.117	0.096	0.011	2.67e-19	Carpal tunnel syndrome	18.5735	Known	35332129	Unique
	15	100862167	rs181258447	T	G	0.006	0.685	0.081	3.45e-17	Dupuytren's disease	16.4627	Known	37315093	Unique
	16	42195	rs62031426	T	G	0.055	0.217	0.03	4.18e-13	Idiopathic pulmonary fibrosis	12.3786	Known	36603154	Unique
	16	737738	rs12597563	C	G	0.22	0.035	0.006	9.57e-09	Heart failure	8.01895	Known	40038546	Unique
	16	1648265	rs190184570	C	G	0.003	0.795	0.13	8.33e-10	Idiopathic pulmonary fibrosis	9.07956	Novel		Unique
	16	4284961	rs72766530	A	C	0.253	0.078	0.012	3.38e-11	Dupuytren's disease	10.4712	Novel	37315093	Unique
	16	11622248	rs4780394	A	G	0.591	-0.073	0.008	8.37e-19	Inflammatory bowel disease	18.0772	Known	26974007	Unique
	16	20381010	rs77924615	A	G	0.219	-0.203	0.006	2.27e-215	Chronic kidney disease	214.644	Known	39024449	Unique
	16	21965441	rs4850	A	G	0.055	0.143	0.022	3.59e-11	Dupuytren's disease	10.4447	Novel	37315093	Unique
	16	23854665	rs886114	T	C	0.698	0.056	0.009	2.48e-11	Inflammatory bowel disease	10.6048	Known	26974007	Unique
	16	28806716	rs437564	T	C	0.427	0.035	0.005	2.06e-12	Chronic kidney disease	11.6853	Known	31959995	Unique
	16	28929595	rs56933819	T	G	0.572	0.046	0.008	1.80e-08	Inflammatory bowel disease	7.74449	Known	26974007	Unique
	16	30331915	rs140935476	A	G	0.412	0.045	0.008	4.03e-08	Inflammatory bowel disease	7.39437	Known	26974007	Unique
	16	50308747	rs17289102	T	C	0.242	0.075	0.009	5.44e-16	Inflammatory bowel disease	15.2647	Known	33686288	Unique
	16	53768073	rs9923544	T	C	0.438	0.055	0.007	5.03e-15	Carpal tunnel syndrome	14.2984	Known	35332129	Unique
	16	53772541	rs56094641	A	G	0.582	-0.053	0.005	9.07e-29	Chronic kidney disease	28.0424	Known	30566433	Unique
	16	53776774	rs7193144	C	T	0.408	0.042	0.005	4.91e-19	Heart failure	18.3087	Known	40038546	Unique
	16	53788590	rs7190396	T	G	0.601	-0.089	0.014	5.19e-10	Phimosis	9.28467	Novel		Unique
	16	53880018	rs11076004	A	G	0.438	0.124	0.013	2.47e-23	Trigger finger	22.6071	Known	36043126	Unique
	16	66667784	rs626743	A	G	0.062	0.159	0.021	1.07e-13	Dupuytren's disease	12.9714	Novel	37315093	Unique
	16	67383455	rs34845769	A	T	0.335	0.084	0.013	1.31e-10	Trigger finger	9.88306	Novel		Unique
	16	69541335	rs62052820	A	G	0.22	0.038	0.006	5.34e-10	Chronic kidney disease	9.27221	Known	29124443	Unique
	16	69853817	rs3790085	A	G	0.549	-0.116	0.013	1.02e-20	Trigger finger	19.9931	Known	36043126	Unique
	16	75200375	rs1432699355	C	CTTT	0.084	-0.145	0.014	5.05e-26	Pancreas fibrosis	25.2967	Known	38806679	Unique
	16	75391978	rs461994	A	T	0.844	-0.154	0.014	8.74e-29	Dupuytren's disease	28.0584	Known	37315093	Unique
	16	80606168	rs4545832	A	G	0.202	0.06	0.01	1.32e-09	Inflammatory bowel disease	8.87943	Known	27569725	Unique
	16	81504858	rs62046579	A	C	0.751	0.031	0.005	2.74e-08	Heart failure	7.56288	Known	40038546	Unique
	16	81883307	rs11548656	A	G	0.956	0.143	0.022	8.18e-11	Inflammatory bowel disease	10.0874	Known	28067908	Unique
	16	85938407	rs11117422	C	G	0.264	-0.19	0.024	4.99e-16	Systemic sclerosis	15.3021	Known	29293537	Unique
	16	85976134	rs16940186	T	C	0.854	-0.097	0.011	4.09e-19	Inflammatory bowel disease	18.3887	Known	26974007	Unique
	16	88292560	rs28481824	T	C	0.32	0.069	0.011	2.41e-10	Dupuytren's disease	9.61816	Novel	37315093	Unique
	16	88661325	rs6500487	T	C	0.593	0.073	0.013	1.44e-08	Trigger finger	7.84164	Novel		Unique
	16	88909502	rs7405380	C	G	0.378	0.046	0.008	1.33e-09	Pancreas fibrosis	8.8755	Known	38806679	Unique
	16	88914969	rs542857381	T	C	0.024	0.218	0.039	2.50e-08	Skin	7.60137	Novel		Unique
	16	89724871	rs35026726	T	C	0.082	0.233	0.023	1.06e-23	Skin	22.9727	Novel		Unique
	17	835420	rs8073697	A	T	0.685	0.084	0.012	2.73e-13	Dupuytren's disease	12.564	Novel	37315093	Unique
	17	2152006	rs1565763	T	C	0.688	-0.071	0.011	2.54e-10	Dupuytren's disease	9.59448	Novel	37315093	Unique
	17	2308204	rs505744	A	C	0.623	-0.081	0.013	2.29e-10	Trigger finger	9.64111	Novel		Unique
	17	5426796	rs138697742	A	G	0.965	0.151	0.027	1.85e-08	Inflammatory bowel disease	7.73212	Known	30801121	Unique
	17	13531674	rs61092548	T	C	0.134	0.132	0.015	1.40e-19	Dupuytren's disease	18.8523	Known	37315093	Unique
	17	19549399	rs2453571	A	G	0.789	-0.033	0.006	2.88e-08	Chronic kidney disease	7.54	Known	31152163	Unique
	17	20218088	rs2703819	A	G	0.582	0.066	0.011	2.79e-10	Dupuytren's disease	9.55408	Novel	37315093	Unique
	17	31388482	rs2854334	A	G	0.433	-0.06	0.011	3.05e-08	Dupuytren's disease	7.51556	Novel	37315093	Unique
	17	32709136	rs9911168	T	C	0.183	-0.122	0.014	2.87e-19	Dupuytren's disease	18.5427	Known	37315093	Unique
	17	34240660	rs11870164	T	C	0.284	-0.085	0.009	4.38e-21	Inflammatory bowel disease	20.359	Known	26974007	Unique
	17	39756124	rs12946510	T	C	0.51	0.09	0.008	1.52e-29	Inflammatory bowel disease	28.8182	Known	26974007	Unique
	17	39803764	rs2952144	C	T	0.524	-0.027	0.005	4.94e-09	Heart failure	8.30592	Known	40038546	Duplicate
	17	39803764	rs2952144	T	C	0.47	-0.109	0.019	8.54e-09	Systemic sclerosis	8.06869	Known	24387989	Duplicate
	17	42387807	rs3736164	T	G	0.281	-0.093	0.009	2.30e-25	Inflammatory bowel disease	24.6373	Known	26974007	Unique
	17	43690089	rs6503467	C	G	0.48	0.07	0.011	6.52e-11	Dupuytren's disease	10.1856	Known	28886342	Unique
	17	46126154	rs113120855	T	C	0.206	-0.16	0.016	4.39e-22	Idiopathic pulmonary fibrosis	21.3577	Known	35688625	Unique
	17	46931204	rs197922	A	G	0.373	0.028	0.005	1.11e-08	Chronic kidney disease	7.95585	Known	39256582	Unique
	17	46935905	rs17608766	C	T	0.143	0.038	0.007	3.19e-08	Heart failure	7.49635	Known	40038546	Unique
	17	48126317	rs78077208	A	G	0.817	0.074	0.011	4.05e-11	Inflammatory bowel disease	10.3921	Known	37156999	Unique
	17	48917942	rs55929017	A	T	0.202	-0.048	0.007	2.19e-12	Chronic kidney disease	11.6605	Known	39256582	Unique
	17	71315812	rs7223448	T	C	0.369	-0.104	0.013	2.33e-15	Trigger finger	14.6325	Novel		Unique
	17	75053342	rs9906330	A	G	0.5	-0.046	0.008	1.27e-08	Inflammatory bowel disease	7.8962	Novel		Unique
	17	75228544	rs1005714	C	G	0.826	0.146	0.026	1.28e-08	Systemic sclerosis	7.89143	Known	31672989	Unique
	17	78812691	rs7220532	T	C	0.422	0.028	0.005	2.61e-09	Chronic kidney disease	8.58386	Known	29545352	Unique
	17	78888144	rs2005542	A	T	0.082	-0.128	0.021	1.01e-09	Dupuytren's disease	8.99353	Known	21732829	Unique
	17	80426509	rs41300752	A	G	0.896	0.064	0.012	2.72e-08	Cirrhosis	7.56479	Known	38632349	Unique
	17	82105650	rs8065606	A	G	0.303	-0.032	0.005	9.85e-10	Chronic kidney disease	9.00634	Known	26420894	Unique
	18	9764336	rs11664921	A	G	0.085	-0.325	0.02	1.46e-56	Dupuytren's disease	55.8362	Known	37315093	Unique
	18	12779948	rs2542151	T	G	0.843	-0.11	0.01	1.66e-26	Inflammatory bowel disease	25.7802	Known	26974007	Unique
	18	24913975	rs62085779	C	G	0.064	0.156	0.026	1.23e-09	Trigger finger	8.90939	Novel		Unique
	18	44686951	rs16978141	A	T	0.917	0.106	0.019	2.74e-08	Dupuytren's disease	7.56209	Novel	37315093	Unique
	18	49646569	rs72915968	A	G	0.268	0.064	0.009	2.42e-12	Inflammatory bowel disease	11.6156	Novel		Unique
	18	54299403	rs34162186	C	G	0.564	0.058	0.011	3.33e-08	Phimosis	7.47743	Novel		Unique
	18	79396103	rs71359461	C	G	0.437	0.047	0.005	5.53e-22	Chronic kidney disease	21.2576	Known	37919891	Unique
	19	2038820	rs2287002	A	G	0.216	-0.05	0.008	2.08e-09	Carpal tunnel syndrome	8.68194	Known	35332129	Unique
	19	4031771	rs72976966	T	C	0.205	-0.037	0.007	2.63e-08	Chronic kidney disease	7.57971	Known	35870639	Unique
	19	7222366	rs4804411	C	G	0.57	0.046	0.007	1.26e-09	Cirrhosis	8.90032	Novel		Unique
	19	8605262	rs62621197	T	C	0.034	0.179	0.02	7.21e-20	Carpal tunnel syndrome	19.1421	Known	35332129	Unique
	19	10359299	rs12720356	A	C	0.918	-0.114	0.014	1.52e-16	Inflammatory bowel disease	15.8179	Known	26974007	Unique
	19	11078223	rs112374545	C	T	0.891	0.048	0.009	4.71e-08	Heart failure	7.32716	Known	40038546	Unique
	19	11156017	rs7251031	G	T	0.302	0.055	0.008	2.80e-13	Carpal tunnel syndrome	12.5528	Known	35332129	Unique
	19	18082381	rs2305743	A	G	0.212	-0.16	0.026	4.29e-10	Systemic sclerosis	9.36795	Known	30572963	Unique
	19	18464383	rs78030362	A	G	0.936	-0.262	0.02	2.30e-39	Dupuytren's disease	38.6379	Known	37315093	Unique
	19	19268740	rs58542926	T	C	0.075	0.316	0.012	4.78e-157	Cirrhosis	156.321	Known	37965154	Unique
	19	19277691	rs8107974	T	A	0.076	0.109	0.014	4.59e-15	Liver fibrosis	14.3384	Known	38806679	Unique
	19	19414983	rs2965185	T	C	0.776	-0.029	0.005	9.44e-09	Chronic kidney disease	8.02503	Known	33462484	Unique
	19	29700050	rs78094750	A	G	0.002	1.202	0.214	1.93e-08	Peyronie's disease	7.71489	Novel		Unique
	19	33269208	rs12611394	A	G	0.257	-0.094	0.009	3.95e-23	Inflammatory bowel disease	22.4036	Known	39792054	Unique
	19	39248489	rs4803221	C	G	0.8	-0.064	0.009	6.21e-14	Cirrhosis	13.2068	Novel		Unique
	19	39428185	rs251858	A	G	0.589	-0.052	0.008	1.46e-10	Inflammatory bowel disease	9.83624	Novel		Unique
	19	44908684	rs429358	T	C	0.851	0.124	0.01	4.95e-35	Cirrhosis	34.3055	Known	38632349	Unique
	19	45869960	rs7254364	A	G	0.205	0.053	0.009	1.04e-08	Inflammatory bowel disease	7.98506	Known	26974007	Unique
	19	48703205	rs681343	C	T	0.497	-0.049	0.007	4.87e-11	Liver fibrosis	10.3124	Known	38806679	Unique
	19	48706068	rs2548458	C	T	0.469	-0.073	0.007	1.70e-22	Pancreas fibrosis	21.7688	Known	38806679	Unique
	19	48756272	rs838133	A	G	0.437	0.052	0.007	2.62e-12	Cirrhosis	11.5809	Known	38632349	Unique
	19	57166826	rs11672517	A	G	0.222	0.272	0.012	2.32e-111	Dupuytren's disease	110.635	Known	37315093	Unique
	20	6492271	rs6054308	A	G	0.401	-0.21	0.022	8.48e-21	Peyronie's disease	20.0714	Known	39024449	Unique
	20	7262893	rs6117726	T	C	0.496	-0.048	0.007	8.98e-12	Carpal tunnel syndrome	11.0467	Known	35332129	Unique
	20	8334670	rs6055748	A	G	0.676	0.032	0.005	6.10e-10	Chronic kidney disease	9.21481	Known	39256582	Unique
	20	10648877	rs35308216	T	C	0.923	0.261	0.021	1.20e-34	Dupuytren's disease	33.9208	Known	37315093	Unique
	20	18445795	rs6136381	T	C	0.12	-0.046	0.008	2.10e-08	Chronic kidney disease	7.67737	Known	35870639	Unique
	20	21395188	rs6035868	C	T	0.608	-0.029	0.005	1.10e-09	Heart failure	8.96019	Known	40038546	Unique
	20	32448133	rs3746612	C	G	0.462	0.059	0.008	3.53e-13	Inflammatory bowel disease	12.4526	Known	26974007	Unique
	20	33917852	rs62209647	C	G	0.081	0.122	0.022	2.65e-08	Skin	7.57626	Novel		Unique
	20	34632266	rs6059956	T	C	0.444	-0.032	0.005	1.75e-12	Chronic kidney disease	11.7572	Known	31015462	Unique
	20	34972369	rs6120777	A	G	0.16	-0.057	0.009	9.20e-11	Myocardial fibrosis	10.036	Known	38806679	Unique
	20	35268871	rs2425039	T	C	0.109	0.136	0.025	3.27e-08	Skin	7.48572	Novel		Unique
	20	35437976	rs143384	A	G	0.567	0.085	0.013	1.62e-11	Trigger finger	10.7902	Novel		Unique
	20	40481539	rs12481155	T	C	0.048	-0.399	0.027	1.83e-48	Dupuytren's disease	47.7364	Known	37315093	Unique
	20	44436388	rs6017342	A	C	0.45	-0.09	0.008	2.21e-29	Inflammatory bowel disease	28.6552	Known	26974007	Unique
	20	46900932	rs2236519	A	G	0.355	-0.068	0.011	4.21e-10	Dupuytren's disease	9.3752	Novel	37315093	Unique
	20	50218794	rs2094716	C	A	0.462	0.048	0.007	1.32e-10	Pancreas fibrosis	9.87825	Known	38806679	Unique
	20	50370030	rs6012915	T	C	0.47	0.049	0.008	3.08e-09	Inflammatory bowel disease	8.51201	Known	28067908	Unique
	20	50441106	rs1810500	A	G	0.56	-0.17	0.021	8.87e-16	Peyronie's disease	15.0523	Known	39024449	Unique
	20	51573085	rs6013222	T	G	0.333	0.123	0.011	3.11e-29	Dupuytren's disease	28.5077	Known	37315093	Unique
	20	57571187	rs1569718	A	G	0.178	-0.039	0.006	5.94e-10	Chronic kidney disease	9.22592	Known	39256582	Unique
	20	59249254	rs259964	A	G	0.433	0.069	0.008	4.09e-18	Inflammatory bowel disease	17.3886	Known	26974007	Unique
	20	63605726	rs145783026	A	G	0.026	0.265	0.042	3.06e-10	Idiopathic pulmonary fibrosis	9.51456	Known	35688625	Unique
	20	63697746	rs6062496	A	G	0.628	0.091	0.008	2.52e-28	Inflammatory bowel disease	27.5983	Known	26974007	Unique
	21	15410764	rs2823254	A	T	0.752	-0.043	0.005	4.10e-16	Chronic kidney disease	15.3874	Known	31152163	Unique
	21	15427499	rs7276764	A	G	0.261	-0.102	0.009	3.54e-29	Inflammatory bowel disease	28.4505	Known	26974007	Unique
	21	27266812	rs235931	C	G	0.37	-0.07	0.011	2.96e-10	Dupuytren's disease	9.52944	Known	38172110	Unique
	21	29162364	rs2832228	A	G	0.146	0.05	0.007	1.85e-11	Heart failure	10.7317	Known	40038546	Unique
	21	32176053	rs76775133	A	T	0.881	-0.106	0.019	3.10e-08	Trigger finger	7.50878	Novel		Unique
	21	34016931	rs141675023	A	G	0.142	0.043	0.007	1.31e-09	Chronic kidney disease	8.88372	Known	31015462	Unique
	21	35550700	rs932282	T	C	0.193	0.074	0.013	1.63e-08	Dupuytren's disease	7.78675	Novel	37315093	Unique
	21	38611524	rs117870289	T	C	0.013	0.519	0.052	1.46e-23	Dupuytren's disease	22.8342	Known	37315093	Unique
	21	39094644	rs2836882	A	G	0.256	-0.133	0.009	2.29e-46	Inflammatory bowel disease	45.6394	Known	26974007	Unique
	22	21630090	rs3747093	A	G	0.292	0.064	0.009	3.77e-12	Inflammatory bowel disease	11.4232	Known	26974007	Unique
	22	28843169	rs7287124	G	A	0.24	0.069	0.009	1.23e-15	Pancreas fibrosis	14.9098	Known	38806679	Unique
	22	29464823	rs117765870	A	G	0.033	0.29	0.049	3.85e-09	Dupuytren's disease	8.41465	Novel	37315093	Unique
	22	30174033	rs1003342	A	G	0.504	0.059	0.008	1.30e-13	Inflammatory bowel disease	12.8844	Known	26974007	Unique
	22	36308504	rs4820227	A	C	0.968	-0.085	0.011	2.39e-14	Chronic kidney disease	13.6218	Known	26305897	Unique
	22	37066896	rs855791	A	G	0.44	0.041	0.007	5.65e-10	Myocardial fibrosis	9.24827	Known	38806679	Unique
	22	37073152	rs6000553	A	G	0.465	0.093	0.007	2.45e-36	Liver fibrosis	35.6107	Known	38806679	Unique
	22	39266475	rs9611131	T	C	0.876	0.127	0.012	5.71e-26	Inflammatory bowel disease	25.2434	Known	26974007	Unique
	22	40559560	rs5758007	T	A	0.488	0.048	0.007	6.39e-12	Carpal tunnel syndrome	11.1945	Known	35332129	Unique
	22	41383967	rs767593	T	G	0.233	0.056	0.01	4.21e-09	Inflammatory bowel disease	8.37561	Known	22936669	Unique
	22	41825842	rs41277466	T	C	0.078	-0.073	0.012	1.11e-09	Carpal tunnel syndrome	8.95468	Known	35332129	Unique
	22	42716955	rs738527	T	C	0.26	-0.044	0.005	9.77e-19	Chronic kidney disease	18.0099	Known	35710981	Unique
	22	43928847	rs738409	G	C	0.214	0.096	0.009	6.89e-27	Liver fibrosis	26.1618	Known	38806679	Unique
	22	43928850	rs738408	T	C	0.222	0.418	0.008	1.00e-648	Cirrhosis	648	Known	31815349	Unique
	22	45970285	rs10453460	T	C	0.226	0.183	0.022	9.28e-17	Plantar fibromatosis	16.0324	Novel		Unique
	22	45971264	rs28971325	A	G	0.228	0.865	0.014	1.00e-847	Dupuytren's disease	847	Known	37315093	Duplicate
	22	45971264	rs28971325	A	G	0.23	0.314	0.024	1.32e-39	Peyronie's disease	38.8778	Known	39024449	Duplicate
	22	49919157	rs573197054	C	T	0.132	-0.069	0.012	2.79e-09	Pancreas fibrosis	8.5544	Known	38806679	Unique
	22	49960607	rs28375915	A	G	0.446	-0.05	0.009	3.57e-09	Inflammatory bowel disease	8.44709	Known	20228798	Unique

## Sheet: S3 - Novel
	Supplementary Table 3. Number of known and novel top hits across fibrotic traits
	Trait	Cases	Controls	Novel	Known	Total	Previously published
	Dupuytren's disease	31369	1172801	53	65	118	No
	Cirrhosis	45969	1966001	5	24	29	No
	Peyronie's disease	4559	772086	11	6	17	No
	Plantar fibromatosis	6381	1125632	3	0	3	No
	Trigger finger	15570	1118527	20	4	24	No
	Skin	17527	1655948	7	2	9	No
	Idiopathic pulmonary fibrosis	14004	1827648	8	16	24	No
	Phimosis	19965	919535	9	3	12	No
	Carpal tunnel syndrome	48843	1190837	0	49	49	Yes
	Pancreas fibrosis	-	-	0	18	18	Yes
	Myocardial fibrosis	-	-	0	11	11	Yes
	Liver fibrosis	-	-	0	27	27	Yes
	Renal fibrosis	-	-	0	10	10	Yes
	Heart failure	139533	1946349	0	46	46	Yes
	Chronic kidney disease	126358	1726736	6	83	89	No
	Systemic sclerosis	10341	835567	1	23	24	No
	Inflammatory bowel disease	35261	1843261	13	122	135	No
	Total			136	509	645
	Percentage			0.210853	0.789147

## Sheet: S4 - Heritability
	Supplementary Table 4. Fibrotic trait heritability and genomic inflation
	Trait	heritability	lambda_gc	intercept	intercept_se
	Meta-analysis Cirrhosis	0.044708	1.2365	1.0732	0.0197
	Meta-analysis Dupuytren	0.079187	1.1843	1.047	0.0329
	Meta-analysis IPF	0.090954	1.1207	1.0368	0.0144
	Meta-analysis Peyronie	0.224515	1.0618	1.0312	0.0068
	Meta-analysis Phimosis	0.069169	1.1082	1.0298	0.0078
	Meta-analysis Plantar Fibromatosis	0.127411	1.0772	1.0073	0.0075
	Meta-analysis Skin Fibrosis	0.033063	1.0557	1.014	0.0069
	Meta-analysis Trigger Finger	0.173152	1.2038	1.0269	0.0084
	Meta-analysis Chronic Kidney Disease	0.0702	1.31	1	0.01
	Meta-analysis Inflammatory Bowel Disease	0.105	1.17	1	0.01
	Meta-analysis Systemic sclerosis	0.05	1.08	1.02	0.01

## Sheet: S5 - Colocalization
	Supplementary Table 5. Colocalization analyses for fibrotic traits
				Trait 1				Trait 2		Shared causal variant
	CHR	BP_start	BP_end	trait1	mlogP_trait1_locus	lead_snp_h4	PP4	trait2	mlogP_trait2_locus	BETA_h4_trait1	FREQA1_h4_trait1	A0_h4_trait1	A1_h4_trait1	BETA_h4_trait2	FREQA1_h4_trait2	A0_h4_trait2	A1_h4_trait2	Direction	cs95_snps
	1	10662336	11662336	Heart failure	-7.78	rs880315	0.912823	Chronic kidney disease	-6.8	0.0252	0.3632	T	C	-0.0238	0.5958	c	t	Same	rs880315;rs34071855;rs284278;rs17035646
	1	21633261	22633261	Dupuytren's disease	-43.48	rs11802513	0.984578	Inflammatory bowel disease	-21.53	0.1934	0.1702	C	A	-0.1117	0.1056	c	a	Opposite	rs11802513;rs7524102;rs34553872;rs34568051;rs12563939;rs12751610;rs6679981;rs12568930;rs11799474
	1	55999992	56999992	Carpal tunnel syndrome	-6.17	rs10888974	0.698413	Chronic kidney disease	-10.24	0.0311013	0.2689	T	C	-0.0331	0.6431	c	t	Same	rs10888974;rs7536157;rs7532239;rs6588637;rs6664934;rs4912303;rs7516563;rs2780867;rs4554741
	1	102414362	103414362	Trigger finger	-6.02	rs4907985	0.712671	Carpal tunnel syndrome	-12.46	0.0542	0.5116	T	A	0.050503	0.4898	T	A	Same	rs4907985;rs12722976;rs1318756;rs11164653;rs2061708;rs143424888;rs7517682;rs945748;rs7543705;rs1591637;rs7521799;rs984022;rs2889351;rs12046389;rs12740738;rs1841838;rs921416;rs2616010;rs12144719;rs10047217;rs12410008;rs2622865;rs10874654;rs11164603;rs1551105;rs12406439;rs10782904;rs12045404;rs7540247;rs10782905;rs4381210
	1	149434520	150434520	Peyronie's disease	-10.75	rs11205303	0.99973	Carpal tunnel syndrome	-20.15	-0.138	0.5921	C	T	-0.0680968	0.4079	T	C	Opposite	rs11205303
	1	149434520	150434520	Trigger finger	-8.89	rs12048493	0.832427	Peyronie's disease	-10.75	0.0737	0.6334	C	A	-0.1491	0.6103	C	A	Opposite	rs12048493
	1	150216783	151216783	Idiopathic pulmonary fibrosis	-11.73	rs16837903	0.883561	Cirrhosis	-6.27	-0.1263	0.1432	G	A	-0.0472	0.1441	G	A	Same	rs16837903;rs72700870
	1	221577747	222577747	Skin	-16.17	rs7549980	0.966806	Dupuytren's disease	-13.29	0.1058	0.2865	T	A	0.0944	0.2796	T	A	Same	rs7549980
	1	234099210	235099210	Heart failure	-6.6	rs56056213	0.835036	Inflammatory bowel disease	-9.43	-0.0316	0.8104	T	C	0.0557	0.1774	c	t	Same	rs56056213;rs10910476;rs72749956;rs72749954;rs72749957;rs72749953;rs629199
	2	27029596	28029596	Cirrhosis	-32.06	rs11127048	0.997732	Inflammatory bowel disease	-9.67	-0.0686	0.5972	G	A	-0.0524	0.6309	g	a	Same	rs11127048;rs780094
	2	32688573	33688573	Trigger finger	-8.1	rs7581446	0.83874	Carpal tunnel syndrome	-12.69	-0.0719	0.502	C	T	-0.0492007	0.4766	C	T	Same	rs7581446;rs2367623;rs996103;rs60558455;rs4670928;rs6728094;rs7595240;rs1065324;rs7584473;rs17567417;rs56282338;rs62146677;rs62146678;rs12104955;rs17566780;rs996102;rs6720405;rs17641062;rs7580348;rs58920936;rs6543699;rs4670836;rs4670251;rs5006126;rs6707904;rs4670778;rs4670849;rs56988251;rs4670828;rs4670245;rs726429;rs12617948;rs12617970;rs12611549;rs4670225;rs17641180;rs60000782;rs148210465;rs467…
	2	64941066	65941066	Dupuytren's disease	-10.42	rs1437461	0.973581	Inflammatory bowel disease	-9.57	-0.0746	0.2988	C	T	0.0538	0.3003	c	t	Opposite	rs1437461;rs7562559;rs12614851;rs1344891;rs4671666;rs1437462;rs1370394;rs934731;rs2043724;rs67794735;rs11675538;rs11694714;rs11126039;rs35839762;rs11126037;rs11126038;rs6546150
	2	164151879	165151879	Cirrhosis	-7.45	rs10184004	0.99172	Chronic kidney disease	-6.56	-0.0397	0.3977	C	T	-0.0246	0.3694	c	t	Same	rs10184004;rs10195252
	2	164151879	165151879	Cirrhosis	-7.45	rs10184004	0.990534	Carpal tunnel syndrome	-6.42	-0.0397	0.3977	C	T	-0.0356997	0.4302	C	T	Same	rs10184004;rs10195252;rs13389219
	2	164151879	165151879	Carpal tunnel syndrome	-6.42	rs10184004	0.989911	Chronic kidney disease	-6.56	-0.0356997	0.4302	C	T	-0.0246	0.3694	c	t	Same	rs10184004;rs10195252;rs10601676;rs6717858
	2	216755937	217755937	Trigger finger	-15.6	rs57794967	0.76433	Carpal tunnel syndrome	-23.48	0.1357	0.8147	G	A	-0.0961035	0.1425	A	G	Same	rs57794967;rs10490758;rs57632285;rs10221933;rs2113825;rs62175239;rs12622529;rs10203066;rs10490757;rs4674138;rs56733382;rs11676136;rs62175241;rs4674139;rs11695415;rs5002640;rs12694411;rs62175240;rs12694412;rs13430869;rs60279308;rs16857158;rs11683981;rs6713558;rs4674140;rs2162000;rs1863190;rs13006493
	3	49141218	50141218	Heart failure	-8.13	rs4283605	0.849679	Inflammatory bowel disease	-47.08	0.0275	0.695	G	A	-0.1228	0.6158	g	a	Opposite	rs4283605;rs6770670;rs3197999;rs11130213;rs9858542;rs1131095;rs9822268;rs34762726;rs9823546;rs9858213;rs9882740;rs11718165;rs9812791;rs9852529;rs2172252
	3	49141218	50141218	Carpal tunnel syndrome	-8.81	rs6803222	0.822698	Heart failure	-8.13	-0.0437011	0.2905	T	G	-0.0303	0.3129	T	G	Same	rs6803222;rs9837341;rs11710037;rs11921590;rs7614725;rs9824092;rs13064576;rs1873625;rs9833611;rs9827708;rs9875617;rs34427167;rs9811982;rs11713474;rs71324979;rs35999162;rs9858280;rs11926781;rs9837027;rs11720597;rs3811697;rs11130203;rs4625;rs7633271;rs9836291;rs1801143;rs1131095;rs34762726;rs67485053;rs11706370;rs11715915;rs2172252;rs9858418;rs9858213;rs11718165;rs9858542;rs6766581;rs4283605;rs11130…
	3	71045686	72045686	Heart failure	-6.27	rs62247166	0.716757	Chronic kidney disease	-7.67	0.0248	0.5271	T	C	-0.0249	0.4781	c	t	Same	rs62247166;rs6805189;rs35483362;rs35540156;rs34264449;rs9828629;rs9854068;rs9853632;rs13068294;rs11715828;rs17108;rs9853081;rs9878602;rs9836630;rs35967223;rs11719972;rs11708920;rs13327339;rs13060421;rs36023390
	4	7413825	8413825	Peyronie's disease	-6.96	rs6850654	0.766499	Dupuytren's disease	-20.89	-0.0987	0.4395	G	C	-0.1019	0.3978	G	C	Same	rs6850654;rs55844411;rs17832709;rs62289337;rs28694545;rs56220381;rs34310670;rs62290561;rs6815298;rs56411722;rs6814887;rs6855532;rs7663026;rs17770213;rs34033399;rs28600706;rs6829680;rs61742221;rs28437157;rs62289333;rs7687428;rs62289335;rs28375300;rs7680747;rs62289339;rs62290571;rs28622214;rs62289336;rs62290573;rs28558196;rs73214042;rs62289340;rs62290574;rs62289338;rs28417050;rs6816389;rs28438948;r…
	4	101767552	102767552	Renal fibrosis	-161.79	rs13107325	1	Liver fibrosis	-239.44	0.422819	0.0655	C	T	0.474234	0.0655	C	T	Same	rs13107325
	4	101767552	102767552	Renal fibrosis	-161.79	rs13107325	1	Pancreas fibrosis	-32.61	0.422819	0.0655	C	T	0.173624	0.0655	C	T	Same	rs13107325
	4	101767552	102767552	Liver fibrosis	-239.44	rs13107325	1	Pancreas fibrosis	-32.61	0.474234	0.0655	C	T	0.173624	0.0655	C	T	Same	rs13107325
	4	101767552	102767552	Liver fibrosis	-239.44	rs13107325	0.992215	Heart failure	-6.36	0.474234	0.0655	C	T	-0.0494	0.9344	T	C	Same	rs13107325
	4	101767552	102767552	Pancreas fibrosis	-32.61	rs13107325	0.992214	Heart failure	-6.36	0.173624	0.0655	C	T	-0.0494	0.9344	T	C	Same	rs13107325
	4	101767552	102767552	Renal fibrosis	-161.79	rs13107325	0.992214	Heart failure	-6.36	0.422819	0.0655	C	T	-0.0494	0.9344	T	C	Same	rs13107325
	4	101767552	102767552	Renal fibrosis	-161.79	rs13107325	0.988093	Inflammatory bowel disease	-7.05	0.422819	0.0655	C	T	0.0921	0.0218	c	t	Same	rs13107325
	4	101767552	102767552	Liver fibrosis	-239.44	rs13107325	0.988093	Inflammatory bowel disease	-7.05	0.474234	0.0655	C	T	0.0921	0.0218	c	t	Same	rs13107325
	4	101767552	102767552	Pancreas fibrosis	-32.61	rs13107325	0.988092	Inflammatory bowel disease	-7.05	0.173624	0.0655	C	T	0.0921	0.0218	c	t	Same	rs13107325
	4	101767552	102767552	Dupuytren's disease	-6.79	rs223486	0.969172	Cirrhosis	-6.97	0.0519	0.5142	G	C	0.0381	0.5325	G	C	Same	rs223486;rs223481;rs223482;rs223485;rs223480
	4	101767552	102767552	Heart failure	-6.36	rs13107325	0.94384	Inflammatory bowel disease	-7.05	-0.0494	0.9344	T	C	0.0921	0.0218	c	t	Same	rs13107325;rs13135092;rs35225200
	4	102444814	103444814	Renal fibrosis	-66.31	rs34890146	0.998459	Liver fibrosis	-107.16	0.253746	0.075	A	T	0.299579	0.075	A	T	Same	rs34890146
	4	102444814	103444814	Liver fibrosis	-107.16	rs34890146	0.993453	Pancreas fibrosis	-14.69	0.299579	0.075	A	T	0.106518	0.075	A	T	Same	rs34890146
	4	102444814	103444814	Renal fibrosis	-66.31	rs34890146	0.992424	Pancreas fibrosis	-14.69	0.253746	0.075	A	T	0.106518	0.075	A	T	Same	rs34890146;rs531685993;rs13129951;rs13107511
	4	113007558	114007558	Myocardial fibrosis	-8.84	rs11098193	0.977348	Heart failure	-9.33	0.044411	0.2346	C	T	-0.0336	0.7425	T	C	Same	rs11098193;rs55754224;rs6829664;rs4834347;rs6816233;rs11938486;rs17531033;rs17620390;rs35132791;rs13102179;rs191563103
	5	97930152	98930152	Peyronie's disease	-12.18	rs1037599	0.714268	Carpal tunnel syndrome	-9.63	0.1533	0.5321	G	T	0.040998	0.4815	T	G	Opposite	rs1037599;rs11241450;rs1037598;rs11949814;rs2085231;rs1840496
	6	34998009	35998009	Idiopathic pulmonary fibrosis	-7.36	rs2064319	0.991296	Dupuytren's disease	-13.04	-0.0727	0.3958	G	A	0.079	0.3951	G	A	Opposite	rs2064319;rs2064317
	7	37446454	38446454	Dupuytren's disease	-378.88	rs2122625	0.978066	Plantar fibromatosis	-19.51	-0.5846	0.8775	G	T	-0.2345	0.8664	G	T	Same	rs2122625;rs2290223;rs117575966;rs117329120;rs2044830;rs17171240;rs74335252;rs117402009;rs17171229;rs2290221;rs16879765;rs17171238;rs145159117;rs2122620;rs114929416;rs117387543;rs10085558;rs79590116;rs75182114
	7	116767325	117767325	Peyronie's disease	-57.62	rs38916	0.908983	Dupuytren's disease	-22.99	-0.3582	0.473	G	A	-0.1339	0.4727	G	A	Same	rs38916;rs11981089;rs10226248;rs6950776;rs34911130;rs6951125;rs4727845;rs12706147;rs12706145;rs9691008;rs38909;rs9692365;rs887573
	7	128330784	129330784	Idiopathic pulmonary fibrosis	-6.03	rs35188261	0.903509	Systemic sclerosis	-27.9	0.0815	0.1193	G	A	0.3274	0.1301	g	a	Same	rs35188261;rs13238352;rs34871361;rs12539476;rs34381587;rs36073657;rs34725944;rs35234849;rs13236009;rs12536266;rs12706861;rs12534421;rs17339836;rs17338998
	7	150345427	151345427	Heart failure	-7.39	rs3918226	0.999768	Chronic kidney disease	-11.56	-0.0483	0.919	T	C	0.0663	0.0717	c	t	Same	rs3918226
	8	23390907	24390907	Renal fibrosis	-6.05	rs36071802	0.968115	Chronic kidney disease	-7.87	-0.0406065	0.4231	T	C	-0.0263	0.5477	c	t	Opposite	rs36071802;rs4871905;rs10109414;rs34861762;rs6999484;rs11778129;rs3758086;rs9314273
	9	21594331	22594331	Dupuytren's disease	-6.26	rs7859727	0.943637	Heart failure	-18.23	-0.05	0.48	C	T	-0.0427	0.5295	T	C	Opposite	rs7859727;rs10757277;rs1537373;rs2891168;rs4977574;rs10757279;rs10757278;rs1537371;rs1333049;rs4977575;rs7857118;rs10757274;rs1333047;rs10738610;rs4977757;rs1333042;rs1537375
	9	91802480	92802480	Dupuytren's disease	-13.41	rs2236341	0.868898	Carpal tunnel syndrome	-8.11	-0.0848	0.3323	C	T	0.040998	0.3396	C	T	Opposite	rs2236341;rs10820965;rs10123342;rs2273862;rs6479418;rs10820961;rs11792342;rs1121979;rs2295941;rs2761681;rs10761150;rs2516568;rs7043152;rs3758229;rs7027595;rs10820960;rs10115222;rs10992319;rs10125474;rs7024190;rs9299403;rs10761151;rs7848055;rs7042335;rs10120980;rs7867909;rs10739928;rs10992303;rs10992273;rs2151618;rs7040949;rs10761147;rs10820986;rs10120329;rs4302908;rs10820988;rs10820990;rs7869742;…
	9	113871911	114871911	Idiopathic pulmonary fibrosis	-6.32	rs4372078	0.891474	Inflammatory bowel disease	-18.64	0.0656	0.2984	G	T	-0.0806	0.2655	g	t	Opposite	rs4372078;rs6478109;rs7848647
	9	132764504	133764504	Pancreas fibrosis	-18.18	rs635634	0.995721	Heart failure	-14.94	0.0713256	0.1955	C	T	-0.0466	0.8068	T	C	Same	rs635634
	9	132764504	133764504	Liver fibrosis	-14.02	rs879055593	0.799129	Pancreas fibrosis	-18.18	0.0619906	0.2766	C	T	0.0744771	0.2766	C	T	Same	rs879055593
	10	4161075	5161075	Peyronie's disease	-12.39	rs138746166	0.945371	Carpal tunnel syndrome	-12.13	-0.3114	0.1161	GGA	G	0.0746992	0.1132	GGA	G	Opposite	rs138746166;rs12764498;rs67362530;rs35056421;rs35424490;rs35464459;rs5011019;rs66885174;rs34724070;rs78836001;rs34420413;rs34505389;rs7921185;rs4397735;rs7922153;rs35016422;rs36000835;rs4382804;rs4628584;rs4418707;rs12774134;rs67466576;rs36096746;rs56279605;rs35468197;rs68005215;rs41305661;rs4341440;rs5782792;rs34072915;rs34702521;rs35231678;rs7908994;rs66624122;rs34373625;rs59428599;rs4531365;rs…
	10	29939321	30939321	Trigger finger	-6.11	rs57822625	0.860522	Carpal tunnel syndrome	-9.6	0.0741	0.1393	C	T	0.0641009	0.1458	C	T	Same	rs57822625;rs61275121;rs58672332;rs10826872;rs12244105;rs55788737;rs11008275;rs73247359;rs60360796;rs1538955;rs58893654;rs11008274;rs1340950;rs10826873
	10	30317960	31317960	Trigger finger	-7.32	rs57718262	0.993687	Dupuytren's disease	-6.11	-0.0894	0.1872	G	T	-0.0677	0.182	G	T	Same	rs57718262
	10	30317960	31317960	Dupuytren's disease	-6.11	rs57822625	0.794165	Carpal tunnel syndrome	-9.6	0.0621	0.1594	C	T	0.0641009	0.1458	C	T	Same	rs57822625;rs10826872;rs12244105;rs10826873;rs58672332;rs55788737;rs73247359;rs1538955;rs11008275;rs11008274;rs1340950;rs60360796;rs58893654
	10	58017155	59017155	Renal fibrosis	-7.34	rs1649061	0.814892	Chronic kidney disease	-18.73	-0.0429336	0.5317	A	G	0.0432	0.4658	g	a	Same	rs1649061;rs7098329;rs28807822;rs7098326;rs28769024;rs149675351;rs12248958;rs1649032;rs1427223;rs1427222;rs1658457;rs1649027;rs1658494;rs1427196;rs1649030;rs1658492;rs1658496;rs1896245;rs1632584;rs1365741;rs1658491;rs2170779;rs1365740;rs1649031;rs1896246;rs1649026;rs1658493;rs7094882;rs1427195;rs7074778;rs1658453;rs1649024;rs1630150;rs28855176;rs111353521;rs1649045;rs1649028;rs1658456;rs7393810;r…
	10	92170150	93170150	Inflammatory bowel disease	-9.68	rs11187149	0.920624	Chronic kidney disease	-7.04	0.0495	0.3887	g	a	-0.0269	0.3917	g	a	Opposite	rs11187149;rs4933736;rs1112718;rs11187143;rs7898054;rs7923866;rs1832886;rs10748582;rs10882106;rs10882104;rs11187144;rs11187140;rs7087591;rs10786053;rs11187141;rs34744311;rs10882105;rs9420589;rs2497304;rs12219514;rs9419741;rs11187129;rs61862778
	10	97686463	98686463	Carpal tunnel syndrome	-17.31	rs55917128	0.85729	Chronic kidney disease	-9.94	-0.0586996	0.4372	T	C	0.0305	0.563	c	t	Same	rs55917128;rs1325494;rs1983865;rs10786405;rs1983867;rs10786401;rs2015972;rs10748719;rs4919190;rs10736126;rs3750595;rs10748721;rs7899632;rs7077073;rs11189523;rs3750596;rs10736122;rs6584172;rs4277045;rs4604804;rs7084747;rs4919182;rs9420722;rs7090035
	10	112498590	113498590	Cirrhosis	-7.29	rs7903146	0.89768	Chronic kidney disease	-37.7	-0.0361	0.286	C	T	0.0659	0.2086	c	t	Opposite	rs7903146
	11	61311991	62311991	Liver fibrosis	-7.51	rs3834458	0.972456	Inflammatory bowel disease	-8.33	0.0425722	0.355	CT	C	-0.0486	0.6067	c	ct	Same	rs3834458;rs174568;rs174554;rs174547;rs174553;rs5792235;rs174564;rs174562;rs174550;rs174546;rs174536;rs1535;rs174551;rs174535;rs102274;rs174567;rs102275;rs174533
	11	88784793	89784793	Trigger finger	-9.65	rs2289124	0.989423	Carpal tunnel syndrome	-8.43	-0.1142	0.1516	G	A	-0.0551005	0.1465	G	A	Same	rs2289124
	12	110876351	111876351	Phimosis	-8.37	rs597808	0.995801	Heart failure	-11.19	0.0608	0.4571	G	A	0.0356	0.4694	G	A	Same	rs597808;rs653178
	12	110876351	111876351	Heart failure	-11.19	rs597808	0.994199	Chronic kidney disease	-10.42	0.0356	0.4694	G	A	0.031	0.427	g	a	Same	rs597808;rs653178
	12	110876351	111876351	Idiopathic pulmonary fibrosis	-6.97	rs3184504	0.993478	Phimosis	-8.37	0.0894	0.4951	C	T	0.0607	0.4533	C	T	Same	rs3184504;rs7137828;rs653178;rs7310615
	12	110876351	111876351	Phimosis	-8.37	rs597808	0.993221	Chronic kidney disease	-10.42	0.0608	0.4571	G	A	0.031	0.427	g	a	Same	rs597808;rs7137828;rs653178;rs3184504;rs7310615
	12	110876351	111876351	Idiopathic pulmonary fibrosis	-6.97	rs3184504	0.991733	Chronic kidney disease	-10.42	0.0894	0.4951	C	T	0.0309	0.4219	c	t	Same	rs3184504;rs7137828;rs653178;rs35350651;rs597808;rs4766578
	12	110876351	111876351	Idiopathic pulmonary fibrosis	-6.97	rs597808	0.983892	Heart failure	-11.19	0.0662	0.4851	G	A	0.0356	0.4694	G	A	Same	rs597808;rs3184504;rs653178
	12	110876351	111876351	Heart failure	-11.19	rs597808	0.980957	Inflammatory bowel disease	-8.21	0.0356	0.4694	G	A	0.0447	0.4372	g	a	Same	rs597808;rs2013002;rs11065979;rs653178;rs11065987;rs11065991
	12	110876351	111876351	Idiopathic pulmonary fibrosis	-6.97	rs3184504	0.97521	Inflammatory bowel disease	-8.21	0.0894	0.4951	C	T	0.0445	0.4324	c	t	Same	rs3184504;rs7137828;rs7310615;rs35350651;rs11065979;rs653178;rs11065991;rs597808;rs11065987;rs4766578
	12	110876351	111876351	Inflammatory bowel disease	-8.21	rs597808	0.972843	Chronic kidney disease	-10.42	0.0447	0.4372	g	a	0.031	0.427	g	a	Same	rs597808;rs7137828;rs653178;rs3184504;rs4766578;rs35350651;rs10774625;rs7310615;rs11065979
	12	110876351	111876351	Phimosis	-8.37	rs597808	0.972833	Inflammatory bowel disease	-8.21	0.0608	0.4571	G	A	0.0447	0.4372	g	a	Same	rs597808;rs7137828;rs3184504;rs653178;rs7310615;rs35350651
	12	110876351	111876351	Cirrhosis	-7.64	rs4766578	0.783395	Chronic kidney disease	-10.42	-0.0352	0.503	T	A	-0.0304	0.5579	t	a	Same	rs4766578;rs10774625;rs3184504;rs7137828;rs597808;rs653178
	12	110876351	111876351	Idiopathic pulmonary fibrosis	-6.97	rs3184504	0.751976	Cirrhosis	-7.64	0.0894	0.4951	C	T	0.0336	0.4836	C	T	Same	rs3184504;rs4766578;rs7137828;rs10774625;rs653178;rs7310615
	12	110876351	111876351	Phimosis	-8.37	rs3184504	0.741155	Cirrhosis	-7.64	0.0607	0.4533	C	T	0.0336	0.4836	C	T	Same	rs3184504;rs597808;rs7137828;rs653178;rs7310615;rs10774625
	12	110876351	111876351	Cirrhosis	-7.64	rs597808	0.717125	Heart failure	-11.19	0.0334	0.4869	G	A	0.0356	0.4694	G	A	Same	rs597808;rs10774625;rs4766578;rs653178
	12	120505313	121505313	Cirrhosis	-9.09	rs1169314	0.87809	Heart failure	-6.22	-0.0494	0.6995	G	A	-0.026	0.6997	G	A	Same	rs1169314;rs1169300;rs1169301;rs2464196;rs2264750;rs2257764;rs1169315;rs2258287;rs1182933;rs1169281
	12	124327879	125327879	Heart failure	-6.27	rs10846744	0.921988	Chronic kidney disease	-8.63	0.0294	0.1472	G	C	0.0365	0.1641	g	c	Same	rs10846744
	13	25971802	26971802	Dupuytren's disease	-7.96	rs12864131	0.98374	Carpal tunnel syndrome	-7.27	0.0599	0.4457	G	A	0.0355023	0.4946	G	A	Same	rs12864131;rs35101488;rs11620323;rs61944841;rs7989124;rs12430676;rs4631994
	13	98852859	99852859	Phimosis	-9.35	rs9300538	0.934915	Inflammatory bowel disease	-11.86	-0.0866	0.1813	G	A	-0.0737	0.151	g	a	Same	rs9300538;rs9300539;rs34637058;rs9585037;rs34485817;rs9585038;rs9557202;rs9557205;rs9805233;rs9805153;rs12877371;rs7998034;rs12877480;rs12232061;rs71438001;rs9557168;rs35494820;rs147468362;rs9300537;rs35694871;rs8181880;rs9557194;rs9557189;rs9557176;rs9585032;rs9554577;rs3742130;rs9557178;rs9557192;rs9557210;rs9557195;rs9557207;rs3181718;rs9554559;rs1927729;rs9554587;rs34647286;rs11620194;rs95571…
	14	22343385	23343385	Peyronie's disease	-12.27	rs1042704	0.999985	Dupuytren's disease	-42.17	0.1785	0.2095	G	A	0.171	0.1967	G	A	Same	rs1042704
	14	23590950	24590950	Renal fibrosis	-17.74	rs79873985	0.999902	Liver fibrosis	-25.87	0.288971	0.0136	A	G	0.325206	0.0136	A	G	Same	rs79873985
	14	75279563	76279563	Trigger finger	-14.99	rs72725608	0.999993	Carpal tunnel syndrome	-11.4	-0.2323	0.9578	C	T	0.118103	0.0449	T	C	Same	rs72725608
	14	93878610	94878610	Cirrhosis	-55.96	rs28929474	0.998351	Carpal tunnel syndrome	-23.92	0.3531	0.0195	C	T	-0.270497	0.0265	C	T	Opposite	rs28929474
	15	75071574	76071574	Systemic sclerosis	-7.34	rs12148488	0.989243	Inflammatory bowel disease	-8.47	-0.108	0.4885	g	t	-0.0471	0.5567	g	t	Same	rs12148488;rs6495151
	15	80175204	81175204	Heart failure	-6.28	rs7174222	0.965112	Chronic kidney disease	-6.39	-0.0238	0.5368	T	C	0.0241	0.4146	c	t	Same	rs7174222;rs4778848;rs7174038;rs11634851;rs7174250;rs2627321;rs4630510;rs11638879;rs2627323;rs2627316;rs34887414;rs2759309;rs2627308;rs2627322;rs2627324;rs2759308
	15	85169635	86169635	Dupuytren's disease	-12.21	rs12904047	0.806208	Heart failure	-6.51	-0.0841	0.753	G	A	0.0249	0.7277	G	A	Opposite	rs12904047;rs11632750;rs10520598;rs67253156;rs12904807;rs62023931;rs2344440;rs1157519;rs11638278;rs12906580;rs745191;rs12898964;rs10520592;rs11634707;rs1871285;rs11630968;rs1382534;rs56382304;rs11630112;rs4843086;rs55740125;rs4843082;rs4843089;rs11629510;rs11631660;rs4843085;rs11631018;rs1382538;rs4843081;rs11631449;rs36044792;rs11635190;rs11633893;rs11631386;rs17635450;rs12907126;rs17570529;rs20…
	16	53268073	54268073	Heart failure	-18.86	rs62048402	0.880162	Chronic kidney disease	-28.04	0.0423	0.4189	G	A	0.0533	0.4179	g	a	Same	rs62048402;rs56094641;rs1558902;rs11642015;rs1421085
	16	53268073	54268073	Carpal tunnel syndrome	-14.3	rs62048402	0.873817	Chronic kidney disease	-28.04	0.0530003	0.4164	G	A	0.0533	0.4179	g	a	Same	rs62048402;rs1421085;rs1558902;rs56094641;rs11642015
	16	53268073	54268073	Phimosis	-9.28	rs9923544	0.872931	Carpal tunnel syndrome	-14.3	0.0605	0.4293	C	T	0.0546018	0.438	C	T	Same	rs9923544;rs9930333;rs9940646;rs1558901;rs9939973;rs9930397;rs9940278;rs9940128;rs9923147;rs1421086;rs1121980;rs57292959;rs9928094;rs28562191;rs9937354;rs9937521;rs9937053
	16	53268073	54268073	Phimosis	-9.28	rs7193144	0.867457	Heart failure	-18.86	-0.0607	0.5984	C	T	0.0421	0.408	T	C	Same	rs7193144;rs17817449;rs8050136;rs8043757;rs9935401;rs8063057;rs8051591;rs9936385;rs62033399;rs7202116;rs9923233;rs3751814;rs56313538;rs9939609;rs62033404;rs9926289;rs7206410;rs9923312;rs11075989
	16	53268073	54268073	Trigger finger	-22.61	rs67386617	0.861054	Dupuytren's disease	-6.9	0.1239	0.4362	G	A	0.0477	0.4085	G	A	Same	rs67386617;rs11076004;rs7188247
	16	89224871	90224871	Trigger finger	-6.35	rs1126464	0.907049	Carpal tunnel syndrome	-6.5	-0.0632	0.2794	G	C	-0.0408012	0.2487	G	C	Same	rs1126464;rs164749;rs11428568;rs352939;rs460879;rs2115401;rs908951;rs420332;rs2434858;rs4785581;rs2250598;rs4785580;rs154657;rs164748;rs164747;rs154656;rs396742;rs258317;rs645019;rs2434872;rs407863;rs258323;rs7187910;rs258321;rs258341;rs258332;rs397891;rs467357;rs464873
	17	1652006	2652006	Trigger finger	-9.64	rs1675698	0.70763	Heart failure	-7.25	0.0743	0.3518	C	A	0.0319	0.3557	C	A	Same	rs1675698;rs12941621;rs4523957;rs4548913;rs216188;rs216179;rs216178;rs216206;rs216190;rs432200;rs216180;rs216176;rs216204;rs216189;rs422632;rs216183;rs11078024;rs452363;rs441750;rs410378;rs404392;rs12938295;rs12943566;rs177567;rs216202;rs395566;rs216201;rs170044;rs9906500;rs216198;rs216203;rs1002135;rs394752;rs403553;rs375245;rs12603592;rs216217;rs35691028;rs170045;rs12949991;rs216220;rs216223;rs…
	17	39256124	40256124	Heart failure	-8.31	rs2952144	0.97666	Systemic sclerosis	-8.11	-0.0273	0.5242	T	C	-0.1092	0.4695	c	t	Opposite	rs2952144
	17	46431204	47431204	Idiopathic pulmonary fibrosis	-18	rs199528	0.962669	Dupuytren's disease	-6.11	-0.144	0.1898	C	T	-0.0681	0.1681	C	T	Same	rs199528;rs1378358;rs199533;rs199535;rs199445;rs199448;rs199447;rs199451;rs199534;rs199439;rs169201;rs199456
	17	78312691	79312691	Heart failure	-6.94	rs2306527	0.864693	Chronic kidney disease	-8.58	0.0274	0.467	T	C	-0.0255	0.597	c	t	Same	rs2306527;rs8076588;rs1057040;rs62075585;rs7224711;rs922838;rs11077397;rs12604076;rs2306526;rs11658134;rs7218899;rs55779573;rs2377000;rs11656742;rs10512617;rs8073626;rs2376828;rs11657403;rs1044486;rs17657767;rs62075587;rs1110274;rs6501243;rs867596;rs62075567;rs11655064;rs62074536;rs7218647;rs1531798;rs7502213;rs17736494
	18	78896103	79896103	Carpal tunnel syndrome	-8.12	rs8096658	0.981804	Chronic kidney disease	-21.75	-0.0385018	0.4978	C	G	-0.0474	0.5466	g	c	Opposite	rs8096658
	19	18768740	19768740	Liver fibrosis	-14.34	rs58542926	0.997969	Cirrhosis	-156.32	0.108946	0.0689	C	T	0.3155	0.0751	C	T	Same	rs58542926
	19	48203205	49203205	Liver fibrosis	-10.31	rs2548458	0.962512	Pancreas fibrosis	-21.77	-0.0472116	0.5323	T	C	-0.0726052	0.5323	T	C	Same	rs2548458;rs681343;rs492602;rs601338;rs516316;rs516246;rs679574;rs485186;rs2638280;rs602662;rs571689;rs570794;rs569970;rs506897;rs504963;rs507855;rs503279;rs507766
	19	48203205	49203205	Cirrhosis	-11.58	rs838133	0.904158	Chronic kidney disease	-6.42	0.0523	0.4374	G	A	0.024	0.3858	g	a	Same	rs838133
	21	14910764	15910764	Inflammatory bowel disease	-28.45	rs6517422	0.818781	Chronic kidney disease	-15.56	-0.0993	0.2511	g	a	0.0423	0.2472	g	a	Opposite	rs6517422;rs2823256;rs2242821;rs34628678;rs6517423;rs7279911;rs2823258;rs34728090;rs55673812;rs2242822;rs2823257;rs2403964;rs13050889;rs2823271;rs2403965;rs2242825;rs2823267;rs7280262;rs7280199;rs2823266;rs2242828;rs2242829;rs62218375;rs2243315;rs7282503;rs13047277;rs2242824;rs7280188;rs2823260;rs2823264;rs13050104;rs2823265;rs11908895;rs2823261;rs2823270
	22	36566896	37566896	Renal fibrosis	-6.89	rs6000553	0.995287	Liver fibrosis	-35.61	0.0423887	0.4303	G	A	0.0933546	0.4303	G	A	Same	rs6000553;rs2076085;rs2072860
	22	36566896	37566896	Renal fibrosis	-6.89	rs855791	0.971316	Myocardial fibrosis	-9.25	0.0391567	0.3663	G	A	0.0413006	0.3663	G	A	Same	rs855791
	22	36566896	37566896	Liver fibrosis	-35.61	rs6000553	0.83209	Myocardial fibrosis	-9.25	0.0933546	0.4303	G	A	0.0356299	0.4303	G	A	Same	rs6000553;rs2076085;rs4820268
	22	43428847	44428847	Liver fibrosis	-26.16	rs738409	0.945248	Cirrhosis	-647.15	0.0958325	0.2246	C	G	-0.4153	0.776	G	C	Same	rs738409;rs738408
	22	45470285	46470285	Peyronie's disease	-38.88	rs10453460	0.981251	Plantar fibromatosis	-16.03	0.3023	0.2476	C	T	0.1833	0.2262	C	T	Same	rs10453460;rs28971325
	22	45470285	46470285	Dupuytren's disease	-846.17	rs10453460	0.974014	Plantar fibromatosis	-16.03	0.8127	0.2608	C	T	0.1833	0.2262	C	T	Same	rs10453460;rs62228062
	22	45470285	46470285	Peyronie's disease	-38.88	rs28971325	0.971344	Dupuytren's disease	-846.17	0.3136	0.2296	G	A	0.8648	0.2283	G	A	Same	rs28971325;rs62228068;rs10453460

## Sheet: S6 - Variant consequence
	Supplementary Table 6. Variant consequence
	CHR	BP	SNP	Trait	Func.refGeneWithVer	ExonicFunc.refGeneWithVer
	1	1327586	rs307349	Inflammatory bowel disease	exonic	synonymous SNV
	1	2455297	rs35608674	Cirrhosis	intergenic	.
	1	8108857	rs4325151	Inflammatory bowel disease	intergenic	.
	1	10640391	rs2128416	Chronic kidney disease	intronic	.
	1	10730479	rs284278	Heart failure	intronic	.
	1	11162336	rs7553827	Dupuytren's disease	intronic	.
	1	15586228	rs10157011	Renal fibrosis	intergenic	.
	1	15986677	rs3961710	Heart failure	intergenic	.
	1	16428690	rs2086382165	Renal fibrosis	.	.
	1	19845021	rs10737481	Inflammatory bowel disease	intergenic	.
	1	22133261	rs4655025	Carpal tunnel syndrome	intronic	.
	1	22371954	rs7524102	Inflammatory bowel disease	intergenic	.
	1	22384384	rs34963268	Dupuytren's disease	intergenic	.
	1	41972525	rs591088	Heart failure	intergenic	.
	1	50642739	rs35004807	Pancreas fibrosis	intronic	.
	1	50883991	rs149288352	Heart failure	intronic	.
	1	55257768	rs2802861	Chronic kidney disease	intergenic	.
	1	56499992	rs9970807	Heart failure	intronic	.
	1	61421219	rs2474370	Heart failure	intronic	.
	1	67242007	rs11581607	Inflammatory bowel disease	intronic	.
	1	67348757	rs3790566	Systemic sclerosis	intronic	.
	1	77984833	rs34517439	Heart failure	intronic	.
	1	102914362	rs3753841	Carpal tunnel syndrome	exonic	synonymous SNV
	1	109274968	rs12740374	Heart failure	UTR3	.
	1	118553782	rs2360019	Trigger finger	intergenic	.
	1	119982857	rs116062645	Inflammatory bowel disease	intronic	.
	1	149934520	rs11205303	Carpal tunnel syndrome	exonic	nonsynonymous SNV
	1	149955122	rs12048493	Peyronie's disease	intronic	.
	1	149969301	rs12023748	Trigger finger	intronic	.
	1	150094433	rs11577346	Dupuytren's disease	intronic	.
	1	150716783	rs372839783	Idiopathic pulmonary fibrosis	.	.
	1	151820698	rs11204894	Inflammatory bowel disease	intronic	.
	1	155060832	rs11589479	Inflammatory bowel disease	exonic	synonymous SNV
	1	155179017	rs11264341	Idiopathic pulmonary fibrosis	intronic	.
	1	155320440	rs41314549	Carpal tunnel syndrome	exonic	nonsynonymous SNV
	1	156234862	rs2842873	Chronic kidney disease	intronic	.
	1	159830120	rs34687326	Inflammatory bowel disease	exonic	nonsynonymous SNV
	1	161509955	rs1801274	Inflammatory bowel disease	exonic	synonymous SNV
	1	162651183	rs61810412	Dupuytren's disease	intronic	.
	1	163629505	rs4656402	Chronic kidney disease	intergenic	.
	1	167451188	rs2056626	Systemic sclerosis	intronic	.
	1	168840198	rs114687274	Heart failure	intergenic	.
	1	169681606	rs7543304	Inflammatory bowel disease	intergenic	.
	1	170432945	rs1576975	Dupuytren's disease	intergenic	.
	1	173362623	rs7528321	Systemic sclerosis	ncRNA_intronic	.
	1	180939925	rs1609829	Chronic kidney disease	intronic	.
	1	186763997	rs988905	Chronic kidney disease	intergenic	.
	1	186793684	rs16825915	Inflammatory bowel disease	intergenic	.
	1	197735587	rs17641524	Inflammatory bowel disease	exonic	synonymous SNV
	1	200908434	rs7554511	Inflammatory bowel disease	intronic	.
	1	201468704	rs35383942	skin	exonic	nonsynonymous SNV
	1	205790067	rs1772159	Pancreas fibrosis	UTR3	.
	1	206430185	rs2297539	Dupuytren's disease	exonic	synonymous SNV
	1	206766559	rs3024505	Inflammatory bowel disease	intergenic	.
	1	213654720	rs7555143	Pancreas fibrosis	intergenic	.
	1	214435361	rs4655345	Dupuytren's disease	intronic	.
	1	219927155	rs759359281	Liver fibrosis	.	.
	1	220796686	rs2642438	Cirrhosis	exonic	synonymous SNV
	1	220800832	rs12046182	Liver fibrosis	intronic	.
	1	222077747	rs10863683	skin	intergenic	.
	1	222095156	rs7549980	Dupuytren's disease	intergenic	.
	1	226754854	rs835672	Inflammatory bowel disease	intergenic	.
	1	227780237	rs10916207	Carpal tunnel syndrome	intronic	.
	1	234599210	rs10910476	Inflammatory bowel disease	intergenic	.
	1	243336442	rs2783968	Chronic kidney disease	intronic	.
	2	652565	rs7570993	Heart failure	intergenic	.
	2	11899552	rs17605696	Dupuytren's disease	intergenic	.
	2	15642347	rs807624	Chronic kidney disease	intergenic	.
	2	25265950	rs7578575	Inflammatory bowel disease	intronic	.
	2	27529596	rs11127048	Cirrhosis	intergenic	.
	2	28195164	rs6712705	Dupuytren's disease	ncRNA_intronic	.
	2	28404762	rs11127150	Inflammatory bowel disease	intronic	.
	2	33188573	rs6712473	Carpal tunnel syndrome	intronic	.
	2	33203281	rs996102	Trigger finger	intronic	.
	2	36922355	rs11124554	Heart failure	intronic	.
	2	43621796	rs55921927	Inflammatory bowel disease	intergenic	.
	2	43854488	rs4076834	Heart failure	intronic	.
	2	55869757	rs3791679	Carpal tunnel syndrome	intronic	.
	2	58723228	rs17615494	Chronic kidney disease	ncRNA_intronic	.
	2	59934022	rs17328524	Carpal tunnel syndrome	intergenic	.
	2	60410521	rs10445937	Chronic kidney disease	intergenic	.
	2	60977506	rs7608697	Inflammatory bowel disease	intronic	.
	2	61572440	rs113774595	Cirrhosis	intergenic	.
	2	64678048	rs34532102	Chronic kidney disease	intergenic	.
	2	65441066	rs67794735	Dupuytren's disease	intergenic	.
	2	65452578	rs1437461	Inflammatory bowel disease	intergenic	.
	2	69061076	rs56885830	Dupuytren's disease	intronic	.
	2	73610624	rs6546856	Chronic kidney disease	downstream	.
	2	102368211	rs1882348	Inflammatory bowel disease	intronic	.
	2	111049726	rs3827538	Phimosis	intronic	.
	2	111074216	rs58055674	Inflammatory bowel disease	intronic	.
	2	119749849	rs10174596	Dupuytren's disease	intergenic	.
	2	121231495	rs1078441	Chronic kidney disease	intronic	.
	2	144916508	rs2579022	Trigger finger	ncRNA_intronic	.
	2	160487551	rs7423572	Inflammatory bowel disease	intronic	.
	2	162107791	rs75166367	Chronic kidney disease	intergenic	.
	2	162254026	rs2111485	Inflammatory bowel disease	intergenic	.
	2	164651879	rs10184004	Cirrhosis	intergenic	.
	2	169155689	rs16856530	Renal fibrosis	intronic	.
	2	171052679	rs10490606	Pancreas fibrosis	intronic	.
	2	176004276	rs73978133	Carpal tunnel syndrome	intergenic	.
	2	181470026	rs13029501	Inflammatory bowel disease	intronic	.
	2	191038032	rs3821236	Systemic sclerosis	intronic	.
	2	197364216	rs788015	Phimosis	intergenic	.
	2	198933929	rs11695021	Inflammatory bowel disease	intergenic	.
	2	200306928	rs74853338	Heart failure	intronic	.
	2	202620013	rs1971740	Inflammatory bowel disease	intergenic	.
	2	203721353	rs3116488	Inflammatory bowel disease	intronic	.
	2	210675783	rs1047891	Chronic kidney disease	exonic	nonsynonymous SNV
	2	217255937	rs12622529	Trigger finger	intergenic	.
	2	217281820	rs12694411	Carpal tunnel syndrome	upstream	.
	2	218104198	rs7580751	Inflammatory bowel disease	intergenic	.
	2	221786480	rs148475840	Peyronie's disease	intergenic	.
	2	226230042	rs2203452	Chronic kidney disease	intergenic	.
	2	227805671	rs7574953	Inflammatory bowel disease	intergenic	.
	2	230268450	rs7582543	Inflammatory bowel disease	intronic	.
	2	233246005	rs2119505	Inflammatory bowel disease	intergenic	.
	2	233702448	rs17863787	Cirrhosis	intronic	.
	2	236679892	rs2720102	Inflammatory bowel disease	intergenic	.
	2	240628909	rs34236350	Inflammatory bowel disease	intronic	.
	2	240967008	rs12471544	Peyronie's disease	ncRNA_intronic	.
	2	241097382	rs2286323	Carpal tunnel syndrome	exonic	startloss
	2	241816853	rs2293764	Inflammatory bowel disease	exonic	synonymous SNV
	3	12800305	rs7650482	Heart failure	intronic	.
	3	26330633	rs79293030	Dupuytren's disease	intergenic	.
	3	44805230	rs80059929	Idiopathic pulmonary fibrosis	intronic	.
	3	45573963	rs71325072	Dupuytren's disease	intergenic	.
	3	49641218	rs4283605	Inflammatory bowel disease	intronic	.
	3	49684099	rs3197999	Heart failure	exonic	nonsynonymous SNV
	3	52791512	rs1075653	Carpal tunnel syndrome	intronic	.
	3	58145788	rs7355798	Systemic sclerosis	intronic	.
	3	61658693	rs6771875	Dupuytren's disease	intronic	.
	3	71545686	rs11719972	Chronic kidney disease	intronic	.
	3	86695486	rs9858679	Dupuytren's disease	intergenic	.
	3	119397303	rs9884090	Systemic sclerosis	intronic	.
	3	124763647	rs150512726	Carpal tunnel syndrome	.	.
	3	129493428	rs3774769	Dupuytren's disease	intronic	.
	3	136015323	rs13097267	Myocardial fibrosis	intronic	.
	3	136476945	rs1394094	Carpal tunnel syndrome	intronic	.
	3	141402972	rs2871960	Carpal tunnel syndrome	intronic	.
	3	152318513	rs1827182	Systemic sclerosis	intronic	.
	3	154204164	rs377565	Chronic kidney disease	intronic	.
	3	160015740	rs589446	Systemic sclerosis	ncRNA_intronic	.
	3	160453304	rs56394279	Chronic kidney disease	ncRNA_intronic	.
	3	169774228	rs34847803	Idiopathic pulmonary fibrosis	.	.
	3	183481729	rs7630096	Dupuytren's disease	intergenic	.
	3	186716033	rs10440056	Chronic kidney disease	intergenic	.
	3	188683070	rs6762648	Inflammatory bowel disease	intronic	.
	3	188767039	rs56098053	Dupuytren's disease	intronic	.
	3	194092961	rs7642977	Chronic kidney disease	intergenic	.
	3	196688484	rs75391517	Inflammatory bowel disease	intergenic	.
	3	197814267	rs558992709	Cirrhosis	intronic	.
	4	971991	rs11724804	Systemic sclerosis	intronic	.
	4	7913825	rs55844411	Dupuytren's disease	intronic	.
	4	8327339	rs1474313	Carpal tunnel syndrome	intergenic	.
	4	13221803	rs66525731	Carpal tunnel syndrome	intergenic	.
	4	26032408	rs9790578	Dupuytren's disease	intergenic	.
	4	38358992	rs6831206	Dupuytren's disease	intergenic	.
	4	39445984	rs71643295	Pancreas fibrosis	intronic	.
	4	53617981	rs17083205	Dupuytren's disease	intergenic	.
	4	55076156	rs7659911	Dupuytren's disease	intergenic	.
	4	80253438	rs13125101	Chronic kidney disease	intergenic	.
	4	87296626	rs13139418	Cirrhosis	intergenic	.
	4	88958045	rs1585258	Idiopathic pulmonary fibrosis	intronic	.
	4	89023238	rs10006744	Inflammatory bowel disease	intronic	.
	4	94480794	rs28502775	Heart failure	intronic	.
	4	99526964	rs7689584	Cirrhosis	intronic	.
	4	101082973	rs77161209	Renal fibrosis	intronic	.
	4	101099353	rs115064203	Liver fibrosis	intronic	.
	4	101759884	rs201081507	Liver fibrosis	intergenic	.
	4	101759884	rs201081507	Renal fibrosis	intergenic	.
	4	102267552	rs13107325	Renal fibrosis	exonic	nonsynonymous SNV
	4	102267552	rs13107325	Liver fibrosis	exonic	nonsynonymous SNV
	4	102267552	rs13107325	Pancreas fibrosis	exonic	nonsynonymous SNV
	4	102527884	rs230534	Systemic sclerosis	intronic	.
	4	102777167	rs34406062	Liver fibrosis	ncRNA_exonic	.
	4	102944814	rs4280731	Dupuytren's disease	intronic	.
	4	103242705	rs13120154	Renal fibrosis	intergenic	.
	4	103339278	rs67072524	Liver fibrosis	intergenic	.
	4	110763487	rs4833443	Heart failure	intergenic	.
	4	113507558	rs55754224	Myocardial fibrosis	intronic	.
	4	113523590	rs6816233	Heart failure	intronic	.
	4	122195707	rs55969942	Inflammatory bowel disease	intronic	.
	4	143200011	rs6839312	Chronic kidney disease	intronic	.
	4	153917282	rs997850	Dupuytren's disease	intergenic	.
	4	155679529	rs13107809	Inflammatory bowel disease	intronic	.
	4	161256326	rs2120636	Trigger finger	intergenic	.
	4	168430768	rs4692931	Dupuytren's disease	intronic	.
	4	176501911	rs365843	Myocardial fibrosis	intergenic	.
	4	185659450	rs769430224	Pancreas fibrosis	.	.
	5	692915	rs4990988	Chronic kidney disease	intronic	.
	5	1282204	rs7726159	Idiopathic pulmonary fibrosis	intronic	.
	5	10714252	rs267984	Inflammatory bowel disease	intronic	.
	5	34506738	rs11747360	Chronic kidney disease	intergenic	.
	5	38788458	rs4360064	Peyronie's disease	ncRNA_intronic	.
	5	38867630	rs395157	Inflammatory bowel disease	intronic	.
	5	39478603	rs6884555	Dupuytren's disease	intergenic	.
	5	39612423	rs10461728	Chronic kidney disease	intergenic	.
	5	40425088	rs6879489	Inflammatory bowel disease	intergenic	.
	5	54517737	rs7706939	Dupuytren's disease	upstream	.
	5	79198050	rs6453431	Chronic kidney disease	intergenic	.
	5	81017967	rs568299	Peyronie's disease	intronic	.
	5	81035624	rs187338729	Dupuytren's disease	intronic	.
	5	83519351	rs61749613	Carpal tunnel syndrome	exonic	nonsynonymous SNV
	5	98430152	rs10043462	Carpal tunnel syndrome	intergenic	.
	5	98447421	rs1037598	Peyronie's disease	intergenic	.
	5	109309144	rs7705558	Dupuytren's disease	ncRNA_intronic	.
	5	113013682	rs4705749	Chronic kidney disease	UTR3	.
	5	132271607	rs55722650	Inflammatory bowel disease	intronic	.
	5	132463934	rs3749833	Dupuytren's disease	ncRNA_intronic	.
	5	135116689	rs11948459	Inflammatory bowel disease	ncRNA_intronic	.
	5	139342610	rs113408838	Heart failure	UTR5	.
	5	143542780	rs34022217	Heart failure	intergenic	.
	5	150795397	rs73282209	Inflammatory bowel disease	intronic	.
	5	151076171	rs3792783	Systemic sclerosis	intronic	.
	5	158464870	rs2946160	Dupuytren's disease	intergenic	.
	5	159399784	rs6871626	Inflammatory bowel disease	intergenic	.
	5	169588475	rs116483731	Idiopathic pulmonary fibrosis	exonic	nonsynonymous SNV
	5	172897975	rs564349	Inflammatory bowel disease	intronic	.
	5	173242251	rs9313620	Heart failure	intergenic	.
	5	177386403	rs3812036	Chronic kidney disease	intronic	.
	6	396321	rs12203592	skin	intronic	.
	6	1975822	rs140199125	Idiopathic pulmonary fibrosis	intronic	.
	6	7106083	rs2842895	Pancreas fibrosis	intergenic	.
	6	7562999	rs2076295	Idiopathic pulmonary fibrosis	intronic	.
	6	14719479	rs1267489	Inflammatory bowel disease	intergenic	.
	6	15161013	rs73373435	Dupuytren's disease	intergenic	.
	6	20687890	rs10440833	Chronic kidney disease	intronic	.
	6	21884209	rs952579	Inflammatory bowel disease	ncRNA_intronic	.
	6	22236749	rs17204453	Dupuytren's disease	intergenic	.
	6	25075489	rs72826361	Liver fibrosis	intergenic	.
	6	25578205	rs75580845	Liver fibrosis	intronic	.
	6	26072764	rs144861591	Renal fibrosis	intergenic	.
	6	26092913	rs1800562	Liver fibrosis	exonic	nonsynonymous SNV
	6	26123274	rs115740542	Cirrhosis	intronic	.
	6	26123274	rs115740542	Myocardial fibrosis	intronic	.
	6	27033276	rs13191659	Liver fibrosis	intergenic	.
	6	27707511	rs1139226	Inflammatory bowel disease	ncRNA_exonic	.
	6	27744747	rs142175606	Liver fibrosis	intergenic	.
	6	28052287	rs74537235	Phimosis	intergenic	.
	6	28468358	rs537533038	Liver fibrosis	.	.
	6	29064485	rs3129803	Liver fibrosis	ncRNA_intronic	.
	6	29961759	rs9260707	Liver fibrosis	intergenic	.
	6	30465834	rs2524172	Liver fibrosis	intergenic	.
	6	30814428	rs886423	Dupuytren's disease	ncRNA_exonic	.
	6	31373994	rs2523517	Liver fibrosis	intergenic	.
	6	32039081	rs6467	Liver fibrosis	UTR5	.
	6	32205822	rs138753323	Inflammatory bowel disease	intronic	.
	6	32570654	rs113395139	Peyronie's disease	intergenic	.
	6	32610606	rs12662632	Phimosis	intergenic	.
	6	32636375	rs9272324	Chronic kidney disease	intergenic	.
	6	32647644	rs7745002	Dupuytren's disease	intergenic	.
	6	32648168	rs17612712	Liver fibrosis	intergenic	.
	6	32652987	rs77062257	Cirrhosis	intergenic	.
	6	32658525	rs9273364	Trigger finger	downstream	.
	6	32706034	rs141345764	Systemic sclerosis	intergenic	.
	6	33181796	rs147467236	Carpal tunnel syndrome	intronic	.
	6	34656128	rs112540634	Heart failure	intronic	.
	6	35498009	rs1051952	Dupuytren's disease	UTR3	.
	6	35509255	rs2064317	Idiopathic pulmonary fibrosis	exonic	synonymous SNV
	6	36679512	rs3176326	Heart failure	intronic	.
	6	37166858	rs199754787	Myocardial fibrosis	intergenic	.
	6	41699768	rs28360642	Dupuytren's disease	intronic	.
	6	42040465	rs13206037	Inflammatory bowel disease	intronic	.
	6	43237323	rs2841662	Heart failure	intergenic	.
	6	44828859	rs524492	Dupuytren's disease	UTR3	.
	6	50979582	rs4082052	Chronic kidney disease	intergenic	.
	6	56559434	rs9349828	Dupuytren's disease	intronic	.
	6	85098630	rs56214011	Carpal tunnel syndrome	intergenic	.
	6	90239477	rs62408223	Inflammatory bowel disease	intronic	.
	6	106041095	rs7761376	Inflammatory bowel disease	intergenic	.
	6	106271184	rs11752888	Systemic sclerosis	intronic	.
	6	109054915	rs11153158	Inflammatory bowel disease	intronic	.
	6	111592059	rs33980500	Inflammatory bowel disease	exonic	nonsynonymous SNV
	6	114386166	rs117171280	plantar	intergenic	.
	6	116125413	rs1064583	Carpal tunnel syndrome	exonic	nonsynonymous SNV
	6	130027974	rs6569648	Chronic kidney disease	intronic	.
	6	134058731	rs2627230	Myocardial fibrosis	intergenic	.
	6	137684378	rs17264332	Inflammatory bowel disease	intergenic	.
	6	149413961	rs366905	Dupuytren's disease	intergenic	.
	6	159650620	rs9457699	Myocardial fibrosis	intergenic	.
	6	160253600	rs3127579	Chronic kidney disease	intronic	.
	6	160589086	rs10455872	Heart failure	intronic	.
	6	167078151	rs4710176	Inflammatory bowel disease	intergenic	.
	6	168080622	rs6927897	Chronic kidney disease	intergenic	.
	7	543598	rs34890891	Dupuytren's disease	intergenic	.
	7	1246556	rs13230509	Chronic kidney disease	intergenic	.
	7	2772998	rs35957220	Inflammatory bowel disease	intronic	.
	7	3294340	rs73038857	Dupuytren's disease	intergenic	.
	7	5285782	rs139805598	Inflammatory bowel disease	intronic	.
	7	16082848	rs12539945	Carpal tunnel syndrome	intergenic	.
	7	19013110	rs57301765	Chronic kidney disease	intergenic	.
	7	28145472	rs849141	Systemic sclerosis	intronic	.
	7	28216621	rs498475	Chronic kidney disease	ncRNA_intronic	.
	7	37946454	rs2122625	plantar	intronic	.
	7	37976920	rs74335252	Dupuytren's disease	intergenic	.
	7	38020602	rs67767155	Peyronie's disease	intergenic	.
	7	44139027	rs1008384	Carpal tunnel syndrome	intronic	.
	7	45988851	rs1722123	Trigger finger	intergenic	.
	7	50283578	rs4917129	Inflammatory bowel disease	intergenic	.
	7	70076196	rs7794623	Chronic kidney disease	intronic	.
	7	74781840	rs199789198	Inflammatory bowel disease	intronic	.
	7	75424216	rs113744930	Heart failure	exonic	nonsynonymous SNV
	7	84370484	rs17214004	Carpal tunnel syndrome	intergenic	.
	7	92655809	rs11773884	Heart failure	intronic	.
	7	98348358	rs4727392	Dupuytren's disease	intronic	.
	7	100007746	rs11770546	Idiopathic pulmonary fibrosis	ncRNA_intronic	.
	7	100621544	rs12673102	Inflammatory bowel disease	intronic	.
	7	106776021	rs13225723	Chronic kidney disease	intergenic	.
	7	107880959	rs6961243	Inflammatory bowel disease	intergenic	.
	7	117267325	rs34911130	Dupuytren's disease	intergenic	.
	7	117273989	rs6951125	Peyronie's disease	intergenic	.
	7	117659380	rs113827944	Idiopathic pulmonary fibrosis	intronic	.
	7	128830784	rs3734972	Heart failure	exonic	synonymous SNV
	7	128935498	rs3778754	Inflammatory bowel disease	intergenic	.
	7	129043485	rs35188261	Systemic sclerosis	intronic	.
	7	134906346	rs12707188	Dupuytren's disease	intronic	.
	7	143381899	rs559228739	Idiopathic pulmonary fibrosis	intronic	.
	7	150845427	rs6977081	Carpal tunnel syndrome	intergenic	.
	7	150993088	rs3918226	Heart failure	intronic	.
	7	151716108	rs10224210	Chronic kidney disease	intronic	.
	8	9324101	rs2126263	Cirrhosis	upstream	.
	8	10840708	rs3808603	Heart failure	ncRNA_intronic	.
	8	11486464	rs2736340	Systemic sclerosis	intergenic	.
	8	18415790	rs1495743	Liver fibrosis	intergenic	.
	8	23890907	rs34861762	Chronic kidney disease	intergenic	.
	8	26009867	rs901177	Dupuytren's disease	intronic	.
	8	30381911	rs11781923	Dupuytren's disease	downstream	.
	8	37615393	rs713189	Dupuytren's disease	intergenic	.
	8	60605239	rs600811	Systemic sclerosis	intronic	.
	8	69142848	rs652483	Dupuytren's disease	intergenic	.
	8	70449387	rs12156267	Peyronie's disease	intergenic	.
	8	71979513	rs10111413	Inflammatory bowel disease	ncRNA_intronic	.
	8	91203695	rs7817853	Dupuytren's disease	intronic	.
	8	95789374	rs4332098	Dupuytren's disease	ncRNA_intronic	.
	8	108107899	rs443680	Dupuytren's disease	intergenic	.
	8	125495066	rs2980888	Cirrhosis	intergenic	.
	8	128528218	rs16903065	Inflammatory bowel disease	ncRNA_intronic	.
	8	140764477	rs4378011	Dupuytren's disease	intronic	.
	8	144103704	rs34173062	Inflammatory bowel disease	exonic	nonsynonymous SNV
	8	144301555	rs7386615	Dupuytren's disease	intronic	.
	9	554368	rs58774558	Myocardial fibrosis	intronic	.
	9	1202545	rs59561587	Dupuytren's disease	intergenic	.
	9	4366497	rs74573085	Dupuytren's disease	intergenic	.
	9	4984530	rs1887428	Inflammatory bowel disease	upstream	.
	9	18629794	rs1576900	Myocardial fibrosis	intronic	.
	9	22094331	rs4977757	Heart failure	ncRNA_intronic	.
	9	22136441	rs12555274	Chronic kidney disease	intergenic	.
	9	35000292	rs10972278	Dupuytren's disease	intergenic	.
	9	91169376	rs10739913	Phimosis	ncRNA_intronic	.
	9	92302480	rs6479418	Dupuytren's disease	intronic	.
	9	107666196	rs79752115	Trigger finger	intergenic	.
	9	108425271	rs504009	Dupuytren's disease	intergenic	.
	9	114371911	rs7043196	Cirrhosis	intronic	.
	9	114806486	rs6478109	Inflammatory bowel disease	upstream	.
	9	115125613	rs4979496	Dupuytren's disease	ncRNA_intronic	.
	9	126910488	rs79101546	Carpal tunnel syndrome	intergenic	.
	9	129804387	rs7029757	Cirrhosis	intronic	.
	9	130785412	rs11244139	Inflammatory bowel disease	intronic	.
	9	133264504	rs782134971	Pancreas fibrosis	.	.
	9	133271001	rs527210	Liver fibrosis	intronic	.
	9	133276354	rs600038	Heart failure	intergenic	.
	9	133563561	rs9722048	Carpal tunnel syndrome	intronic	.
	9	136372044	rs4077515	Inflammatory bowel disease	exonic	nonsynonymous SNV
	10	853131	rs80282103	Chronic kidney disease	intronic	.
	10	4661075	rs313490	Dupuytren's disease	ncRNA_intronic	.
	10	4987956	rs68057779	Peyronie's disease	UTR3	.
	10	5007406	rs67245807	Carpal tunnel syndrome	splicing	.
	10	6056986	rs706778	Phimosis	intronic	.
	10	27644947	rs2815536	Carpal tunnel syndrome	intergenic	.
	10	30439321	rs2907	Inflammatory bowel disease	intronic	.
	10	30817960	rs57822625	Carpal tunnel syndrome	intergenic	.
	10	31044551	rs57718262	Trigger finger	intergenic	.
	10	35126627	rs4934730	Inflammatory bowel disease	upstream	.
	10	35797933	rs10827544	Dupuytren's disease	ncRNA_intronic	.
	10	45452222	rs147514068	skin	ncRNA_intronic	.
	10	48162047	rs2438988	Pancreas fibrosis	intronic	.
	10	58517155	rs7098329	Chronic kidney disease	intronic	.
	10	58557344	rs35079883	Renal fibrosis	.	.
	10	62685804	rs10761659	Inflammatory bowel disease	intergenic	.
	10	70672742	rs12762780	Carpal tunnel syndrome	UTR5	.
	10	73657491	rs4746140	Heart failure	intergenic	.
	10	73860999	rs2664282	Inflammatory bowel disease	intronic	.
	10	74301204	rs56015006	Chronic kidney disease	intronic	.
	10	77923160	rs12220902	Dupuytren's disease	intronic	.
	10	79299578	rs1250551	Inflammatory bowel disease	intronic	.
	10	80415193	rs11202832	Chronic kidney disease	intronic	.
	10	80524756	rs7096909	Inflammatory bowel disease	intergenic	.
	10	92670150	rs11187129	Inflammatory bowel disease	intergenic	.
	10	95498707	rs1409712	Chronic kidney disease	intronic	.
	10	98186463	rs1325494	Carpal tunnel syndrome	intronic	.
	10	98256556	rs1983866	Chronic kidney disease	intronic	.
	10	99523573	rs10748781	Inflammatory bowel disease	intergenic	.
	10	100164661	rs10883451	Cirrhosis	intronic	.
	10	103918139	rs4387287	Idiopathic pulmonary fibrosis	UTR5	.
	10	110765326	rs1971596	Idiopathic pulmonary fibrosis	intronic	.
	10	112228257	rs12571496	Cirrhosis	intergenic	.
	10	112998590	rs7903146	Chronic kidney disease	intronic	.
	10	118359725	rs1930971	Phimosis	downstream	.
	10	119656173	rs72840788	Heart failure	intronic	.
	10	121481809	rs2912798	Dupuytren's disease	intronic	.
	10	129043829	rs11598539	Carpal tunnel syndrome	intergenic	.
	11	611919	rs702966	Systemic sclerosis	UTR3	.
	11	1219991	rs35705950	Idiopathic pulmonary fibrosis	intergenic	.
	11	1852991	rs907612	Inflammatory bowel disease	upstream	.
	11	8027704	rs149013553	Chronic kidney disease	intergenic	.
	11	8997643	rs61876274	Inflammatory bowel disease	intronic	.
	11	12193635	rs10831757	Dupuytren's disease	intronic	.
	11	15841782	rs1465893	Dupuytren's disease	intergenic	.
	11	30738788	rs3925584	Chronic kidney disease	intergenic	.
	11	31584600	rs10767900	Dupuytren's disease	intronic	.
	11	34652855	rs286897	Inflammatory bowel disease	intronic	.
	11	47327151	rs3781622	Chronic kidney disease	intronic	.
	11	55461364	rs141375403	Chronic kidney disease	intergenic	.
	11	61811991	rs174554	Liver fibrosis	intronic	.
	11	61820833	rs174564	Inflammatory bowel disease	intronic	.
	11	65480606	rs111308917	Trigger finger	intergenic	.
	11	65784647	rs948494	Chronic kidney disease	intergenic	.
	11	66609564	rs7119588	Carpal tunnel syndrome	intergenic	.
	11	76588605	rs11236797	Inflammatory bowel disease	intergenic	.
	11	89284793	rs1126809	skin	exonic	nonsynonymous SNV
	11	89491309	rs2289124	Trigger finger	UTR5	.
	11	114570526	rs511590	Inflammatory bowel disease	downstream	.
	11	118749251	rs3889239	Systemic sclerosis	UTR3	.
	11	121756557	rs10790457	Chronic kidney disease	intergenic	.
	11	128459018	rs8705	Chronic kidney disease	UTR3	.
	11	128693518	rs12420835	Dupuytren's disease	ncRNA_intronic	.
	12	4020790	rs4491325	Pancreas fibrosis	intergenic	.
	12	41932102	rs10699697	Pancreas fibrosis	.	.
	12	49005349	rs1126930	Chronic kidney disease	exonic	nonsynonymous SNV
	12	64049871	rs61931202	Dupuytren's disease	intronic	.
	12	65788675	rs971779	Chronic kidney disease	ncRNA_intronic	.
	12	68110722	rs1558743	Inflammatory bowel disease	intergenic	.
	12	69277378	rs604168	Carpal tunnel syndrome	intergenic	.
	12	77236648	rs7307337	Dupuytren's disease	intergenic	.
	12	95860750	rs6538677	Idiopathic pulmonary fibrosis	intronic	.
	12	105744149	rs61940062	Dupuytren's disease	downstream	.
	12	106750550	rs12424114	Heart failure	ncRNA_intronic	.
	12	111376351	rs7398796	Cirrhosis	intergenic	.
	12	111535554	rs597808	Heart failure	intronic	.
	12	111535554	rs597808	Phimosis	intronic	.
	12	111535554	rs597808	Chronic kidney disease	intronic	.
	12	111621753	rs11065979	Inflammatory bowel disease	intergenic	.
	12	114252139	rs1896008	Phimosis	intergenic	.
	12	119709120	rs11064881	Inflammatory bowel disease	intronic	.
	12	120235040	rs77660995	Dupuytren's disease	intronic	.
	12	121005313	rs1169314	Cirrhosis	intronic	.
	12	124827879	rs10846744	Chronic kidney disease	intronic	.
	13	26471802	rs12864131	Dupuytren's disease	intergenic	.
	13	26962439	rs9512466	Inflammatory bowel disease	intergenic	.
	13	28527544	rs9550377	Trigger finger	intergenic	.
	13	37549992	rs9576298	Dupuytren's disease	ncRNA_exonic	.
	13	40439840	rs941823	Inflammatory bowel disease	ncRNA_intronic	.
	13	44292821	rs4942308	Dupuytren's disease	intergenic	.
	13	99352859	rs9300538	Inflammatory bowel disease	intronic	.
	13	99384701	rs35694871	Phimosis	intronic	.
	13	108439198	rs150620786	Peyronie's disease	intergenic	.
	13	110396288	rs9559788	Heart failure	intronic	.
	13	112882313	rs1278769	Idiopathic pulmonary fibrosis	UTR3	.
	14	22843385	rs1042704	Peyronie's disease	exonic	nonsynonymous SNV
	14	22843385	rs1042704	Dupuytren's disease	exonic	nonsynonymous SNV
	14	24090950	rs79873985	Renal fibrosis	intronic	.
	14	24103723	rs111723834	Liver fibrosis	exonic	nonsynonymous SNV
	14	24306081	rs139893717	Cirrhosis	exonic	synonymous SNV
	14	24389911	rs116309956	Dupuytren's disease	intergenic	.
	14	34756277	rs8016548	Dupuytren's disease	intronic	.
	14	50269229	rs72683923	Chronic kidney disease	exonic	synonymous SNV
	14	50498727	rs17791680	Dupuytren's disease	intronic	.
	14	61133661	rs56278927	Dupuytren's disease	intergenic	.
	14	68760099	rs11629182	Inflammatory bowel disease	intergenic	.
	14	69298927	rs1890942	Heart failure	intronic	.
	14	75779563	rs72725608	Trigger finger	intronic	.
	14	75779563	rs72725608	Carpal tunnel syndrome	intronic	.
	14	94378610	rs28929474	Carpal tunnel syndrome	exonic	nonsynonymous SNV
	14	94378610	rs28929474	Cirrhosis	exonic	nonsynonymous SNV
	14	99673097	rs12050196	Carpal tunnel syndrome	intronic	.
	14	105999982	rs35209356	Inflammatory bowel disease	intergenic	.
	15	38937539	rs8026743	Chronic kidney disease	intergenic	.
	15	40428343	rs59424629	Idiopathic pulmonary fibrosis	intronic	.
	15	41503702	rs316617	Chronic kidney disease	UTR3	.
	15	45333281	rs1719246	Chronic kidney disease	intergenic	.
	15	53623569	rs62005941	Chronic kidney disease	intronic	.
	15	55960411	rs2102465	Dupuytren's disease	intronic	.
	15	59202474	rs2306787	Dupuytren's disease	intronic	.
	15	60610443	rs17237297	Dupuytren's disease	ncRNA_intronic	.
	15	60613790	rs340019	Cirrhosis	ncRNA_intronic	.
	15	60779075	rs7173227	Inflammatory bowel disease	intronic	.
	15	66742474	rs1866745	Carpal tunnel syndrome	intronic	.
	15	67156025	rs56375023	Inflammatory bowel disease	intronic	.
	15	68333377	rs28522005	Dupuytren's disease	intronic	.
	15	71691435	rs1566573	Trigger finger	ncRNA_exonic	.
	15	73927205	rs1048661	Carpal tunnel syndrome	exonic	nonsynonymous SNV
	15	74735539	rs2472297	Chronic kidney disease	intergenic	.
	15	74791153	rs1378940	Systemic sclerosis	intronic	.
	15	74949814	rs2415251	Inflammatory bowel disease	intergenic	.
	15	75571574	rs11853464	Dupuytren's disease	intronic	.
	15	75858740	rs4886747	Chronic kidney disease	intronic	.
	15	78754351	rs2622821	Chronic kidney disease	downstream	.
	15	80675204	rs12440543	Inflammatory bowel disease	intergenic	.
	15	85669635	rs12904047	Dupuytren's disease	intronic	.
	15	85742593	rs56141817	Idiopathic pulmonary fibrosis	intronic	.
	15	88715387	rs12594617	Dupuytren's disease	intergenic	.
	15	90551919	rs4404047	Inflammatory bowel disease	intronic	.
	15	100152748	rs72755233	Carpal tunnel syndrome	exonic	nonsynonymous SNV
	15	100862167	rs181258447	Dupuytren's disease	ncRNA_exonic	.
	16	42195	rs62031426	Idiopathic pulmonary fibrosis	intergenic	.
	16	737738	rs12597563	Heart failure	intronic	.
	16	1648265	rs190184570	Idiopathic pulmonary fibrosis	intronic	.
	16	4284961	rs72766530	Dupuytren's disease	intergenic	.
	16	11622248	rs4780394	Inflammatory bowel disease	intergenic	.
	16	20381010	rs77924615	Chronic kidney disease	intronic	.
	16	21965441	rs4850	Dupuytren's disease	exonic	nonsynonymous SNV
	16	23854665	rs886114	Inflammatory bowel disease	intronic	.
	16	28806716	rs437564	Chronic kidney disease	intergenic	.
	16	28929595	rs56933819	Inflammatory bowel disease	intergenic	.
	16	30331915	rs140935476	Inflammatory bowel disease	ncRNA_intronic	.
	16	50308747	rs17289102	Inflammatory bowel disease	exonic	synonymous SNV
	16	53768073	rs9923544	Carpal tunnel syndrome	intronic	.
	16	53772541	rs56094641	Chronic kidney disease	intronic	.
	16	53776774	rs7193144	Heart failure	intronic	.
	16	53788590	rs7190396	Phimosis	intronic	.
	16	53880018	rs11076004	Trigger finger	intronic	.
	16	66667784	rs626743	Dupuytren's disease	intronic	.
	16	67383455	rs34845769	Trigger finger	intronic	.
	16	69541335	rs62052820	Chronic kidney disease	intergenic	.
	16	69853817	rs3790085	Trigger finger	intronic	.
	16	75200375	rs1432699355	Pancreas fibrosis	.	.
	16	75391978	rs461994	Dupuytren's disease	intronic	.
	16	80606168	rs4545832	Inflammatory bowel disease	intronic	.
	16	81504858	rs62046579	Heart failure	intronic	.
	16	81883307	rs11548656	Inflammatory bowel disease	exonic	synonymous SNV
	16	85938407	rs11117422	Systemic sclerosis	intergenic	.
	16	85976134	rs16940186	Inflammatory bowel disease	intergenic	.
	16	88292560	rs28481824	Dupuytren's disease	intergenic	.
	16	88661325	rs6500487	Trigger finger	intronic	.
	16	88909502	rs7405380	Pancreas fibrosis	intronic	.
	16	88914969	rs542857381	skin	intronic	.
	16	89724871	rs35026726	skin	intronic	.
	17	835420	rs8073697	Dupuytren's disease	intronic	.
	17	2152006	rs1565763	Dupuytren's disease	intronic	.
	17	2308204	rs505744	Trigger finger	intronic	.
	17	5426796	rs138697742	Inflammatory bowel disease	intronic	.
	17	13531674	rs61092548	Dupuytren's disease	intronic	.
	17	19549399	rs2453571	Chronic kidney disease	intronic	.
	17	20218088	rs2703819	Dupuytren's disease	intronic	.
	17	31388482	rs2854334	Dupuytren's disease	intergenic	.
	17	32709136	rs9911168	Dupuytren's disease	intronic	.
	17	34240660	rs11870164	Inflammatory bowel disease	intergenic	.
	17	39756124	rs12946510	Inflammatory bowel disease	intergenic	.
	17	39803764	rs2952144	Heart failure	intronic	.
	17	39803764	rs2952144	Systemic sclerosis	intronic	.
	17	42387807	rs3736164	Inflammatory bowel disease	intronic	.
	17	43690089	rs6503467	Dupuytren's disease	intergenic	.
	17	46126154	rs113120855	Idiopathic pulmonary fibrosis	intronic	.
	17	46931204	rs197922	Chronic kidney disease	exonic	nonsynonymous SNV
	17	46935905	rs17608766	Heart failure	UTR3	.
	17	48126317	rs78077208	Inflammatory bowel disease	intergenic	.
	17	48917942	rs55929017	Chronic kidney disease	intronic	.
	17	71315812	rs7223448	Trigger finger	intergenic	.
	17	75053342	rs9906330	Inflammatory bowel disease	intronic	.
	17	75228544	rs1005714	Systemic sclerosis	intronic	.
	17	78812691	rs7220532	Chronic kidney disease	intronic	.
	17	78888144	rs2005542	Dupuytren's disease	intronic	.
	17	80426509	rs41300752	Cirrhosis	intronic	.
	17	82105650	rs8065606	Chronic kidney disease	intronic	.
	18	9764336	rs11664921	Dupuytren's disease	intronic	.
	18	12779948	rs2542151	Inflammatory bowel disease	intergenic	.
	18	24913975	rs62085779	Trigger finger	intergenic	.
	18	44686951	rs16978141	Dupuytren's disease	intronic	.
	18	49646569	rs72915968	Inflammatory bowel disease	intergenic	.
	18	54299403	rs34162186	Phimosis	intronic	.
	18	79396103	rs71359461	Chronic kidney disease	UTR5	.
	19	2038820	rs2287002	Carpal tunnel syndrome	UTR3	.
	19	4031771	rs72976966	Chronic kidney disease	intronic	.
	19	7222366	rs4804411	Cirrhosis	intronic	.
	19	8605262	rs62621197	Carpal tunnel syndrome	exonic	nonsynonymous SNV
	19	10359299	rs12720356	Inflammatory bowel disease	exonic	synonymous SNV
	19	11078223	rs112374545	Heart failure	intergenic	.
	19	11156017	rs7251031	Carpal tunnel syndrome	upstream	.
	19	18082381	rs2305743	Systemic sclerosis	intronic	.
	19	18464383	rs78030362	Dupuytren's disease	intronic	.
	19	19268740	rs58542926	Cirrhosis	exonic	nonsynonymous SNV
	19	19277691	rs8107974	Liver fibrosis	intronic	.
	19	19414983	rs2965185	Chronic kidney disease	intronic	.
	19	29700050	rs78094750	Peyronie's disease	UTR3	.
	19	33269208	rs12611394	Inflammatory bowel disease	intergenic	.
	19	39248489	rs4803221	Cirrhosis	exonic	unknown
	19	39428185	rs251858	Inflammatory bowel disease	UTR3	.
	19	44908684	rs429358	Cirrhosis	exonic	synonymous SNV
	19	45869960	rs7254364	Inflammatory bowel disease	intronic	.
	19	48703205	rs681343	Liver fibrosis	exonic	synonymous SNV
	19	48706068	rs2548458	Pancreas fibrosis	downstream	.
	19	48756272	rs838133	Cirrhosis	exonic	synonymous SNV
	19	57166826	rs11672517	Dupuytren's disease	intronic	.
	20	6492271	rs6054308	Peyronie's disease	ncRNA_intronic	.
	20	7262893	rs6117726	Carpal tunnel syndrome	intergenic	.
	20	8334670	rs6055748	Chronic kidney disease	intronic	.
	20	10648877	rs35308216	Dupuytren's disease	intronic	.
	20	18445795	rs6136381	Chronic kidney disease	intronic	.
	20	21395188	rs6035868	Heart failure	downstream	.
	20	32448133	rs3746612	Inflammatory bowel disease	intronic	.
	20	33917852	rs62209647	skin	intergenic	.
	20	34632266	rs6059956	Chronic kidney disease	intronic	.
	20	34972369	rs6120777	Myocardial fibrosis	intronic	.
	20	35268871	rs2425039	skin	intronic	.
	20	35437976	rs143384	Trigger finger	UTR5	.
	20	40481539	rs12481155	Dupuytren's disease	intergenic	.
	20	44436388	rs6017342	Inflammatory bowel disease	intergenic	.
	20	46900932	rs2236519	Dupuytren's disease	intronic	.
	20	50218794	rs2094716	Pancreas fibrosis	intergenic	.
	20	50370030	rs6012915	Inflammatory bowel disease	intergenic	.
	20	50441106	rs1810500	Peyronie's disease	intergenic	.
	20	51573085	rs6013222	Dupuytren's disease	intergenic	.
	20	57571187	rs1569718	Chronic kidney disease	intergenic	.
	20	59249254	rs259964	Inflammatory bowel disease	intronic	.
	20	63605726	rs145783026	Idiopathic pulmonary fibrosis	intronic	.
	20	63697746	rs6062496	Inflammatory bowel disease	ncRNA_intronic	.
	21	15410764	rs2823254	Chronic kidney disease	intergenic	.
	21	15427499	rs7276764	Inflammatory bowel disease	intergenic	.
	21	27266812	rs235931	Dupuytren's disease	intergenic	.
	21	29162364	rs2832228	Heart failure	intronic	.
	21	32176053	rs76775133	Trigger finger	intergenic	.
	21	34016931	rs141675023	Chronic kidney disease	intergenic	.
	21	35550700	rs932282	Dupuytren's disease	ncRNA_intronic	.
	21	38611524	rs117870289	Dupuytren's disease	intronic	.
	21	39094644	rs2836882	Inflammatory bowel disease	intergenic	.
	22	21630090	rs3747093	Inflammatory bowel disease	upstream	.
	22	28843169	rs7287124	Pancreas fibrosis	intergenic	.
	22	29464823	rs117765870	Dupuytren's disease	intergenic	.
	22	30174033	rs1003342	Inflammatory bowel disease	intronic	.
	22	36308504	rs4820227	Chronic kidney disease	intronic	.
	22	37066896	rs855791	Myocardial fibrosis	exonic	synonymous SNV
	22	37073152	rs6000553	Liver fibrosis	intronic	.
	22	39266475	rs9611131	Inflammatory bowel disease	intergenic	.
	22	40559560	rs5758007	Carpal tunnel syndrome	intronic	.
	22	41383967	rs767593	Inflammatory bowel disease	intronic	.
	22	41825842	rs41277466	Carpal tunnel syndrome	UTR3	.
	22	42716955	rs738527	Chronic kidney disease	intronic	.
	22	43928847	rs738409	Liver fibrosis	exonic	nonsynonymous SNV
	22	43928850	rs738408	Cirrhosis	exonic	synonymous SNV
	22	45970285	rs10453460	plantar	intronic	.
	22	45971264	rs28971325	Peyronie's disease	intronic	.
	22	45971264	rs28971325	Dupuytren's disease	intronic	.
	22	49919157	rs573197054	Pancreas fibrosis	intronic	.
	22	49960607	rs28375915	Inflammatory bowel disease	upstream	.

## Sheet: S7 - Consequence overview
	Supplementary Table 7. Variant consequence overview
	Consequence	Frequency	Percentage
	downstream	9	0.0139535
	exonic	53	0.0821705
	intergenic	225	0.348837
	intronic	272	0.421705
	ncRNA_exonic	6	0.00930233
	ncRNA_intronic	35	0.0542636
	splicing	1	0.00155039
	upstream	10	0.0155039
	upstream;downstream	0	0
	UTR3	16	0.0248062
	UTR5	7	0.0108527
	.	11	0.0170543
	Total	645

## Sheet: S8 - Gene prioritization
	Supplementary Table 8. Gene prioritization
	locus	SNP	CHR	BP	Gene	Start	Stop	Nearest	V2G	eQTL	Coding	Sum	locus_start	locus_end	prioritized	Colocalized_locus
	1	rs307349	1	1327586	CPTP	1324756	1328897	1	0	1	1	3	827586	1827586	1	0
	1	rs307349	1	1327586	SAMD11	924880	944575	0	0	0	0	0	827586	1827586	0	0
	1	rs307349	1	1327586	NOC2L	944204	959309	0	0	0	0	0	827586	1827586	0	0
	1	rs307349	1	1327586	KLHL17	960587	965715	0	0	0	0	0	827586	1827586	0	0
	1	rs307349	1	1327586	PLEKHN1	966497	975865	0	0	0	0	0	827586	1827586	0	0
	1	rs307349	1	1327586	PERM1	975199	982117	0	0	0	0	0	827586	1827586	0	0
	1	rs307349	1	1327586	HES4	998962	1000172	0	0	0	0	0	827586	1827586	0	0
	1	rs307349	1	1327586	ISG15	1013423	1014540	0	0	0	0	0	827586	1827586	0	0
	1	rs307349	1	1327586	AGRN	1020123	1056116	0	0	0	0	0	827586	1827586	0	0
	1	rs307349	1	1327586	RNF223	1070966	1074307	0	0	0	0	0	827586	1827586	0	0
	1	rs307349	1	1327586	C1orf159	1081818	1116361	0	0	0	0	0	827586	1827586	0	0
	1	rs307349	1	1327586	TTLL10	1173884	1197935	0	0	0	0	0	827586	1827586	0	0
	1	rs307349	1	1327586	TNFRSF18	1203508	1206691	0	0	1	0	1	827586	1827586	0	0
	1	rs307349	1	1327586	TNFRSF4	1211326	1214138	0	0	0	0	0	827586	1827586	0	0
	1	rs307349	1	1327586	SDF4	1216908	1232031	0	0	1	0	1	827586	1827586	0	0
	1	rs307349	1	1327586	B3GALT6	1232249	1235041	0	0	1	0	1	827586	1827586	0	0
	1	rs307349	1	1327586	C1QTNF12	1242446	1246722	0	0	0	0	0	827586	1827586	0	0
	1	rs307349	1	1327586	UBE2J2	1253909	1273885	0	0	0	0	0	827586	1827586	0	0
	1	rs307349	1	1327586	SCNN1D	1280436	1292029	0	0	1	0	1	827586	1827586	0	0
	1	rs307349	1	1327586	ACAP3	1292376	1309609	0	0	1	0	1	827586	1827586	0	0
	1	rs307349	1	1327586	PUSL1	1308567	1311677	0	0	1	0	1	827586	1827586	0	0
	1	rs307349	1	1327586	INTS11	1311585	1324691	0	1	1	0	2	827586	1827586	0	0
	1	rs307349	1	1327586	TAS1R3	1331314	1335306	0	0	1	0	1	827586	1827586	0	0
	1	rs307349	1	1327586	DVL1	1335276	1349350	0	0	1	0	1	827586	1827586	0	0
	1	rs307349	1	1327586	MXRA8	1352689	1361777	0	0	1	0	1	827586	1827586	0	0
	1	rs307349	1	1327586	AURKAIP1	1373730	1375495	0	0	1	0	1	827586	1827586	0	0
	1	rs307349	1	1327586	CCNL2	1385711	1399328	0	0	0	0	0	827586	1827586	0	0
	1	rs307349	1	1327586	MRPL20	1401908	1407313	0	0	1	0	1	827586	1827586	0	0
	1	rs307349	1	1327586	ANKRD65	1418420	1421769	0	0	1	0	1	827586	1827586	0	0
	1	rs307349	1	1327586	TMEM88B	1426128	1427787	0	0	0	0	0	827586	1827586	0	0
	1	rs307349	1	1327586	VWA1	1434861	1442882	0	0	1	0	1	827586	1827586	0	0
	1	rs307349	1	1327586	ATAD3C	1449689	1470158	0	0	1	0	1	827586	1827586	0	0
	1	rs307349	1	1327586	ATAD3B	1471763	1497848	0	0	1	0	1	827586	1827586	0	0
	1	rs307349	1	1327586	ATAD3A	1512151	1534687	0	0	1	0	1	827586	1827586	0	0
	1	rs307349	1	1327586	TMEM240	1535174	1540453	0	0	0	0	0	827586	1827586	0	0
	1	rs307349	1	1327586	SSU72	1541673	1574869	0	0	1	0	1	827586	1827586	0	0
	1	rs307349	1	1327586	FNDC10	1598012	1600096	0	0	0	0	0	827586	1827586	0	0
	1	rs307349	1	1327586	MIB2	1615415	1630610	0	0	0	0	0	827586	1827586	0	0
	1	rs307349	1	1327586	MMP23B	1632095	1634405	0	0	0	0	0	827586	1827586	0	0
	1	rs307349	1	1327586	CDK11B	1638939	1646196	0	0	0	0	0	827586	1827586	0	0
	1	rs307349	1	1327586	SLC35E2B	1664429	1692728	0	0	0	0	0	827586	1827586	0	0
	1	rs307349	1	1327586	CDK11A	1702730	1724327	0	0	0	0	0	827586	1827586	0	0
	1	rs307349	1	1327586	SLC35E2A	1724838	1745992	0	0	0	0	0	827586	1827586	0	0
	1	rs307349	1	1327586	NADK	1751232	1780457	0	0	0	0	0	827586	1827586	0	0
	1	rs307349	1	1327586	GNB1	1785290	1891056	0	0	0	0	0	827586	1827586	0	0
	2	rs35608674	1	2455297	PLCH2	2425980	2505530	1	1	0	0	2	1955297	2955297	1	0
	2	rs35608674	1	2455297	CFAP74	1921957	2003837	0	0	0	0	0	1955297	2955297	0	0
	2	rs35608674	1	2455297	GABRD	2019341	2030753	0	0	0	0	0	1955297	2955297	0	0
	2	rs35608674	1	2455297	PRKCZ	2050470	2185395	0	0	0	0	0	1955297	2955297	0	0
	2	rs35608674	1	2455297	FAAP20	2184464	2212720	0	0	0	0	0	1955297	2955297	0	0
	2	rs35608674	1	2455297	SKI	2228695	2310119	0	0	0	0	0	1955297	2955297	0	0
	2	rs35608674	1	2455297	MORN1	2321253	2391707	0	0	0	0	0	1955297	2955297	0	0
	2	rs35608674	1	2455297	RER1	2391828	2405444	0	0	0	0	0	1955297	2955297	0	0
	2	rs35608674	1	2455297	PEX10	2404797	2413797	0	0	0	0	0	1955297	2955297	0	0
	2	rs35608674	1	2455297	PANK4	2508533	2526600	0	0	0	0	0	1955297	2955297	0	0
	2	rs35608674	1	2455297	HES5	2528745	2530245	0	0	0	0	0	1955297	2955297	0	0
	2	rs35608674	1	2455297	TNFRSF14	2555639	2565382	0	0	0	0	0	1955297	2955297	0	0
	2	rs35608674	1	2455297	PRXL2B	2586491	2591469	0	0	0	0	0	1955297	2955297	0	0
	2	rs35608674	1	2455297	MMEL1	2590639	2633042	0	0	1	0	1	1955297	2955297	0	0
	2	rs35608674	1	2455297	TTC34	2635976	2702781	0	0	0	0	0	1955297	2955297	0	0
	3	rs4325151	1	8108857	PARK7	7954291	7985505	0	1	1	0	2	7608857	8608857	1	0
	3	rs4325151	1	8108857	VAMP3	7771269	7781432	0	0	1	0	1	7608857	8608857	0	0
	3	rs4325151	1	8108857	PER3	7784320	7845177	0	0	0	0	0	7608857	8608857	0	0
	3	rs4325151	1	8108857	UTS2	7843083	7853512	0	0	0	0	0	7608857	8608857	0	0
	3	rs4325151	1	8108857	TNFRSF9	7919847	7940866	0	0	0	0	0	7608857	8608857	0	0
	3	rs4325151	1	8108857	ERRFI1	8004404	8026308	1	0	0	0	1	7608857	8608857	0	0
	3	rs4325151	1	8108857	SLC45A1	8317826	8344167	0	0	1	0	1	7608857	8608857	0	0
	3	rs4325151	1	8108857	RERE	8504450	8817643	0	0	0	0	0	7608857	8608857	0	0
	4	rs2128416	1	10640391	UBE4B	10032832	10181239	0	0	0	0	0	10140391	11140391	0	0
	4	rs2128416	1	10640391	KIF1B	10210805	10381603	0	0	0	0	0	10140391	11140391	0	0
	4	rs2128416	1	10640391	PGD	10398592	10420144	0	0	0	0	0	10140391	11140391	0	0
	4	rs2128416	1	10640391	CENPS	10430102	10452153	0	0	0	0	0	10140391	11140391	0	0
	4	rs2128416	1	10640391	CORT	10449719	10451902	0	0	0	0	0	10140391	11140391	0	0
	4	rs2128416	1	10640391	DFFA	10456522	10472526	0	0	0	0	0	10140391	11140391	0	0
	4	rs2128416	1	10640391	PEX14	10472288	10630758	0	0	0	0	0	10140391	11140391	0	0
	4	rs2128416	1	10640391	CASZ1	10636604	10796650	1	0	0	0	1	10140391	11140391	0	0
	4	rs2128416	1	10640391	CIROZ	10946471	10982037	0	0	0	0	0	10140391	11140391	0	0
	4	rs2128416	1	10640391	TARDBP	11012357	11025739	0	0	0	0	0	10140391	11140391	0	0
	4	rs2128416	1	10640391	MASP2	11026523	11047233	0	0	0	0	0	10140391	11140391	0	0
	4	rs2128416	1	10640391	SRM	11054584	11060024	0	0	0	0	0	10140391	11140391	0	0
	4	rs2128416	1	10640391	EXOSC10	11066618	11099881	0	0	0	0	0	10140391	11140391	0	0
	4	rs2128416	1	10640391	MTOR	11106535	11262507	0	0	0	0	0	10140391	11140391	0	0
	5	rs284278	1	10730479	CASZ1	10636604	10796650	1	1	0	0	2	10230479	11230479	1	0
	5	rs284278	1	10730479	KIF1B	10210805	10381603	0	0	0	0	0	10230479	11230479	0	0
	5	rs284278	1	10730479	PGD	10398592	10420144	0	0	0	0	0	10230479	11230479	0	0
	5	rs284278	1	10730479	CENPS	10430102	10452153	0	0	0	0	0	10230479	11230479	0	0
	5	rs284278	1	10730479	CORT	10449719	10451902	0	0	0	0	0	10230479	11230479	0	0
	5	rs284278	1	10730479	DFFA	10456522	10472526	0	0	0	0	0	10230479	11230479	0	0
	5	rs284278	1	10730479	PEX14	10472288	10630758	0	0	0	0	0	10230479	11230479	0	0
	5	rs284278	1	10730479	CIROZ	10946471	10982037	0	0	0	0	0	10230479	11230479	0	0
	5	rs284278	1	10730479	TARDBP	11012357	11025739	0	0	0	0	0	10230479	11230479	0	0
	5	rs284278	1	10730479	MASP2	11026523	11047233	0	0	0	0	0	10230479	11230479	0	0
	5	rs284278	1	10730479	SRM	11054584	11060024	0	0	0	0	0	10230479	11230479	0	0
	5	rs284278	1	10730479	EXOSC10	11066618	11099881	0	0	0	0	0	10230479	11230479	0	0
	5	rs284278	1	10730479	MTOR	11106535	11262507	0	0	0	0	0	10230479	11230479	0	0
	5	rs284278	1	10730479	ANGPTL7	11189341	11195981	0	0	0	0	0	10230479	11230479	0	0
	6	rs7553827	1	11162336	MTOR	11106535	11262507	0	0	1	1	2	10662336	11662336	1	1
	6	rs7553827	1	11162336	CASZ1	10636604	10796650	0	0	0	0	0	10662336	11662336	0	1
	6	rs7553827	1	11162336	CIROZ	10946471	10982037	0	0	0	0	0	10662336	11662336	0	1
	6	rs7553827	1	11162336	TARDBP	11012357	11025739	0	0	0	0	0	10662336	11662336	0	1
	6	rs7553827	1	11162336	MASP2	11026523	11047233	0	0	1	0	1	10662336	11662336	0	1
	6	rs7553827	1	11162336	SRM	11054584	11060024	0	0	1	0	1	10662336	11662336	0	1
	6	rs7553827	1	11162336	EXOSC10	11066618	11099881	0	1	1	0	2	10662336	11662336	0	1
	6	rs7553827	1	11162336	ANGPTL7	11189341	11195981	1	0	1	0	2	10662336	11662336	0	1
	6	rs7553827	1	11162336	UBIAD1	11273206	11296049	0	0	0	0	0	10662336	11662336	0	1
	6	rs7553827	1	11162336	DISP3	11479166	11537584	0	0	0	0	0	10662336	11662336	0	1
	6	rs7553827	1	11162336	FBXO2	11648367	11655785	0	0	0	0	0	10662336	11662336	0	1
	6	rs7553827	1	11162336	FBXO44	11654375	11663327	0	0	0	0	0	10662336	11662336	0	1
	7	rs10157011	1	15586228	CASP9	15490832	15526534	0	1	1	1	3	15086228	16086228	1	0
	7	rs10157011	1	15586228	KAZN	14598704	15118043	0	0	0	0	0	15086228	16086228	0	0
	7	rs10157011	1	15586228	TMEM51	15152532	15220480	0	0	0	0	0	15086228	16086228	0	0
	7	rs10157011	1	15586228	TMEM51-AS2	15164344	15171317	0	0	0	0	0	15086228	16086228	0	0
	7	rs10157011	1	15586228	FHAD1	15247272	15400283	0	0	1	0	1	15086228	16086228	0	0
	7	rs10157011	1	15586228	EFHD2	15409895	15430343	0	0	0	0	0	15086228	16086228	0	0
	7	rs10157011	1	15586228	CTRC	15443382	15449242	0	0	0	0	0	15086228	16086228	0	0
	7	rs10157011	1	15586228	CELA2A	15456728	15472091	0	0	0	0	0	15086228	16086228	0	0
	7	rs10157011	1	15586228	CELA2B	15465909	15491400	0	0	0	0	0	15086228	16086228	0	0
	7	rs10157011	1	15586228	DNAJC16	15526813	15592379	0	0	0	0	0	15086228	16086228	0	0
	7	rs10157011	1	15586228	AGMAT	15572353	15585110	1	0	0	1	2	15086228	16086228	0	0
	7	rs10157011	1	15586228	DDI2	15617500	15669044	0	0	1	0	1	15086228	16086228	0	0
	7	rs10157011	1	15586228	RSC1A1	15659869	15661722	0	0	0	0	0	15086228	16086228	0	0
	7	rs10157011	1	15586228	PLEKHM2	15684332	15734769	0	0	0	0	0	15086228	16086228	0	0
	7	rs10157011	1	15586228	SLC25A34	15736405	15741396	0	0	0	0	0	15086228	16086228	0	0
	7	rs10157011	1	15586228	TMEM82	15742422	15747982	0	0	0	0	0	15086228	16086228	0	0
	7	rs10157011	1	15586228	FBLIM1	15756607	15786594	0	0	0	0	0	15086228	16086228	0	0
	7	rs10157011	1	15586228	SPEN	15847864	15940460	0	0	0	0	0	15086228	16086228	0	0
	7	rs10157011	1	15586228	ZBTB17	15941869	15976132	0	0	0	0	0	15086228	16086228	0	0
	7	rs10157011	1	15586228	SRARP	16004236	16008807	0	0	0	0	0	15086228	16086228	0	0
	7	rs10157011	1	15586228	HSPB7	16014028	16019594	0	0	0	0	0	15086228	16086228	0	0
	7	rs10157011	1	15586228	CLCNKA	16018875	16034050	0	0	0	0	0	15086228	16086228	0	0
	7	rs10157011	1	15586228	CLCNKB	16043777	16057308	0	0	1	0	1	15086228	16086228	0	0
	7	rs10157011	1	15586228	FAM131C	16057769	16073632	0	0	0	0	0	15086228	16086228	0	0
	7	rs2086382165	1	16428690	SPEN	15847864	15940460	0	0	0	0	0	15086228	16086228	0	0
	7	rs2086382165	1	16428690	ZBTB17	15941869	15976132	0	0	0	0	0	15086228	16086228	0	0
	7	rs2086382165	1	16428690	SRARP	16004236	16008807	0	0	0	0	0	15086228	16086228	0	0
	7	rs2086382165	1	16428690	HSPB7	16014028	16019594	0	0	0	0	0	15086228	16086228	0	0
	7	rs2086382165	1	16428690	CLCNKA	16018875	16034050	0	0	0	0	0	15086228	16086228	0	0
	7	rs2086382165	1	16428690	CLCNKB	16043777	16057308	0	0	1	0	1	15086228	16086228	0	0
	7	rs2086382165	1	16428690	FAM131C	16057769	16073632	0	0	0	0	0	15086228	16086228	0	0
	7	rs2086382165	1	16428690	EPHA2	16124337	16156087	0	0	0	0	0	15086228	16086228	0	0
	7	rs2086382165	1	16428690	ARHGEF19	16197854	16212609	0	0	0	0	0	15086228	16086228	0	0
	7	rs2086382165	1	16428690	CPLANE2	16231700	16237162	0	0	0	0	0	15086228	16086228	0	0
	7	rs2086382165	1	16428690	FBXO42	16246839	16352454	0	0	0	0	0	15086228	16086228	0	0
	7	rs2086382165	1	16428690	SZRD1	16352575	16398145	0	0	0	0	0	15086228	16086228	0	0
	7	rs2086382165	1	16428690	SPATA21	16387117	16437424	0	0	0	0	0	15086228	16086228	0	0
	7	rs2086382165	1	16428690	NECAP2	16440672	16460078	0	0	0	0	0	15086228	16086228	0	0
	7	rs2086382165	1	16428690	ENSG00000268674	16539066	16539575	0	0	0	0	0	15086228	16086228	0	0
	7	rs2086382165	1	16428690	NBPF1	16562319	16613562	0	0	0	0	0	15086228	16086228	0	0
	7	rs2086382165	1	16428690	CROCC	16849164	16972979	0	0	0	0	0	15086228	16086228	0	0
	8	rs3961710	1	15986677	CLCNKA	16018875	16034050	0	1	1	0	2	15486677	16486677	1	0
	8	rs3961710	1	15986677	CELA2B	15465909	15491400	0	0	0	0	0	15486677	16486677	0	0
	8	rs3961710	1	15986677	CASP9	15490832	15526534	0	0	0	0	0	15486677	16486677	0	0
	8	rs3961710	1	15986677	DNAJC16	15526813	15592379	0	0	0	0	0	15486677	16486677	0	0
	8	rs3961710	1	15986677	AGMAT	15572353	15585110	0	0	0	0	0	15486677	16486677	0	0
	8	rs3961710	1	15986677	DDI2	15617500	15669044	0	0	0	0	0	15486677	16486677	0	0
	8	rs3961710	1	15986677	RSC1A1	15659869	15661722	0	0	0	0	0	15486677	16486677	0	0
	8	rs3961710	1	15986677	PLEKHM2	15684332	15734769	0	0	0	0	0	15486677	16486677	0	0
	8	rs3961710	1	15986677	SLC25A34	15736405	15741396	0	0	0	0	0	15486677	16486677	0	0
	8	rs3961710	1	15986677	TMEM82	15742422	15747982	0	0	0	0	0	15486677	16486677	0	0
	8	rs3961710	1	15986677	FBLIM1	15756607	15786594	0	0	0	0	0	15486677	16486677	0	0
	8	rs3961710	1	15986677	SPEN	15847864	15940460	0	0	1	0	1	15486677	16486677	0	0
	8	rs3961710	1	15986677	ZBTB17	15941869	15976132	1	0	0	0	1	15486677	16486677	0	0
	8	rs3961710	1	15986677	SRARP	16004236	16008807	0	0	0	0	0	15486677	16486677	0	0
	8	rs3961710	1	15986677	HSPB7	16014028	16019594	0	0	1	0	1	15486677	16486677	0	0
	8	rs3961710	1	15986677	CLCNKB	16043777	16057308	0	0	1	0	1	15486677	16486677	0	0
	8	rs3961710	1	15986677	FAM131C	16057769	16073632	0	0	1	0	1	15486677	16486677	0	0
	8	rs3961710	1	15986677	EPHA2	16124337	16156087	0	0	0	0	0	15486677	16486677	0	0
	8	rs3961710	1	15986677	ARHGEF19	16197854	16212609	0	0	0	0	0	15486677	16486677	0	0
	8	rs3961710	1	15986677	CPLANE2	16231700	16237162	0	0	0	0	0	15486677	16486677	0	0
	8	rs3961710	1	15986677	FBXO42	16246839	16352454	0	0	0	0	0	15486677	16486677	0	0
	8	rs3961710	1	15986677	SZRD1	16352575	16398145	0	0	0	0	0	15486677	16486677	0	0
	8	rs3961710	1	15986677	SPATA21	16387117	16437424	0	0	0	0	0	15486677	16486677	0	0
	8	rs3961710	1	15986677	NECAP2	16440672	16460078	0	0	0	0	0	15486677	16486677	0	0
	9	rs10737481	1	19845021	CAPZB	19338773	19485572	0	0	0	0	0	19345021	20345021	0	0
	9	rs10737481	1	19845021	MICOS10	19596983	19629820	0	0	0	0	0	19345021	20345021	0	0
	9	rs10737481	1	19845021	NBL1	19640554	19651290	0	0	0	0	0	19345021	20345021	0	0
	9	rs10737481	1	19845021	HTR6	19665287	19679562	0	0	0	0	0	19345021	20345021	0	0
	9	rs10737481	1	19845021	TMCO4	19682213	19799945	0	0	1	0	1	19345021	20345021	0	0
	9	rs10737481	1	19845021	RNF186	19814030	19815278	1	0	0	0	1	19345021	20345021	0	0
	9	rs10737481	1	19845021	OTUD3	19882513	19912945	0	1	0	0	1	19345021	20345021	0	0
	9	rs10737481	1	19845021	PLA2G2E	19920009	19923617	0	0	0	0	0	19345021	20345021	0	0
	9	rs10737481	1	19845021	PLA2G2A	19975432	19980439	0	0	0	0	0	19345021	20345021	0	0
	9	rs10737481	1	19845021	PLA2G5	20028179	20091190	0	0	1	0	1	19345021	20345021	0	0
	9	rs10737481	1	19845021	PLA2G2D	20111939	20119557	0	0	0	0	0	19345021	20345021	0	0
	9	rs10737481	1	19845021	PLA2G2F	20139326	20150386	0	0	0	0	0	19345021	20345021	0	0
	9	rs10737481	1	19845021	PLA2G2C	20161253	20177424	0	0	0	0	0	19345021	20345021	0	0
	9	rs10737481	1	19845021	UBXN10	20186085	20196048	0	0	0	0	0	19345021	20345021	0	0
	9	rs10737481	1	19845021	VWA5B1	20290919	20354894	0	0	0	0	0	19345021	20345021	0	0
	10	rs4655025	1	22133261	CDC42	22052627	22092944	0	1	1	0	2	21633261	22633261	1	1
	10	rs4655025	1	22133261	RAP1GAP	21596215	21669308	0	0	0	0	0	21633261	22633261	0	1
	10	rs4655025	1	22133261	USP48	21678298	21783606	0	0	0	0	0	21633261	22633261	0	1
	10	rs4655025	1	22133261	LDLRAD2	21812265	21825221	0	0	0	0	0	21633261	22633261	0	1
	10	rs4655025	1	22133261	HSPG2	21822245	21937297	0	0	0	0	0	21633261	22633261	0	1
	10	rs4655025	1	22133261	CELA3B	21977021	21998642	0	0	0	0	0	21633261	22633261	0	1
	10	rs4655025	1	22133261	CELA3A	22001656	22012539	0	0	0	0	0	21633261	22633261	0	1
	10	rs4655025	1	22133261	WNT4	22117305	22143969	1	0	0	0	1	21633261	22633261	0	1
	10	rs4655025	1	22133261	ZBTB40	22451851	22531157	0	0	0	0	0	21633261	22633261	0	1
	10	rs4655025	1	22133261	EPHA8	22563564	22603594	0	0	0	0	0	21633261	22633261	0	1
	11	rs7524102	1	22371954	ZBTB40	22451851	22531157	1	1	0	0	2	21871954	22871954	1	0
	11	rs7524102	1	22371954	HSPG2	21822245	21937297	0	0	0	0	0	21871954	22871954	0	0
	11	rs7524102	1	22371954	CELA3B	21977021	21998642	0	0	0	0	0	21871954	22871954	0	0
	11	rs7524102	1	22371954	CELA3A	22001656	22012539	0	0	0	0	0	21871954	22871954	0	0
	11	rs7524102	1	22371954	CDC42	22052627	22092944	0	0	0	0	0	21871954	22871954	0	0
	11	rs7524102	1	22371954	WNT4	22117305	22143969	0	0	1	0	1	21871954	22871954	0	0
	11	rs7524102	1	22371954	EPHA8	22563564	22603594	0	0	0	0	0	21871954	22871954	0	0
	11	rs7524102	1	22371954	C1QA	22636506	22639608	0	0	0	0	0	21871954	22871954	0	0
	11	rs7524102	1	22371954	C1QC	22643630	22648110	0	0	0	0	0	21871954	22871954	0	0
	11	rs7524102	1	22371954	C1QB	22652762	22661538	0	0	0	0	0	21871954	22871954	0	0
	11	rs7524102	1	22371954	EPHB2	22710839	22915325	0	0	0	0	0	21871954	22871954	0	0
	12	rs34963268	1	22384384	ZBTB40	22451851	22531157	1	1	0	0	2	21884384	22884384	1	0
	12	rs34963268	1	22384384	HSPG2	21822245	21937297	0	0	0	0	0	21884384	22884384	0	0
	12	rs34963268	1	22384384	CELA3B	21977021	21998642	0	0	0	0	0	21884384	22884384	0	0
	12	rs34963268	1	22384384	CELA3A	22001656	22012539	0	0	0	0	0	21884384	22884384	0	0
	12	rs34963268	1	22384384	CDC42	22052627	22092944	0	0	0	0	0	21884384	22884384	0	0
	12	rs34963268	1	22384384	WNT4	22117305	22143969	0	0	0	0	0	21884384	22884384	0	0
	12	rs34963268	1	22384384	EPHA8	22563564	22603594	0	0	0	0	0	21884384	22884384	0	0
	12	rs34963268	1	22384384	C1QA	22636506	22639608	0	0	0	0	0	21884384	22884384	0	0
	12	rs34963268	1	22384384	C1QC	22643630	22648110	0	0	0	0	0	21884384	22884384	0	0
	12	rs34963268	1	22384384	C1QB	22652762	22661538	0	0	0	0	0	21884384	22884384	0	0
	12	rs34963268	1	22384384	EPHB2	22710839	22915325	0	0	0	0	0	21884384	22884384	0	0
	13	rs591088	1	41972525	HIVEP3	41506365	42035925	1	1	0	0	2	41472525	42472525	1	0
	13	rs591088	1	41972525	EDN2	41478775	41484673	0	0	0	0	0	41472525	42472525	0	0
	13	rs591088	1	41972525	GUCA2B	42153421	42155824	0	0	0	0	0	41472525	42472525	0	0
	13	rs591088	1	41972525	GUCA2A	42162691	42164718	0	0	0	0	0	41472525	42472525	0	0
	13	rs591088	1	41972525	FOXJ3	42176539	42335877	0	0	0	0	0	41472525	42472525	0	0
	13	rs591088	1	41972525	RIMKLA	42380795	42422578	0	0	1	0	1	41472525	42472525	0	0
	13	rs591088	1	41972525	ZMYND12	42430329	42456267	0	0	0	0	0	41472525	42472525	0	0
	13	rs591088	1	41972525	PPCS	42456117	42473385	0	0	0	0	0	41472525	42472525	0	0
	13	rs591088	1	41972525	CCDC30	42463330	42654664	0	0	0	0	0	41472525	42472525	0	0
	14	rs35004807	1	50642739	DMRTA2	50417550	50423500	1	1	0	0	2	50142739	51142739	1	0
	14	rs35004807	1	50642739	ELAVL4	50048014	50203786	0	0	0	0	0	50142739	51142739	0	0
	14	rs35004807	1	50642739	FAF1	50439478	50960263	0	0	0	0	0	50142739	51142739	0	0
	14	rs35004807	1	50642739	CDKN2C	50960745	50974633	0	0	0	0	0	50142739	51142739	0	0
	14	rs35004807	1	50642739	C1orf185	51102234	51148080	0	0	0	0	0	50142739	51142739	0	0
	15	rs149288352	1	50883991	DMRTA2	50417550	50423500	0	0	0	0	0	50383991	51383991	0	0
	15	rs149288352	1	50883991	FAF1	50439478	50960263	1	0	0	0	1	50383991	51383991	0	0
	15	rs149288352	1	50883991	CDKN2C	50960745	50974633	0	0	0	0	0	50383991	51383991	0	0
	15	rs149288352	1	50883991	C1orf185	51102234	51148080	0	0	0	0	0	50383991	51383991	0	0
	15	rs149288352	1	50883991	RNF11	51236271	51273455	0	0	0	0	0	50383991	51383991	0	0
	15	rs149288352	1	50883991	TTC39A	51287258	51345116	0	0	0	0	0	50383991	51383991	0	0
	15	rs149288352	1	50883991	EPS15	51354263	51519328	0	1	0	0	1	50383991	51383991	0	0
	16	rs2802861	1	55257768	USP24	55066359	55215113	1	1	1	0	3	54757768	55757768	1	0
	16	rs2802861	1	55257768	PARS2	54756898	54764514	0	0	0	0	0	54757768	55757768	0	0
	16	rs2802861	1	55257768	TTC22	54779712	54801267	0	0	0	0	0	54757768	55757768	0	0
	16	rs2802861	1	55257768	CIMAP2	54806063	54842252	0	0	0	0	0	54757768	55757768	0	0
	16	rs2802861	1	55257768	DHCR24	54849633	54887218	0	0	0	0	0	54757768	55757768	0	0
	16	rs2802861	1	55257768	TMEM61	54980792	54992293	0	0	0	0	0	54757768	55757768	0	0
	16	rs2802861	1	55257768	BSND	54998933	55010883	0	0	0	0	0	54757768	55757768	0	0
	16	rs2802861	1	55257768	PCSK9	55039548	55064852	0	0	1	0	1	54757768	55757768	0	0
	17	rs9970807	1	56499992	PLPP3	56550713	56645301	1	1	0	0	2	55999992	56999992	1	1
	17	rs9970807	1	56499992	PRKAA2	56645322	56715335	0	0	0	0	0	55999992	56999992	0	1
	17	rs9970807	1	56499992	FYB2	56718804	56819696	0	0	0	0	0	55999992	56999992	0	1
	17	rs9970807	1	56499992	C8A	56854806	56918221	0	0	0	0	0	55999992	56999992	0	1
	17	rs9970807	1	56499992	C8B	56929210	56966140	0	0	0	0	0	55999992	56999992	0	1
	18	rs2474370	1	61421219	NFIA	60865259	61462793	0	0	0	0	0	60921219	61921219	0	0
	18	rs2474370	1	61421219	TM2D1	61681046	61725423	1	0	0	0	1	60921219	61921219	0	0
	18	rs2474370	1	61421219	PATJ	61742477	62163920	0	1	0	0	1	60921219	61921219	0	0
	19	rs11581607	1	67242007	C1orf141	67092165	67231853	1	0	1	0	2	66742007	67742007	1	0
	19	rs11581607	1	67242007	SGIP1	66533383	66748299	0	0	0	0	0	66742007	67742007	0	0
	19	rs11581607	1	67242007	DYNLT5	66752459	66778787	0	0	0	0	0	66742007	67742007	0	0
	19	rs11581607	1	67242007	INSL5	66797741	66801256	0	0	0	0	0	66742007	67742007	0	0
	19	rs11581607	1	67242007	DNAI4	66812885	66924887	0	0	0	0	0	66742007	67742007	0	0
	19	rs11581607	1	67242007	MIER1	66924895	66988619	0	0	1	0	1	66742007	67742007	0	0
	19	rs11581607	1	67242007	SLC35D1	66999332	67054099	0	0	0	0	0	66742007	67742007	0	0
	19	rs11581607	1	67242007	IL23R	67166400	67259979	0	1	0	0	1	66742007	67742007	0	0
	19	rs11581607	1	67242007	IL12RB2	67307364	67396900	0	0	0	0	0	66742007	67742007	0	0
	19	rs11581607	1	67242007	SERBP1	67407810	67430415	0	0	0	0	0	66742007	67742007	0	0
	19	rs11581607	1	67242007	GADD45A	67685061	67688338	0	0	0	0	0	66742007	67742007	0	0
	19	rs11581607	1	67242007	GNG12	67701466	67833467	0	0	0	0	0	66742007	67742007	0	0
	20	rs3790566	1	67348757	IL12RB2	67307364	67396900	1	1	0	0	2	66848757	67848757	1	0
	20	rs3790566	1	67348757	DNAI4	66812885	66924887	0	0	0	0	0	66848757	67848757	0	0
	20	rs3790566	1	67348757	MIER1	66924895	66988619	0	0	0	0	0	66848757	67848757	0	0
	20	rs3790566	1	67348757	SLC35D1	66999332	67054099	0	0	0	0	0	66848757	67848757	0	0
	20	rs3790566	1	67348757	C1orf141	67092165	67231853	0	0	0	0	0	66848757	67848757	0	0
	20	rs3790566	1	67348757	IL23R	67166400	67259979	0	0	0	0	0	66848757	67848757	0	0
	20	rs3790566	1	67348757	SERBP1	67407810	67430415	0	0	0	0	0	66848757	67848757	0	0
	20	rs3790566	1	67348757	GADD45A	67685061	67688338	0	0	0	0	0	66848757	67848757	0	0
	20	rs3790566	1	67348757	GNG12	67701466	67833467	0	0	0	0	0	66848757	67848757	0	0
	21	rs34517439	1	77984833	FUBP1	77944055	77965004	0	1	1	0	2	77484833	78484833	1	0
	21	rs34517439	1	77984833	AK5	77282051	77559966	0	0	0	0	0	77484833	78484833	0	0
	21	rs34517439	1	77984833	ZZZ3	77562416	77683419	0	0	0	0	0	77484833	78484833	0	0
	21	rs34517439	1	77984833	USP33	77695987	77759852	0	0	0	0	0	77484833	78484833	0	0
	21	rs34517439	1	77984833	MIGA1	77779624	77878421	0	0	0	0	0	77484833	78484833	0	0
	21	rs34517439	1	77984833	NEXN	77888513	77943895	0	0	0	0	0	77484833	78484833	0	0
	21	rs34517439	1	77984833	DNAJB4	77979175	78017964	0	0	0	0	0	77484833	78484833	0	0
	21	rs34517439	1	77984833	GIPC2	77979542	78138449	1	0	0	0	1	77484833	78484833	0	0
	21	rs34517439	1	77984833	PTGFR	78364995	78539749	0	0	0	0	0	77484833	78484833	0	0
	22	rs3753841	1	102914362	COL11A1	102876467	103108496	1	1	1	1	4	102414362	103414362	1	1
	23	rs12740374	1	109274968	SORT1	109309570	109397951	0	1	1	0	2	108774968	109774968	1	0
	23	rs12740374	1	109274968	STXBP3	108746674	108809526	0	0	0	0	0	108774968	109774968	0	0
	23	rs12740374	1	109274968	AKNAD1	108815898	108963484	0	0	0	0	0	108774968	109774968	0	0
	23	rs12740374	1	109274968	GPSM2	108875350	108934545	0	0	0	0	0	108774968	109774968	0	0
	23	rs12740374	1	109274968	CLCC1	108929508	108963489	0	0	0	0	0	108774968	109774968	0	0
	23	rs12740374	1	109274968	WDR47	108970214	109042228	0	0	0	0	0	108774968	109774968	0	0
	23	rs12740374	1	109274968	TAF13	109062486	109076002	0	0	0	0	0	108774968	109774968	0	0
	23	rs12740374	1	109274968	TMEM167B	109089803	109096934	0	0	0	0	0	108774968	109774968	0	0
	23	rs12740374	1	109274968	CFAP276	109105951	109113857	0	0	0	0	0	108774968	109774968	0	0
	23	rs12740374	1	109274968	ELAPOR1	109113679	109206779	0	0	0	0	0	108774968	109774968	0	0
	23	rs12740374	1	109274968	SARS1	109213918	109238169	0	0	0	0	0	108774968	109774968	0	0
	23	rs12740374	1	109274968	CELSR2	109250019	109275750	0	0	1	0	1	108774968	109774968	0	0
	23	rs12740374	1	109274968	PSRC1	109279556	109283186	1	0	1	0	2	108774968	109774968	0	0
	23	rs12740374	1	109274968	MYBPHL	109292365	109307041	0	0	0	0	0	108774968	109774968	0	0
	23	rs12740374	1	109274968	PSMA5	109399031	109426440	0	0	0	0	0	108774968	109774968	0	0
	23	rs12740374	1	109274968	SYPL2	109466558	109482137	0	0	0	0	0	108774968	109774968	0	0
	23	rs12740374	1	109274968	ATXN7L2	109483479	109492804	0	0	0	0	0	108774968	109774968	0	0
	23	rs12740374	1	109274968	CYB561D1	109494052	109502932	0	0	0	0	0	108774968	109774968	0	0
	23	rs12740374	1	109274968	AMIGO1	109504175	109509738	0	0	0	0	0	108774968	109774968	0	0
	23	rs12740374	1	109274968	GPR61	109539872	109548406	0	0	0	0	0	108774968	109774968	0	0
	23	rs12740374	1	109274968	GNAI3	109548611	109594353	0	0	0	0	0	108774968	109774968	0	0
	23	rs12740374	1	109274968	GNAT2	109603267	109613057	0	0	0	0	0	108774968	109774968	0	0
	23	rs12740374	1	109274968	AMPD2	109616104	109632051	0	0	0	0	0	108774968	109774968	0	0
	23	rs12740374	1	109274968	GSTM4	109656081	109665496	0	0	0	0	0	108774968	109774968	0	0
	23	rs12740374	1	109274968	GSTM2	109668022	109709549	0	0	0	0	0	108774968	109774968	0	0
	23	rs12740374	1	109274968	GSTM1	109687814	109709039	0	0	0	0	0	108774968	109774968	0	0
	23	rs12740374	1	109274968	GSTM5	109712242	109775428	0	0	0	0	0	108774968	109774968	0	0
	23	rs12740374	1	109274968	GSTM3	109733932	109741762	0	0	0	0	0	108774968	109774968	0	0
	23	rs12740374	1	109274968	EPS8L3	109750080	109764027	0	0	0	0	0	108774968	109774968	0	0
	24	rs2360019	1	118553782	SPAG17	117953861	118185223	1	0	0	0	1	118053782	119053782	0	0
	24	rs2360019	1	118553782	TBX15	118883046	118989556	0	0	0	0	0	118053782	119053782	0	0
	24	rs2360019	1	118553782	WARS2	119031216	119140671	0	1	0	0	1	118053782	119053782	0	0
	25	rs116062645	1	119982857	HSD3B1	119507198	119515058	0	0	0	0	0	119482857	120482857	0	0
	25	rs116062645	1	119982857	ZNF697	119619422	119647773	0	0	0	0	0	119482857	120482857	0	0
	25	rs116062645	1	119982857	PHGDH	119659798	119744215	0	0	0	0	0	119482857	120482857	0	0
	25	rs116062645	1	119982857	HMGCS2	119747996	119768905	0	0	0	0	0	119482857	120482857	0	0
	25	rs116062645	1	119982857	REG4	119794018	119811660	0	0	0	0	0	119482857	120482857	0	0
	25	rs116062645	1	119982857	ADAM30	119893533	119896495	1	0	0	0	1	119482857	120482857	0	0
	25	rs116062645	1	119982857	NOTCH2	119911553	120041069	0	0	0	0	0	119482857	120482857	0	0
	26	rs11205303	1	149934520	MTMR11	149928651	149932957	1	1	1	1	4	149434520	150434520	1	1
	26	rs11205303	1	149934520	FCGR1A	149782671	149792518	0	0	0	0	0	149434520	150434520	0	1
	26	rs11205303	1	149934520	H2BC18	149782689	149800940	0	0	1	0	1	149434520	150434520	0	1
	26	rs11205303	1	149934520	H3C13	149813271	149813681	0	0	1	0	1	149434520	150434520	0	1
	26	rs11205303	1	149934520	H3C14	149839538	149841193	0	0	0	0	0	149434520	150434520	0	1
	26	rs11205303	1	149934520	H3C15	149852619	149854274	0	0	0	0	0	149434520	150434520	0	1
	26	rs11205303	1	149934520	H2BC21	149884460	149886682	0	0	0	0	0	149434520	150434520	0	1
	26	rs11205303	1	149934520	H2AC20	149886975	149887411	0	0	0	0	0	149434520	150434520	0	1
	26	rs11205303	1	149934520	H2AC21	149887469	149887916	0	0	0	0	0	149434520	150434520	0	1
	26	rs11205303	1	149934520	BOLA1	149896141	149900798	0	0	0	0	0	149434520	150434520	0	1
	26	rs11205303	1	149934520	SV2A	149903318	149917882	0	0	1	0	1	149434520	150434520	0	1
	26	rs11205303	1	149934520	SF3B4	149923317	149928344	0	0	0	0	0	149434520	150434520	0	1
	26	rs11205303	1	149934520	VPS45	150103070	150110399	0	0	1	0	1	149434520	150434520	0	1
	26	rs11205303	1	149934520	PLEKHO1	150153918	150158531	0	0	0	0	0	149434520	150434520	0	1
	26	rs11205303	1	149934520	ANP32E	150226008	150228713	0	0	0	0	0	149434520	150434520	0	1
	26	rs11205303	1	149934520	CA14	150257159	150260751	0	0	0	0	0	149434520	150434520	0	1
	26	rs11205303	1	149934520	APH1A	150265404	150269580	0	0	0	0	0	149434520	150434520	0	1
	26	rs11205303	1	149934520	C1orf54	150270996	150274599	0	0	0	0	0	149434520	150434520	0	1
	26	rs11205303	1	149934520	CIART	150282543	150285522	0	0	0	0	0	149434520	150434520	0	1
	26	rs11205303	1	149934520	PRPF3	150338075	150353195	0	0	0	0	0	149434520	150434520	0	1
	26	rs11205303	1	149934520	RPRD2	150363091	150476566	0	0	0	0	0	149434520	150434520	0	1
	27	rs12048493	1	149955122	FCGR1A	149782671	149792518	0	0	0	0	0	149455122	150455122	0	0
	27	rs12048493	1	149955122	H2BC18	149782689	149800940	0	0	0	0	0	149455122	150455122	0	0
	27	rs12048493	1	149955122	H3C13	149813271	149813681	0	0	0	0	0	149455122	150455122	0	0
	27	rs12048493	1	149955122	H3C14	149839538	149841193	0	0	0	0	0	149455122	150455122	0	0
	27	rs12048493	1	149955122	H3C15	149852619	149854274	0	0	0	0	0	149455122	150455122	0	0
	27	rs12048493	1	149955122	H2BC21	149884460	149886682	0	0	0	0	0	149455122	150455122	0	0
	27	rs12048493	1	149955122	H2AC20	149886975	149887411	0	0	0	0	0	149455122	150455122	0	0
	27	rs12048493	1	149955122	H2AC21	149887469	149887916	0	0	0	0	0	149455122	150455122	0	0
	27	rs12048493	1	149955122	BOLA1	149896141	149900798	0	0	0	0	0	149455122	150455122	0	0
	27	rs12048493	1	149955122	SV2A	149903318	149917882	0	1	0	0	1	149455122	150455122	0	0
	27	rs12048493	1	149955122	SF3B4	149923317	149928344	0	0	0	0	0	149455122	150455122	0	0
	27	rs12048493	1	149955122	MTMR11	149928651	149932957	1	0	0	0	1	149455122	150455122	0	0
	27	rs12048493	1	149955122	VPS45	150103070	150110399	0	0	0	0	0	149455122	150455122	0	0
	27	rs12048493	1	149955122	PLEKHO1	150153918	150158531	0	0	0	0	0	149455122	150455122	0	0
	27	rs12048493	1	149955122	ANP32E	150226008	150228713	0	0	0	0	0	149455122	150455122	0	0
	27	rs12048493	1	149955122	CA14	150257159	150260751	0	0	0	0	0	149455122	150455122	0	0
	27	rs12048493	1	149955122	APH1A	150265404	150269580	0	0	0	0	0	149455122	150455122	0	0
	27	rs12048493	1	149955122	C1orf54	150270996	150274599	0	0	0	0	0	149455122	150455122	0	0
	27	rs12048493	1	149955122	CIART	150282543	150285522	0	0	0	0	0	149455122	150455122	0	0
	27	rs12048493	1	149955122	PRPF3	150338075	150353195	0	0	0	0	0	149455122	150455122	0	0
	27	rs12048493	1	149955122	RPRD2	150363091	150476566	0	0	0	0	0	149455122	150455122	0	0
	28	rs12023748	1	149969301	MTMR11	149928651	149932957	1	1	1	0	3	149469301	150469301	1	0
	28	rs12023748	1	149969301	FCGR1A	149782671	149792518	0	0	1	0	1	149469301	150469301	0	0
	28	rs12023748	1	149969301	H2BC18	149782689	149800940	0	0	0	0	0	149469301	150469301	0	0
	28	rs12023748	1	149969301	H3C13	149813271	149813681	0	0	0	0	0	149469301	150469301	0	0
	28	rs12023748	1	149969301	H3C14	149839538	149841193	0	0	0	0	0	149469301	150469301	0	0
	28	rs12023748	1	149969301	H3C15	149852619	149854274	0	0	0	0	0	149469301	150469301	0	0
	28	rs12023748	1	149969301	H2BC21	149884460	149886682	0	0	0	0	0	149469301	150469301	0	0
	28	rs12023748	1	149969301	H2AC20	149886975	149887411	0	0	0	0	0	149469301	150469301	0	0
	28	rs12023748	1	149969301	H2AC21	149887469	149887916	0	0	0	0	0	149469301	150469301	0	0
	28	rs12023748	1	149969301	BOLA1	149896141	149900798	0	0	0	0	0	149469301	150469301	0	0
	28	rs12023748	1	149969301	SV2A	149903318	149917882	0	0	0	0	0	149469301	150469301	0	0
	28	rs12023748	1	149969301	SF3B4	149923317	149928344	0	0	0	0	0	149469301	150469301	0	0
	28	rs12023748	1	149969301	VPS45	150103070	150110399	0	0	0	0	0	149469301	150469301	0	0
	28	rs12023748	1	149969301	PLEKHO1	150153918	150158531	0	0	0	0	0	149469301	150469301	0	0
	28	rs12023748	1	149969301	ANP32E	150226008	150228713	0	0	0	0	0	149469301	150469301	0	0
	28	rs12023748	1	149969301	CA14	150257159	150260751	0	0	0	0	0	149469301	150469301	0	0
	28	rs12023748	1	149969301	APH1A	150265404	150269580	0	0	0	0	0	149469301	150469301	0	0
	28	rs12023748	1	149969301	C1orf54	150270996	150274599	0	0	0	0	0	149469301	150469301	0	0
	28	rs12023748	1	149969301	CIART	150282543	150285522	0	0	0	0	0	149469301	150469301	0	0
	28	rs12023748	1	149969301	PRPF3	150338075	150353195	0	0	0	0	0	149469301	150469301	0	0
	28	rs12023748	1	149969301	RPRD2	150363091	150476566	0	0	0	0	0	149469301	150469301	0	0
	29	rs11577346	1	150094433	PLEKHO1	150153918	150158531	0	1	1	0	2	149594433	150594433	1	0
	29	rs11577346	1	150094433	FCGR1A	149782671	149792518	0	0	0	0	0	149594433	150594433	0	0
	29	rs11577346	1	150094433	H2BC18	149782689	149800940	0	0	0	0	0	149594433	150594433	0	0
	29	rs11577346	1	150094433	H3C13	149813271	149813681	0	0	0	0	0	149594433	150594433	0	0
	29	rs11577346	1	150094433	H3C14	149839538	149841193	0	0	0	0	0	149594433	150594433	0	0
	29	rs11577346	1	150094433	H3C15	149852619	149854274	0	0	0	0	0	149594433	150594433	0	0
	29	rs11577346	1	150094433	H2BC21	149884460	149886682	0	0	0	0	0	149594433	150594433	0	0
	29	rs11577346	1	150094433	H2AC20	149886975	149887411	0	0	0	0	0	149594433	150594433	0	0
	29	rs11577346	1	150094433	H2AC21	149887469	149887916	0	0	0	0	0	149594433	150594433	0	0
	29	rs11577346	1	150094433	BOLA1	149896141	149900798	0	0	0	0	0	149594433	150594433	0	0
	29	rs11577346	1	150094433	SV2A	149903318	149917882	0	0	1	0	1	149594433	150594433	0	0
	29	rs11577346	1	150094433	SF3B4	149923317	149928344	0	0	0	0	0	149594433	150594433	0	0
	29	rs11577346	1	150094433	MTMR11	149928651	149932957	0	0	1	0	1	149594433	150594433	0	0
	29	rs11577346	1	150094433	VPS45	150103070	150110399	1	0	1	0	2	149594433	150594433	0	0
	29	rs11577346	1	150094433	ANP32E	150226008	150228713	0	0	0	0	0	149594433	150594433	0	0
	29	rs11577346	1	150094433	CA14	150257159	150260751	0	0	0	0	0	149594433	150594433	0	0
	29	rs11577346	1	150094433	APH1A	150265404	150269580	0	0	0	0	0	149594433	150594433	0	0
	29	rs11577346	1	150094433	C1orf54	150270996	150274599	0	0	1	0	1	149594433	150594433	0	0
	29	rs11577346	1	150094433	CIART	150282543	150285522	0	0	0	0	0	149594433	150594433	0	0
	29	rs11577346	1	150094433	PRPF3	150338075	150353195	0	0	0	0	0	149594433	150594433	0	0
	29	rs11577346	1	150094433	RPRD2	150363091	150476566	0	0	1	0	1	149594433	150594433	0	0
	29	rs11577346	1	150094433	TARS2	150487411	150507602	0	0	0	0	0	149594433	150594433	0	0
	29	rs11577346	1	150094433	ECM1	150508062	150513789	0	0	1	0	1	149594433	150594433	0	0
	29	rs11577346	1	150094433	ADAMTSL4	150549408	150560937	0	0	0	0	0	149594433	150594433	0	0
	29	rs11577346	1	150094433	MCL1	150574556	150579590	0	0	0	0	0	149594433	150594433	0	0
	30	rs372839783	1	150716783	GOLPH3L	150646225	150697154	0	1	1	0	2	150216783	151216783	1	1
	30	rs372839783	1	150716783	ANP32E	150226008	150228713	0	0	0	0	0	150216783	151216783	0	1
	30	rs372839783	1	150716783	CA14	150257159	150260751	0	0	0	0	0	150216783	151216783	0	1
	30	rs372839783	1	150716783	APH1A	150265404	150269580	0	0	0	0	0	150216783	151216783	0	1
	30	rs372839783	1	150716783	C1orf54	150270996	150274599	0	0	0	0	0	150216783	151216783	0	1
	30	rs372839783	1	150716783	CIART	150282543	150285522	0	0	0	0	0	150216783	151216783	0	1
	30	rs372839783	1	150716783	PRPF3	150338075	150353195	0	0	0	0	0	150216783	151216783	0	1
	30	rs372839783	1	150716783	RPRD2	150363091	150476566	0	0	1	0	1	150216783	151216783	0	1
	30	rs372839783	1	150716783	TARS2	150487411	150507602	0	0	1	0	1	150216783	151216783	0	1
	30	rs372839783	1	150716783	ECM1	150508062	150513789	0	0	1	0	1	150216783	151216783	0	1
	30	rs372839783	1	150716783	ADAMTSL4	150549408	150560937	0	0	0	0	0	150216783	151216783	0	1
	30	rs372839783	1	150716783	MCL1	150574556	150579590	0	0	1	0	1	150216783	151216783	0	1
	30	rs372839783	1	150716783	ENSA	150600851	150629612	0	0	1	0	1	150216783	151216783	0	1
	30	rs372839783	1	150716783	HORMAD1	150698060	150720888	1	0	1	0	2	150216783	151216783	0	1
	30	rs372839783	1	150716783	CTSS	150730196	150765957	0	0	1	0	1	150216783	151216783	0	1
	30	rs372839783	1	150716783	CTSK	150796208	150808323	0	0	1	0	1	150216783	151216783	0	1
	30	rs372839783	1	150716783	ARNT	150809705	150876768	0	0	1	0	1	150216783	151216783	0	1
	30	rs372839783	1	150716783	SETDB1	150926263	150964737	0	0	1	0	1	150216783	151216783	0	1
	30	rs372839783	1	150716783	CERS2	150960583	150975003	0	0	1	0	1	150216783	151216783	0	1
	30	rs372839783	1	150716783	ANXA9	150982017	150995634	0	0	1	0	1	150216783	151216783	0	1
	30	rs372839783	1	150716783	MINDY1	150996549	151008375	0	0	1	0	1	150216783	151216783	0	1
	30	rs372839783	1	150716783	PRUNE1	151008420	151035713	0	0	0	0	0	150216783	151216783	0	1
	30	rs372839783	1	150716783	BNIPL	151036570	151047600	0	0	0	0	0	150216783	151216783	0	1
	30	rs372839783	1	150716783	C1orf56	151047740	151051986	0	0	0	0	0	150216783	151216783	0	1
	30	rs372839783	1	150716783	CDC42SE1	151050971	151070325	0	0	0	0	0	150216783	151216783	0	1
	30	rs372839783	1	150716783	MLLT11	151057758	151068494	0	0	0	0	0	150216783	151216783	0	1
	30	rs372839783	1	150716783	GABPB2	151070578	151125542	0	0	0	0	0	150216783	151216783	0	1
	30	rs372839783	1	150716783	SEMA6C	151131685	151146628	0	0	0	0	0	150216783	151216783	0	1
	30	rs372839783	1	150716783	TNFAIP8L2	151156629	151159749	0	0	0	0	0	150216783	151216783	0	1
	30	rs372839783	1	150716783	SCNM1	151156664	151170297	0	0	0	0	0	150216783	151216783	0	1
	30	rs372839783	1	150716783	LYSMD1	151159748	151165948	0	0	0	0	0	150216783	151216783	0	1
	30	rs372839783	1	150716783	TMOD4	151169986	151176284	0	0	0	0	0	150216783	151216783	0	1
	30	rs372839783	1	150716783	VPS72	151169987	151195321	0	0	0	0	0	150216783	151216783	0	1
	30	rs372839783	1	150716783	PIP5K1A	151197949	151249536	0	0	0	0	0	150216783	151216783	0	1
	31	rs11204894	1	151820698	TDRKH	151770107	151791416	0	1	1	0	2	151320698	152320698	1	0
	31	rs11204894	1	151820698	PI4KB	151291797	151327715	0	0	0	0	0	151320698	152320698	0	0
	31	rs11204894	1	151820698	RFX5	151340640	151347357	0	0	0	0	0	151320698	152320698	0	0
	31	rs11204894	1	151820698	SELENBP1	151364302	151372733	0	0	0	0	0	151320698	152320698	0	0
	31	rs11204894	1	151820698	PSMB4	151399534	151401944	0	0	0	0	0	151320698	152320698	0	0
	31	rs11204894	1	151820698	POGZ	151402724	151459465	0	0	0	0	0	151320698	152320698	0	0
	31	rs11204894	1	151820698	CGN	151510510	151538692	0	0	0	0	0	151320698	152320698	0	0
	31	rs11204894	1	151820698	TUFT1	151540305	151583583	0	0	1	0	1	151320698	152320698	0	0
	31	rs11204894	1	151820698	SNX27	151612065	151699091	0	0	0	0	0	151320698	152320698	0	0
	31	rs11204894	1	151820698	CELF3	151702404	151716814	0	0	0	0	0	151320698	152320698	0	0
	31	rs11204894	1	151820698	RIIAD1	151710433	151729805	0	0	1	0	1	151320698	152320698	0	0
	31	rs11204894	1	151820698	MRPL9	151759643	151763564	0	0	1	0	1	151320698	152320698	0	0
	31	rs11204894	1	151820698	OAZ3	151762969	151771332	0	0	0	0	0	151320698	152320698	0	0
	31	rs11204894	1	151820698	LINGO4	151800264	151806154	0	0	1	0	1	151320698	152320698	0	0
	31	rs11204894	1	151820698	RORC	151806071	151831872	1	0	0	0	1	151320698	152320698	0	0
	31	rs11204894	1	151820698	C2CD4D	151837819	151840557	0	0	1	0	1	151320698	152320698	0	0
	31	rs11204894	1	151820698	THEM5	151847263	151853697	0	0	0	0	0	151320698	152320698	0	0
	31	rs11204894	1	151820698	THEM4	151873584	151909808	0	0	0	0	0	151320698	152320698	0	0
	31	rs11204894	1	151820698	S100A10	151982915	151994390	0	0	0	0	0	151320698	152320698	0	0
	31	rs11204894	1	151820698	S100A11	152032506	152047907	0	0	0	0	0	151320698	152320698	0	0
	31	rs11204894	1	151820698	TCHHL1	152084144	152089064	0	0	0	0	0	151320698	152320698	0	0
	31	rs11204894	1	151820698	TCHH	152106317	152114080	0	0	0	0	0	151320698	152320698	0	0
	31	rs11204894	1	151820698	RPTN	152153595	152159228	0	0	0	0	0	151320698	152320698	0	0
	31	rs11204894	1	151820698	HRNR	152212082	152224193	0	0	0	0	0	151320698	152320698	0	0
	31	rs11204894	1	151820698	FLG	152302175	152325203	0	0	0	0	0	151320698	152320698	0	0
	32	rs11589479	1	155060832	ADAM15	155050566	155062776	0	1	1	1	3	154560832	155560832	1	0
	32	rs11589479	1	155060832	CHRNB2	154567781	154580026	0	0	0	0	0	154560832	155560832	0	0
	32	rs11589479	1	155060832	ADAR	154582062	154627999	0	0	0	0	0	154560832	155560832	0	0
	32	rs11589479	1	155060832	KCNN3	154697455	154870280	0	0	0	0	0	154560832	155560832	0	0
	32	rs11589479	1	155060832	PMVK	154924734	154936991	0	0	0	0	0	154560832	155560832	0	0
	32	rs11589479	1	155060832	PBXIP1	154944076	154956123	0	0	0	0	0	154560832	155560832	0	0
	32	rs11589479	1	155060832	PYGO2	154957026	154963853	0	0	0	0	0	154560832	155560832	0	0
	32	rs11589479	1	155060832	SHC1	154962298	154974395	0	0	0	0	0	154560832	155560832	0	0
	32	rs11589479	1	155060832	CKS1B	154974653	154979249	0	0	0	0	0	154560832	155560832	0	0
	32	rs11589479	1	155060832	FLAD1	154983338	154993111	0	0	0	0	0	154560832	155560832	0	0
	32	rs11589479	1	155060832	LENEP	154993586	154994315	0	0	0	0	0	154560832	155560832	0	0
	32	rs11589479	1	155060832	ZBTB7B	155002651	155018522	0	0	0	0	0	154560832	155560832	0	0
	32	rs11589479	1	155060832	DCST2	155018520	155033781	0	0	0	0	0	154560832	155560832	0	0
	32	rs11589479	1	155060832	DCST1	155033824	155050930	0	0	0	0	0	154560832	155560832	0	0
	32	rs11589479	1	155060832	EFNA4	155063731	155069553	1	0	0	0	1	154560832	155560832	0	0
	32	rs11589479	1	155060832	EFNA3	155063748	155087538	0	0	0	0	0	154560832	155560832	0	0
	32	rs11589479	1	155060832	ENSG00000251246	155063748	155086807	0	0	0	0	0	154560832	155560832	0	0
	32	rs11589479	1	155060832	EFNA1	155127460	155134857	0	0	1	0	1	154560832	155560832	0	0
	32	rs11589479	1	155060832	SLC50A1	155135344	155138853	0	0	0	0	0	154560832	155560832	0	0
	32	rs11589479	1	155060832	DPM3	155139891	155140595	0	0	0	0	0	154560832	155560832	0	0
	32	rs11589479	1	155060832	KRTCAP2	155169408	155173475	0	0	0	0	0	154560832	155560832	0	0
	32	rs11589479	1	155060832	TRIM46	155173397	155184971	0	0	0	0	0	154560832	155560832	0	0
	32	rs11589479	1	155060832	MUC1	155185824	155188810	0	0	1	0	1	154560832	155560832	0	0
	32	rs11589479	1	155060832	THBS3	155195588	155209051	0	0	1	0	1	154560832	155560832	0	0
	32	rs11589479	1	155060832	MTX1	155208699	155213824	0	0	0	0	0	154560832	155560832	0	0
	32	rs11589479	1	155060832	GBA1	155234452	155244699	0	0	1	0	1	154560832	155560832	0	0
	32	rs11589479	1	155060832	ENTREP3	155247205	155255483	0	0	1	0	1	154560832	155560832	0	0
	32	rs11589479	1	155060832	SCAMP3	155255979	155262430	0	0	1	0	1	154560832	155560832	0	0
	32	rs11589479	1	155060832	CLK2	155262868	155278491	0	0	0	0	0	154560832	155560832	0	0
	32	rs11589479	1	155060832	HCN3	155277583	155289848	0	0	1	0	1	154560832	155560832	0	0
	32	rs11589479	1	155060832	PKLR	155289839	155301434	0	0	0	0	0	154560832	155560832	0	0
	32	rs11589479	1	155060832	FDPS	155308748	155320666	0	0	0	0	0	154560832	155560832	0	0
	32	rs11589479	1	155060832	RUSC1	155320896	155331114	0	0	0	0	0	154560832	155560832	0	0
	32	rs11589479	1	155060832	ASH1L	155335268	155562807	0	0	0	0	0	154560832	155560832	0	0
	33	rs11264341	1	155179017	KCNN3	154697455	154870280	0	0	0	0	0	154679017	155679017	0	0
	33	rs11264341	1	155179017	PMVK	154924734	154936991	0	0	0	0	0	154679017	155679017	0	0
	33	rs11264341	1	155179017	PBXIP1	154944076	154956123	0	0	0	0	0	154679017	155679017	0	0
	33	rs11264341	1	155179017	PYGO2	154957026	154963853	0	0	0	0	0	154679017	155679017	0	0
	33	rs11264341	1	155179017	SHC1	154962298	154974395	0	0	0	0	0	154679017	155679017	0	0
	33	rs11264341	1	155179017	CKS1B	154974653	154979249	0	0	0	0	0	154679017	155679017	0	0
	33	rs11264341	1	155179017	FLAD1	154983338	154993111	0	0	0	0	0	154679017	155679017	0	0
	33	rs11264341	1	155179017	LENEP	154993586	154994315	0	0	0	0	0	154679017	155679017	0	0
	33	rs11264341	1	155179017	ZBTB7B	155002651	155018522	0	0	0	0	0	154679017	155679017	0	0
	33	rs11264341	1	155179017	DCST2	155018520	155033781	0	0	1	0	1	154679017	155679017	0	0
	33	rs11264341	1	155179017	DCST1	155033824	155050930	0	0	0	0	0	154679017	155679017	0	0
	33	rs11264341	1	155179017	ADAM15	155050566	155062776	0	1	0	0	1	154679017	155679017	0	0
	33	rs11264341	1	155179017	EFNA4	155063731	155069553	0	0	0	0	0	154679017	155679017	0	0
	33	rs11264341	1	155179017	EFNA3	155063748	155087538	0	0	0	0	0	154679017	155679017	0	0
	33	rs11264341	1	155179017	ENSG00000251246	155063748	155086807	0	0	0	0	0	154679017	155679017	0	0
	33	rs11264341	1	155179017	EFNA1	155127460	155134857	0	0	1	0	1	154679017	155679017	0	0
	33	rs11264341	1	155179017	SLC50A1	155135344	155138853	0	0	0	0	0	154679017	155679017	0	0
	33	rs11264341	1	155179017	DPM3	155139891	155140595	0	0	0	0	0	154679017	155679017	0	0
	33	rs11264341	1	155179017	KRTCAP2	155169408	155173475	0	0	0	0	0	154679017	155679017	0	0
	33	rs11264341	1	155179017	TRIM46	155173397	155184971	1	0	0	0	1	154679017	155679017	0	0
	33	rs11264341	1	155179017	MUC1	155185824	155188810	0	0	1	0	1	154679017	155679017	0	0
	33	rs11264341	1	155179017	THBS3	155195588	155209051	0	0	1	0	1	154679017	155679017	0	0
	33	rs11264341	1	155179017	MTX1	155208699	155213824	0	0	0	0	0	154679017	155679017	0	0
	33	rs11264341	1	155179017	GBA1	155234452	155244699	0	0	1	0	1	154679017	155679017	0	0
	33	rs11264341	1	155179017	ENTREP3	155247205	155255483	0	0	0	0	0	154679017	155679017	0	0
	33	rs11264341	1	155179017	SCAMP3	155255979	155262430	0	0	0	0	0	154679017	155679017	0	0
	33	rs11264341	1	155179017	CLK2	155262868	155278491	0	0	0	0	0	154679017	155679017	0	0
	33	rs11264341	1	155179017	HCN3	155277583	155289848	0	0	0	0	0	154679017	155679017	0	0
	33	rs11264341	1	155179017	PKLR	155289839	155301434	0	0	0	0	0	154679017	155679017	0	0
	33	rs11264341	1	155179017	FDPS	155308748	155320666	0	0	0	0	0	154679017	155679017	0	0
	33	rs11264341	1	155179017	RUSC1	155320896	155331114	0	0	0	0	0	154679017	155679017	0	0
	33	rs11264341	1	155179017	ASH1L	155335268	155562807	0	0	0	0	0	154679017	155679017	0	0
	33	rs11264341	1	155179017	MSTO1	155610188	155748362	0	0	0	0	0	154679017	155679017	0	0
	33	rs11264341	1	155179017	YY1AP1	155659446	155689000	0	0	0	0	0	154679017	155679017	0	0
	34	rs41314549	1	155320440	FDPS	155308748	155320666	0	1	0	1	2	154820440	155820440	1	0
	34	rs41314549	1	155320440	KCNN3	154697455	154870280	0	0	0	0	0	154820440	155820440	0	0
	34	rs41314549	1	155320440	PMVK	154924734	154936991	0	0	0	0	0	154820440	155820440	0	0
	34	rs41314549	1	155320440	PBXIP1	154944076	154956123	0	0	0	0	0	154820440	155820440	0	0
	34	rs41314549	1	155320440	PYGO2	154957026	154963853	0	0	0	0	0	154820440	155820440	0	0
	34	rs41314549	1	155320440	SHC1	154962298	154974395	0	0	0	0	0	154820440	155820440	0	0
	34	rs41314549	1	155320440	CKS1B	154974653	154979249	0	0	0	0	0	154820440	155820440	0	0
	34	rs41314549	1	155320440	FLAD1	154983338	154993111	0	0	0	0	0	154820440	155820440	0	0
	34	rs41314549	1	155320440	LENEP	154993586	154994315	0	0	0	0	0	154820440	155820440	0	0
	34	rs41314549	1	155320440	ZBTB7B	155002651	155018522	0	0	1	0	1	154820440	155820440	0	0
	34	rs41314549	1	155320440	DCST2	155018520	155033781	0	0	0	0	0	154820440	155820440	0	0
	34	rs41314549	1	155320440	DCST1	155033824	155050930	0	0	0	0	0	154820440	155820440	0	0
	34	rs41314549	1	155320440	ADAM15	155050566	155062776	0	0	1	0	1	154820440	155820440	0	0
	34	rs41314549	1	155320440	EFNA4	155063731	155069553	0	0	0	0	0	154820440	155820440	0	0
	34	rs41314549	1	155320440	EFNA3	155063748	155087538	0	0	0	0	0	154820440	155820440	0	0
	34	rs41314549	1	155320440	ENSG00000251246	155063748	155086807	0	0	0	0	0	154820440	155820440	0	0
	34	rs41314549	1	155320440	EFNA1	155127460	155134857	0	0	0	0	0	154820440	155820440	0	0
	34	rs41314549	1	155320440	SLC50A1	155135344	155138853	0	0	0	0	0	154820440	155820440	0	0
	34	rs41314549	1	155320440	DPM3	155139891	155140595	0	0	0	0	0	154820440	155820440	0	0
	34	rs41314549	1	155320440	KRTCAP2	155169408	155173475	0	0	0	0	0	154820440	155820440	0	0
	34	rs41314549	1	155320440	TRIM46	155173397	155184971	0	0	0	0	0	154820440	155820440	0	0
	34	rs41314549	1	155320440	MUC1	155185824	155188810	0	0	1	0	1	154820440	155820440	0	0
	34	rs41314549	1	155320440	THBS3	155195588	155209051	0	0	1	0	1	154820440	155820440	0	0
	34	rs41314549	1	155320440	MTX1	155208699	155213824	0	0	1	0	1	154820440	155820440	0	0
	34	rs41314549	1	155320440	GBA1	155234452	155244699	0	0	1	0	1	154820440	155820440	0	0
	34	rs41314549	1	155320440	ENTREP3	155247205	155255483	0	0	0	0	0	154820440	155820440	0	0
	34	rs41314549	1	155320440	SCAMP3	155255979	155262430	0	0	0	0	0	154820440	155820440	0	0
	34	rs41314549	1	155320440	CLK2	155262868	155278491	0	0	0	0	0	154820440	155820440	0	0
	34	rs41314549	1	155320440	HCN3	155277583	155289848	0	0	0	0	0	154820440	155820440	0	0
	34	rs41314549	1	155320440	PKLR	155289839	155301434	0	0	0	0	0	154820440	155820440	0	0
	34	rs41314549	1	155320440	RUSC1	155320896	155331114	1	0	1	0	2	154820440	155820440	0	0
	34	rs41314549	1	155320440	ASH1L	155335268	155562807	0	0	0	0	0	154820440	155820440	0	0
	34	rs41314549	1	155320440	MSTO1	155610188	155748362	0	0	0	0	0	154820440	155820440	0	0
	34	rs41314549	1	155320440	YY1AP1	155659446	155689000	0	0	0	0	0	154820440	155820440	0	0
	34	rs41314549	1	155320440	DAP3	155687960	155739010	0	0	0	0	0	154820440	155820440	0	0
	34	rs41314549	1	155320440	GON4L	155749717	155859400	0	0	0	0	0	154820440	155820440	0	0
	35	rs2842873	1	156234862	PMF1	156212993	156243083	0	1	1	0	2	155734862	156734862	1	0
	35	rs2842873	1	156234862	MSTO1	155610188	155748362	0	0	1	0	1	155734862	156734862	0	0
	35	rs2842873	1	156234862	DAP3	155687960	155739010	0	0	0	0	0	155734862	156734862	0	0
	35	rs2842873	1	156234862	GON4L	155749717	155859400	0	0	0	0	0	155734862	156734862	0	0
	35	rs2842873	1	156234862	SYT11	155859509	155885199	0	0	0	0	0	155734862	156734862	0	0
	35	rs2842873	1	156234862	RIT1	155897808	155911404	0	0	1	0	1	155734862	156734862	0	0
	35	rs2842873	1	156234862	KHDC4	155913043	155934400	0	0	0	0	0	155734862	156734862	0	0
	35	rs2842873	1	156234862	RXFP4	155941689	155942834	0	0	0	0	0	155734862	156734862	0	0
	35	rs2842873	1	156234862	ARHGEF2	155946839	156007070	0	0	0	0	0	155734862	156734862	0	0
	35	rs2842873	1	156234862	SSR2	156009048	156020959	0	0	0	0	0	155734862	156734862	0	0
	35	rs2842873	1	156234862	UBQLN4	156035301	156053794	0	0	0	0	0	155734862	156734862	0	0
	35	rs2842873	1	156234862	LAMTOR2	156054752	156058510	0	0	0	0	0	155734862	156734862	0	0
	35	rs2842873	1	156234862	RAB25	156061160	156070504	0	0	0	0	0	155734862	156734862	0	0
	35	rs2842873	1	156234862	MEX3A	156072013	156081998	0	0	0	0	0	155734862	156734862	0	0
	35	rs2842873	1	156234862	LMNA	156082573	156140089	0	0	0	0	0	155734862	156734862	0	0
	35	rs2842873	1	156234862	SEMA4A	156147366	156177752	0	0	0	0	0	155734862	156734862	0	0
	35	rs2842873	1	156234862	SLC25A44	156194089	156212796	0	0	1	0	1	155734862	156734862	0	0
	35	rs2842873	1	156234862	BGLAP	156241962	156243321	1	0	1	0	2	155734862	156734862	0	0
	35	rs2842873	1	156234862	PAQR6	156243415	156248090	0	0	1	0	1	155734862	156734862	0	0
	35	rs2842873	1	156234862	SMG5	156249224	156282829	0	0	1	0	1	155734862	156734862	0	0
	35	rs2842873	1	156234862	TMEM79	156282935	156293185	0	0	0	0	0	155734862	156734862	0	0
	35	rs2842873	1	156234862	GLMP	156290089	156295672	0	0	0	0	0	155734862	156734862	0	0
	35	rs2842873	1	156234862	VHLL	156298624	156299637	0	0	0	0	0	155734862	156734862	0	0
	35	rs2842873	1	156234862	CCT3	156308968	156367873	0	0	0	0	0	155734862	156734862	0	0
	35	rs2842873	1	156234862	TSACC	156337314	156346995	0	0	0	0	0	155734862	156734862	0	0
	35	rs2842873	1	156234862	RHBG	156369212	156384556	0	0	0	0	0	155734862	156734862	0	0
	35	rs2842873	1	156234862	MIR9-1HG	156404250	156430701	0	0	0	0	0	155734862	156734862	0	0
	35	rs2842873	1	156234862	MEF2D	156463727	156500828	0	0	0	0	0	155734862	156734862	0	0
	35	rs2842873	1	156234862	IQGAP3	156525405	156572604	0	0	0	0	0	155734862	156734862	0	0
	35	rs2842873	1	156234862	TTC24	156579727	156586770	0	0	0	0	0	155734862	156734862	0	0
	35	rs2842873	1	156234862	NAXE	156591762	156594299	0	0	0	0	0	155734862	156734862	0	0
	35	rs2842873	1	156234862	GPATCH4	156594487	156601496	0	0	0	0	0	155734862	156734862	0	0
	35	rs2842873	1	156234862	HAPLN2	156619294	156625725	0	0	0	0	0	155734862	156734862	0	0
	35	rs2842873	1	156234862	BCAN	156641390	156659532	0	0	0	0	0	155734862	156734862	0	0
	35	rs2842873	1	156234862	NES	156668763	156677397	0	0	0	0	0	155734862	156734862	0	0
	35	rs2842873	1	156234862	CRABP2	156699606	156705816	0	0	0	0	0	155734862	156734862	0	0
	35	rs2842873	1	156234862	ISG20L2	156721891	156728799	0	0	0	0	0	155734862	156734862	0	0
	35	rs2842873	1	156234862	METTL25B	156728442	156736960	0	0	0	0	0	155734862	156734862	0	0
	36	rs34687326	1	159830120	SLAMF8	159826750	159837249	1	1	0	1	3	159330120	160330120	1	0
	36	rs34687326	1	159830120	OR10J1	159439722	159440810	0	0	0	0	0	159330120	160330120	0	0
	36	rs34687326	1	159830120	OR10J5	159535003	159536052	0	0	0	0	0	159330120	160330120	0	0
	36	rs34687326	1	159830120	APCS	159587825	159588865	0	0	0	0	0	159330120	160330120	0	0
	36	rs34687326	1	159830120	CRP	159712289	159714589	0	0	0	0	0	159330120	160330120	0	0
	36	rs34687326	1	159830120	DUSP23	159780932	159782543	0	0	0	0	0	159330120	160330120	0	0
	36	rs34687326	1	159830120	FCRL6	159800511	159816251	0	0	0	0	0	159330120	160330120	0	0
	36	rs34687326	1	159830120	SNHG28	159834474	159855347	0	0	0	0	0	159330120	160330120	0	0
	36	rs34687326	1	159830120	VSIG8	159854316	159862657	0	0	0	0	0	159330120	160330120	0	0
	36	rs34687326	1	159830120	CFAP45	159872364	159900163	0	0	0	0	0	159330120	160330120	0	0
	36	rs34687326	1	159830120	TAGLN2	159918107	159925732	0	0	0	0	0	159330120	160330120	0	0
	36	rs34687326	1	159830120	IGSF9	159927039	159945596	0	0	0	0	0	159330120	160330120	0	0
	36	rs34687326	1	159830120	SLAMF9	159951492	159954254	0	0	0	0	0	159330120	160330120	0	0
	36	rs34687326	1	159830120	PIGM	160027672	160031993	0	0	0	0	0	159330120	160330120	0	0
	36	rs34687326	1	159830120	KCNJ10	160037467	160070248	0	0	0	0	0	159330120	160330120	0	0
	36	rs34687326	1	159830120	KCNJ9	160081570	160090563	0	0	0	0	0	159330120	160330120	0	0
	36	rs34687326	1	159830120	IGSF8	160091340	160098943	0	0	0	0	0	159330120	160330120	0	0
	36	rs34687326	1	159830120	ATP1A2	160115759	160143591	0	0	0	0	0	159330120	160330120	0	0
	36	rs34687326	1	159830120	ATP1A4	160151570	160186977	0	0	0	0	0	159330120	160330120	0	0
	36	rs34687326	1	159830120	CASQ1	160190495	160201886	0	0	0	0	0	159330120	160330120	0	0
	36	rs34687326	1	159830120	PEA15	160205337	160215376	0	0	0	0	0	159330120	160330120	0	0
	36	rs34687326	1	159830120	DCAF8	160215715	160285130	0	0	0	0	0	159330120	160330120	0	0
	36	rs34687326	1	159830120	ENSG00000258465	160217464	160285130	0	0	0	0	0	159330120	160330120	0	0
	36	rs34687326	1	159830120	PEX19	160276812	160286348	0	0	0	0	0	159330120	160330120	0	0
	36	rs34687326	1	159830120	COPA	160289273	160343400	0	0	0	0	0	159330120	160330120	0	0
	37	rs1801274	1	161509955	FCGR2A	161505430	161524013	1	1	1	1	4	161009955	162009955	1	0
	37	rs1801274	1	161509955	F11R	160995211	161021348	0	0	0	0	0	161009955	162009955	0	0
	37	rs1801274	1	161509955	TSTD1	161037631	161038990	0	0	0	0	0	161009955	162009955	0	0
	37	rs1801274	1	161509955	USF1	161039251	161045977	0	0	0	0	0	161009955	162009955	0	0
	37	rs1801274	1	161509955	ARHGAP30	161046946	161069970	0	0	0	0	0	161009955	162009955	0	0
	37	rs1801274	1	161509955	NECTIN4	161070995	161089599	0	0	0	0	0	161009955	162009955	0	0
	37	rs1801274	1	161509955	KLHDC9	161098361	161100346	0	0	0	0	0	161009955	162009955	0	0
	37	rs1801274	1	161509955	PFDN2	161100556	161118111	0	0	0	0	0	161009955	162009955	0	0
	37	rs1801274	1	161509955	NIT1	161118086	161125445	0	0	0	0	0	161009955	162009955	0	0
	37	rs1801274	1	161509955	DEDD	161120974	161132688	0	0	0	0	0	161009955	162009955	0	0
	37	rs1801274	1	161509955	UFC1	161152776	161158856	0	0	0	0	0	161009955	162009955	0	0
	37	rs1801274	1	161509955	USP21	161159450	161165723	0	0	0	0	0	161009955	162009955	0	0
	37	rs1801274	1	161509955	PPOX	161166410	161178013	0	0	0	0	0	161009955	162009955	0	0
	37	rs1801274	1	161509955	B4GALT3	161171310	161177497	0	0	0	0	0	161009955	162009955	0	0
	37	rs1801274	1	161509955	ADAMTS4	161184308	161199056	0	0	0	0	0	161009955	162009955	0	0
	37	rs1801274	1	161509955	NDUFS2	161197104	161214395	0	0	0	0	0	161009955	162009955	0	0
	37	rs1801274	1	161509955	FCER1G	161215234	161220699	0	0	0	0	0	161009955	162009955	0	0
	37	rs1801274	1	161509955	APOA2	161222292	161223631	0	0	0	0	0	161009955	162009955	0	0
	37	rs1801274	1	161509955	TOMM40L	161226003	161230618	0	0	1	0	1	161009955	162009955	0	0
	37	rs1801274	1	161509955	NR1I3	161229666	161238302	0	0	0	0	0	161009955	162009955	0	0
	37	rs1801274	1	161509955	PCP4L1	161258727	161285450	0	0	0	0	0	161009955	162009955	0	0
	37	rs1801274	1	161509955	MPZ	161304735	161309972	0	0	0	0	0	161009955	162009955	0	0
	37	rs1801274	1	161509955	SDHC	161314257	161363194	0	0	0	0	0	161009955	162009955	0	0
	37	rs1801274	1	161509955	CFAP126	161364731	161367874	0	0	0	0	0	161009955	162009955	0	0
	37	rs1801274	1	161509955	HSPA6	161524246	161526891	0	0	1	0	1	161009955	162009955	0	0
	37	rs1801274	1	161509955	FCGR3A	161541759	161631127	0	0	0	0	0	161009955	162009955	0	0
	37	rs1801274	1	161509955	FCGR2B	161581311	161678654	0	0	0	0	0	161009955	162009955	0	0
	37	rs1801274	1	161509955	FCGR3B	161623196	161631963	0	0	0	0	0	161009955	162009955	0	0
	37	rs1801274	1	161509955	FCRLA	161706972	161714352	0	0	0	0	0	161009955	162009955	0	0
	37	rs1801274	1	161509955	FCRLB	161721563	161728143	0	0	0	0	0	161009955	162009955	0	0
	37	rs1801274	1	161509955	DUSP12	161749758	161757238	0	0	0	0	0	161009955	162009955	0	0
	37	rs1801274	1	161509955	ATF6	161766294	161964070	0	0	0	0	0	161009955	162009955	0	0
	37	rs1801274	1	161509955	OLFML2B	161983192	162023854	0	0	0	0	0	161009955	162009955	0	0
	38	rs61810412	1	162651183	HSD17B7	162790702	162812817	0	1	1	0	2	162151183	163151183	1	0
	38	rs61810412	1	162651183	NOS1AP	162069774	162383531	0	0	0	0	0	162151183	163151183	0	0
	38	rs61810412	1	162651183	C1orf226	162366908	162386810	0	0	0	0	0	162151183	163151183	0	0
	38	rs61810412	1	162651183	SPATA46	162373203	162376870	0	0	0	0	0	162151183	163151183	0	0
	38	rs61810412	1	162651183	SH2D1B	162395266	162412138	0	0	0	0	0	162151183	163151183	0	0
	38	rs61810412	1	162651183	UHMK1	162497251	162529629	0	0	0	0	0	162151183	163151183	0	0
	38	rs61810412	1	162651183	UAP1	162561533	162599837	0	0	0	0	0	162151183	163151183	0	0
	38	rs61810412	1	162651183	DDR2	162631373	162787400	1	0	0	0	1	162151183	163151183	0	0
	38	rs61810412	1	162651183	CCDC190	162824458	162868815	0	0	0	0	0	162151183	163151183	0	0
	38	rs61810412	1	162651183	RGS4	163068775	163076802	0	0	0	0	0	162151183	163151183	0	0
	38	rs61810412	1	162651183	RGS5	163111121	163321787	0	0	0	0	0	162151183	163151183	0	0
	39	rs4656402	1	163629505	RGS5	163111121	163321787	1	1	0	0	2	163129505	164129505	1	0
	39	rs4656402	1	163629505	NUF2	163266576	163355764	0	0	0	0	0	163129505	164129505	0	0
	40	rs2056626	1	167451188	CD247	167430640	167518610	1	1	0	0	2	166951188	167951188	1	0
	40	rs2056626	1	167451188	ILDR2	166913206	166975482	0	0	0	0	0	166951188	167951188	0	0
	40	rs2056626	1	167451188	MAEL	166989109	167022214	0	0	0	0	0	166951188	167951188	0	0
	40	rs2056626	1	167451188	GPA33	167052836	167090631	0	0	0	0	0	166951188	167951188	0	0
	40	rs2056626	1	167451188	STYXL2	167094045	167129165	0	0	0	0	0	166951188	167951188	0	0
	40	rs2056626	1	167451188	POU2F1	167220829	167427345	0	0	0	0	0	166951188	167951188	0	0
	40	rs2056626	1	167451188	CREG1	167529677	167553767	0	0	0	0	0	166951188	167951188	0	0
	40	rs2056626	1	167451188	RCSD1	167630093	167706249	0	0	0	0	0	166951188	167951188	0	0
	40	rs2056626	1	167451188	MPZL1	167721192	167791919	0	0	0	0	0	166951188	167951188	0	0
	40	rs2056626	1	167451188	ADCY10	167812401	167914215	0	0	0	0	0	166951188	167951188	0	0
	40	rs2056626	1	167451188	MPC2	167916729	167937040	0	0	0	0	0	166951188	167951188	0	0
	40	rs2056626	1	167451188	DCAF6	167935783	168075843	0	0	0	0	0	166951188	167951188	0	0
	41	rs114687274	1	168840198	XCL2	168540765	168543997	0	0	0	0	0	168340198	169340198	0	0
	41	rs114687274	1	168840198	XCL1	168576473	168582077	0	0	0	0	0	168340198	169340198	0	0
	41	rs114687274	1	168840198	DPT	168695459	168729264	0	0	0	0	0	168340198	169340198	0	0
	41	rs114687274	1	168840198	ATP1B1	169105697	169132722	0	0	0	0	0	168340198	169340198	0	0
	41	rs114687274	1	168840198	NME7	169132531	169367967	0	0	0	0	0	168340198	169340198	0	0
	42	rs7543304	1	169681606	SELP	169588849	169630193	0	1	1	0	2	169181606	170181606	1	0
	42	rs7543304	1	169681606	NME7	169132531	169367967	0	0	0	0	0	169181606	170181606	0	0
	42	rs7543304	1	169681606	BLZF1	169367970	169396540	0	0	1	0	1	169181606	170181606	0	0
	42	rs7543304	1	169681606	CCDC181	169394870	169460669	0	0	0	0	0	169181606	170181606	0	0
	42	rs7543304	1	169681606	SLC19A2	169463909	169486003	0	0	0	0	0	169181606	170181606	0	0
	42	rs7543304	1	169681606	F5	169514166	169586588	0	0	0	0	0	169181606	170181606	0	0
	42	rs7543304	1	169681606	FIRRM	169671567	169854080	1	0	1	0	2	169181606	170181606	0	0
	42	rs7543304	1	169681606	SELL	169690667	169711698	0	0	0	0	0	169181606	170181606	0	0
	42	rs7543304	1	169681606	SELE	169722640	169764705	0	0	0	0	0	169181606	170181606	0	0
	42	rs7543304	1	169681606	METTL18	169792529	169794966	0	0	0	0	0	169181606	170181606	0	0
	42	rs7543304	1	169681606	SCYL3	169849631	169894267	0	0	1	0	1	169181606	170181606	0	0
	42	rs7543304	1	169681606	KIFAP3	169921326	170085208	0	0	1	0	1	169181606	170181606	0	0
	42	rs7543304	1	169681606	NTMT2	170146001	170167790	0	0	0	0	0	169181606	170181606	0	0
	43	rs1576975	1	170432945	GORAB	170532129	170553446	1	1	0	0	2	169932945	170932945	1	0
	43	rs1576975	1	170432945	KIFAP3	169921326	170085208	0	0	1	0	1	169932945	170932945	0	0
	43	rs1576975	1	170432945	NTMT2	170146001	170167790	0	0	0	0	0	169932945	170932945	0	0
	43	rs1576975	1	170432945	PRRX1	170662728	170739419	0	0	1	0	1	169932945	170932945	0	0
	44	rs7528321	1	173362623	PRDX6	173477266	173488807	1	1	0	0	2	172862623	173862623	1	0
	44	rs7528321	1	173362623	TNFSF18	173039960	173050963	0	0	0	0	0	172862623	173862623	0	0
	44	rs7528321	1	173362623	TNFSF4	173183734	173207313	0	0	0	0	0	172862623	173862623	0	0
	44	rs7528321	1	173362623	SLC9C2	173500464	173603094	0	0	0	0	0	172862623	173862623	0	0
	44	rs7528321	1	173362623	ANKRD45	173609561	173669862	0	0	0	0	0	172862623	173862623	0	0
	44	rs7528321	1	173362623	KLHL20	173714941	173779954	0	0	0	0	0	172862623	173862623	0	0
	44	rs7528321	1	173362623	CENPL	173799550	173824720	0	0	0	0	0	172862623	173862623	0	0
	44	rs7528321	1	173362623	DARS2	173824503	173858546	0	0	0	0	0	172862623	173862623	0	0
	45	rs1609829	1	180939925	KIAA1614	180913154	180951614	1	1	1	1	4	180439925	181439925	1	0
	45	rs1609829	1	180939925	XPR1	180632004	180890251	0	0	0	0	0	180439925	181439925	0	0
	45	rs1609829	1	180939925	STX6	180972725	181022911	0	0	0	0	0	180439925	181439925	0	0
	45	rs1609829	1	180939925	MR1	181033931	181061938	0	0	0	0	0	180439925	181439925	0	0
	45	rs1609829	1	180939925	IER5	181088502	181090841	0	0	0	0	0	180439925	181439925	0	0
	45	rs1609829	1	180939925	CACNA1E	181413102	181806942	0	0	0	0	0	180439925	181439925	0	0
	46	rs988905	1	186763997	PLA2G4A	186828953	186988981	1	1	0	0	2	186263997	187263997	1	0
	46	rs988905	1	186763997	PRG4	186296273	186314562	0	0	0	0	0	186263997	187263997	0	0
	46	rs988905	1	186763997	TPR	186311652	186375693	0	0	0	0	0	186263997	187263997	0	0
	46	rs988905	1	186763997	ODR4	186375758	186421378	0	0	1	0	1	186263997	187263997	0	0
	46	rs988905	1	186763997	PDC	186443566	186461122	0	0	1	0	1	186263997	187263997	0	0
	46	rs988905	1	186763997	PTGS2	186671791	186680427	0	0	0	0	0	186263997	187263997	0	0
	47	rs16825915	1	186793684	PRG4	186296273	186314562	0	0	0	0	0	186293684	187293684	0	0
	47	rs16825915	1	186793684	TPR	186311652	186375693	0	0	0	0	0	186293684	187293684	0	0
	47	rs16825915	1	186793684	ODR4	186375758	186421378	0	0	0	0	0	186293684	187293684	0	0
	47	rs16825915	1	186793684	PDC	186443566	186461122	0	0	0	0	0	186293684	187293684	0	0
	47	rs16825915	1	186793684	PTGS2	186671791	186680427	0	1	0	0	1	186293684	187293684	0	0
	47	rs16825915	1	186793684	PLA2G4A	186828953	186988981	1	0	0	0	1	186293684	187293684	0	0
	48	rs17641524	1	197735587	DENND1B	197504748	197775696	1	1	1	1	4	197235587	198235587	1	0
	48	rs17641524	1	197735587	CRB1	197201462	197478455	0	0	0	0	0	197235587	198235587	0	0
	48	rs17641524	1	197735587	C1orf53	197902647	197907367	0	0	0	0	0	197235587	198235587	0	0
	48	rs17641524	1	197735587	LHX9	197911907	197935478	0	0	0	0	0	197235587	198235587	0	0
	48	rs17641524	1	197735587	NEK7	198156963	198322420	0	0	0	0	0	197235587	198235587	0	0
	49	rs7554511	1	200908434	INAVA	200891048	200915735	1	1	1	0	3	200408434	201408434	1	0
	49	rs7554511	1	200908434	ZNF281	200404940	200410056	0	0	0	0	0	200408434	201408434	0	0
	49	rs7554511	1	200908434	KIF14	200551500	200620734	0	0	1	0	1	200408434	201408434	0	0
	49	rs7554511	1	200908434	DDX59	200623896	200669969	0	0	1	0	1	200408434	201408434	0	0
	49	rs7554511	1	200908434	CAMSAP2	200739558	200860704	0	0	1	0	1	200408434	201408434	0	0
	49	rs7554511	1	200908434	GPR25	200872955	200874178	0	0	1	0	1	200408434	201408434	0	0
	49	rs7554511	1	200908434	KIF21B	200969392	201023700	0	0	1	0	1	200408434	201408434	0	0
	49	rs7554511	1	200908434	CACNA1S	201039514	201112566	0	0	0	0	0	200408434	201408434	0	0
	49	rs7554511	1	200908434	ASCL5	201113953	201127184	0	0	0	0	0	200408434	201408434	0	0
	49	rs7554511	1	200908434	TMEM9	201134772	201171574	0	0	0	0	0	200408434	201408434	0	0
	49	rs7554511	1	200908434	IGFN1	201190825	201228952	0	0	0	0	0	200408434	201408434	0	0
	49	rs7554511	1	200908434	PKP1	201283452	201332993	0	0	0	0	0	200408434	201408434	0	0
	49	rs7554511	1	200908434	TNNT2	201359008	201377762	0	0	0	0	0	200408434	201408434	0	0
	49	rs7554511	1	200908434	LAD1	201373244	201399608	0	0	0	0	0	200408434	201408434	0	0
	49	rs7554511	1	200908434	TNNI1	201404497	201429866	0	0	0	0	0	200408434	201408434	0	0
	50	rs35383942	1	201468704	PHLDA3	201465492	201469237	1	1	1	1	4	200968704	201968704	1	0
	50	rs35383942	1	201468704	KIF21B	200969392	201023700	0	0	0	0	0	200968704	201968704	0	0
	50	rs35383942	1	201468704	CACNA1S	201039514	201112566	0	0	0	0	0	200968704	201968704	0	0
	50	rs35383942	1	201468704	ASCL5	201113953	201127184	0	0	0	0	0	200968704	201968704	0	0
	50	rs35383942	1	201468704	TMEM9	201134772	201171574	0	0	0	0	0	200968704	201968704	0	0
	50	rs35383942	1	201468704	IGFN1	201190825	201228952	0	0	0	0	0	200968704	201968704	0	0
	50	rs35383942	1	201468704	PKP1	201283452	201332993	0	0	0	0	0	200968704	201968704	0	0
	50	rs35383942	1	201468704	TNNT2	201359008	201377762	0	0	0	0	0	200968704	201968704	0	0
	50	rs35383942	1	201468704	LAD1	201373244	201399608	0	0	0	0	0	200968704	201968704	0	0
	50	rs35383942	1	201468704	TNNI1	201404497	201429866	0	0	0	0	0	200968704	201968704	0	0
	50	rs35383942	1	201468704	CSRP1	201483530	201509456	0	0	0	0	0	200968704	201968704	0	0
	50	rs35383942	1	201468704	NAV1	201623283	201826974	0	0	0	0	0	200968704	201968704	0	0
	50	rs35383942	1	201468704	IPO9	201829141	201884294	0	0	0	0	0	200968704	201968704	0	0
	50	rs35383942	1	201468704	SHISA4	201888680	201892306	0	0	0	0	0	200968704	201968704	0	0
	50	rs35383942	1	201468704	LMOD1	201896452	201946587	0	0	0	0	0	200968704	201968704	0	0
	50	rs35383942	1	201468704	TIMM17A	201955491	201970661	0	0	0	0	0	200968704	201968704	0	0
	51	rs1772159	1	205790067	NUAK2	205302059	205321755	0	0	0	0	0	205290067	206290067	0	0
	51	rs1772159	1	205790067	KLHDC8A	205336092	205357090	0	0	0	0	0	205290067	206290067	0	0
	51	rs1772159	1	205790067	LEMD1	205381378	205455954	0	0	0	0	0	205290067	206290067	0	0
	51	rs1772159	1	205790067	CDK18	205504595	205532793	0	0	0	0	0	205290067	206290067	0	0
	51	rs1772159	1	205790067	MFSD4A	205568885	205602918	0	0	0	0	0	205290067	206290067	0	0
	51	rs1772159	1	205790067	ELK4	205607943	205631962	0	0	0	0	0	205290067	206290067	0	0
	51	rs1772159	1	205790067	SLC45A3	205657851	205680459	0	0	1	0	1	205290067	206290067	0	0
	51	rs1772159	1	205790067	NUCKS1	205712819	205750276	0	0	1	0	1	205290067	206290067	0	0
	51	rs1772159	1	205790067	RAB29	205767986	205775460	1	0	0	0	1	205290067	206290067	0	0
	51	rs1772159	1	205790067	SLC41A1	205789093	205813748	0	1	0	0	1	205290067	206290067	0	0
	51	rs1772159	1	205790067	PM20D1	205828022	205850132	0	0	0	0	0	205290067	206290067	0	0
	51	rs1772159	1	205790067	SLC26A9	205913048	205943460	0	0	0	0	0	205290067	206290067	0	0
	51	rs1772159	1	205790067	FAM72A	206186179	206204414	0	0	0	0	0	205290067	206290067	0	0
	51	rs1772159	1	205790067	AVPR1B	206109692	206117355	0	0	0	0	0	205290067	206290067	0	0
	51	rs1772159	1	205790067	CTSE	206009264	206023909	0	0	0	0	0	205290067	206290067	0	0
	52	rs2297539	1	206430185	SLC26A9	205913048	205943460	0	0	0	0	0	205930185	206930185	0	0
	52	rs2297539	1	206430185	FAM72A	206186179	206204414	0	0	0	0	0	205930185	206930185	0	0
	52	rs2297539	1	206430185	AVPR1B	206109692	206117355	0	0	0	0	0	205930185	206930185	0	0
	52	rs2297539	1	206430185	CTSE	206009264	206023909	0	0	0	0	0	205930185	206930185	0	0
	52	rs2297539	1	206430185	IKBKE-AS1	206491116	206497728	0	0	0	0	0	205930185	206930185	0	0
	52	rs2297539	1	206430185	EIF2D	206578234	206586265	0	0	0	0	0	205930185	206930185	0	0
	52	rs2297539	1	206430185	DYRK3	206635536	206684419	0	0	0	0	0	205930185	206930185	0	0
	52	rs2297539	1	206430185	MAPKAPK2	206684944	206734283	0	0	0	0	0	205930185	206930185	0	0
	52	rs2297539	1	206430185	IL10	206767602	206772494	0	0	0	0	0	205930185	206930185	0	0
	52	rs2297539	1	206430185	IL19	206798870	206842979	0	0	0	0	0	205930185	206930185	0	0
	52	rs2297539	1	206430185	IL20	206865354	206869223	0	0	0	0	0	205930185	206930185	0	0
	52	rs2297539	1	206430185	IL24	206897443	206904139	0	0	0	0	0	205930185	206930185	0	0
	52	rs2297539	1	206430185	FCMR	206904386	206923247	0	0	0	0	0	205930185	206930185	0	0
	52	rs2297539	1	206430185	PIGR	206928518	206946466	0	0	0	0	0	205930185	206930185	0	0
	53	rs3024505	1	206766559	IL19	206798870	206842979	1	1	0	0	2	206266559	207266559	1	0
	53	rs3024505	1	206766559	IKBKE-AS1	206491116	206497728	0	0	0	0	0	206266559	207266559	0	0
	53	rs3024505	1	206766559	EIF2D	206578234	206586265	0	0	0	0	0	206266559	207266559	0	0
	53	rs3024505	1	206766559	DYRK3	206635536	206684419	0	0	1	0	1	206266559	207266559	0	0
	53	rs3024505	1	206766559	MAPKAPK2	206684944	206734283	0	0	0	0	0	206266559	207266559	0	0
	53	rs3024505	1	206766559	IL10	206767602	206772494	0	0	0	0	0	206266559	207266559	0	0
	53	rs3024505	1	206766559	IL20	206865354	206869223	0	0	0	0	0	206266559	207266559	0	0
	53	rs3024505	1	206766559	IL24	206897443	206904139	0	0	1	0	1	206266559	207266559	0	0
	53	rs3024505	1	206766559	FCMR	206904386	206923247	0	0	0	0	0	206266559	207266559	0	0
	53	rs3024505	1	206766559	PIGR	206928518	206946466	0	0	0	0	0	206266559	207266559	0	0
	53	rs3024505	1	206766559	FCAMR	206957965	206970625	0	0	0	0	0	206266559	207266559	0	0
	53	rs3024505	1	206766559	C1orf116	207018521	207032756	0	0	0	0	0	206266559	207266559	0	0
	53	rs3024505	1	206766559	YOD1	207043849	207052980	0	0	0	0	0	206266559	207266559	0	0
	53	rs3024505	1	206766559	PFKFB2	207049456	207081024	0	0	0	0	0	206266559	207266559	0	0
	53	rs3024505	1	206766559	C4BPB	207088842	207099993	0	0	0	0	0	206266559	207266559	0	0
	53	rs3024505	1	206766559	C4BPA	207104262	207144972	0	0	0	0	0	206266559	207266559	0	0
	54	rs7555143	1	213654720	PROX1	213983181	214041252	1	1	0	0	2	213154720	214154720	1	0
	54	rs7555143	1	213654720	RPS6KC1	213121902	213274773	0	0	0	0	0	213154720	214154720	0	0
	55	rs4655345	1	214435361	PTPN14	214348696	214552449	1	1	0	0	2	213935361	214935361	1	0
	55	rs4655345	1	214435361	PROX1	213983181	214041252	0	0	0	0	0	213935361	214935361	0	0
	55	rs4655345	1	214435361	SMYD2	214281102	214337131	0	0	0	0	0	213935361	214935361	0	0
	55	rs4655345	1	214435361	CENPF	214603195	214664588	0	0	0	0	0	213935361	214935361	0	0
	56	rs759359281	1	219927155	SLC30A10	219685427	219958647	0	0	0	0	0	219427155	220427155	0	0
	56	rs759359281	1	219927155	EPRS1	219968601	220046658	0	0	0	0	0	219427155	220427155	0	0
	56	rs759359281	1	219927155	BPNT1	220057482	220090462	0	0	0	0	0	219427155	220427155	0	0
	56	rs759359281	1	219927155	IARS2	220094102	220148038	0	0	0	0	0	219427155	220427155	0	0
	56	rs759359281	1	219927155	RAB3GAP2	220148293	220272454	0	0	0	0	0	219427155	220427155	0	0
	56	rs12046182	1	220800832	MTARC1	220786759	220814393	1	1	0	0	2	219427155	220427155	1	0
	56	rs12046182	1	220800832	MARK1	220528226	220664461	0	0	0	0	0	219427155	220427155	0	0
	56	rs12046182	1	220800832	C1orf115	220689845	220699157	0	0	0	0	0	219427155	220427155	0	0
	56	rs12046182	1	220800832	MTARC2	220748225	220784808	0	0	0	0	0	219427155	220427155	0	0
	56	rs12046182	1	220800832	HLX	220878357	220885059	0	0	0	0	0	219427155	220427155	0	0
	57	rs2642438	1	220796686	MTARC1	220786759	220814393	1	1	1	1	4	220296686	221296686	1	0
	57	rs2642438	1	220796686	MARK1	220528226	220664461	0	0	0	0	0	220296686	221296686	0	0
	57	rs2642438	1	220796686	C1orf115	220689845	220699157	0	0	1	0	1	220296686	221296686	0	0
	57	rs2642438	1	220796686	MTARC2	220748225	220784808	0	0	1	0	1	220296686	221296686	0	0
	57	rs2642438	1	220796686	HLX	220878357	220885059	0	0	1	0	1	220296686	221296686	0	0
	58	rs10863683	1	222077747	DUSP10	221701424	221742176	1	1	0	0	2	221577747	222577747	1	1
	58	rs10863683	1	222077747	HHIPL2	222522260	222548103	0	0	0	0	0	221577747	222577747	0	1
	58	rs10863683	1	222077747	TAF1A	222557902	222589933	0	0	0	0	0	221577747	222577747	0	1
	59	rs7549980	1	222095156	DUSP10	221701424	221742176	1	1	0	0	2	221595156	222595156	1	0
	59	rs7549980	1	222095156	HHIPL2	222522260	222548103	0	0	0	0	0	221595156	222595156	0	0
	59	rs7549980	1	222095156	TAF1A	222557902	222589933	0	0	0	0	0	221595156	222595156	0	0
	60	rs835672	1	226754854	ITPKB	226631690	226739323	1	1	0	0	2	226254854	227254854	1	0
	60	rs835672	1	226754854	LIN9	226231149	226309869	0	0	0	0	0	226254854	227254854	0	0
	60	rs835672	1	226754854	PARP1	226360691	226408079	0	0	0	0	0	226254854	227254854	0	0
	60	rs835672	1	226754854	STUM	226548800	226609214	0	0	0	0	0	226254854	227254854	0	0
	60	rs835672	1	226754854	PSEN2	226870184	226896105	0	0	1	0	1	226254854	227254854	0	0
	60	rs835672	1	226754854	COQ8A	226897536	226987545	0	0	1	0	1	226254854	227254854	0	0
	60	rs835672	1	226754854	CDC42BPA	226989865	227318474	0	0	0	0	0	226254854	227254854	0	0
	61	rs10916207	1	227780237	SNAP47	227728539	227781226	0	1	1	0	2	227280237	228280237	1	0
	61	rs10916207	1	227780237	CDC42BPA	226989865	227318474	0	0	1	0	1	227280237	228280237	0	0
	61	rs10916207	1	227780237	ZNF678	227563543	227677443	0	0	1	0	1	227280237	228280237	0	0
	61	rs10916207	1	227780237	JMJD4	227730425	227735411	0	0	1	0	1	227280237	228280237	0	0
	61	rs10916207	1	227780237	PRSS38	227815693	227846470	1	0	0	0	1	227280237	228280237	0	0
	61	rs10916207	1	227780237	WNT9A	227918656	227947898	0	0	0	0	0	227280237	228280237	0	0
	61	rs10916207	1	227780237	WNT3A	228007051	228061260	0	0	0	0	0	227280237	228280237	0	0
	61	rs10916207	1	227780237	ARF1	228082660	228099211	0	0	0	0	0	227280237	228280237	0	0
	61	rs10916207	1	227780237	C1orf35	228100726	228105411	0	0	0	0	0	227280237	228280237	0	0
	61	rs10916207	1	227780237	MRPL55	228106679	228109312	0	0	0	0	0	227280237	228280237	0	0
	61	rs10916207	1	227780237	GUK1	228139962	228148984	0	0	0	0	0	227280237	228280237	0	0
	61	rs10916207	1	227780237	GJC2	228149852	228159826	0	0	0	0	0	227280237	228280237	0	0
	61	rs10916207	1	227780237	IBA57	228165815	228182257	0	0	0	0	0	227280237	228280237	0	0
	61	rs10916207	1	227780237	OBSCN-AS1	228203506	228213664	0	0	0	0	0	227280237	228280237	0	0
	61	rs10916207	1	227780237	OBSCN	228208130	228378876	0	0	0	0	0	227280237	228280237	0	0
	62	rs10910476	1	234599210	SLC35F3	233904933	234324516	0	0	0	0	0	234099210	235099210	0	1
	62	rs10910476	1	234599210	COA6	234373456	234384049	0	0	0	0	0	234099210	235099210	0	1
	62	rs10910476	1	234599210	TARBP1	234391313	234479103	0	1	0	0	1	234099210	235099210	0	1
	62	rs10910476	1	234599210	IRF2BP2	234604269	234609525	1	0	0	0	1	234099210	235099210	0	1
	63	rs2783968	1	243336442	SDCCAG8	243256018	243500092	1	1	1	0	3	242836442	243836442	1	0
	63	rs2783968	1	243336442	CEP170	243124428	243255348	0	0	1	0	1	242836442	243836442	0	0
	63	rs2783968	1	243336442	AKT3	243488233	243851079	0	0	0	0	0	242836442	243836442	0	0
	64	rs7570993	2	652565	SH3YL1	217730	266398	0	1	0	0	1	152565	1152565	0	0
	64	rs7570993	2	652565	ACP1	264140	278283	0	0	0	0	0	152565	1152565	0	0
	64	rs7570993	2	652565	ALKAL2	279558	288851	0	0	1	0	1	152565	1152565	0	0
	64	rs7570993	2	652565	TMEM18	667335	677439	1	0	0	0	1	152565	1152565	0	0
	64	rs7570993	2	652565	SNTG2	950868	1221443	0	0	0	0	0	152565	1152565	0	0
	65	rs17605696	2	11899552	LPIN1	11677595	11827409	1	1	0	0	2	11399552	12399552	1	0
	65	rs17605696	2	11899552	E2F6	11444375	11466171	0	0	0	0	0	11399552	12399552	0	0
	65	rs17605696	2	11899552	GREB1	11534116	11642788	0	0	0	0	0	11399552	12399552	0	0
	65	rs17605696	2	11899552	NTSR2	11658178	11670164	0	0	0	0	0	11399552	12399552	0	0
	66	rs807624	2	15642347	DDX1	15591178	15631111	1	1	1	0	3	15142347	16142347	1	0
	66	rs807624	2	15642347	NBAS	15166908	15561330	0	0	0	0	0	15142347	16142347	0	0
	66	rs807624	2	15642347	MYCN	15940564	15947007	0	0	0	0	0	15142347	16142347	0	0
	67	rs7578575	2	25265950	DNMT3A	25232976	25342590	1	1	0	0	2	24765950	25765950	1	0
	67	rs7578575	2	25265950	NCOA1	24491914	24770702	0	0	1	0	1	24765950	25765950	0	0
	67	rs7578575	2	25265950	PTRHD1	24789734	24793382	0	0	1	0	1	24765950	25765950	0	0
	67	rs7578575	2	25265950	CENPO	24793136	24822376	0	0	1	0	1	24765950	25765950	0	0
	67	rs7578575	2	25265950	ADCY3	24819169	24919839	0	0	1	0	1	24765950	25765950	0	0
	67	rs7578575	2	25265950	DNAJC27	24943636	24972094	0	0	1	0	1	24765950	25765950	0	0
	67	rs7578575	2	25265950	EFR3B	25042130	25155374	0	0	0	0	0	24765950	25765950	0	0
	67	rs7578575	2	25265950	POMC	25160853	25168903	0	0	1	0	1	24765950	25765950	0	0
	67	rs7578575	2	25265950	DTNB	25377198	25673634	0	0	0	0	0	24765950	25765950	0	0
	67	rs7578575	2	25265950	ASXL2	25733753	25878516	0	0	0	0	0	24765950	25765950	0	0
	68	rs11127048	2	27529596	SPATA31H1	27576522	27582721	1	0	1	0	2	27029596	28029596	1	1
	68	rs11127048	2	27529596	TMEM214	27032910	27041695	0	0	0	0	0	27029596	28029596	0	1
	68	rs11127048	2	27529596	AGBL5	27042364	27070622	0	0	0	0	0	27029596	28029596	0	1
	68	rs11127048	2	27529596	OST4	27070472	27071773	0	0	0	0	0	27029596	28029596	0	1
	68	rs11127048	2	27529596	EMILIN1	27078567	27086403	0	0	0	0	0	27029596	28029596	0	1
	68	rs11127048	2	27529596	KHK	27086747	27100772	0	0	0	0	0	27029596	28029596	0	1
	68	rs11127048	2	27529596	CGREF1	27098889	27119127	0	0	0	0	0	27029596	28029596	0	1
	68	rs11127048	2	27529596	ABHD1	27123814	27130812	0	0	0	0	0	27029596	28029596	0	1
	68	rs11127048	2	27529596	PREB	27130756	27134675	0	0	0	0	0	27029596	28029596	0	1
	68	rs11127048	2	27529596	PRR30	27136855	27139410	0	0	0	0	0	27029596	28029596	0	1
	68	rs11127048	2	27529596	TCF23	27149004	27153510	0	0	0	0	0	27029596	28029596	0	1
	68	rs11127048	2	27529596	SLC5A6	27199587	27212958	0	0	0	0	0	27029596	28029596	0	1
	68	rs11127048	2	27529596	ATRAID	27212027	27217178	0	0	1	0	1	27029596	28029596	0	1
	68	rs11127048	2	27529596	CAD	27217390	27243943	0	0	0	0	0	27029596	28029596	0	1
	68	rs11127048	2	27529596	SLC30A3	27253684	27275817	0	0	0	0	0	27029596	28029596	0	1
	68	rs11127048	2	27529596	DNAJC5G	27275421	27281499	0	0	0	0	0	27029596	28029596	0	1
	68	rs11127048	2	27529596	TRIM54	27282392	27307439	0	0	0	0	0	27029596	28029596	0	1
	68	rs11127048	2	27529596	UCN	27307400	27308445	0	0	0	0	0	27029596	28029596	0	1
	68	rs11127048	2	27529596	MPV17	27312445	27325680	0	0	0	0	0	27029596	28029596	0	1
	68	rs11127048	2	27529596	GTF3C2	27325849	27357001	0	0	0	0	0	27029596	28029596	0	1
	68	rs11127048	2	27529596	EIF2B4	27364352	27370486	0	0	0	0	0	27029596	28029596	0	1
	68	rs11127048	2	27529596	SNX17	27370522	27377128	0	0	1	0	1	27029596	28029596	0	1
	68	rs11127048	2	27529596	ZNF513	27377231	27380790	0	0	0	0	0	27029596	28029596	0	1
	68	rs11127048	2	27529596	PPM1G	27381194	27409687	0	0	1	0	1	27029596	28029596	0	1
	68	rs11127048	2	27529596	NRBP1	27427790	27442259	0	0	1	0	1	27029596	28029596	0	1
	68	rs11127048	2	27529596	KRTCAP3	27442366	27446481	0	0	1	0	1	27029596	28029596	0	1
	68	rs11127048	2	27529596	IFT172	27444371	27489789	0	0	0	0	0	27029596	28029596	0	1
	68	rs11127048	2	27529596	FNDC4	27491883	27495245	0	1	0	0	1	27029596	28029596	0	1
	68	rs11127048	2	27529596	GCKR	27496842	27523687	0	0	0	1	1	27029596	28029596	0	1
	68	rs11127048	2	27529596	ZNF512	27583030	27635174	0	0	1	0	1	27029596	28029596	0	1
	68	rs11127048	2	27529596	CCDC121	27625639	27629012	0	0	0	0	0	27029596	28029596	0	1
	68	rs11127048	2	27529596	GPN1	27628247	27651508	0	0	1	0	1	27029596	28029596	0	1
	68	rs11127048	2	27529596	SUPT7L	27650812	27663809	0	0	0	0	0	27029596	28029596	0	1
	68	rs11127048	2	27529596	SLC4A1AP	27663471	27694973	0	0	1	0	1	27029596	28029596	0	1
	68	rs11127048	2	27529596	MRPL33	27771717	27988087	0	0	0	0	0	27029596	28029596	0	1
	68	rs11127048	2	27529596	RBKS	27781364	27891098	0	0	1	0	1	27029596	28029596	0	1
	68	rs11127048	2	27529596	BABAM2	27889941	28338901	0	0	0	0	0	27029596	28029596	0	1
	69	rs6712705	2	28195164	MRPL33	27771717	27988087	0	0	1	0	1	27695164	28695164	0	0
	69	rs6712705	2	28195164	RBKS	27781364	27891098	0	0	1	0	1	27695164	28695164	0	0
	69	rs6712705	2	28195164	BABAM2	27889941	28338901	0	1	0	0	1	27695164	28695164	0	0
	69	rs6712705	2	28195164	FOSL2	28392448	28417312	1	0	0	0	1	27695164	28695164	0	0
	69	rs6712705	2	28195164	PLB1	28457145	28633051	0	0	0	0	0	27695164	28695164	0	0
	70	rs11127150	2	28404762	FOSL2	28392448	28417312	1	1	0	0	2	27904762	28904762	1	0
	70	rs11127150	2	28404762	MRPL33	27771717	27988087	0	0	0	0	0	27904762	28904762	0	0
	70	rs11127150	2	28404762	BABAM2	27889941	28338901	0	0	0	0	0	27904762	28904762	0	0
	70	rs11127150	2	28404762	PLB1	28457145	28633051	0	0	0	0	0	27904762	28904762	0	0
	70	rs11127150	2	28404762	PPP1CB	28751640	28802940	0	0	0	0	0	27904762	28904762	0	0
	70	rs11127150	2	28404762	SPDYA	28782517	28850611	0	0	0	0	0	27904762	28904762	0	0
	70	rs11127150	2	28404762	TRMT61B	28849821	28870301	0	0	0	0	0	27904762	28904762	0	0
	70	rs11127150	2	28404762	WDR43	28894643	28948222	0	0	0	0	0	27904762	28904762	0	0
	71	rs6712473	2	33188573	LTBP1	32946972	33399509	1	1	1	0	3	32688573	33688573	1	1
	71	rs6712473	2	33188573	TTC27	32628032	32821051	0	0	0	0	0	32688573	33688573	0	1
	71	rs6712473	2	33188573	RASGRP3	33436324	33564750	0	0	0	0	0	32688573	33688573	0	1
	71	rs6712473	2	33188573	FAM98A	33583658	33599382	0	0	0	0	0	32688573	33688573	0	1
	72	rs996102	2	33203281	LTBP1	32946972	33399509	0	1	1	0	2	32703281	33703281	1	0
	72	rs996102	2	33203281	TTC27	32628032	32821051	0	0	0	0	0	32703281	33703281	0	0
	72	rs996102	2	33203281	RASGRP3	33436324	33564750	1	0	0	0	1	32703281	33703281	0	0
	72	rs996102	2	33203281	FAM98A	33583658	33599382	0	0	0	0	0	32703281	33703281	0	0
	73	rs11124554	2	36922355	STRN	36843640	36966472	1	1	1	0	3	36422355	37422355	1	0
	73	rs11124554	2	36922355	CRIM1	36355926	36551135	0	0	1	0	1	36422355	37422355	0	0
	73	rs11124554	2	36922355	FEZ2	36551427	36646087	0	0	0	0	0	36422355	37422355	0	0
	73	rs11124554	2	36922355	VIT	36696690	36814792	0	0	0	0	0	36422355	37422355	0	0
	73	rs11124554	2	36922355	HEATR5B	36968383	37084342	0	0	1	0	1	36422355	37422355	0	0
	73	rs11124554	2	36922355	GPATCH11	37084451	37099244	0	0	0	0	0	36422355	37422355	0	0
	73	rs11124554	2	36922355	EIF2AK2	37099210	37157065	0	0	0	0	0	36422355	37422355	0	0
	73	rs11124554	2	36922355	SULT6B1	37167820	37196598	0	0	0	0	0	36422355	37422355	0	0
	73	rs11124554	2	36922355	CEBPZ	37201612	37231713	0	0	0	0	0	36422355	37422355	0	0
	73	rs11124554	2	36922355	NDUFAF7	37231631	37253403	0	0	0	0	0	36422355	37422355	0	0
	73	rs11124554	2	36922355	PRKD3	37250502	37324808	0	0	0	0	0	36422355	37422355	0	0
	73	rs11124554	2	36922355	QPCT	37344574	37373322	0	0	0	0	0	36422355	37422355	0	0
	74	rs55921927	2	43621796	THADA	43166661	43596046	0	1	1	1	3	43121796	44121796	1	0
	74	rs55921927	2	43621796	ZFP36L2	43222402	43226609	0	0	1	0	1	43121796	44121796	0	0
	74	rs55921927	2	43621796	PLEKHH2	43637273	43767987	1	0	0	0	1	43121796	44121796	0	0
	74	rs55921927	2	43621796	DYNC2LI1	43774039	43810010	0	0	0	0	0	43121796	44121796	0	0
	74	rs55921927	2	43621796	ABCG5	43812472	43838865	0	0	0	0	0	43121796	44121796	0	0
	74	rs55921927	2	43621796	ABCG8	43838964	43878466	0	0	0	0	0	43121796	44121796	0	0
	74	rs55921927	2	43621796	LRPPRC	43886508	43996005	0	0	0	0	0	43121796	44121796	0	0
	75	rs4076834	2	43854488	ABCG5	43812472	43838865	1	1	1	0	3	43354488	44354488	1	0
	75	rs4076834	2	43854488	THADA	43166661	43596046	0	0	0	0	0	43354488	44354488	0	0
	75	rs4076834	2	43854488	PLEKHH2	43637273	43767987	0	0	0	0	0	43354488	44354488	0	0
	75	rs4076834	2	43854488	DYNC2LI1	43774039	43810010	0	0	0	0	0	43354488	44354488	0	0
	75	rs4076834	2	43854488	ABCG8	43838964	43878466	0	0	1	1	2	43354488	44354488	0	0
	75	rs4076834	2	43854488	LRPPRC	43886508	43996005	0	0	0	0	0	43354488	44354488	0	0
	75	rs4076834	2	43854488	PPM1B	44167969	44244384	0	0	0	0	0	43354488	44354488	0	0
	75	rs4076834	2	43854488	SLC3A1	44275460	44321494	0	0	0	0	0	43354488	44354488	0	0
	75	rs4076834	2	43854488	PREPL	44316281	44361862	0	0	0	0	0	43354488	44354488	0	0
	76	rs3791679	2	55869757	EFEMP1	55865967	55924139	1	1	1	0	3	55369757	56369757	1	0
	76	rs3791679	2	55869757	CCDC88A	55287842	55419921	0	0	0	0	0	55369757	56369757	0	0
	76	rs3791679	2	55869757	CFAP36	55519604	55545879	0	0	1	0	1	55369757	56369757	0	0
	76	rs3791679	2	55869757	PNPT1	55634265	55693910	0	0	1	0	1	55369757	56369757	0	0
	76	rs3791679	2	55869757	CCDC85A	56184123	56386173	0	0	0	0	0	55369757	56369757	0	0
	77	rs17615494	2	58723228	FANCL	58159243	58241372	1	1	0	0	2	58223228	59223228	1	0
	78	rs17328524	2	59934022	BCL11A	60223385	60327332	1	1	1	0	3	59434022	60434022	1	0
	79	rs10445937	2	60410521	BCL11A	60451167	60553567	1	1	0	0	2	59910521	60910521	1	0
	79	rs10445937	2	60410521	PAPOLG	60756230	60802085	0	0	0	0	0	59910521	60910521	0	0
	79	rs10445937	2	60410521	REL	60881521	60931610	0	0	0	0	0	59910521	60910521	0	0
	80	rs7608697	2	60977506	SANBR	61065871	61164825	0	1	1	0	2	60477506	61477506	1	0
	80	rs7608697	2	60977506	BCL11A	60451167	60553567	0	0	0	0	0	60477506	61477506	0	0
	80	rs7608697	2	60977506	PAPOLG	60756230	60802085	0	0	0	0	0	60477506	61477506	0	0
	80	rs7608697	2	60977506	REL	60881521	60931610	0	0	0	0	0	60477506	61477506	0	0
	80	rs7608697	2	60977506	PUS10	60940222	61018259	0	0	1	0	1	60477506	61477506	0	0
	80	rs7608697	2	60977506	PEX13	61017225	61051990	1	0	0	0	1	60477506	61477506	0	0
	80	rs7608697	2	60977506	C2orf74	61145108	61164829	0	0	0	0	0	60477506	61477506	0	0
	80	rs7608697	2	60977506	AHSA2P	61177418	61191203	0	0	0	0	0	60477506	61477506	0	0
	80	rs7608697	2	60977506	USP34	61187463	61470769	0	0	1	0	1	60477506	61477506	0	0
	81	rs113774595	2	61572440	SANBR	61065871	61164825	0	1	1	0	2	61072440	62072440	1	0
	81	rs113774595	2	61572440	C2orf74	61145108	61164829	0	0	0	0	0	61072440	62072440	0	0
	81	rs113774595	2	61572440	AHSA2P	61177418	61191203	0	0	1	0	1	61072440	62072440	0	0
	81	rs113774595	2	61572440	USP34	61187463	61470769	0	0	1	0	1	61072440	62072440	0	0
	81	rs113774595	2	61572440	XPO1	61477849	61538626	1	0	1	0	2	61072440	62072440	0	0
	81	rs113774595	2	61572440	FAM161A	61824854	61854143	0	0	0	0	0	61072440	62072440	0	0
	81	rs113774595	2	61572440	CCT4	61868089	61888804	0	0	0	0	0	61072440	62072440	0	0
	81	rs113774595	2	61572440	COMMD1	61888724	62147247	0	0	0	0	0	61072440	62072440	0	0
	82	rs34532102	2	64678048	SERTAD2	64631621	64751005	1	1	0	0	2	64178048	65178048	1	0
	82	rs34532102	2	64678048	LGALSL	64453969	64461381	0	0	0	0	0	64178048	65178048	0	0
	82	rs34532102	2	64678048	AFTPH	64524331	64593005	0	0	0	0	0	64178048	65178048	0	0
	82	rs34532102	2	64678048	SLC1A4	64988477	65023865	0	0	0	0	0	64178048	65178048	0	0
	82	rs34532102	2	64678048	CEP68	65056366	65087004	0	0	0	0	0	64178048	65178048	0	0
	82	rs34532102	2	64678048	RAB1A	65070701	65130106	0	0	0	0	0	64178048	65178048	0	0
	83	rs67794735	2	65441066	SPRED2	65310851	65432637	1	1	0	0	2	64941066	65941066	1	1
	83	rs67794735	2	65441066	SLC1A4	64988477	65023865	0	0	0	0	0	64941066	65941066	0	1
	83	rs67794735	2	65441066	CEP68	65056366	65087004	0	0	0	0	0	64941066	65941066	0	1
	83	rs67794735	2	65441066	RAB1A	65070701	65130106	0	0	0	0	0	64941066	65941066	0	1
	83	rs67794735	2	65441066	ACTR2	65227753	65271253	0	0	0	0	0	64941066	65941066	0	1
	84	rs1437461	2	65452578	SPRED2	65310851	65432637	1	1	1	0	3	64952578	65952578	1	0
	84	rs1437461	2	65452578	SLC1A4	64988477	65023865	0	0	0	0	0	64952578	65952578	0	0
	84	rs1437461	2	65452578	CEP68	65056366	65087004	0	0	0	0	0	64952578	65952578	0	0
	84	rs1437461	2	65452578	RAB1A	65070701	65130106	0	0	0	0	0	64952578	65952578	0	0
	84	rs1437461	2	65452578	ACTR2	65227753	65271253	0	0	0	0	0	64952578	65952578	0	0
	85	rs56885830	2	69061076	ANTXR1	69013178	69249327	1	1	0	0	2	68561076	69561076	1	0
	85	rs56885830	2	69061076	APLF	68467561	68630872	0	0	0	0	0	68561076	69561076	0	0
	85	rs56885830	2	69061076	PROKR1	68643589	68655576	0	0	0	0	0	68561076	69561076	0	0
	85	rs56885830	2	69061076	ARHGAP25	68679601	68826833	0	0	0	0	0	68561076	69561076	0	0
	85	rs56885830	2	69061076	BMP10	68865481	68871517	0	0	0	0	0	68561076	69561076	0	0
	85	rs56885830	2	69061076	GKN2	68945232	68952970	0	0	0	0	0	68561076	69561076	0	0
	85	rs56885830	2	69061076	GKN1	68974573	68980974	0	0	0	0	0	68561076	69561076	0	0
	85	rs56885830	2	69061076	GFPT1	69319773	69387250	0	0	1	0	1	68561076	69561076	0	0
	85	rs56885830	2	69061076	NFU1	69395750	69437628	0	0	1	0	1	68561076	69561076	0	0
	85	rs56885830	2	69061076	AAK1	69461400	69674349	0	0	1	0	1	68561076	69561076	0	0
	86	rs6546856	2	73610624	ALMS1	73448101	73610793	0	0	1	1	2	73110624	74110624	1	0
	86	rs6546856	2	73610624	RAB11FIP5	73073382	73156721	0	0	0	0	0	73110624	74110624	0	0
	86	rs6546856	2	73610624	NOTO	73202258	73212513	0	0	0	0	0	73110624	74110624	0	0
	86	rs6546856	2	73610624	SMYD5	73214222	73227237	0	0	0	0	0	73110624	74110624	0	0
	86	rs6546856	2	73610624	PRADC1	73228006	73233238	0	0	0	0	0	73110624	74110624	0	0
	86	rs6546856	2	73610624	CCT7	73233420	73253021	0	0	0	0	0	73110624	74110624	0	0
	86	rs6546856	2	73610624	FBXO41	73254682	73284431	0	0	1	0	1	73110624	74110624	0	0
	86	rs6546856	2	73610624	EGR4	73290930	73293705	0	0	0	0	0	73110624	74110624	0	0
	86	rs6546856	2	73610624	NAT8	73640832	73642393	1	0	1	0	2	73110624	74110624	0	0
	86	rs6546856	2	73610624	TPRKB	73729104	73737400	0	0	1	0	1	73110624	74110624	0	0
	86	rs6546856	2	73610624	DUSP11	73762184	73780157	0	0	1	0	1	73110624	74110624	0	0
	86	rs6546856	2	73610624	C2orf78	73784189	73817147	0	0	0	0	0	73110624	74110624	0	0
	86	rs6546856	2	73610624	STAMBP	73828959	73873659	0	1	0	0	1	73110624	74110624	0	0
	86	rs6546856	2	73610624	ACTG2	73892314	73919865	0	0	0	0	0	73110624	74110624	0	0
	86	rs6546856	2	73610624	DGUOK	73926826	73958961	0	0	0	0	0	73110624	74110624	0	0
	86	rs6546856	2	73610624	TET3	74002713	74108176	0	0	0	0	0	73110624	74110624	0	0
	87	rs1882348	2	102368211	IL1RL1	102311502	102352037	0	1	1	0	2	101868211	102868211	1	0
	87	rs1882348	2	102368211	MAP4K4	101696850	101894687	0	0	0	0	0	101868211	102868211	0	0
	87	rs1882348	2	102368211	IL1R2	101991844	102028544	0	0	1	0	1	101868211	102868211	0	0
	87	rs1882348	2	102368211	IL1R1	102064544	102179874	0	0	1	0	1	101868211	102868211	0	0
	87	rs1882348	2	102368211	IL1RL2	102186973	102240002	0	0	1	0	1	101868211	102868211	0	0
	87	rs1882348	2	102368211	IL18R1	102311529	102398758	0	0	1	0	1	101868211	102868211	0	0
	87	rs1882348	2	102368211	IL18RAP	102418689	102452565	1	0	1	0	2	101868211	102868211	0	0
	87	rs1882348	2	102368211	SLC9A4	102473303	102533972	0	0	0	0	0	101868211	102868211	0	0
	87	rs1882348	2	102368211	SLC9A2	102619707	102711318	0	0	1	0	1	101868211	102868211	0	0
	87	rs1882348	2	102368211	MFSD9	102715840	102736888	0	0	0	0	0	101868211	102868211	0	0
	87	rs1882348	2	102368211	TMEM182	102736908	102843893	0	0	0	0	0	101868211	102868211	0	0
	88	rs3827538	2	111049726	BCL2L11	111119378	111168447	1	1	0	0	2	110549726	111549726	1	0
	88	rs3827538	2	111049726	RGPD6	110513812	110577185	0	0	0	0	0	110549726	111549726	0	0
	88	rs3827538	2	111049726	BUB1	110637698	110678114	0	0	0	0	0	110549726	111549726	0	0
	88	rs3827538	2	111049726	ACOXL	110732573	111118222	0	0	1	0	1	110549726	111549726	0	0
	89	rs58055674	2	111074216	BCL2L11	111119378	111168447	1	1	0	0	2	110574216	111574216	1	0
	89	rs58055674	2	111074216	RGPD6	110513812	110577185	0	0	0	0	0	110574216	111574216	0	0
	89	rs58055674	2	111074216	BUB1	110637698	110678114	0	0	0	0	0	110574216	111574216	0	0
	89	rs58055674	2	111074216	ACOXL	110732573	111118222	0	0	0	0	0	110574216	111574216	0	0
	90	rs10174596	2	119749849	PTPN4	119759631	119983818	1	1	1	0	3	119249849	120249849	1	0
	90	rs10174596	2	119749849	STEAP3	119223808	119265652	0	0	0	0	0	119249849	120249849	0	0
	90	rs10174596	2	119749849	C2orf76	119302225	119366828	0	0	0	0	0	119249849	120249849	0	0
	90	rs10174596	2	119749849	DBI	119366921	119372550	0	0	0	0	0	119249849	120249849	0	0
	90	rs10174596	2	119749849	TMEM37	119429901	119438520	0	0	0	0	0	119249849	120249849	0	0
	90	rs10174596	2	119749849	SCTR	119439843	119524494	0	0	0	0	0	119249849	120249849	0	0
	90	rs10174596	2	119749849	CFAP221	119544432	119662251	0	0	0	0	0	119249849	120249849	0	0
	90	rs10174596	2	119749849	TMEM177	119679167	119686507	0	0	0	0	0	119249849	120249849	0	0
	90	rs10174596	2	119749849	EPB41L5	120013005	120179119	0	0	1	0	1	119249849	120249849	0	0
	90	rs10174596	2	119749849	TMEM185B	120221278	120223408	0	0	1	0	1	119249849	120249849	0	0
	90	rs10174596	2	119749849	RALB	120240064	120294713	0	0	1	0	1	119249849	120249849	0	0
	91	rs1078441	2	121231495	TFCP2L1	121216587	121285207	1	1	0	0	2	120731495	121731495	1	0
	91	rs1078441	2	121231495	GLI2	120881869	120992653	0	0	0	0	0	120731495	121731495	0	0
	91	rs1078441	2	121231495	CLASP1	121337776	121649587	0	0	0	0	0	120731495	121731495	0	0
	91	rs1078441	2	121231495	NIFK	121726945	121736923	0	0	0	0	0	120731495	121731495	0	0
	92	rs2579022	2	144916508	ZEB2	144384081	144524580	1	1	1	0	3	144416508	145416508	1	0
	93	rs7423572	2	160487551	RBMS1	160272151	160493794	1	1	0	0	2	159987551	160987551	1	0
	93	rs7423572	2	160487551	PLA2R1	159932008	160062610	0	0	0	0	0	159987551	160987551	0	0
	93	rs7423572	2	160487551	ITGB6	160099666	160271888	0	0	1	0	1	159987551	160987551	0	0
	94	rs75166367	2	162107791	DPP4	161992241	162074542	1	1	1	0	3	161607791	162607791	1	0
	94	rs75166367	2	162107791	SLC4A10	161508729	161985282	0	0	0	0	0	161607791	162607791	0	0
	94	rs75166367	2	162107791	GCG	162142882	162152404	0	0	0	0	0	161607791	162607791	0	0
	94	rs75166367	2	162107791	FAP	162170684	162245151	0	0	0	0	0	161607791	162607791	0	0
	94	rs75166367	2	162107791	IFIH1	162267079	162318703	0	0	0	0	0	161607791	162607791	0	0
	94	rs75166367	2	162107791	GCA	162318840	162371595	0	0	0	0	0	161607791	162607791	0	0
	94	rs75166367	2	162107791	KCNH7	162371407	162838730	0	0	0	0	0	161607791	162607791	0	0
	95	rs2111485	2	162254026	FAP	162170684	162245151	1	1	0	0	2	161754026	162754026	1	0
	95	rs2111485	2	162254026	SLC4A10	161508729	161985282	0	0	0	0	0	161754026	162754026	0	0
	95	rs2111485	2	162254026	DPP4	161992241	162074542	0	0	0	0	0	161754026	162754026	0	0
	95	rs2111485	2	162254026	GCG	162142882	162152404	0	0	0	0	0	161754026	162754026	0	0
	95	rs2111485	2	162254026	IFIH1	162267079	162318703	0	0	0	0	0	161754026	162754026	0	0
	95	rs2111485	2	162254026	GCA	162318840	162371595	0	0	0	0	0	161754026	162754026	0	0
	95	rs2111485	2	162254026	KCNH7	162371407	162838730	0	0	0	0	0	161754026	162754026	0	0
	96	rs10184004	2	164651879	COBLL1	164653624	164843679	0	1	1	0	2	164151879	165151879	1	1
	96	rs10184004	2	164651879	GRB14	164492812	164621848	1	0	0	0	1	164151879	165151879	0	1
	96	rs10184004	2	164651879	SLC38A11	164896186	164955525	0	0	0	0	0	164151879	165151879	0	1
	96	rs10184004	2	164651879	SCN3A	165087522	165204067	0	0	0	0	0	164151879	165151879	0	1
	97	rs16856530	2	169155689	CERS6	168455862	168775134	0	0	0	0	0	168655689	169655689	0	0
	97	rs16856530	2	169155689	NOSTRIN	168786539	168865514	0	0	0	0	0	168655689	169655689	0	0
	97	rs16856530	2	169155689	SPC25	168834132	168913371	0	0	0	0	0	168655689	169655689	0	0
	97	rs16856530	2	169155689	G6PC2	168901240	168909995	0	0	0	0	0	168655689	169655689	0	0
	97	rs16856530	2	169155689	ABCB11	168922938	169031322	0	0	0	0	0	168655689	169655689	0	0
	97	rs16856530	2	169155689	DHRS9	169064789	169096167	1	0	0	0	1	168655689	169655689	0	0
	97	rs16856530	2	169155689	LRP2	169127109	169362685	0	1	0	0	1	168655689	169655689	0	0
	97	rs16856530	2	169155689	BBS5	169479178	169525922	0	0	0	0	0	168655689	169655689	0	0
	97	rs16856530	2	169155689	KLHL41	169509702	169526262	0	0	0	0	0	168655689	169655689	0	0
	97	rs16856530	2	169155689	FASTKD1	169529749	169573875	0	0	0	0	0	168655689	169655689	0	0
	97	rs16856530	2	169155689	PPIG	169584340	169641406	0	0	0	0	0	168655689	169655689	0	0
	97	rs16856530	2	169155689	CFAP210	169645425	169694433	0	0	0	0	0	168655689	169655689	0	0
	98	rs10490606	2	171052679	GORASP2	170928464	170967129	1	1	0	0	2	170552679	171552679	1	0
	98	rs10490606	2	171052679	MYO3B	170178145	170655171	0	0	0	0	0	170552679	171552679	0	0
	98	rs10490606	2	171052679	SP5	170715351	170718078	0	0	0	0	0	170552679	171552679	0	0
	98	rs10490606	2	171052679	ERICH2	170783786	170798971	0	0	0	0	0	170552679	171552679	0	0
	98	rs10490606	2	171052679	GAD1	170813213	170861151	0	0	0	0	0	170552679	171552679	0	0
	98	rs10490606	2	171052679	TLK1	170990823	171231314	0	0	1	0	1	170552679	171552679	0	0
	98	rs10490606	2	171052679	METTL8	171317409	171434802	0	0	0	0	0	170552679	171552679	0	0
	98	rs10490606	2	171052679	DCAF17	171434217	171485052	0	0	0	0	0	170552679	171552679	0	0
	98	rs10490606	2	171052679	CYBRD1	171522247	171558133	0	0	0	0	0	170552679	171552679	0	0
	99	rs73978133	2	176004276	LNPK	175923892	176002839	1	1	1	0	3	175504276	176504276	1	0
	99	rs73978133	2	176004276	EVX2	176077472	176083913	0	0	0	0	0	175504276	176504276	0	0
	99	rs73978133	2	176004276	HOXD13	176092891	176095938	0	0	0	0	0	175504276	176504276	0	0
	99	rs73978133	2	176004276	HOXD12	176099730	176101680	0	0	0	0	0	175504276	176504276	0	0
	99	rs73978133	2	176004276	HOXD11	176104216	176109994	0	0	0	0	0	175504276	176504276	0	0
	99	rs73978133	2	176004276	HOXD10	176108790	176119942	0	0	0	1	1	175504276	176504276	0	0
	99	rs73978133	2	176004276	HOXD9	176122360	176125125	0	0	0	0	0	175504276	176504276	0	0
	99	rs73978133	2	176004276	HOXD8	176129694	176132695	0	0	0	0	0	175504276	176504276	0	0
	99	rs73978133	2	176004276	HOXD3	176136612	176173102	0	0	0	0	0	175504276	176504276	0	0
	99	rs73978133	2	176004276	HOXD4	176151222	176153226	0	0	0	0	0	175504276	176504276	0	0
	99	rs73978133	2	176004276	HOXD1	176188579	176190960	0	0	0	0	0	175504276	176504276	0	0
	99	rs73978133	2	176004276	MTX2	176269395	176338025	0	0	0	0	0	175504276	176504276	0	0
	100	rs13029501	2	181470026	ITGA4	181457202	181536187	1	1	1	0	3	180970026	181970026	1	0
	100	rs13029501	2	181470026	UBE2E3	180967248	181076585	0	0	0	0	0	180970026	181970026	0	0
	100	rs13029501	2	181470026	CERKL	181536676	181680665	0	0	1	0	1	180970026	181970026	0	0
	100	rs13029501	2	181470026	NEUROD1	181673088	181680876	0	0	0	0	0	180970026	181970026	0	0
	100	rs13029501	2	181470026	ITPRID2	181891833	181930738	0	0	0	0	0	180970026	181970026	0	0
	100	rs13029501	2	181470026	PPP1R1C	181954241	182131398	0	0	0	0	0	180970026	181970026	0	0
	101	rs3821236	2	191038032	NAB1	190646746	190692766	0	0	1	0	1	190538032	191538032	0	0
	101	rs3821236	2	191038032	GLS	190880827	190965552	0	0	0	0	0	190538032	191538032	0	0
	101	rs3821236	2	191038032	STAT1	190964358	191020960	1	0	0	0	1	190538032	191538032	0	0
	101	rs3821236	2	191038032	STAT4	191029576	191151596	0	1	0	0	1	190538032	191538032	0	0
	101	rs3821236	2	191038032	MYO1B	191245185	191425389	0	0	0	0	0	190538032	191538032	0	0
	102	rs788015	2	197364216	COQ10B	197453423	197475308	0	0	1	1	2	196864216	197864216	1	0
	102	rs788015	2	197364216	PGAP1	196833004	196927796	0	0	0	0	0	196864216	197864216	0	0
	102	rs788015	2	197364216	ANKRD44	196967017	197311173	1	1	0	0	2	196864216	197864216	0	0
	102	rs788015	2	197364216	SF3B1	197389784	197435091	0	0	0	0	0	196864216	197864216	0	0
	102	rs788015	2	197364216	HSPD1	197486581	197516737	0	0	0	1	1	196864216	197864216	0	0
	102	rs788015	2	197364216	HSPE1	197499994	197503457	0	0	0	0	0	196864216	197864216	0	0
	102	rs788015	2	197364216	MOB4	197515571	197553699	0	0	0	0	0	196864216	197864216	0	0
	102	rs788015	2	197364216	RFTN2	197568224	197676045	0	0	1	0	1	196864216	197864216	0	0
	102	rs788015	2	197364216	MARS2	197705363	197708389	0	0	0	0	0	196864216	197864216	0	0
	102	rs788015	2	197364216	BOLL	197726879	197786762	0	0	0	0	0	196864216	197864216	0	0
	102	rs788015	2	197364216	PLCL1	197804702	198572581	0	0	1	0	1	196864216	197864216	0	0
	103	rs11695021	2	198933929	PLCL1	197804702	198572581	0	0	0	0	0	198433929	199433929	0	0
	103	rs11695021	2	198933929	SATB2	199269500	199471266	0	1	0	0	1	198433929	199433929	0	0
	104	rs74853338	2	200306928	SPATS2L	200305881	200482263	1	1	1	0	3	199806928	200806928	1	0
	104	rs74853338	2	200306928	FTCDNL1	199760544	199851173	0	0	1	0	1	199806928	200806928	0	0
	104	rs74853338	2	200306928	C2orf69	199911256	199955935	0	0	0	0	0	199806928	200806928	0	0
	104	rs74853338	2	200306928	TYW5	199929975	199955736	0	0	0	0	0	199806928	200806928	0	0
	104	rs74853338	2	200306928	MAIP1	199955317	200008540	0	0	0	0	0	199806928	200806928	0	0
	104	rs74853338	2	200306928	KCTD18	200488952	200519784	0	0	0	0	0	199806928	200806928	0	0
	104	rs74853338	2	200306928	SGO2	200510008	200583782	0	0	0	0	0	199806928	200806928	0	0
	104	rs74853338	2	200306928	AOX1	200585868	200677064	0	0	0	0	0	199806928	200806928	0	0
	105	rs1971740	2	202620013	FAM117B	202635178	202769757	1	1	1	0	3	202120013	203120013	1	0
	105	rs1971740	2	202620013	SUMO1	202206180	202238608	0	0	0	0	0	202120013	203120013	0	0
	105	rs1971740	2	202620013	NOP58	202265716	202303666	0	0	1	0	1	202120013	203120013	0	0
	105	rs1971740	2	202620013	BMPR2	202376936	202567751	0	0	1	0	1	202120013	203120013	0	0
	105	rs1971740	2	202620013	ICA1L	202775967	202871985	0	0	0	0	0	202120013	203120013	0	0
	105	rs1971740	2	202620013	WDR12	202874782	203014798	0	0	0	0	0	202120013	203120013	0	0
	105	rs1971740	2	202620013	CARF	202912214	202987063	0	0	0	0	0	202120013	203120013	0	0
	105	rs1971740	2	202620013	NBEAL1	203014879	203226378	0	0	0	0	0	202120013	203120013	0	0
	106	rs3116488	2	203721353	CD28	203706475	203738912	1	1	0	0	2	203221353	204221353	1	0
	106	rs3116488	2	203721353	NBEAL1	203014879	203226378	0	0	0	0	0	203221353	204221353	0	0
	106	rs3116488	2	203721353	CYP20A1	203238940	203298286	0	0	0	0	0	203221353	204221353	0	0
	106	rs3116488	2	203721353	ABI2	203328219	203447723	0	0	0	0	0	203221353	204221353	0	0
	106	rs3116488	2	203721353	RAPH1	203394345	203535410	0	0	0	0	0	203221353	204221353	0	0
	106	rs3116488	2	203721353	CTLA4	203867786	203873960	0	0	0	0	0	203221353	204221353	0	0
	106	rs3116488	2	203721353	ICOS	203936748	203961577	0	0	0	0	0	203221353	204221353	0	0
	107	rs1047891	2	210675783	CPS1	210477682	210679107	1	1	0	1	3	210175783	211175783	1	0
	107	rs1047891	2	210675783	ACADL	210187939	210225491	0	0	0	0	0	210175783	211175783	0	0
	107	rs1047891	2	210675783	MYL1	210290150	210315190	0	0	0	0	0	210175783	211175783	0	0
	107	rs1047891	2	210675783	LANCL1	210431249	210477652	0	0	0	0	0	210175783	211175783	0	0
	108	rs12622529	2	217255937	TNP1	216859458	216860064	1	1	0	0	2	216755937	217755937	1	1
	108	rs12622529	2	217255937	DIRC3	217284019	217756593	0	0	0	0	0	216755937	217755937	0	1
	109	rs12694411	2	217281820	TNP1	216859458	216860064	1	1	0	0	2	216781820	217781820	1	0
	109	rs12694411	2	217281820	DIRC3	217284019	217756593	0	0	1	0	1	216781820	217781820	0	0
	110	rs7580751	2	218104198	CXCR2	218125289	218137253	1	0	1	1	3	217604198	218604198	1	0
	110	rs7580751	2	218104198	DIRC3	217284019	217756593	0	0	1	0	1	217604198	218604198	0	0
	110	rs7580751	2	218104198	TNS1	217799789	218002995	0	0	0	0	0	217604198	218604198	0	0
	110	rs7580751	2	218104198	RUFY4	218034960	218090581	0	0	0	0	0	217604198	218604198	0	0
	110	rs7580751	2	218104198	CXCR1	218162845	218166995	0	0	1	0	1	217604198	218604198	0	0
	110	rs7580751	2	218104198	ARPC2	218217094	218254356	0	0	1	0	1	217604198	218604198	0	0
	110	rs7580751	2	218104198	GPBAR1	218259496	218263859	0	0	1	0	1	217604198	218604198	0	0
	110	rs7580751	2	218104198	AAMP	218264127	218270257	0	0	1	0	1	217604198	218604198	0	0
	110	rs7580751	2	218104198	PNKD	218270392	218346793	0	0	1	0	1	217604198	218604198	0	0
	110	rs7580751	2	218104198	TMBIM1	218274192	218292586	0	1	1	0	2	217604198	218604198	0	0
	110	rs7580751	2	218104198	CATIP	218356856	218368099	0	0	0	0	0	217604198	218604198	0	0
	110	rs7580751	2	218104198	SLC11A1	218382029	218396894	0	0	0	0	0	217604198	218604198	0	0
	110	rs7580751	2	218104198	CTDSP1	218398256	218405941	0	0	0	0	0	217604198	218604198	0	0
	110	rs7580751	2	218104198	VIL1	218419092	218453295	0	0	0	0	0	217604198	218604198	0	0
	110	rs7580751	2	218104198	USP37	218450251	218568361	0	0	0	0	0	217604198	218604198	0	0
	110	rs7580751	2	218104198	CNOT9	218568580	218597080	0	0	0	0	0	217604198	218604198	0	0
	111	rs148475840	2	221786480	EPHA4	221418027	221574202	1	1	0	0	2	221286480	222286480	1	0
	111	rs148475840	2	221786480	PAX3	222199888	222298996	0	0	0	0	0	221286480	222286480	0	0
	113	rs7574953	2	227805671	CCL20	227813842	227817556	1	1	0	0	2	227305671	228305671	1	0
	113	rs7574953	2	227805671	COL4A3	227164565	227314792	0	0	0	0	0	227305671	228305671	0	0
	113	rs7574953	2	227805671	MFF	227325151	227357834	0	0	0	0	0	227305671	228305671	0	0
	113	rs7574953	2	227805671	TM4SF20	227362156	227381995	0	0	0	0	0	227305671	228305671	0	0
	113	rs7574953	2	227805671	AGFG1	227472152	227561214	0	0	0	0	0	227305671	228305671	0	0
	113	rs7574953	2	227805671	SLC19A4P	227610090	227633320	0	0	0	0	0	227305671	228305671	0	0
	113	rs7574953	2	227805671	SLC19A3	227685210	227718012	0	0	0	0	0	227305671	228305671	0	0
	113	rs7574953	2	227805671	DAW1	227871054	227924344	0	0	0	0	0	227305671	228305671	0	0
	113	rs7574953	2	227805671	SPHKAP	227979950	228181645	0	0	0	0	0	227305671	228305671	0	0
	114	rs7582543	2	230268450	TRIP12	229763838	229923239	0	0	0	0	0	229768450	230768450	0	0
	114	rs7582543	2	230268450	FBXO36	229922302	230013109	0	0	0	0	0	229768450	230768450	0	0
	114	rs7582543	2	230268450	SLC16A14	230034982	230068999	0	0	0	0	0	229768450	230768450	0	0
	114	rs7582543	2	230268450	SP110	230167293	230205020	0	0	0	0	0	229768450	230768450	0	0
	114	rs7582543	2	230268450	SP140	230205022	230359047	1	0	0	0	1	229768450	230768450	0	0
	114	rs7582543	2	230268450	SP140L	230327184	230403732	0	0	0	0	0	229768450	230768450	0	0
	114	rs7582543	2	230268450	SP100	230415942	230544090	0	0	0	0	0	229768450	230768450	0	0
	114	rs7582543	2	230268450	CAB39	230712845	230821075	0	0	0	0	0	229768450	230768450	0	0
	115	rs2119505	2	233246005	ATG16L1	233210051	233295674	1	1	1	0	3	232746005	233746005	1	0
	115	rs2119505	2	233246005	GIGYF2	232697299	232860575	0	0	0	0	0	232746005	233746005	0	0
	115	rs2119505	2	233246005	KCNJ13	232766464	232776568	0	0	0	0	0	232746005	233746005	0	0
	115	rs2119505	2	233246005	SNORC	232857270	232878708	0	0	0	0	0	232746005	233746005	0	0
	115	rs2119505	2	233246005	NGEF	232878686	233013272	0	0	0	0	0	232746005	233746005	0	0
	115	rs2119505	2	233246005	NEU2	233032672	233035057	0	0	0	0	0	232746005	233746005	0	0
	115	rs2119505	2	233246005	INPP5D	233059967	233139031	0	0	0	0	0	232746005	233746005	0	0
	115	rs2119505	2	233246005	SAG	233307816	233347055	0	0	0	0	0	232746005	233746005	0	0
	115	rs2119505	2	233246005	DGKD	233354507	233472104	0	0	0	0	0	232746005	233746005	0	0
	115	rs2119505	2	233246005	USP40	233475520	233566782	0	0	0	0	0	232746005	233746005	0	0
	115	rs2119505	2	233246005	UGT1A1	233617645	233773310	0	0	0	0	0	232746005	233746005	0	0
	115	rs2119505	2	233246005	UGT1A10	233636454	233773305	0	0	0	0	0	232746005	233746005	0	0
	115	rs2119505	2	233246005	UGT1A9	233671853	233773300	0	0	0	0	0	232746005	233746005	0	0
	115	rs2119505	2	233246005	UGT1A7	233681938	233773299	0	0	0	0	0	232746005	233746005	0	0
	115	rs2119505	2	233246005	UGT1A6	233691607	233773300	0	0	0	0	0	232746005	233746005	0	0
	115	rs2119505	2	233246005	UGT1A4	233718778	233773299	0	0	0	0	0	232746005	233746005	0	0
	116	rs17863787	2	233702448	UGT1A6	233691607	233773300	0	1	1	1	3	233202448	234202448	1	0
	116	rs17863787	2	233702448	ATG16L1	233210051	233295674	0	0	0	0	0	233202448	234202448	0	0
	116	rs17863787	2	233702448	SAG	233307816	233347055	0	0	0	0	0	233202448	234202448	0	0
	116	rs17863787	2	233702448	DGKD	233354507	233472104	0	0	0	0	0	233202448	234202448	0	0
	116	rs17863787	2	233702448	USP40	233475520	233566782	0	0	0	0	0	233202448	234202448	0	0
	116	rs17863787	2	233702448	UGT1A1	233617645	233773310	0	0	0	0	0	233202448	234202448	0	0
	116	rs17863787	2	233702448	UGT1A10	233636454	233773305	0	0	0	0	0	233202448	234202448	0	0
	116	rs17863787	2	233702448	UGT1A9	233671853	233773300	0	0	0	0	0	233202448	234202448	0	0
	116	rs17863787	2	233702448	UGT1A7	233681938	233773299	0	0	1	0	1	233202448	234202448	0	0
	116	rs17863787	2	233702448	UGT1A4	233718778	233773299	0	0	0	0	0	233202448	234202448	0	0
	116	rs17863787	2	233702448	UGT1A8	233760248	233773299	0	0	0	0	0	233202448	234202448	0	0
	116	rs17863787	2	233702448	MROH2A	233775724	233833423	0	0	0	0	0	233202448	234202448	0	0
	116	rs17863787	2	233702448	HJURP	233833416	233854566	0	0	0	0	0	233202448	234202448	0	0
	116	rs17863787	2	233702448	TRPM8	233935695	234019522	0	0	0	0	0	233202448	234202448	0	0
	116	rs17863787	2	233702448	SPP2	234050679	234077134	0	0	0	0	0	233202448	234202448	0	0
	117	rs2720102	2	236679892	ASB18	236193452	236264409	0	0	0	0	0	236179892	237179892	0	0
	117	rs2720102	2	236679892	IQCA1	236324151	236507542	0	0	0	0	0	236179892	237179892	0	0
	117	rs2720102	2	236679892	ACKR3	236567787	236582358	0	0	0	0	0	236179892	237179892	0	0
	117	rs2720102	2	236679892	COPS8	237085312	237100466	0	0	0	0	0	236179892	237179892	0	0
	118	rs34236350	2	240628909	GPR35	240605431	240631259	1	1	1	1	4	240128909	241128909	1	0
	118	rs34236350	2	240628909	COPS9	240126563	240136807	0	0	0	0	0	240128909	241128909	0	0
	118	rs34236350	2	240628909	OTOS	240139029	240144562	0	0	0	0	0	240128909	241128909	0	0
	118	rs34236350	2	240628909	GPC1	240435671	240468076	0	0	0	0	0	240128909	241128909	0	0
	118	rs34236350	2	240628909	ANKMY1	240479422	240569209	0	0	0	0	0	240128909	241128909	0	0
	118	rs34236350	2	240628909	DUSP28	240560054	240564014	0	0	0	0	0	240128909	241128909	0	0
	118	rs34236350	2	240628909	RNPEPL1	240565804	240581372	0	0	0	0	0	240128909	241128909	0	0
	118	rs34236350	2	240628909	CAPN10	240586716	240617705	0	0	1	0	1	240128909	241128909	0	0
	118	rs34236350	2	240628909	AQP12B	240676418	240682906	0	0	0	0	0	240128909	241128909	0	0
	118	rs34236350	2	240628909	AQP12A	240691845	240698483	0	0	0	0	0	240128909	241128909	0	0
	118	rs34236350	2	240628909	KIF1A	240713764	240820308	0	0	0	0	0	240128909	241128909	0	0
	118	rs34236350	2	240628909	AGXT	240868479	240880502	0	0	0	0	0	240128909	241128909	0	0
	118	rs34236350	2	240628909	MAB21L4	240886048	240896889	0	0	0	0	0	240128909	241128909	0	0
	118	rs34236350	2	240628909	SNED1	240998838	241064802	0	0	0	0	0	240128909	241128909	0	0
	118	rs34236350	2	240628909	MTERF4	241072169	241102332	0	0	0	0	0	240128909	241128909	0	0
	118	rs34236350	2	240628909	PASK	241106099	241150264	0	0	0	0	0	240128909	241128909	0	0
	119	rs12471544	2	240967008	GPC1	240435671	240468076	0	0	0	0	0	240467008	241467008	0	0
	119	rs12471544	2	240967008	ANKMY1	240479422	240569209	0	0	0	0	0	240467008	241467008	0	0
	119	rs12471544	2	240967008	DUSP28	240560054	240564014	0	0	0	0	0	240467008	241467008	0	0
	119	rs12471544	2	240967008	RNPEPL1	240565804	240581372	0	0	0	0	0	240467008	241467008	0	0
	119	rs12471544	2	240967008	CAPN10	240586716	240617705	0	0	1	0	1	240467008	241467008	0	0
	119	rs12471544	2	240967008	GPR35	240605431	240631259	0	0	0	0	0	240467008	241467008	0	0
	119	rs12471544	2	240967008	AQP12B	240676418	240682906	0	0	0	0	0	240467008	241467008	0	0
	119	rs12471544	2	240967008	AQP12A	240691845	240698483	0	0	0	0	0	240467008	241467008	0	0
	119	rs12471544	2	240967008	KIF1A	240713764	240820308	0	0	0	0	0	240467008	241467008	0	0
	119	rs12471544	2	240967008	AGXT	240868479	240880502	0	0	0	0	0	240467008	241467008	0	0
	119	rs12471544	2	240967008	MAB21L4	240886048	240896889	0	0	1	0	1	240467008	241467008	0	0
	119	rs12471544	2	240967008	SNED1	240998838	241064802	1	0	0	0	1	240467008	241467008	0	0
	119	rs12471544	2	240967008	MTERF4	241072169	241102332	0	0	0	0	0	240467008	241467008	0	0
	119	rs12471544	2	240967008	PASK	241106099	241150264	0	0	0	0	0	240467008	241467008	0	0
	119	rs12471544	2	240967008	PPP1R7	241149576	241183652	0	0	0	0	0	240467008	241467008	0	0
	119	rs12471544	2	240967008	ANO7	241188509	241225377	0	0	0	0	0	240467008	241467008	0	0
	119	rs12471544	2	240967008	HDLBP	241227264	241317061	0	0	0	0	0	240467008	241467008	0	0
	119	rs12471544	2	240967008	SEPTIN2	241315100	241354027	0	0	0	0	0	240467008	241467008	0	0
	119	rs12471544	2	240967008	FARP2	241356243	241494841	0	0	0	0	0	240467008	241467008	0	0
	120	rs2286323	2	241097382	MTERF4	241072169	241102332	1	1	1	1	4	240597382	241597382	1	0
	120	rs2286323	2	241097382	CAPN10	240586716	240617705	0	0	0	0	0	240597382	241597382	0	0
	120	rs2286323	2	241097382	GPR35	240605431	240631259	0	0	0	0	0	240597382	241597382	0	0
	120	rs2286323	2	241097382	AQP12B	240676418	240682906	0	0	0	0	0	240597382	241597382	0	0
	120	rs2286323	2	241097382	AQP12A	240691845	240698483	0	0	0	0	0	240597382	241597382	0	0
	120	rs2286323	2	241097382	KIF1A	240713764	240820308	0	0	0	0	0	240597382	241597382	0	0
	120	rs2286323	2	241097382	AGXT	240868479	240880502	0	0	0	0	0	240597382	241597382	0	0
	120	rs2286323	2	241097382	MAB21L4	240886048	240896889	0	0	0	0	0	240597382	241597382	0	0
	120	rs2286323	2	241097382	SNED1	240998838	241064802	0	0	1	0	1	240597382	241597382	0	0
	120	rs2286323	2	241097382	PASK	241106099	241150264	0	0	1	0	1	240597382	241597382	0	0
	120	rs2286323	2	241097382	PPP1R7	241149576	241183652	0	0	1	0	1	240597382	241597382	0	0
	120	rs2286323	2	241097382	ANO7	241188509	241225377	0	0	0	0	0	240597382	241597382	0	0
	120	rs2286323	2	241097382	HDLBP	241227264	241317061	0	0	0	0	0	240597382	241597382	0	0
	120	rs2286323	2	241097382	SEPTIN2	241315100	241354027	0	0	0	0	0	240597382	241597382	0	0
	120	rs2286323	2	241097382	FARP2	241356243	241494841	0	0	1	0	1	240597382	241597382	0	0
	120	rs2286323	2	241097382	STK25	241492674	241509730	0	0	0	0	0	240597382	241597382	0	0
	120	rs2286323	2	241097382	BOK	241558721	241574131	0	0	0	0	0	240597382	241597382	0	0
	120	rs2286323	2	241097382	THAP4	241584405	241637449	0	0	0	0	0	240597382	241597382	0	0
	121	rs2293764	2	241816853	NEU4	241815425	241817413	1	0	1	1	3	241316853	242316853	1	0
	121	rs2293764	2	241816853	HDLBP	241227264	241317061	0	0	0	0	0	241316853	242316853	0	0
	121	rs2293764	2	241816853	SEPTIN2	241315100	241354027	0	0	0	0	0	241316853	242316853	0	0
	121	rs2293764	2	241816853	FARP2	241356243	241494841	0	0	0	0	0	241316853	242316853	0	0
	121	rs2293764	2	241816853	STK25	241492674	241509730	0	0	0	0	0	241316853	242316853	0	0
	121	rs2293764	2	241816853	BOK	241558721	241574131	0	0	0	0	0	241316853	242316853	0	0
	121	rs2293764	2	241816853	THAP4	241584405	241637449	0	0	0	0	0	241316853	242316853	0	0
	121	rs2293764	2	241816853	ATG4B	241637213	241673857	0	0	0	0	0	241316853	242316853	0	0
	121	rs2293764	2	241816853	DTYMK	241675742	241686991	0	0	0	0	0	241316853	242316853	0	0
	121	rs2293764	2	241816853	ING5	241702035	241729478	0	0	0	0	0	241316853	242316853	0	0
	121	rs2293764	2	241816853	D2HGDH	241734579	241768816	0	0	0	0	0	241316853	242316853	0	0
	121	rs2293764	2	241816853	GAL3ST2	241776825	241804208	0	0	1	0	1	241316853	242316853	0	0
	121	rs2293764	2	241816853	PDCD1	241849881	241858908	0	0	1	0	1	241316853	242316853	0	0
	121	rs2293764	2	241816853	RTP5	241869600	241873823	0	0	0	0	0	241316853	242316853	0	0
	122	rs7650482	3	12800305	CAND2	12796472	12871916	1	1	1	1	4	12300305	13300305	1	0
	122	rs7650482	3	12800305	PPARG	12287368	12434356	0	0	0	0	0	12300305	13300305	0	0
	122	rs7650482	3	12800305	TSEN2	12484432	12539623	0	0	0	0	0	12300305	13300305	0	0
	122	rs7650482	3	12800305	MKRN2OS	12514934	12561059	0	0	0	0	0	12300305	13300305	0	0
	122	rs7650482	3	12800305	MKRN2	12557014	12583713	0	0	0	0	0	12300305	13300305	0	0
	122	rs7650482	3	12800305	RAF1	12583601	12664226	0	0	0	0	0	12300305	13300305	0	0
	122	rs7650482	3	12800305	TMEM40	12733525	12769457	0	0	0	0	0	12300305	13300305	0	0
	122	rs7650482	3	12800305	RPL32	12834485	12841588	0	0	0	0	0	12300305	13300305	0	0
	122	rs7650482	3	12800305	IQSEC1	12901352	13073117	0	0	0	0	0	12300305	13300305	0	0
	123	rs79293030	3	26330633	LRRC3B	26622806	26710776	1	1	0	0	2	25830633	26830633	1	0
	124	rs80059929	3	44805230	KIF15	44761717	44873376	1	1	1	1	4	44305230	45305230	1	0
	124	rs80059929	3	44805230	TOPAZ1	44241886	44332098	0	0	0	0	0	44305230	45305230	0	0
	124	rs80059929	3	44805230	TCAIM	44338119	44409451	0	0	0	0	0	44305230	45305230	0	0
	124	rs80059929	3	44805230	ZNF445	44439770	44477670	0	0	0	0	0	44305230	45305230	0	0
	124	rs80059929	3	44805230	ZNF852	44498970	44510636	0	0	0	0	0	44305230	45305230	0	0
	124	rs80059929	3	44805230	ZKSCAN7	44555193	44583483	0	0	1	0	1	44305230	45305230	0	0
	124	rs80059929	3	44805230	ZNF660	44578223	44599694	0	0	0	0	0	44305230	45305230	0	0
	124	rs80059929	3	44805230	ZNF197	44584888	44648471	0	0	1	0	1	44305230	45305230	0	0
	124	rs80059929	3	44805230	ZNF35	44648727	44660791	0	0	1	0	1	44305230	45305230	0	0
	124	rs80059929	3	44805230	ZNF502	44712643	44723831	0	0	1	0	1	44305230	45305230	0	0
	124	rs80059929	3	44805230	ZNF501	44729596	44737083	0	0	1	0	1	44305230	45305230	0	0
	124	rs80059929	3	44805230	KIAA1143	44737661	44761662	0	0	1	0	1	44305230	45305230	0	0
	124	rs80059929	3	44805230	TMEM42	44861869	44865670	0	0	1	1	2	44305230	45305230	0	0
	124	rs80059929	3	44805230	TGM4	44874608	44914990	0	0	1	0	1	44305230	45305230	0	0
	124	rs80059929	3	44805230	ZDHHC3	44915257	44976185	0	0	0	0	0	44305230	45305230	0	0
	124	rs80059929	3	44805230	EXOSC7	44975241	45036066	0	0	0	0	0	44305230	45305230	0	0
	124	rs80059929	3	44805230	CLEC3B	45001548	45036071	0	0	0	0	0	44305230	45305230	0	0
	124	rs80059929	3	44805230	CDCP1	45082278	45146422	0	0	0	0	0	44305230	45305230	0	0
	124	rs80059929	3	44805230	TMEM158	45224466	45226278	0	0	0	0	0	44305230	45305230	0	0
	125	rs71325072	3	45573963	LIMD1	45555394	45686338	1	0	1	0	2	45073963	46073963	1	0
	125	rs71325072	3	45573963	CDCP1	45082278	45146422	0	0	0	0	0	45073963	46073963	0	0
	125	rs71325072	3	45573963	TMEM158	45224466	45226278	0	0	0	0	0	45073963	46073963	0	0
	125	rs71325072	3	45573963	LARS2	45388506	45549421	0	0	0	0	0	45073963	46073963	0	0
	125	rs71325072	3	45573963	SACM1L	45689056	45745424	0	0	0	0	0	45073963	46073963	0	0
	125	rs71325072	3	45573963	SLC6A20	45755450	45796535	0	0	0	0	0	45073963	46073963	0	0
	125	rs71325072	3	45573963	LZTFL1	45823316	45916042	0	0	0	0	0	45073963	46073963	0	0
	125	rs71325072	3	45573963	CCR9	45886504	45903175	0	0	0	0	0	45073963	46073963	0	0
	125	rs71325072	3	45573963	FYCO1	45917904	45995824	0	0	0	0	0	45073963	46073963	0	0
	125	rs71325072	3	45573963	CXCR6	45940933	45948353	0	0	0	0	0	45073963	46073963	0	0
	125	rs71325072	3	45573963	XCR1	46017024	46027742	0	0	0	0	0	45073963	46073963	0	0
	126	rs4283605	3	49641218	MST1	49683947	49689501	0	1	1	1	3	49141218	50141218	1	1
	126	rs4283605	3	49641218	CCDC71	49162535	49166321	0	0	1	0	1	49141218	50141218	0	1
	126	rs4283605	3	49641218	KLHDC8B	49171611	49176484	0	0	1	0	1	49141218	50141218	0	1
	126	rs4283605	3	49641218	CIMIP7	49177632	49191858	0	0	0	0	0	49141218	50141218	0	1
	126	rs4283605	3	49641218	IHO1	49198428	49258104	0	0	0	0	0	49141218	50141218	0	1
	126	rs4283605	3	49641218	C3orf62	49268602	49277909	0	0	0	0	0	49141218	50141218	0	1
	126	rs4283605	3	49641218	USP4	49277831	49340712	0	0	1	0	1	49141218	50141218	0	1
	126	rs4283605	3	49641218	GPX1	49357176	49358600	0	0	1	0	1	49141218	50141218	0	1
	126	rs4283605	3	49641218	RHOA	49359145	49412998	0	0	0	0	0	49141218	50141218	0	1
	126	rs4283605	3	49641218	TCTA	49412206	49416475	0	0	1	0	1	49141218	50141218	0	1
	126	rs4283605	3	49641218	AMT	49416778	49422753	0	0	1	0	1	49141218	50141218	0	1
	126	rs4283605	3	49641218	NICN1	49422946	49429326	0	0	1	0	1	49141218	50141218	0	1
	126	rs4283605	3	49641218	DAG1	49468713	49535615	0	0	1	0	1	49141218	50141218	0	1
	126	rs4283605	3	49641218	BSN	49554489	49671545	0	0	0	1	1	49141218	50141218	0	1
	126	rs4283605	3	49641218	APEH	49674002	49683963	1	0	1	0	2	49141218	50141218	0	1
	126	rs4283605	3	49641218	RNF123	49689499	49721529	0	0	1	0	1	49141218	50141218	0	1
	126	rs4283605	3	49641218	AMIGO3	49716834	49723916	0	0	0	0	0	49141218	50141218	0	1
	126	rs4283605	3	49641218	GMPPB	49716844	49723951	0	0	1	0	1	49141218	50141218	0	1
	126	rs4283605	3	49641218	IP6K1	49724294	49786542	0	0	1	0	1	49141218	50141218	0	1
	126	rs4283605	3	49641218	CDHR4	49790732	49799835	0	0	0	0	0	49141218	50141218	0	1
	126	rs4283605	3	49641218	INKA1	49803254	49805030	0	0	1	0	1	49141218	50141218	0	1
	126	rs4283605	3	49641218	UBA7	49805207	49813946	0	0	1	0	1	49141218	50141218	0	1
	126	rs4283605	3	49641218	TRAIP	49828601	49856574	0	0	0	0	0	49141218	50141218	0	1
	126	rs4283605	3	49641218	CAMKV	49857988	49870222	0	0	0	0	0	49141218	50141218	0	1
	126	rs4283605	3	49641218	MST1R	49887002	49903866	0	0	1	0	1	49141218	50141218	0	1
	126	rs4283605	3	49641218	MON1A	49908869	49930173	0	0	1	0	1	49141218	50141218	0	1
	126	rs4283605	3	49641218	RBM6	49940007	50100045	0	0	1	0	1	49141218	50141218	0	1
	126	rs4283605	3	49641218	RBM5	50088908	50119021	0	0	1	0	1	49141218	50141218	0	1
	127	rs3197999	3	49684099	MST1	49683947	49689501	1	1	1	1	4	49184099	50184099	1	0
	127	rs3197999	3	49684099	CIMIP7	49177632	49191858	0	0	0	0	0	49184099	50184099	0	0
	127	rs3197999	3	49684099	IHO1	49198428	49258104	0	0	0	0	0	49184099	50184099	0	0
	127	rs3197999	3	49684099	C3orf62	49268602	49277909	0	0	0	0	0	49184099	50184099	0	0
	127	rs3197999	3	49684099	USP4	49277831	49340712	0	0	1	0	1	49184099	50184099	0	0
	127	rs3197999	3	49684099	GPX1	49357176	49358600	0	0	1	0	1	49184099	50184099	0	0
	127	rs3197999	3	49684099	RHOA	49359145	49412998	0	0	1	0	1	49184099	50184099	0	0
	127	rs3197999	3	49684099	TCTA	49412206	49416475	0	0	1	0	1	49184099	50184099	0	0
	127	rs3197999	3	49684099	AMT	49416778	49422753	0	0	1	0	1	49184099	50184099	0	0
	127	rs3197999	3	49684099	NICN1	49422946	49429326	0	0	1	0	1	49184099	50184099	0	0
	127	rs3197999	3	49684099	DAG1	49468713	49535615	0	0	1	0	1	49184099	50184099	0	0
	127	rs3197999	3	49684099	BSN	49554489	49671545	0	0	0	1	1	49184099	50184099	0	0
	127	rs3197999	3	49684099	APEH	49674002	49683963	0	0	1	0	1	49184099	50184099	0	0
	127	rs3197999	3	49684099	RNF123	49689499	49721529	0	0	1	0	1	49184099	50184099	0	0
	127	rs3197999	3	49684099	AMIGO3	49716834	49723916	0	0	0	0	0	49184099	50184099	0	0
	127	rs3197999	3	49684099	GMPPB	49716844	49723951	0	0	1	0	1	49184099	50184099	0	0
	127	rs3197999	3	49684099	IP6K1	49724294	49786542	0	0	1	0	1	49184099	50184099	0	0
	127	rs3197999	3	49684099	CDHR4	49790732	49799835	0	0	1	0	1	49184099	50184099	0	0
	127	rs3197999	3	49684099	INKA1	49803254	49805030	0	0	1	0	1	49184099	50184099	0	0
	127	rs3197999	3	49684099	UBA7	49805207	49813946	0	0	1	0	1	49184099	50184099	0	0
	127	rs3197999	3	49684099	TRAIP	49828601	49856574	0	0	0	0	0	49184099	50184099	0	0
	127	rs3197999	3	49684099	CAMKV	49857988	49870222	0	0	1	0	1	49184099	50184099	0	0
	127	rs3197999	3	49684099	MST1R	49887002	49903866	0	0	1	0	1	49184099	50184099	0	0
	127	rs3197999	3	49684099	MON1A	49908869	49930173	0	0	1	0	1	49184099	50184099	0	0
	127	rs3197999	3	49684099	RBM6	49940007	50100045	0	0	1	0	1	49184099	50184099	0	0
	127	rs3197999	3	49684099	RBM5	50088908	50119021	0	0	1	0	1	49184099	50184099	0	0
	127	rs3197999	3	49684099	SEMA3F	50155045	50189075	0	0	1	0	1	49184099	50184099	0	0
	128	rs1075653	3	52791512	ITIH1	52777587	52792062	0	1	1	1	3	52291512	53291512	1	0
	128	rs1075653	3	52791512	GLYCTK	52287089	52295256	0	0	1	0	1	52291512	53291512	0	0
	128	rs1075653	3	52791512	DNAH1	52316319	52400491	0	0	1	0	1	52291512	53291512	0	0
	128	rs1075653	3	52791512	BAP1	52401013	52410350	0	0	0	0	0	52291512	53291512	0	0
	128	rs1075653	3	52791512	PHF7	52410657	52423641	0	0	0	0	0	52291512	53291512	0	0
	128	rs1075653	3	52791512	SEMA3G	52433053	52445085	0	0	0	0	0	52291512	53291512	0	0
	128	rs1075653	3	52791512	TNNC1	52451102	52454070	0	0	0	0	0	52291512	53291512	0	0
	128	rs1075653	3	52791512	NISCH	52455118	52493071	0	0	0	0	0	52291512	53291512	0	0
	128	rs1075653	3	52791512	STAB1	52495338	52524495	0	0	0	0	0	52291512	53291512	0	0
	128	rs1075653	3	52791512	NT5DC2	52524370	52535054	0	0	1	0	1	52291512	53291512	0	0
	128	rs1075653	3	52791512	UQCC5	52534013	52579237	0	0	0	0	0	52291512	53291512	0	0
	128	rs1075653	3	52791512	PBRM1	52545352	52685917	0	0	1	1	2	52291512	53291512	0	0
	128	rs1075653	3	52791512	GNL3	52681156	52694492	0	0	1	1	2	52291512	53291512	0	0
	128	rs1075653	3	52791512	GLT8D1	52694489	52706032	0	0	1	0	1	52291512	53291512	0	0
	128	rs1075653	3	52791512	SPCS1	52704955	52708166	0	0	1	0	1	52291512	53291512	0	0
	128	rs1075653	3	52791512	NEK4	52710784	52770949	0	0	1	1	2	52291512	53291512	0	0
	128	rs1075653	3	52791512	ITIH3	52794768	52809009	1	0	0	0	1	52291512	53291512	0	0
	128	rs1075653	3	52791512	ITIH4	52812975	52831479	0	0	0	0	0	52291512	53291512	0	0
	128	rs1075653	3	52791512	MUSTN1	52833114	52835219	0	0	1	0	1	52291512	53291512	0	0
	128	rs1075653	3	52791512	STIMATE	52836219	52897596	0	0	1	0	1	52291512	53291512	0	0
	128	rs1075653	3	52791512	SFMBT1	52903572	53046750	0	0	1	0	1	52291512	53291512	0	0
	128	rs1075653	3	52791512	RFT1	53088483	53130462	0	0	1	0	1	52291512	53291512	0	0
	128	rs1075653	3	52791512	PRKCD	53156009	53192717	0	0	0	0	0	52291512	53291512	0	0
	128	rs1075653	3	52791512	TKT	53224707	53256052	0	0	0	0	0	52291512	53291512	0	0
	129	rs7355798	3	58145788	FLNB	58008400	58172255	0	1	1	0	2	57645788	58645788	1	0
	129	rs7355798	3	58145788	DENND6A	57625457	57693089	0	0	0	0	0	57645788	58645788	0	0
	129	rs7355798	3	58145788	SLMAP	57755450	57929168	0	0	0	0	0	57645788	58645788	0	0
	129	rs7355798	3	58145788	DNASE1L3	58192257	58214697	1	0	1	0	2	57645788	58645788	0	0
	129	rs7355798	3	58145788	ABHD6	58237506	58295693	0	0	1	0	1	57645788	58645788	0	0
	129	rs7355798	3	58145788	RPP14	58306247	58324695	0	0	1	0	1	57645788	58645788	0	0
	129	rs7355798	3	58145788	HTD2	58317614	58318120	0	0	0	0	0	57645788	58645788	0	0
	129	rs7355798	3	58145788	PXK	58332880	58426021	0	0	1	0	1	57645788	58645788	0	0
	129	rs7355798	3	58145788	PDHB	58427630	58433857	0	0	1	0	1	57645788	58645788	0	0
	129	rs7355798	3	58145788	KCTD6	58492114	58502360	0	0	1	0	1	57645788	58645788	0	0
	129	rs7355798	3	58145788	ACOX2	58505136	58537319	0	0	1	0	1	57645788	58645788	0	0
	129	rs7355798	3	58145788	FAM107A	58564117	58627610	0	0	0	0	0	57645788	58645788	0	0
	129	rs7355798	3	58145788	FAM3D	58633946	58666848	0	0	0	0	0	57645788	58645788	0	0
	130	rs6771875	3	61658693	PTPRG	61561569	62247900	1	1	0	0	2	61158693	62158693	1	0
	131	rs11719972	3	71545686	FOXP1	70954693	71583989	1	1	0	0	2	71045686	72045686	1	1
	131	rs11719972	3	71545686	EIF4E3	71675416	71754773	0	0	0	0	0	71045686	72045686	0	1
	131	rs11719972	3	71545686	GPR27	71754050	71756496	0	0	0	0	0	71045686	72045686	0	1
	131	rs11719972	3	71545686	PROK2	71771656	71785206	0	0	0	0	0	71045686	72045686	0	1
	132	rs9858679	3	86695486	VGLL3	86937969	86991119	1	1	1	0	3	86195486	87195486	1	0
	133	rs9884090	3	119397303	TIMMDC1	119498532	119525090	0	1	1	1	3	118897303	119897303	1	0
	133	rs9884090	3	119397303	IGSF11	118900557	119146068	0	0	0	0	0	118897303	119897303	0	0
	133	rs9884090	3	119397303	TEX55	119146150	119160042	0	0	0	0	0	118897303	119897303	0	0
	133	rs9884090	3	119397303	UPK1B	119173517	119205153	0	0	0	0	0	118897303	119897303	0	0
	133	rs9884090	3	119397303	B4GALT4	119211732	119241103	0	0	0	0	0	118897303	119897303	0	0
	133	rs9884090	3	119397303	ARHGAP31	119294373	119420714	0	0	0	1	1	118897303	119897303	0	0
	133	rs9884090	3	119397303	TMEM39A	119429500	119468830	1	0	1	1	3	118897303	119897303	0	0
	133	rs9884090	3	119397303	POGLUT1	119468938	119494708	0	0	0	0	0	118897303	119897303	0	0
	133	rs9884090	3	119397303	CD80	119524293	119559602	0	0	0	0	0	118897303	119897303	0	0
	133	rs9884090	3	119397303	ADPRH	119579268	119589945	0	0	0	0	0	118897303	119897303	0	0
	133	rs9884090	3	119397303	PLA1A	119597842	119629811	0	0	0	0	0	118897303	119897303	0	0
	133	rs9884090	3	119397303	POPDC2	119636457	119665324	0	0	0	0	0	118897303	119897303	0	0
	133	rs9884090	3	119397303	COX17	119654513	119677454	0	0	0	0	0	118897303	119897303	0	0
	133	rs9884090	3	119397303	CFAP91	119703022	119767102	0	0	0	0	0	118897303	119897303	0	0
	133	rs9884090	3	119397303	NR1I2	119780484	119818485	0	0	0	0	0	118897303	119897303	0	0
	133	rs9884090	3	119397303	GSK3B	119821323	120094417	0	0	0	0	0	118897303	119897303	0	0
	134	rs150512726	3	124763647	ITGB5	124761948	124901418	0	1	1	0	2	124263647	125263647	1	0
	134	rs150512726	3	124763647	KALRN	124080023	124726325	0	0	1	0	1	124263647	125263647	0	0
	134	rs150512726	3	124763647	UMPS	124730366	124745193	1	0	1	0	2	124263647	125263647	0	0
	134	rs150512726	3	124763647	MUC13	124927862	124953819	0	0	0	0	0	124263647	125263647	0	0
	134	rs150512726	3	124763647	HEG1	124965710	125055958	0	0	0	0	0	124263647	125263647	0	0
	134	rs150512726	3	124763647	SLC12A8	125082636	125279177	0	0	0	0	0	124263647	125263647	0	0
	134	rs150512726	3	124763647	ZNF148	125225561	125375354	0	0	0	0	0	124263647	125263647	0	0
	135	rs3774769	3	129493428	IFT122	129440125	129520355	0	1	1	0	2	128993428	129993428	1	0
	135	rs3774769	3	129493428	CFAP92	128909866	129002690	0	0	0	0	0	128993428	129993428	0	0
	135	rs3774769	3	129493428	EFCC1	129001629	129040742	0	0	0	0	0	128993428	129993428	0	0
	135	rs3774769	3	129493428	GP9	129060767	129062406	0	0	0	0	0	128993428	129993428	0	0
	135	rs3774769	3	129493428	RAB43	129087569	129122801	0	0	0	0	0	128993428	129993428	0	0
	135	rs3774769	3	129493428	ISY1	129127415	129161293	0	0	0	0	0	128993428	129993428	0	0
	135	rs3774769	3	129493428	CNBP	129169484	129183922	0	0	0	0	0	128993428	129993428	0	0
	135	rs3774769	3	129493428	COPG1	129249606	129277771	0	0	0	0	0	128993428	129993428	0	0
	135	rs3774769	3	129493428	HMCES	129278828	129306186	0	0	0	0	0	128993428	129993428	0	0
	135	rs3774769	3	129493428	H1-10	129314772	129316277	0	0	0	0	0	128993428	129993428	0	0
	135	rs3774769	3	129493428	EFCAB12	129401321	129428651	0	0	1	0	1	128993428	129993428	0	0
	135	rs3774769	3	129493428	MBD4	129430944	129440035	0	0	0	0	0	128993428	129993428	0	0
	135	rs3774769	3	129493428	RHO	129528640	129535169	1	0	0	0	1	128993428	129993428	0	0
	135	rs3774769	3	129493428	H1-8	129543214	129551467	0	0	0	0	0	128993428	129993428	0	0
	135	rs3774769	3	129493428	PLXND1	129555175	129606818	0	0	1	0	1	128993428	129993428	0	0
	135	rs3774769	3	129493428	TMCC1	129647792	129893576	0	0	0	0	0	128993428	129993428	0	0
	135	rs3774769	3	129493428	TRH	129974305	129977938	0	0	0	0	0	128993428	129993428	0	0
	136	rs13097267	3	136015323	PPP2R3A	135965673	136147891	1	1	0	0	2	135515323	136515323	1	0
	136	rs13097267	3	136015323	MSL2	136148922	136197241	0	0	0	0	0	135515323	136515323	0	0
	136	rs13097267	3	136015323	PCCB	136250306	136337896	0	0	0	0	0	135515323	136515323	0	0
	136	rs13097267	3	136015323	STAG1	136336235	136752378	0	0	0	0	0	135515323	136515323	0	0
	137	rs1394094	3	136476945	PCCB	136250306	136337896	1	1	1	0	3	135976945	136976945	1	0
	137	rs1394094	3	136476945	PPP2R3A	135965673	136147891	0	0	1	0	1	135976945	136976945	0	0
	137	rs1394094	3	136476945	MSL2	136148922	136197241	0	0	0	0	0	135976945	136976945	0	0
	137	rs1394094	3	136476945	STAG1	136336235	136752378	0	0	0	0	0	135976945	136976945	0	0
	137	rs1394094	3	136476945	SLC35G2	136818647	136855892	0	0	1	0	1	135976945	136976945	0	0
	137	rs1394094	3	136476945	NCK1	136862208	136949823	0	0	1	0	1	135976945	136976945	0	0
	137	rs1394094	3	136476945	IL20RB	136946230	137011085	0	0	1	0	1	135976945	136976945	0	0
	138	rs2871960	3	141402972	ZBTB38	141324213	141449792	1	1	1	0	3	140902972	141902972	1	0
	138	rs2871960	3	141402972	SLC25A36	140941830	140979933	0	0	0	0	0	140902972	141902972	0	0
	138	rs2871960	3	141402972	SPSB4	141051402	141148611	0	0	0	0	0	140902972	141902972	0	0
	138	rs2871960	3	141402972	PXYLP1	141228726	141294906	0	0	0	0	0	140902972	141902972	0	0
	138	rs2871960	3	141402972	RASA2	141487047	141615342	0	0	0	0	0	140902972	141902972	0	0
	138	rs2871960	3	141402972	RNF7	141738204	141747560	0	0	0	0	0	140902972	141902972	0	0
	138	rs2871960	3	141402972	GRK7	141778148	141818490	0	0	0	0	0	140902972	141902972	0	0
	138	rs2871960	3	141402972	ATP1B3	141876124	141926514	0	0	0	0	0	140902972	141902972	0	0
	139	rs1827182	3	152318513	MBNL1	152243828	152465780	1	1	1	0	3	151818513	152818513	1	0
	139	rs1827182	3	152318513	AADAC	151814037	151828488	0	0	0	0	0	151818513	152818513	0	0
	139	rs1827182	3	152318513	SUCNR1	151873643	151884617	0	0	0	0	0	151818513	152818513	0	0
	139	rs1827182	3	152318513	TMEM14EP	152339695	152340990	0	0	0	0	0	151818513	152818513	0	0
	140	rs377565	3	154204164	ARHGEF26	154121003	154257827	1	0	1	1	3	153704164	154704164	1	0
	140	rs377565	3	154204164	DHX36	154272546	154324497	0	1	1	0	2	153704164	154704164	0	0
	140	rs377565	3	154204164	GPR149	154337672	154429715	0	0	0	0	0	153704164	154704164	0	0
	141	rs589446	3	160015740	IL12A	159988750	159996019	1	1	1	0	3	159515740	160515740	1	0
	141	rs589446	3	160015740	SCHIP1	159839861	159897360	0	0	1	0	1	159515740	160515740	0	0
	141	rs589446	3	160015740	C3orf80	160225636	160228212	0	0	0	0	0	159515740	160515740	0	0
	141	rs589446	3	160015740	IFT80	160256986	160399880	0	0	1	0	1	159515740	160515740	0	0
	141	rs589446	3	160015740	SMC4	160399274	160434962	0	0	1	0	1	159515740	160515740	0	0
	141	rs589446	3	160015740	TRIM59	160432445	160485773	0	0	1	0	1	159515740	160515740	0	0
	141	rs589446	3	160015740	KPNA4	160494995	160565588	0	0	0	0	0	159515740	160515740	0	0
	142	rs56394279	3	160453304	SMC4	160399274	160434962	0	1	1	0	2	159953304	160953304	1	0
	142	rs56394279	3	160453304	IL12A	159988750	159996019	0	0	0	0	0	159953304	160953304	0	0
	142	rs56394279	3	160453304	C3orf80	160225636	160228212	0	0	0	0	0	159953304	160953304	0	0
	142	rs56394279	3	160453304	IFT80	160256986	160399880	0	0	1	0	1	159953304	160953304	0	0
	142	rs56394279	3	160453304	TRIM59	160432445	160485773	1	0	1	0	2	159953304	160953304	0	0
	142	rs56394279	3	160453304	KPNA4	160494995	160565588	0	0	1	0	1	159953304	160953304	0	0
	142	rs56394279	3	160453304	ARL14	160677160	160678445	0	0	0	0	0	159953304	160953304	0	0
	142	rs56394279	3	160453304	PPM1L	160755602	161078907	0	0	0	0	0	159953304	160953304	0	0
	143	rs34847803	3	169774228	MYNN	169772831	169789716	1	0	1	0	2	169274228	170274228	1	0
	143	rs34847803	3	169774228	MECOM	169083499	169663618	0	0	0	0	0	169274228	170274228	0	0
	143	rs34847803	3	169774228	ACTRT3	169766921	169769895	0	1	0	0	1	169274228	170274228	0	0
	143	rs34847803	3	169774228	LRRC34	169793428	169812986	0	0	0	0	0	169274228	170274228	0	0
	143	rs34847803	3	169774228	LRRIQ4	169821922	169837775	0	0	0	0	0	169274228	170274228	0	0
	143	rs34847803	3	169774228	LRRC31	169839179	169869930	0	0	0	0	0	169274228	170274228	0	0
	143	rs34847803	3	169774228	SAMD7	169911572	169939175	0	0	0	0	0	169274228	170274228	0	0
	143	rs34847803	3	169774228	SEC62	169966635	169998373	0	0	0	0	0	169274228	170274228	0	0
	143	rs34847803	3	169774228	GPR160	170037929	170085403	0	0	0	0	0	169274228	170274228	0	0
	143	rs34847803	3	169774228	PHC3	170086732	170181749	0	0	0	0	0	169274228	170274228	0	0
	143	rs34847803	3	169774228	PRKCI	170222365	170305981	0	0	0	0	0	169274228	170274228	0	0
	144	rs7630096	3	183481729	MCF2L2	183178043	183428778	1	0	1	0	2	182981729	183981729	1	0
	144	rs7630096	3	183481729	DCUN1D1	182938074	182985953	0	0	0	0	0	182981729	183981729	0	0
	144	rs7630096	3	183481729	MCCC1	183015218	183116075	0	0	0	0	0	182981729	183981729	0	0
	144	rs7630096	3	183481729	LAMP3	183122213	183163839	0	0	0	0	0	182981729	183981729	0	0
	144	rs7630096	3	183481729	B3GNT5	183253244	183298504	0	0	0	0	0	182981729	183981729	0	0
	144	rs7630096	3	183481729	KLHL6	183487531	183555689	0	1	0	0	1	182981729	183981729	0	0
	144	rs7630096	3	183481729	KLHL24	183635568	183684477	0	0	0	0	0	182981729	183981729	0	0
	144	rs7630096	3	183481729	YEATS2	183697818	183812625	0	0	0	0	0	182981729	183981729	0	0
	144	rs7630096	3	183481729	MAP6D1	183815876	183825594	0	0	0	0	0	182981729	183981729	0	0
	144	rs7630096	3	183481729	PARL	183829385	183884933	0	0	0	0	0	182981729	183981729	0	0
	144	rs7630096	3	183481729	ABCC5	183919934	184018015	0	0	0	0	0	182981729	183981729	0	0
	145	rs10440056	3	186716033	KNG1	186717276	186743954	1	1	1	0	3	186216033	187216033	1	0
	145	rs10440056	3	186716033	DGKG	186105668	186362237	0	0	0	0	0	186216033	187216033	0	0
	145	rs10440056	3	186716033	CRYGS	186538441	186546702	0	0	0	0	0	186216033	187216033	0	0
	145	rs10440056	3	186716033	TBCCD1	186546073	186570543	0	0	0	0	0	186216033	187216033	0	0
	145	rs10440056	3	186716033	DNAJB11	186567403	186597272	0	0	0	0	0	186216033	187216033	0	0
	145	rs10440056	3	186716033	AHSG	186612923	186621318	0	0	0	0	0	186216033	187216033	0	0
	145	rs10440056	3	186716033	FETUB	186635969	186653141	0	0	0	0	0	186216033	187216033	0	0
	145	rs10440056	3	186716033	HRG	186660216	186678240	0	0	0	0	0	186216033	187216033	0	0
	145	rs10440056	3	186716033	EIF4A2	186783205	186789900	0	0	0	0	0	186216033	187216033	0	0
	145	rs10440056	3	186716033	RFC4	186789880	186807058	0	0	0	0	0	186216033	187216033	0	0
	145	rs10440056	3	186716033	ADIPOQ	186842674	186858463	0	0	0	0	0	186216033	187216033	0	0
	145	rs10440056	3	186716033	ST6GAL1	186941376	187078553	0	0	0	0	0	186216033	187216033	0	0
	145	rs10440056	3	186716033	RPL39L	187120948	187180908	0	0	0	0	0	186216033	187216033	0	0
	145	rs10440056	3	186716033	RTP1	187197486	187201465	0	0	0	0	0	186216033	187216033	0	0
	146	rs6762648	3	188683070	TPRG1	188947214	189325304	1	1	0	0	2	188183070	189183070	1	0
	146	rs6762648	3	188683070	LPP	188153284	188884292	0	0	0	0	0	188183070	189183070	0	0
	147	rs56098053	3	188767039	TPRG1	188947214	189325304	1	1	0	0	2	188267039	189267039	1	0
	147	rs56098053	3	188767039	LPP	188153284	188884292	0	0	0	0	0	188267039	189267039	0	0
	148	rs7642977	3	194092961	HES1	194136145	194138732	1	1	0	0	2	193592961	194592961	1	0
	148	rs7642977	3	194092961	ATP13A4	193402077	193593111	0	0	0	0	0	193592961	194592961	0	0
	148	rs7642977	3	194092961	OPA1	193593144	193697823	0	0	0	0	0	193592961	194592961	0	0
	148	rs7642977	3	194092961	CPN2	194339765	194351328	0	0	0	0	0	193592961	194592961	0	0
	148	rs7642977	3	194092961	LRRC15	194355247	194369743	0	0	0	0	0	193592961	194592961	0	0
	148	rs7642977	3	194092961	GP5	194394821	194399266	0	0	0	0	0	193592961	194592961	0	0
	148	rs7642977	3	194092961	ATP13A3	194402672	194498364	0	0	0	0	0	193592961	194592961	0	0
	148	rs7642977	3	194092961	TMEM44	194587673	194633689	0	0	0	0	0	193592961	194592961	0	0
	149	rs75391517	3	196688484	ZDHHC19	196197449	196211437	0	0	0	0	0	196188484	197188484	0	0
	149	rs75391517	3	196688484	SLC51A	196211487	196243178	0	0	0	0	0	196188484	197188484	0	0
	149	rs75391517	3	196688484	PCYT1A	196214222	196287957	0	0	0	0	0	196188484	197188484	0	0
	149	rs75391517	3	196688484	DYNLT2B	196291219	196318299	0	0	0	0	0	196188484	197188484	0	0
	149	rs75391517	3	196688484	TM4SF19-DYNLT2B	196316082	196338373	0	0	0	0	0	196188484	197188484	0	0
	149	rs75391517	3	196688484	TM4SF19	196319342	196338503	0	0	0	0	0	196188484	197188484	0	0
	149	rs75391517	3	196688484	UBXN7	196347662	196432474	0	0	0	0	0	196188484	197188484	0	0
	149	rs75391517	3	196688484	RNF168	196468783	196503768	0	0	0	0	0	196188484	197188484	0	0
	149	rs75391517	3	196688484	SMCO1	196506877	196515366	0	0	0	0	0	196188484	197188484	0	0
	149	rs75391517	3	196688484	WDR53	196554185	196568674	0	0	0	0	0	196188484	197188484	0	0
	149	rs75391517	3	196688484	FBXO45	196568611	196589059	0	0	0	0	0	196188484	197188484	0	0
	149	rs75391517	3	196688484	NRROS	196639686	196662004	0	0	0	0	0	196188484	197188484	0	0
	149	rs75391517	3	196688484	PIGX	196639775	196736007	0	0	1	0	1	196188484	197188484	0	0
	149	rs75391517	3	196688484	CEP19	196706277	196712293	0	0	1	0	1	196188484	197188484	0	0
	149	rs75391517	3	196688484	PAK2	196739857	196832647	0	0	0	0	0	196188484	197188484	0	0
	149	rs75391517	3	196688484	SENP5	196867856	196934714	0	0	0	0	0	196188484	197188484	0	0
	149	rs75391517	3	196688484	NCBP2	196935402	196942597	0	0	0	0	0	196188484	197188484	0	0
	149	rs75391517	3	196688484	PIGZ	196946343	196969060	0	0	0	0	0	196188484	197188484	0	0
	149	rs75391517	3	196688484	MELTF	196988621	197029816	0	0	0	0	0	196188484	197188484	0	0
	149	rs75391517	3	196688484	DLG1	197042560	197299300	0	0	0	0	0	196188484	197188484	0	0
	150	rs558992709	3	197814267	LRCH3	197791226	197888436	1	1	0	0	2	197314267	198314267	1	0
	150	rs558992709	3	197814267	BDH1	197509783	197573323	0	0	0	0	0	197314267	198314267	0	0
	150	rs558992709	3	197814267	RUBCN	197671393	197749727	0	0	0	0	0	197314267	198314267	0	0
	150	rs558992709	3	197814267	FYTTD1	197737179	197787596	0	0	0	0	0	197314267	198314267	0	0
	150	rs558992709	3	197814267	IQCG	197889075	197960142	0	0	0	0	0	197314267	198314267	0	0
	150	rs558992709	3	197814267	RPL35A	197949987	197956610	0	0	0	0	0	197314267	198314267	0	0
	150	rs558992709	3	197814267	LMLN	197960200	198043720	0	0	0	0	0	197314267	198314267	0	0
	151	rs11724804	4	971991	IDUA	986997	1004528	0	1	1	1	3	471991	1471991	1	0
	151	rs11724804	4	971991	ZNF721	425815	499156	0	0	0	0	0	471991	1471991	0	0
	151	rs11724804	4	971991	PIGG	499200	540196	0	0	0	0	0	471991	1471991	0	0
	151	rs11724804	4	971991	PDE6B	625584	670782	0	0	0	0	0	471991	1471991	0	0
	151	rs11724804	4	971991	ATP5ME	672436	674338	0	0	0	0	0	471991	1471991	0	0
	151	rs11724804	4	971991	MYL5	673580	682033	0	0	0	0	0	471991	1471991	0	0
	151	rs11724804	4	971991	SLC49A3	681829	689441	0	0	0	0	0	471991	1471991	0	0
	151	rs11724804	4	971991	PCGF3	705748	738271	0	0	0	0	0	471991	1471991	0	0
	151	rs11724804	4	971991	CPLX1	784957	826198	0	0	0	0	0	471991	1471991	0	0
	151	rs11724804	4	971991	GAK	849276	932373	0	0	0	0	0	471991	1471991	0	0
	151	rs11724804	4	971991	TMEM175	932387	958656	0	0	0	0	0	471991	1471991	0	0
	151	rs11724804	4	971991	DGKQ	958887	986895	1	0	1	0	2	471991	1471991	0	0
	151	rs11724804	4	971991	SLC26A1	979073	993440	0	0	1	1	2	471991	1471991	0	0
	151	rs11724804	4	971991	FGFRL1	1009936	1026897	0	0	1	0	1	471991	1471991	0	0
	151	rs11724804	4	971991	RNF212	1056250	1113562	0	0	0	0	0	471991	1471991	0	0
	151	rs11724804	4	971991	SPON2	1166932	1208962	0	0	0	0	0	471991	1471991	0	0
	151	rs11724804	4	971991	CTBP1	1211448	1249953	0	0	0	0	0	471991	1471991	0	0
	151	rs11724804	4	971991	MAEA	1289851	1340147	0	0	0	0	0	471991	1471991	0	0
	151	rs11724804	4	971991	UVSSA	1347266	1388049	0	0	0	0	0	471991	1471991	0	0
	151	rs11724804	4	971991	NKX1-1	1402932	1406331	0	0	0	0	0	471991	1471991	0	0
	152	rs55844411	4	7913825	AFAP1	7758714	7939926	1	1	1	0	3	7413825	8413825	1	1
	152	rs55844411	4	7913825	SORCS2	7192538	7742827	0	0	0	0	0	7413825	8413825	0	1
	152	rs55844411	4	7913825	PSAPL1	7430295	7434973	0	0	0	0	0	7413825	8413825	0	1
	152	rs55844411	4	7913825	ABLIM2	7965312	8158832	0	0	0	0	0	7413825	8413825	0	1
	152	rs55844411	4	7913825	SH3TC1	8182072	8241803	0	0	0	0	0	7413825	8413825	0	1
	152	rs55844411	4	7913825	HTRA3	8269765	8307111	0	0	1	0	1	7413825	8413825	0	1
	152	rs55844411	4	7913825	ACOX3	8366282	8440723	0	0	0	0	0	7413825	8413825	0	1
	153	rs1474313	4	8327339	HTRA3	8269765	8307111	1	0	1	0	2	7827339	8827339	1	0
	153	rs1474313	4	8327339	AFAP1	7758714	7939926	0	0	0	0	0	7827339	8827339	0	0
	153	rs1474313	4	8327339	ABLIM2	7965312	8158832	0	0	0	0	0	7827339	8827339	0	0
	153	rs1474313	4	8327339	SH3TC1	8182072	8241803	0	0	0	0	0	7827339	8827339	0	0
	153	rs1474313	4	8327339	ACOX3	8366282	8440723	0	1	0	0	1	7827339	8827339	0	0
	153	rs1474313	4	8327339	TRMT44	8436140	8493531	0	0	0	0	0	7827339	8827339	0	0
	153	rs1474313	4	8327339	GPR78	8558725	8619759	0	0	0	0	0	7827339	8827339	0	0
	153	rs1474313	4	8327339	CPZ	8592660	8619761	0	0	0	0	0	7827339	8827339	0	0
	154	rs66525731	4	13221803	RAB28	13361354	13484365	1	1	0	0	2	12721803	13721803	1	0
	154	rs66525731	4	13221803	NKX3-2	13540830	13545050	0	0	0	0	0	12721803	13721803	0	0
	154	rs66525731	4	13221803	BOD1L1	13568738	13627723	0	0	0	0	0	12721803	13721803	0	0
	155	rs9790578	4	26032408	RBPJ	26163455	26434919	1	1	0	0	2	25532408	26532408	1	0
	155	rs9790578	4	26032408	SLC34A2	25655301	25678748	0	0	0	0	0	25532408	26532408	0	0
	155	rs9790578	4	26032408	SEL1L3	25747433	25863760	0	0	0	0	0	25532408	26532408	0	0
	155	rs9790578	4	26032408	SMIM20	25861830	25929813	0	0	0	0	0	25532408	26532408	0	0
	155	rs9790578	4	26032408	CCKAR	26481400	26490462	0	0	0	0	0	25532408	26532408	0	0
	156	rs6831206	4	38358992	KLF3	38664196	38701042	1	1	0	0	2	37858992	38858992	1	0
	156	rs6831206	4	38358992	PGM2	37840875	37862937	0	0	0	0	0	37858992	38858992	0	0
	156	rs6831206	4	38358992	TBC1D1	37891087	38139175	0	0	0	0	0	37858992	38858992	0	0
	156	rs6831206	4	38358992	PTTG2	37960435	37961125	0	0	0	0	0	37858992	38858992	0	0
	156	rs6831206	4	38358992	TLR10	38772239	38782990	0	0	0	0	0	37858992	38858992	0	0
	156	rs6831206	4	38358992	TLR1	38790677	38856817	0	0	0	0	0	37858992	38858992	0	0
	156	rs6831206	4	38358992	TLR6	38823715	38856817	0	0	0	0	0	37858992	38858992	0	0
	157	rs71643295	4	39445984	TMEM156	38968806	39032922	0	0	0	0	0	38945984	39945984	0	0
	157	rs71643295	4	39445984	KLHL5	39045039	39126857	0	0	0	0	0	38945984	39945984	0	0
	157	rs71643295	4	39445984	WDR19	39182404	39285810	0	0	0	0	0	38945984	39945984	0	0
	157	rs71643295	4	39445984	RFC1	39287456	39366375	0	0	0	0	0	38945984	39945984	0	0
	157	rs71643295	4	39445984	KLB	39406853	39451536	0	0	0	0	0	38945984	39945984	0	0
	157	rs71643295	4	39445984	RPL9	39454124	39458948	1	0	0	0	1	38945984	39945984	0	0
	157	rs71643295	4	39445984	LIAS	39459000	39477653	0	1	0	0	1	38945984	39945984	0	0
	157	rs71643295	4	39445984	UGDH	39498755	39528311	0	0	0	0	0	38945984	39945984	0	0
	157	rs71643295	4	39445984	SMIM14	39546330	39639090	0	0	0	0	0	38945984	39945984	0	0
	157	rs71643295	4	39445984	UBE2K	39698044	39782792	0	0	0	0	0	38945984	39945984	0	0
	157	rs71643295	4	39445984	PDS5A	39822863	39977956	0	0	0	0	0	38945984	39945984	0	0
	158	rs17083205	4	53617981	LNX1	53459301	53701405	1	1	1	0	3	53117981	54117981	1	0
	158	rs17083205	4	53617981	SCFD2	52872982	53366075	0	0	1	0	1	53117981	54117981	0	0
	158	rs17083205	4	53617981	FIP1L1	53377643	54295272	0	0	0	0	0	53117981	54117981	0	0
	158	rs17083205	4	53617981	CHIC2	54009789	54064690	0	0	0	0	0	53117981	54117981	0	0
	158	rs17083205	4	53617981	GSX2	54099523	54102505	0	0	0	0	0	53117981	54117981	0	0
	159	rs7659911	4	55076156	KDR	55078477	55125589	1	1	1	0	3	54576156	55576156	1	0
	159	rs7659911	4	55076156	KIT	54660015	54740715	0	0	0	0	0	54576156	55576156	0	0
	159	rs7659911	4	55076156	SRD5A3	55346109	55373096	0	0	0	0	0	54576156	55576156	0	0
	159	rs7659911	4	55076156	TMEM165	55395957	55453397	0	0	0	0	0	54576156	55576156	0	0
	159	rs7659911	4	55076156	CLOCK	55427903	55547138	0	0	0	0	0	54576156	55576156	0	0
	159	rs7659911	4	55076156	PDCL2	55556525	55592212	0	0	0	0	0	54576156	55576156	0	0
	160	rs13125101	4	80253438	FGF5	80266599	80336680	1	1	0	0	2	79753438	80753438	1	0
	160	rs13125101	4	80253438	ANTXR2	79901149	80125454	0	0	0	0	0	79753438	80753438	0	0
	160	rs13125101	4	80253438	PRDM8	80183879	80204329	0	0	1	0	1	79753438	80753438	0	0
	160	rs13125101	4	80253438	CFAP299	80335720	80963756	0	0	0	0	0	79753438	80753438	0	0
	161	rs13139418	4	87296626	HSD17B13	87303789	87322906	1	1	1	0	3	86796626	87796626	1	0
	161	rs13139418	4	87296626	PTPN13	86594315	86815171	0	0	1	0	1	86796626	87796626	0	0
	161	rs13139418	4	87296626	SLC10A6	86823468	86849263	0	0	1	0	1	86796626	87796626	0	0
	161	rs13139418	4	87296626	C4orf36	86876205	86919726	0	0	1	0	1	86796626	87796626	0	0
	161	rs13139418	4	87296626	AFF1	86935002	87141054	0	0	1	0	1	86796626	87796626	0	0
	161	rs13139418	4	87296626	KLHL8	87160103	87240314	0	0	1	0	1	86796626	87796626	0	0
	161	rs13139418	4	87296626	HSD17B11	87336610	87391386	0	0	1	0	1	86796626	87796626	0	0
	161	rs13139418	4	87296626	NUDT9	87422582	87459454	0	0	1	0	1	86796626	87796626	0	0
	161	rs13139418	4	87296626	SPARCL1	87473335	87531061	0	0	1	0	1	86796626	87796626	0	0
	161	rs13139418	4	87296626	DSPP	87608529	87616910	0	0	0	0	0	86796626	87796626	0	0
	161	rs13139418	4	87296626	DMP1	87650307	87664361	0	0	0	0	0	86796626	87796626	0	0
	162	rs1585258	4	88958045	FAM13A	88725955	89111398	1	1	1	0	3	88458045	89458045	1	0
	162	rs1585258	4	88958045	HERC5	88457117	88506163	0	0	0	0	0	88458045	89458045	0	0
	162	rs1585258	4	88958045	PYURF	88520985	88523813	0	0	0	0	0	88458045	89458045	0	0
	162	rs1585258	4	88958045	HERC3	88521048	88708542	0	0	0	0	0	88458045	89458045	0	0
	162	rs1585258	4	88958045	PIGY	88521573	88521789	0	0	0	0	0	88458045	89458045	0	0
	162	rs1585258	4	88958045	NAP1L5	88695915	88698235	0	0	0	0	0	88458045	89458045	0	0
	162	rs1585258	4	88958045	TIGD2	89112817	89114899	0	0	1	0	1	88458045	89458045	0	0
	162	rs1585258	4	88958045	GPRIN3	89236386	89308010	0	0	0	0	0	88458045	89458045	0	0
	163	rs10006744	4	89023238	FAM13A	88725955	89111398	1	1	0	0	2	88523238	89523238	1	0
	163	rs10006744	4	89023238	PYURF	88520985	88523813	0	0	0	0	0	88523238	89523238	0	0
	163	rs10006744	4	89023238	HERC3	88521048	88708542	0	0	0	0	0	88523238	89523238	0	0
	163	rs10006744	4	89023238	NAP1L5	88695915	88698235	0	0	1	0	1	88523238	89523238	0	0
	163	rs10006744	4	89023238	TIGD2	89112817	89114899	0	0	1	0	1	88523238	89523238	0	0
	163	rs10006744	4	89023238	GPRIN3	89236386	89308010	0	0	0	0	0	88523238	89523238	0	0
	164	rs28502775	4	94480794	PDLIM5	94451886	94668226	1	1	1	0	3	93980794	94980794	1	0
	164	rs28502775	4	94480794	SMARCAD1	94207611	94291292	0	0	1	0	1	93980794	94980794	0	0
	164	rs28502775	4	94480794	HPGDS	94298535	94342876	0	0	0	0	0	93980794	94980794	0	0
	164	rs28502775	4	94480794	BMPR1B	94757968	95158448	0	0	1	0	1	93980794	94980794	0	0
	165	rs7689584	4	99526964	MTTP	99563761	99623999	0	1	1	1	3	99026964	100026964	1	0
	165	rs7689584	4	99526964	METAP1	98995620	99062813	0	0	1	0	1	99026964	100026964	0	0
	165	rs7689584	4	99526964	ADH5	99070981	99088801	0	0	1	0	1	99026964	100026964	0	0
	165	rs7689584	4	99526964	ADH4	99123657	99146407	0	0	0	0	0	99026964	100026964	0	0
	165	rs7689584	4	99526964	ADH6	99202638	99219537	0	0	0	0	0	99026964	100026964	0	0
	165	rs7689584	4	99526964	ADH1A	99276367	99291028	0	0	0	0	0	99026964	100026964	0	0
	165	rs7689584	4	99526964	ADH1B	99304964	99321401	0	0	1	0	1	99026964	100026964	0	0
	165	rs7689584	4	99526964	ADH7	99412261	99435737	0	0	0	0	0	99026964	100026964	0	0
	165	rs7689584	4	99526964	C4orf17	99511004	99542303	1	0	0	0	1	99026964	100026964	0	0
	165	rs7689584	4	99526964	TRMT10A	99546709	99564032	0	0	1	0	1	99026964	100026964	0	0
	165	rs7689584	4	99526964	DAPP1	99816833	99870154	0	0	0	0	0	99026964	100026964	0	0
	165	rs7689584	4	99526964	LAMTOR3	99878336	99894490	0	0	0	0	0	99026964	100026964	0	0
	165	rs7689584	4	99526964	DNAJB14	99896248	99946726	0	0	0	0	0	99026964	100026964	0	0
	165	rs7689584	4	99526964	H2AZ1	99948086	99950388	0	0	0	0	0	99026964	100026964	0	0
	166	rs201081507	4	101759884	PPP3CA	101023409	101348278	0	0	0	0	0	101767552	102767552	0	1
	166	rs201081507	4	101759884	BANK1	101411286	102074812	1	1	0	0	2	101767552	102767552	0	1
	166	rs201081507	4	101759884	SLC39A8	102251041	102431258	0	0	0	1	1	101767552	102767552	0	1
	166	rs13107325	4	102267552	SLC39A8	102251041	102431258	1	1	0	1	3	101767552	102767552	1	1
	166	rs13107325	4	102267552	BANK1	101411286	102074812	0	0	0	0	0	101767552	102767552	0	1
	166	rs13107325	4	102267552	NFKB1	102501329	102617302	0	0	0	0	0	101767552	102767552	0	1
	166	rs13107325	4	102267552	MANBA	102650271	102760994	0	0	0	0	0	101767552	102767552	0	1
	166	rs34406062	4	102777167	SLC39A8	102251041	102431258	0	0	0	1	1	101767552	102767552	0	1
	166	rs34406062	4	102777167	NFKB1	102501329	102617302	0	0	0	0	0	101767552	102767552	0	1
	166	rs34406062	4	102777167	MANBA	102650271	102760994	1	0	0	0	1	101767552	102767552	0	1
	166	rs34406062	4	102777167	UBE2D3	102794383	102868896	0	0	1	0	1	101767552	102767552	0	1
	166	rs34406062	4	102777167	CISD2	102868978	102889242	0	0	0	0	0	101767552	102767552	0	1
	166	rs34406062	4	102777167	SLC9B1	102885048	103019739	0	0	0	0	0	101767552	102767552	0	1
	166	rs34406062	4	102777167	SLC9B2	103019868	103085829	0	0	0	0	0	101767552	102767552	0	1
	166	rs34406062	4	102777167	BDH2	103079435	103099883	0	1	0	0	1	101767552	102767552	0	1
	166	rs34406062	4	102777167	CENPE	103105806	103198409	0	0	0	0	0	101767552	102767552	0	1
	167	rs201081507	4	101759884	PPP3CA	101023409	101348278	0	0	0	0	0	101767552	102767552	0	0
	167	rs201081507	4	101759884	BANK1	101411286	102074812	1	1	0	0	2	101767552	102767552	0	0
	167	rs201081507	4	101759884	SLC39A8	102251041	102431258	0	0	0	0	0	101767552	102767552	0	0
	167	rs13107325	4	102267552	SLC39A8	102251041	102431258	1	1	0	1	3	101767552	102767552	1	0
	167	rs13107325	4	102267552	BANK1	101411286	102074812	0	0	0	0	0	101767552	102767552	0	0
	167	rs13107325	4	102267552	NFKB1	102501329	102617302	0	0	0	0	0	101767552	102767552	0	0
	167	rs13107325	4	102267552	MANBA	102650271	102760994	0	0	0	0	0	101767552	102767552	0	0
	167	rs13120154	4	103242705	MANBA	102650271	102760994	0	0	0	0	0	101767552	102767552	0	0
	167	rs13120154	4	103242705	UBE2D3	102794383	102868896	0	0	1	0	1	101767552	102767552	0	0
	167	rs13120154	4	103242705	CISD2	102868978	102889242	0	0	0	0	0	101767552	102767552	0	0
	167	rs13120154	4	103242705	SLC9B1	102885048	103019739	0	0	0	0	0	101767552	102767552	0	0
	167	rs13120154	4	103242705	SLC9B2	103019868	103085829	0	0	0	0	0	101767552	102767552	0	0
	167	rs13120154	4	103242705	BDH2	103079435	103099883	0	1	0	0	1	101767552	102767552	0	0
	167	rs13120154	4	103242705	CENPE	103105806	103198409	1	0	0	0	1	101767552	102767552	0	0
	167	rs13120154	4	103242705	TACR3	103586031	103719816	0	0	0	0	0	101767552	102767552	0	0
	168	rs13107325	4	102267552	SLC39A8	102251041	102431258	1	1	0	1	3	101767552	102767552	1	0
	168	rs13107325	4	102267552	BANK1	101411286	102074812	0	0	0	0	0	101767552	102767552	0	0
	168	rs13107325	4	102267552	NFKB1	102501329	102617302	0	0	0	0	0	101767552	102767552	0	0
	168	rs13107325	4	102267552	MANBA	102650271	102760994	0	0	0	0	0	101767552	102767552	0	0
	169	rs230534	4	102527884	NFKB1	102501329	102617302	1	1	1	0	3	102027884	103027884	1	0
	169	rs230534	4	102527884	BANK1	101411286	102074812	0	0	0	0	0	102027884	103027884	0	0
	169	rs230534	4	102527884	SLC39A8	102251041	102431258	0	0	0	0	0	102027884	103027884	0	0
	169	rs230534	4	102527884	MANBA	102650271	102760994	0	0	1	0	1	102027884	103027884	0	0
	169	rs230534	4	102527884	UBE2D3	102794383	102868896	0	0	0	0	0	102027884	103027884	0	0
	169	rs230534	4	102527884	CISD2	102868978	102889242	0	0	0	0	0	102027884	103027884	0	0
	169	rs230534	4	102527884	SLC9B1	102885048	103019739	0	0	0	0	0	102027884	103027884	0	0
	169	rs230534	4	102527884	SLC9B2	103019868	103085829	0	0	0	0	0	102027884	103027884	0	0
	170	rs4280731	4	102944814	SLC9B1	102885048	103019739	1	0	1	0	2	102444814	103444814	1	1
	170	rs4280731	4	102944814	NFKB1	102501329	102617302	0	0	0	0	0	102444814	103444814	0	1
	170	rs4280731	4	102944814	MANBA	102650271	102760994	0	0	1	0	1	102444814	103444814	0	1
	170	rs4280731	4	102944814	UBE2D3	102794383	102868896	0	0	1	0	1	102444814	103444814	0	1
	170	rs4280731	4	102944814	CISD2	102868978	102889242	0	0	1	0	1	102444814	103444814	0	1
	170	rs4280731	4	102944814	SLC9B2	103019868	103085829	0	0	0	0	0	102444814	103444814	0	1
	170	rs4280731	4	102944814	BDH2	103079435	103099883	0	0	0	0	0	102444814	103444814	0	1
	170	rs4280731	4	102944814	CENPE	103105806	103198409	0	0	1	0	1	102444814	103444814	0	1
	171	rs4833443	4	110763487	PITX2	110617423	110642123	1	1	0	0	2	110263487	111263487	1	0
	171	rs4833443	4	110763487	ENPEP	110365733	110565285	0	0	1	0	1	110263487	111263487	0	0
	172	rs55754224	4	113507558	CAMK2D	113451032	113761927	1	1	0	0	2	113007558	114007558	1	1
	172	rs55754224	4	113507558	ANK2	112818109	113383740	0	0	0	0	0	113007558	114007558	0	1
	172	rs55754224	4	113507558	ARSJ	113900284	113979727	0	0	0	0	0	113007558	114007558	0	1
	173	rs6816233	4	113523590	CAMK2D	113451032	113761927	1	1	1	0	3	113023590	114023590	1	0
	173	rs6816233	4	113523590	ANK2	112818109	113383740	0	0	0	0	0	113023590	114023590	0	0
	173	rs6816233	4	113523590	ARSJ	113900284	113979727	0	0	0	0	0	113023590	114023590	0	0
	174	rs55969942	4	122195707	BLTP1	122152333	122362758	1	1	1	0	3	121695707	122695707	1	0
	174	rs55969942	4	122195707	ANXA5	121667955	121697113	0	0	0	0	0	121695707	122695707	0	0
	174	rs55969942	4	122195707	SMIM43	121758933	121765427	0	0	0	0	0	121695707	122695707	0	0
	174	rs55969942	4	122195707	EXOSC9	121801317	121817021	0	0	0	0	0	121695707	122695707	0	0
	174	rs55969942	4	122195707	CCNA2	121816444	121823932	0	0	0	0	0	121695707	122695707	0	0
	174	rs55969942	4	122195707	BBS7	121824440	121870497	0	0	0	0	0	121695707	122695707	0	0
	174	rs55969942	4	122195707	TRPC3	121879027	121951754	0	0	0	0	0	121695707	122695707	0	0
	174	rs55969942	4	122195707	ADAD1	122378966	122429802	0	0	0	0	0	121695707	122695707	0	0
	174	rs55969942	4	122195707	IL2	122451470	122456725	0	0	0	0	0	121695707	122695707	0	0
	174	rs55969942	4	122195707	IL21	122612628	122621069	0	0	0	0	0	121695707	122695707	0	0
	175	rs6839312	4	143200011	USP38	143184917	143223830	1	1	1	0	3	142700011	143700011	1	0
	175	rs6839312	4	143200011	INPP4B	142023160	142847432	0	0	0	0	0	142700011	143700011	0	0
	175	rs6839312	4	143200011	GAB1	143336762	143474568	0	0	1	0	1	142700011	143700011	0	0
	175	rs6839312	4	143200011	SMARCA5	143513463	143557486	0	0	0	0	0	142700011	143700011	0	0
	175	rs6839312	4	143200011	FREM3	143577302	143700675	0	0	0	0	0	142700011	143700011	0	0
	176	rs997850	4	153917282	RNF175	153710125	153760235	0	1	1	0	2	153417282	154417282	1	0
	176	rs997850	4	153917282	TMEM131L	153466346	153636711	0	0	0	0	0	153417282	154417282	0	0
	176	rs997850	4	153917282	TLR2	153701500	153705699	0	0	1	0	1	153417282	154417282	0	0
	176	rs997850	4	153917282	SFRP2	153780592	153789120	1	0	1	0	2	153417282	154417282	0	0
	176	rs997850	4	153917282	DCHS2	154232247	154491778	0	0	0	0	0	153417282	154417282	0	0
	177	rs13107809	4	155679529	GUCY1A1	155666711	155732349	1	1	0	0	2	155179529	156179529	1	0
	177	rs13107809	4	155679529	NPY2R	155208629	155217078	0	0	0	0	0	155179529	156179529	0	0
	177	rs13107809	4	155679529	MAP9	155342658	155376970	0	0	0	0	0	155179529	156179529	0	0
	177	rs13107809	4	155679529	GUCY1B1	155758992	155807591	0	0	0	0	0	155179529	156179529	0	0
	177	rs13107809	4	155679529	ASIC5	155829729	155866273	0	0	0	0	0	155179529	156179529	0	0
	177	rs13107809	4	155679529	TDO2	155854738	155920406	0	0	0	0	0	155179529	156179529	0	0
	177	rs13107809	4	155679529	CTSO	155924118	155953917	0	0	0	0	0	155179529	156179529	0	0
	178	rs2120636	4	161256326	FSTL5	161383897	162164035	1	0	0	0	1	160756326	161756326	0	0
	179	rs4692931	4	168430768	DDX60L	168356735	168537786	1	0	1	0	2	167930768	168930768	1	0
	179	rs4692931	4	168430768	ANXA10	168092515	168187690	0	0	0	0	0	167930768	168930768	0	0
	179	rs4692931	4	168430768	DDX60	168216293	168318807	0	0	0	0	0	167930768	168930768	0	0
	179	rs4692931	4	168430768	PALLD	168497066	168928457	0	0	0	0	0	167930768	168930768	0	0
	179	rs4692931	4	168430768	CBR4	168863770	169010275	0	0	0	0	0	167930768	168930768	0	0
	180	rs365843	4	176501911	SPCS3	176319964	176332245	1	1	0	0	2	176001911	177001911	1	0
	180	rs365843	4	176501911	GPM6A	175632934	176002664	0	0	0	0	0	176001911	177001911	0	0
	180	rs365843	4	176501911	WDR17	176065834	176182827	0	0	0	0	0	176001911	177001911	0	0
	180	rs365843	4	176501911	SPATA4	176184638	176195671	0	0	0	0	0	176001911	177001911	0	0
	180	rs365843	4	176501911	ASB5	176213673	176277571	0	0	0	0	0	176001911	177001911	0	0
	180	rs365843	4	176501911	VEGFC	176683931	176792727	0	0	0	0	0	176001911	177001911	0	0
	181	rs769430224	4	185659450	PDLIM3	185501697	185535612	1	1	0	0	2	185159450	186159450	1	0
	181	rs769430224	4	185659450	CFAP97	185159665	185209504	0	0	0	0	0	185159450	186159450	0	0
	181	rs769430224	4	185659450	SNX25	185204237	185370185	0	0	0	0	0	185159450	186159450	0	0
	181	rs769430224	4	185659450	LRP2BP	185363878	185395899	0	0	0	0	0	185159450	186159450	0	0
	181	rs769430224	4	185659450	ANKRD37	185396021	185400628	0	0	0	0	0	185159450	186159450	0	0
	181	rs769430224	4	185659450	UFSP2	185399540	185425985	0	0	0	0	0	185159450	186159450	0	0
	181	rs769430224	4	185659450	CFAP96	185426240	185449826	0	0	0	0	0	185159450	186159450	0	0
	181	rs769430224	4	185659450	CCDC110	185445182	185471759	0	0	0	0	0	185159450	186159450	0	0
	181	rs769430224	4	185659450	SORBS2	185585444	185956652	0	0	1	0	1	185159450	186159450	0	0
	181	rs769430224	4	185659450	TLR3	186069152	186088069	0	0	0	0	0	185159450	186159450	0	0
	181	rs769430224	4	185659450	FAM149A	186104419	186172667	0	0	0	0	0	185159450	186159450	0	0
	182	rs4990988	5	692915	TPPP	660768	693395	1	1	0	0	2	192915	1192915	1	0
	182	rs4990988	5	692915	LRRC14B	191511	195353	0	0	0	0	0	192915	1192915	0	0
	182	rs4990988	5	692915	CCDC127	196871	218215	0	0	0	0	0	192915	1192915	0	0
	182	rs4990988	5	692915	SDHA	218241	256700	0	0	0	0	0	192915	1192915	0	0
	182	rs4990988	5	692915	PDCD6	271621	353856	0	0	0	0	0	192915	1192915	0	0
	182	rs4990988	5	692915	AHRR	304176	438291	0	0	0	0	0	192915	1192915	0	0
	182	rs4990988	5	692915	EXOC3-AS1	441530	443143	0	0	0	0	0	192915	1192915	0	0
	182	rs4990988	5	692915	EXOC3	443158	471937	0	0	0	0	0	192915	1192915	0	0
	182	rs4990988	5	692915	SLC9A3	473310	524332	0	0	0	0	0	192915	1192915	0	0
	182	rs4990988	5	692915	CEP72	612272	667168	0	0	1	0	1	192915	1192915	0	0
	182	rs4990988	5	692915	ZDHHC11	710356	850986	0	0	0	0	0	192915	1192915	0	0
	182	rs4990988	5	692915	ZDHHC11B	710360	766952	0	0	0	0	0	192915	1192915	0	0
	182	rs4990988	5	692915	BRD9	850291	892824	0	0	0	0	0	192915	1192915	0	0
	182	rs4990988	5	692915	TRIP13	892643	919357	0	0	0	0	0	192915	1192915	0	0
	182	rs4990988	5	692915	NKD2	1008829	1038943	0	0	0	0	0	192915	1192915	0	0
	182	rs4990988	5	692915	SLC12A7	1050384	1112035	0	0	0	0	0	192915	1192915	0	0
	183	rs7726159	5	1282204	TERT	1253147	1295069	1	1	0	0	2	782204	1782204	1	0
	183	rs7726159	5	1282204	ZDHHC11	710356	850986	0	0	0	0	0	782204	1782204	0	0
	183	rs7726159	5	1282204	BRD9	850291	892824	0	0	0	0	0	782204	1782204	0	0
	183	rs7726159	5	1282204	TRIP13	892643	919357	0	0	0	0	0	782204	1782204	0	0
	183	rs7726159	5	1282204	NKD2	1008829	1038943	0	0	0	0	0	782204	1782204	0	0
	183	rs7726159	5	1282204	SLC12A7	1050384	1112035	0	0	0	0	0	782204	1782204	0	0
	183	rs7726159	5	1282204	SLC6A19	1201595	1225117	0	0	0	0	0	782204	1782204	0	0
	183	rs7726159	5	1282204	SLC6A18	1225355	1246189	0	0	0	0	0	782204	1782204	0	0
	183	rs7726159	5	1282204	CLPTM1L	1317744	1345099	0	0	0	0	0	782204	1782204	0	0
	183	rs7726159	5	1282204	SLC6A3	1392794	1445430	0	0	1	0	1	782204	1782204	0	0
	183	rs7726159	5	1282204	LPCAT1	1456480	1523977	0	0	1	0	1	782204	1782204	0	0
	184	rs267984	5	10714252	DAP	10679230	10761272	1	1	0	0	2	10214252	11214252	1	0
	184	rs267984	5	10714252	ATPSCKMT	10226330	10249897	0	0	0	0	0	10214252	11214252	0	0
	184	rs267984	5	10714252	CCT5	10249921	10266412	0	0	0	0	0	10214252	11214252	0	0
	184	rs267984	5	10714252	CMBL	10275875	10308026	0	0	0	0	0	10214252	11214252	0	0
	184	rs267984	5	10714252	MARCHF6	10353703	10440388	0	0	0	0	0	10214252	11214252	0	0
	184	rs267984	5	10714252	ROPN1L	10441524	10472029	0	0	0	0	0	10214252	11214252	0	0
	184	rs267984	5	10714252	ANKRD33B	10564330	10650196	0	0	0	0	0	10214252	11214252	0	0
	184	rs267984	5	10714252	CTNND2	10971840	11904043	0	0	0	0	0	10214252	11214252	0	0
	185	rs11747360	5	34506738	RAI14	34656237	34832627	1	1	0	0	2	34006738	35006738	1	0
	185	rs11747360	5	34506738	AMACR	33986178	34008115	0	0	0	0	0	34006738	35006738	0	0
	185	rs11747360	5	34506738	C1QTNF3	34019448	34043832	0	0	0	0	0	34006738	35006738	0	0
	185	rs11747360	5	34506738	TTC23L	34838833	34899456	0	0	0	0	0	34006738	35006738	0	0
	185	rs11747360	5	34506738	RAD1	34905264	34918989	0	0	0	0	0	34006738	35006738	0	0
	185	rs11747360	5	34506738	BRIX1	34915376	34925996	0	0	0	0	0	34006738	35006738	0	0
	185	rs11747360	5	34506738	DNAJC21	34929593	34958964	0	0	0	0	0	34006738	35006738	0	0
	185	rs11747360	5	34506738	AGXT2	34998101	35048093	0	0	0	0	0	34006738	35006738	0	0
	186	rs4360064	5	38788458	OSMR	38845858	38945596	1	1	0	0	2	38288458	39288458	1	0
	186	rs4360064	5	38788458	EGFLAM	38258409	38465021	0	0	0	0	0	38288458	39288458	0	0
	186	rs4360064	5	38788458	LIFR	38474963	38608354	0	0	0	0	0	38288458	39288458	0	0
	186	rs4360064	5	38788458	RICTOR	38937919	39074408	0	0	0	0	0	38288458	39288458	0	0
	186	rs4360064	5	38788458	FYB1	39105236	39274528	0	0	0	0	0	38288458	39288458	0	0
	186	rs4360064	5	38788458	C9	39284262	39424868	0	0	0	0	0	38288458	39288458	0	0
	187	rs395157	5	38867630	OSMR	38845858	38945596	1	1	1	0	3	38367630	39367630	1	0
	187	rs395157	5	38867630	EGFLAM	38258409	38465021	0	0	0	0	0	38367630	39367630	0	0
	187	rs395157	5	38867630	LIFR	38474963	38608354	0	0	0	0	0	38367630	39367630	0	0
	187	rs395157	5	38867630	RICTOR	38937919	39074408	0	0	0	0	0	38367630	39367630	0	0
	187	rs395157	5	38867630	FYB1	39105236	39274528	0	0	0	0	0	38367630	39367630	0	0
	187	rs395157	5	38867630	C9	39284262	39424868	0	0	0	0	0	38367630	39367630	0	0
	188	rs6884555	5	39478603	DAB2	39371678	39462300	1	1	1	0	3	38978603	39978603	1	0
	188	rs6884555	5	39478603	RICTOR	38937919	39074408	0	0	0	0	0	38978603	39978603	0	0
	188	rs6884555	5	39478603	FYB1	39105236	39274528	0	0	0	0	0	38978603	39978603	0	0
	188	rs6884555	5	39478603	C9	39284262	39424868	0	0	0	0	0	38978603	39978603	0	0
	189	rs10461728	5	39612423	DAB2	39371678	39462300	1	1	0	0	2	39112423	40112423	1	0
	189	rs10461728	5	39612423	FYB1	39105236	39274528	0	0	0	0	0	39112423	40112423	0	0
	189	rs10461728	5	39612423	C9	39284262	39424868	0	0	0	0	0	39112423	40112423	0	0
	190	rs6879489	5	40425088	PTGER4	40679498	40693735	1	1	1	0	3	39925088	40925088	1	0
	190	rs6879489	5	40425088	TTC33	40714475	40755975	0	0	1	0	1	39925088	40925088	0	0
	190	rs6879489	5	40425088	PRKAA1	40759379	40798374	0	0	0	0	0	39925088	40925088	0	0
	190	rs6879489	5	40425088	RPL37	40825262	40835335	0	0	0	0	0	39925088	40925088	0	0
	190	rs6879489	5	40425088	CARD6	40841184	40860173	0	0	1	0	1	39925088	40925088	0	0
	190	rs6879489	5	40425088	C7	40909252	40982939	0	0	0	0	0	39925088	40925088	0	0
	191	rs7706939	5	54517737	SNX18	54517759	54546585	1	1	1	0	3	54017737	55017737	1	0
	191	rs7706939	5	54517737	ARL15	53883945	54310582	0	0	0	0	0	54017737	55017737	0	0
	191	rs7706939	5	54517737	HSPB3	54455615	54456377	0	0	1	0	1	54017737	55017737	0	0
	191	rs7706939	5	54517737	ESM1	54977864	55022671	0	0	0	0	0	54017737	55017737	0	0
	192	rs6453431	5	79198050	JMY	79236189	79327215	0	1	1	1	3	78698050	79698050	1	0
	192	rs6453431	5	79198050	LHFPL2	78485215	78770021	0	0	0	0	0	78698050	79698050	0	0
	192	rs6453431	5	79198050	ARSB	78777209	78986087	0	0	0	0	0	78698050	79698050	0	0
	192	rs6453431	5	79198050	DMGDH	78997615	79236038	1	0	1	0	2	78698050	79698050	0	0
	192	rs6453431	5	79198050	BHMT2	79069717	79089466	0	0	0	0	0	78698050	79698050	0	0
	192	rs6453431	5	79198050	BHMT	79111779	79132285	0	0	1	0	1	78698050	79698050	0	0
	192	rs6453431	5	79198050	HOMER1	79372636	79514217	0	0	0	0	0	78698050	79698050	0	0
	192	rs6453431	5	79198050	TENT2	79612120	79686648	0	0	0	0	0	78698050	79698050	0	0
	192	rs6453431	5	79198050	CMYA5	79689877	79800240	0	0	0	0	0	78698050	79698050	0	0
	193	rs568299	5	81017967	RASGRF2	80960672	81230156	1	1	0	0	2	80517967	81517967	1	0
	193	rs568299	5	81017967	FAM151B	80487969	80542563	0	0	0	0	0	80517967	81517967	0	0
	193	rs568299	5	81017967	ANKRD34B	80556755	80570488	0	0	0	0	0	80517967	81517967	0	0
	193	rs568299	5	81017967	DHFR	80626228	80654983	0	0	0	0	0	80517967	81517967	0	0
	193	rs568299	5	81017967	MSH3	80654648	80876460	0	0	0	0	0	80517967	81517967	0	0
	193	rs568299	5	81017967	CKMT2	81233285	81266397	0	0	0	0	0	80517967	81517967	0	0
	193	rs568299	5	81017967	ZCCHC9	81301590	81313297	0	0	0	0	0	80517967	81517967	0	0
	193	rs568299	5	81017967	ACOT12	81330005	81394179	0	0	0	0	0	80517967	81517967	0	0
	193	rs568299	5	81017967	SSBP2	81413021	81751797	0	0	0	0	0	80517967	81517967	0	0
	194	rs187338729	5	81035624	FAM151B	80487969	80542563	0	0	0	0	0	80535624	81535624	0	0
	194	rs187338729	5	81035624	ANKRD34B	80556755	80570488	0	0	0	0	0	80535624	81535624	0	0
	194	rs187338729	5	81035624	DHFR	80626228	80654983	0	0	0	0	0	80535624	81535624	0	0
	194	rs187338729	5	81035624	MSH3	80654648	80876460	0	0	0	0	0	80535624	81535624	0	0
	194	rs187338729	5	81035624	RASGRF2	80960672	81230156	1	0	0	0	1	80535624	81535624	0	0
	194	rs187338729	5	81035624	CKMT2	81233285	81266397	0	0	0	0	0	80535624	81535624	0	0
	194	rs187338729	5	81035624	ZCCHC9	81301590	81313297	0	0	0	0	0	80535624	81535624	0	0
	194	rs187338729	5	81035624	ACOT12	81330005	81394179	0	0	0	0	0	80535624	81535624	0	0
	194	rs187338729	5	81035624	SSBP2	81413021	81751797	0	0	0	0	0	80535624	81535624	0	0
	195	rs61749613	5	83519351	VCAN	83471465	83582303	1	1	0	1	3	83019351	84019351	1	0
	195	rs61749613	5	83519351	TMEM167A	83052846	83077863	0	0	0	0	0	83019351	84019351	0	0
	195	rs61749613	5	83519351	XRCC4	83077498	83353787	0	0	0	0	0	83019351	84019351	0	0
	195	rs61749613	5	83519351	HAPLN1	83637805	83721613	0	0	0	0	0	83019351	84019351	0	0
	196	rs10043462	5	98430152	RGMB	98768650	98798643	1	1	1	0	3	97930152	98930152	1	1
	196	rs10043462	5	98430152	CHD1	98855204	98926536	0	0	0	0	0	97930152	98930152	0	1
	197	rs1037598	5	98447421	RGMB	98768650	98798643	1	1	1	0	3	97947421	98947421	1	0
	197	rs1037598	5	98447421	CHD1	98855204	98926536	0	0	0	0	0	97947421	98947421	0	0
	198	rs7705558	5	109309144	PJA2	109334709	109409994	1	1	1	1	4	108809144	109809144	1	0
	198	rs7705558	5	109309144	FER	108747822	109196841	0	0	0	0	0	108809144	109809144	0	0
	198	rs7705558	5	109309144	MAN2A1	109689366	109869625	0	0	1	0	1	108809144	109809144	0	0
	199	rs4705749	5	113013682	MCC	113022099	113488830	0	1	1	0	2	112513682	113513682	1	0
	199	rs4705749	5	113013682	APC	112707498	112846239	0	0	0	0	0	112513682	113513682	0	0
	199	rs4705749	5	113013682	SRP19	112861222	112869788	0	0	0	0	0	112513682	113513682	0	0
	199	rs4705749	5	113013682	REEP5	112876387	112922539	0	0	0	0	0	112513682	113513682	0	0
	199	rs4705749	5	113013682	ZRSR2P1	112891616	112893094	0	0	0	0	0	112513682	113513682	0	0
	199	rs4705749	5	113013682	DCP2	112976702	113020970	1	0	1	0	2	112513682	113513682	0	0
	199	rs4705749	5	113013682	TSSK1B	113432554	113435031	0	0	0	0	0	112513682	113513682	0	0
	200	rs55722650	5	132271607	P4HA2	132191838	132295315	0	1	1	0	2	131771607	132771607	1	0
	200	rs55722650	5	132271607	FNIP1	131641714	131797017	0	0	1	0	1	131771607	132771607	0	0
	200	rs55722650	5	132271607	ACSL6	131806990	132012243	0	0	1	0	1	131771607	132771607	0	0
	200	rs55722650	5	132271607	IL3	132060529	132063204	0	0	0	0	0	131771607	132771607	0	0
	200	rs55722650	5	132271607	CSF2	132073790	132076166	0	0	0	0	0	131771607	132771607	0	0
	200	rs55722650	5	132271607	PDLIM4	132257671	132273454	1	0	1	0	2	131771607	132771607	0	0
	200	rs55722650	5	132271607	SLC22A4	132294443	132344206	0	0	0	0	0	131771607	132771607	0	0
	200	rs55722650	5	132271607	SLC22A5	132369752	132395614	0	0	1	0	1	131771607	132771607	0	0
	200	rs55722650	5	132271607	CARINH	132410636	132476044	0	0	1	0	1	131771607	132771607	0	0
	200	rs55722650	5	132271607	IRF1	132481609	132490798	0	0	1	0	1	131771607	132771607	0	0
	200	rs55722650	5	132271607	IL5	132541444	132556838	0	0	0	0	0	131771607	132771607	0	0
	200	rs55722650	5	132271607	RAD50	132556019	132644621	0	0	1	0	1	131771607	132771607	0	0
	200	rs55722650	5	132271607	IL13	132656263	132661110	0	0	0	0	0	131771607	132771607	0	0
	200	rs55722650	5	132271607	IL4	132673986	132682676	0	0	1	0	1	131771607	132771607	0	0
	200	rs55722650	5	132271607	KIF3A	132692628	132737638	0	0	1	0	1	131771607	132771607	0	0
	200	rs55722650	5	132271607	CCNI2	132747445	132754164	0	0	0	0	0	131771607	132771607	0	0
	200	rs55722650	5	132271607	SEPTIN8	132750817	132807241	0	0	0	0	0	131771607	132771607	0	0
[truncated: 6,185 more rows]

## Sheet: S9 - Colocalization (eQTL)
	Supplementary Table 9. Colocalization (eQTL)
	locus	chr	bp	rsid	trait	tissue	hgnc_symbol	PP4	shared_snp	shared_snp_rsid	p_gwas_exact	p_eqtl_exact	beta_gwas_exact	slope_eqtl_exact	alt_gwas_exact	alt_eqtl_exact	p_gwas_best_snp	p_eqtl_best_snp	snp_pp4	credible_set_size	credible_set_snps
	1	1	1327586	rs307349	Inflammatory bowel disease	Esophagus_Muscularis	SDF4	0.77832	chr1_1228424_C_T_b38	rs7515488	1.854e-05	3.44342e-09	0.041	-0.202575	T	T	0.0002561	3.44342e-09	0.737963	2	chr1_1228424_C_T_b38;chr1_1238231_G_A_b38
	1	1	1327586	rs307349	Inflammatory bowel disease	Artery_Aorta	SDF4	0.755059	chr1_1216537_G_A_b38	rs78479912	1.854e-05	5.56077e-10	0.0809	-0.381756	A	A	0.0006549	5.56077e-10	0.707863	2	chr1_1216537_G_A_b38;chr1_1217351_G_A_b38
	1	1	1327586	rs307349	Inflammatory bowel disease	Nerve_Tibial	DVL1	0.78135	chr1_1326444_G_C_b38	rs307348	2.928e-13	1.13524e-09	-0.0996	0.212407	C	C	8.194e-13	3.04428e-08	0.340347	5	chr1_1326444_G_C_b38;chr1_1345965_C_T_b38;chr1_1351517_G_C_b38;chr1_1327586_C_T_b38;chr1_1351747_G_A_b38
	1	1	1327586	rs307349	Inflammatory bowel disease	Muscle_Skeletal	INTS11	0.987101	chr1_1327586_C_T_b38	rs307349	2.928e-13	1.96418e-16	-0.0989	-0.292361	T	T	2.928e-13	1.96418e-16	0.939459	1	chr1_1327586_C_T_b38
	1	1	1327586	rs307349	Inflammatory bowel disease	Heart_Left_Ventricle	INTS11	0.98543	chr1_1330125_G_A_b38	rs35946613	1.513e-11	2.15994e-09	-0.0637	-0.219051	A	A	3.538e-11	2.15994e-09	0.801733	2	chr1_1330125_G_A_b38;chr1_1308516_C_T_b38
	1	1	1327586	rs307349	Inflammatory bowel disease	Adrenal_Gland	INTS11	0.98093	chr1_1327586_C_T_b38	rs307349	2.928e-13	8.77104e-08	-0.0989	-0.288408	T	T	2.928e-13	1.31662e-07	0.35096	12	chr1_1327586_C_T_b38;chr1_1381294_C_T_b38;chr1_1381268_C_T_b38;chr1_1326444_G_C_b38;chr1_1351747_G_A_b38;chr1_1345965_C_T_b38;chr1_1379664_G_A_b38;chr1_1380790_G_A_b38;chr1_1376336_G_A_b38;chr1_1375595_C_T_b38;chr1_1376092_G_A_b38;chr1_1359138_C_T_b38
	1	1	1327586	rs307349	Inflammatory bowel disease	Adipose_Subcutaneous	INTS11	0.978641	chr1_1327586_C_T_b38	rs307349	2.928e-13	5.62516e-15	-0.0989	-0.29688	T	T	2.928e-13	9.05942e-15	0.361708	8	chr1_1327586_C_T_b38;chr1_1326444_G_C_b38;chr1_1345965_C_T_b38;chr1_1351517_G_C_b38;chr1_1351747_G_A_b38;chr1_1353091_C_T_b38;chr1_1352542_G_A_b38;chr1_1327764_G_A_b38
	1	1	1327586	rs307349	Inflammatory bowel disease	Esophagus_Muscularis	INTS11	0.976948	chr1_1326444_G_C_b38	rs307348	2.928e-13	4.47926e-13	-0.0996	-0.344983	C	C	8.194e-13	4.47926e-13	0.467345	9	chr1_1326444_G_C_b38;chr1_1345965_C_T_b38;chr1_1351747_G_A_b38;chr1_1327586_C_T_b38;chr1_1352542_G_A_b38;chr1_1381294_C_T_b38;chr1_1380790_G_A_b38;chr1_1379664_G_A_b38;chr1_1376336_G_A_b38
	1	1	1327586	rs307349	Inflammatory bowel disease	Adipose_Visceral_Omentum	INTS11	0.976058	chr1_1380790_G_A_b38	rs2649587	2.928e-13	1.97626e-11	-0.0941	-0.270211	A	A	1.779e-12	1.97626e-11	0.184268	8	chr1_1380790_G_A_b38;chr1_1381294_C_T_b38;chr1_1327586_C_T_b38;chr1_1381268_C_T_b38;chr1_1376336_G_A_b38;chr1_1385553_G_A_b38;chr1_1379664_G_A_b38;chr1_1375595_C_T_b38
	1	1	1327586	rs307349	Inflammatory bowel disease	Brain_Cerebellum	INTS11	0.975807	chr1_1326444_G_C_b38	rs307348	2.928e-13	2.51192e-15	-0.0996	-0.628094	C	C	8.194e-13	2.51192e-15	0.316282	9	chr1_1326444_G_C_b38;chr1_1351517_G_C_b38;chr1_1351747_G_A_b38;chr1_1345965_C_T_b38;chr1_1379664_G_A_b38;chr1_1376336_G_A_b38;chr1_1375595_C_T_b38;chr1_1376092_G_A_b38;chr1_1318756_G_A_b38
	1	1	1327586	rs307349	Inflammatory bowel disease	Colon_Transverse	INTS11	0.975116	chr1_1381294_C_T_b38	rs2649585	2.928e-13	5.66268e-08	-0.0954	-0.292318	T	T	8.81e-13	6.87632e-08	0.238534	10	chr1_1381294_C_T_b38;chr1_1381268_C_T_b38;chr1_1380790_G_A_b38;chr1_1376336_G_A_b38;chr1_1379664_G_A_b38;chr1_1375595_C_T_b38;chr1_1376092_G_A_b38;chr1_1351517_G_C_b38;chr1_1351747_G_A_b38;chr1_1345965_C_T_b38
	1	1	1327586	rs307349	Inflammatory bowel disease	Breast_Mammary_Tissue	INTS11	0.972205	chr1_1376336_G_A_b38	rs2649589	2.928e-13	7.12546e-08	-0.0933	-0.237896	A	A	1.775e-12	7.12546e-08	0.183378	8	chr1_1376336_G_A_b38;chr1_1375595_C_T_b38;chr1_1381294_C_T_b38;chr1_1376092_G_A_b38;chr1_1381268_C_T_b38;chr1_1379664_G_A_b38;chr1_1380790_G_A_b38;chr1_1385553_G_A_b38
	1	1	1327586	rs307349	Inflammatory bowel disease	Thyroid	INTS11	0.96896	chr1_1379664_G_A_b38	rs2368566	2.928e-13	3.36713e-21	-0.0941	-0.284484	A	A	1.581e-12	3.36713e-21	0.264029	5	chr1_1379664_G_A_b38;chr1_1376336_G_A_b38;chr1_1375595_C_T_b38;chr1_1376092_G_A_b38;chr1_1327586_C_T_b38
	1	1	1327586	rs307349	Inflammatory bowel disease	Ovary	INTS11	0.964354	chr1_1351517_G_C_b38	rs34380086	2.928e-13	1.41772e-08	-0.0998	-0.345506	C	C	7.36e-13	3.1647e-08	0.111093	18	chr1_1351517_G_C_b38;chr1_1351747_G_A_b38;chr1_1345965_C_T_b38;chr1_1381294_C_T_b38;chr1_1352542_G_A_b38;chr1_1381268_C_T_b38;chr1_1326444_G_C_b38;chr1_1379664_G_A_b38;chr1_1376336_G_A_b38;chr1_1375595_C_T_b38;chr1_1376092_G_A_b38;chr1_1380790_G_A_b38;chr1_1378635_C_T_b38;chr1_1376153_G_C_b38;chr1_1380513_C_T_b38;chr1_1378865_C_T_b38;chr1_1354531_G_A_b38;chr1_1378792_C_T_b38
	1	1	1327586	rs307349	Inflammatory bowel disease	Vagina	INTS11	0.959655	chr1_1351517_G_C_b38	rs34380086	7.36e-13	2.84532e-07	-0.0998	-0.485715	C	C	7.36e-13	8.03937e-07	0.135285	18	chr1_1351517_G_C_b38;chr1_1326444_G_C_b38;chr1_1351747_G_A_b38;chr1_1345965_C_T_b38;chr1_1352542_G_A_b38;chr1_1354531_G_A_b38;chr1_1327764_G_A_b38;chr1_1362042_C_T_b38;chr1_1380513_C_T_b38;chr1_1378635_C_T_b38;chr1_1376153_G_C_b38;chr1_1363157_C_T_b38;chr1_1381294_C_T_b38;chr1_1363031_C_T_b38;chr1_1378865_C_T_b38;chr1_1378792_C_T_b38;chr1_1381268_C_T_b38;chr1_1383798_AG_A_b38
	1	1	1327586	rs307349	Inflammatory bowel disease	Pancreas	INTS11	0.953934	chr1_1319063_G_A_b38	rs1886772	2.928e-13	8.84776e-14	-0.0954	-0.325071	A	A	2.834e-12	8.84776e-14	0.396552	3	chr1_1319063_G_A_b38;chr1_1327586_C_T_b38;chr1_1318756_G_A_b38
	1	1	1327586	rs307349	Inflammatory bowel disease	Brain_Nucleus_accumbens_basal_ganglia	INTS11	0.944304	chr1_1353091_C_T_b38	rs3766183	2.928e-13	1.90093e-07	-0.0947	-0.286149	T	T	4.298e-12	1.90093e-07	0.0973356	19	chr1_1353091_C_T_b38;chr1_1362042_C_T_b38;chr1_1379664_G_A_b38;chr1_1376336_G_A_b38;chr1_1375595_C_T_b38;chr1_1376092_G_A_b38;chr1_1378635_C_T_b38;chr1_1376153_G_C_b38;chr1_1378865_C_T_b38;chr1_1378792_C_T_b38;chr1_1363157_C_T_b38;chr1_1363031_C_T_b38;chr1_1351517_G_C_b38;chr1_1326444_G_C_b38;chr1_1351747_G_A_b38;chr1_1318756_G_A_b38;chr1_1345965_C_T_b38;chr1_1380790_G_A_b38;chr1_1319063_G_A_b38
	1	1	1327586	rs307349	Inflammatory bowel disease	Nerve_Tibial	INTS11	0.943188	chr1_1379664_G_A_b38	rs2368566	2.928e-13	2.03864e-16	-0.0941	-0.282459	A	A	1.581e-12	2.03864e-16	0.192344	10	chr1_1379664_G_A_b38;chr1_1376336_G_A_b38;chr1_1375595_C_T_b38;chr1_1376092_G_A_b38;chr1_1385553_G_A_b38;chr1_1351517_G_C_b38;chr1_1381294_C_T_b38;chr1_1351747_G_A_b38;chr1_1326444_G_C_b38;chr1_1378204_G_C_b38
	1	1	1327586	rs307349	Inflammatory bowel disease	Brain_Putamen_basal_ganglia	INTS11	0.931746	chr1_1381294_C_T_b38	rs2649585	7.36e-13	1.03494e-06	-0.0954	-0.272526	T	T	8.81e-13	1.03193e-05	0.0970842	19	chr1_1381294_C_T_b38;chr1_1318756_G_A_b38;chr1_1319063_G_A_b38;chr1_1381268_C_T_b38;chr1_1326444_G_C_b38;chr1_1327982_G_A_b38;chr1_1368047_ACT_A_b38;chr1_1380790_G_A_b38;chr1_1327211_C_T_b38;chr1_1379664_G_A_b38;chr1_1352542_G_A_b38;chr1_1351517_G_C_b38;chr1_1376336_G_A_b38;chr1_1351747_G_A_b38;chr1_1375595_C_T_b38;chr1_1376092_G_A_b38;chr1_1345965_C_T_b38;chr1_1359138_C_T_b38;chr1_1358907_C_A_b38
	1	1	1327586	rs307349	Inflammatory bowel disease	Brain_Cerebellar_Hemisphere	INTS11	0.931305	chr1_1318756_G_A_b38	rs4970432	2.928e-13	1.29173e-19	-0.0956	-0.558544	A	A	2.588e-12	1.29173e-19	0.402057	3	chr1_1318756_G_A_b38;chr1_1319063_G_A_b38;chr1_1327211_C_T_b38
	1	1	1327586	rs307349	Inflammatory bowel disease	Cells_Cultured_fibroblasts	INTS11	0.922268	chr1_1383798_AG_A_b38	rs34500387	2.318e-12	1.70967e-06	-0.092	-0.1706	A	A	7.186e-12	6.768e-06	0.18543	11	chr1_1383798_AG_A_b38;chr1_1399922_C_T_b38;chr1_1380513_C_T_b38;chr1_1308516_C_T_b38;chr1_1385384_G_A_b38;chr1_1395050_G_A_b38;chr1_1378635_C_T_b38;chr1_1376153_G_C_b38;chr1_1378865_C_T_b38;chr1_1378792_C_T_b38;chr1_1389827_C_T_b38
	1	1	1327586	rs307349	Inflammatory bowel disease	Skin_Not_Sun_Exposed_Suprapubic	INTS11	0.920559	chr1_1327586_C_T_b38	rs307349	2.928e-13	9.59746e-07	-0.0989	-0.131596	T	T	2.928e-13	8.50901e-06	0.323473	9	chr1_1327586_C_T_b38;chr1_1318756_G_A_b38;chr1_1319063_G_A_b38;chr1_1353091_C_T_b38;chr1_1379664_G_A_b38;chr1_1376336_G_A_b38;chr1_1412488_C_CAG_b38;chr1_1375595_C_T_b38;chr1_1376092_G_A_b38
	1	1	1327586	rs307349	Inflammatory bowel disease	Skin_Sun_Exposed_Lower_leg	INTS11	0.861857	chr1_1379664_G_A_b38	rs2368566	2.928e-13	2.84145e-09	-0.0941	-0.16147	A	A	1.581e-12	3.84745e-08	0.132127	13	chr1_1379664_G_A_b38;chr1_1376336_G_A_b38;chr1_1375595_C_T_b38;chr1_1376092_G_A_b38;chr1_1351517_G_C_b38;chr1_1380790_G_A_b38;chr1_1381294_C_T_b38;chr1_1352542_G_A_b38;chr1_1358384_G_C_b38;chr1_1378204_G_C_b38;chr1_1381268_C_T_b38;chr1_1345965_C_T_b38;chr1_1378635_C_T_b38
	1	1	1327586	rs307349	Inflammatory bowel disease	Esophagus_Mucosa	INTS11	0.781026	chr1_1327586_C_T_b38	rs307349	2.928e-13	3.41403e-08	-0.0989	-0.177804	T	T	2.928e-13	1.7063e-06	0.298018	9	chr1_1327586_C_T_b38;chr1_1330125_G_A_b38;chr1_1308516_C_T_b38;chr1_1412488_C_CAG_b38;chr1_1318756_G_A_b38;chr1_1319063_G_A_b38;chr1_1327982_G_A_b38;chr1_1381294_C_T_b38;chr1_1359138_C_T_b38
	1	1	1327586	rs307349	Inflammatory bowel disease	Nerve_Tibial	ACAP3	0.938729	chr1_1327982_G_A_b38	rs4970433	2.928e-13	1.01731e-08	-0.0951	0.156753	A	A	3.46e-12	1.38584e-08	0.334228	3	chr1_1327982_G_A_b38;chr1_1327211_C_T_b38;chr1_1327586_C_T_b38
	1	1	1327586	rs307349	Inflammatory bowel disease	Cells_Cultured_fibroblasts	ACAP3	0.821164	chr1_1327586_C_T_b38	rs307349	2.928e-13	7.82202e-07	-0.0989	0.129827	T	T	2.928e-13	0.000101517	0.12329	13	chr1_1327586_C_T_b38;chr1_1319063_G_A_b38;chr1_1308516_C_T_b38;chr1_1351747_G_A_b38;chr1_1326444_G_C_b38;chr1_1351517_G_C_b38;chr1_1345965_C_T_b38;chr1_1352542_G_A_b38;chr1_1318756_G_A_b38;chr1_1327982_G_A_b38;chr1_1412488_C_CAG_b38;chr1_1354531_G_A_b38;chr1_1385553_G_A_b38
	1	1	1327586	rs307349	Inflammatory bowel disease	Brain_Cortex	ATAD3B	0.990721	chr1_1387650_G_A_b38	rs146564472	1.032e-09	2.42008e-13	0.1055	-0.953631	A	A	1.032e-09	3.1779e-09	0.922105	2	chr1_1387650_G_A_b38;chr1_1401246_G_A_b38
	1	1	1327586	rs307349	Inflammatory bowel disease	Brain_Spinal_cord_cervical_c-1	ATAD3B	0.849776	chr1_1397445_T_A_b38	rs142267230	8.864e-05	1.32239e-12	0.1136	-2.15225	A	A	8.864e-05	1.32239e-12	0.10131	13	chr1_1397445_T_A_b38;chr1_1375267_C_T_b38;chr1_1384489_G_C_b38;chr1_1370339_G_A_b38;chr1_1421658_G_A_b38;chr1_1403478_G_A_b38;chr1_1399139_G_C_b38;chr1_1358092_C_T_b38;chr1_1340350_G_A_b38;chr1_1342667_G_A_b38;chr1_1334708_AC_A_b38;chr1_1358995_G_T_b38;chr1_1347793_G_T_b38
	1	1	1327586	rs307349	Inflammatory bowel disease	Adipose_Visceral_Omentum	SSU72	0.96204	chr1_1547630_G_A_b38	rs7517401	9.251e-07	1.00829e-15	0.04	0.139787	A	A	4.648e-06	1.00829e-15	0.407353	4	chr1_1547630_G_A_b38;chr1_1575421_C_T_b38;chr1_1575724_G_C_b38;chr1_1575864_G_A_b38
	1	1	1327586	rs307349	Inflammatory bowel disease	Heart_Left_Ventricle	SCNN1D	0.832214	chr1_1282954_G_A_b38	rs146421901	2.308e-05	1.91814e-09	0.0839	0.497868	A	A	0.0002189	1.91814e-09	0.172402	8	chr1_1282954_G_A_b38;chr1_1280878_G_A_b38;chr1_1279162_G_A_b38;chr1_1278773_G_A_b38;chr1_1271239_C_A_b38;chr1_1272815_G_C_b38;chr1_1274953_C_T_b38;chr1_1275088_C_T_b38
	1	1	1327586	rs307349	Inflammatory bowel disease	Adipose_Subcutaneous	SCNN1D	0.828824	chr1_1282954_G_A_b38	rs146421901	2.308e-05	1.29809e-10	0.0839	0.412637	A	A	0.0002189	1.29809e-10	0.210802	6	chr1_1282954_G_A_b38;chr1_1280878_G_A_b38;chr1_1279162_G_A_b38;chr1_1278773_G_A_b38;chr1_1283510_G_C_b38;chr1_1279298_C_T_b38
	1	1	1327586	rs307349	Inflammatory bowel disease	Brain_Cerebellum	SCNN1D	0.820027	chr1_1280332_C_T_b38	rs12079515	5.618e-05	4.52153e-08	0.0719	0.627553	T	T	0.0001693	1.43612e-07	0.250604	7	chr1_1280332_C_T_b38;chr1_1254283_G_A_b38;chr1_1283510_G_C_b38;chr1_1283472_G_T_b38;chr1_1270963_C_A_b38;chr1_1282954_G_A_b38;chr1_1280878_G_A_b38
	1	1	1327586	rs307349	Inflammatory bowel disease	Brain_Cortex	SCNN1D	0.815013	chr1_1254283_G_A_b38	rs12060210	2.308e-05	1.08928e-10	0.0703	0.70394	A	A	0.0003016	1.08928e-10	0.559851	3	chr1_1254283_G_A_b38;chr1_1283510_G_C_b38;chr1_1283472_G_T_b38
	1	1	1327586	rs307349	Inflammatory bowel disease	Colon_Transverse	SCNN1D	0.736649	chr1_1270963_C_A_b38	rs6667923	5.318e-06	6.06082e-09	0.0656	0.304031	A	A	0.0006021	6.06082e-09	0.390071	7	chr1_1270963_C_A_b38;chr1_1279298_C_T_b38;chr1_1271239_C_A_b38;chr1_1277232_G_T_b38;chr1_1272815_G_C_b38;chr1_1274953_C_T_b38;chr1_1275088_C_T_b38
	1	1	1327586	rs307349	Inflammatory bowel disease	Colon_Transverse	MXRA8	0.975411	chr1_1422081_C_T_b38	rs1781134	2.588e-12	1.95287e-07	0.0895	-0.178225	T	T	6.425e-12	3.75125e-07	0.71339	5	chr1_1422081_C_T_b38;chr1_1425013_C_T_b38;chr1_1389827_C_T_b38;chr1_1330125_G_A_b38;chr1_1378204_G_C_b38
	1	1	1327586	rs307349	Inflammatory bowel disease	Esophagus_Mucosa	MXRA8	0.972916	chr1_1351747_G_A_b38	rs307380	2.928e-13	1.60933e-23	-0.0996	0.486862	A	A	8.141e-13	1.60933e-23	0.507349	5	chr1_1351747_G_A_b38;chr1_1326444_G_C_b38;chr1_1345965_C_T_b38;chr1_1351517_G_C_b38;chr1_1352542_G_A_b38
	1	1	1327586	rs307349	Inflammatory bowel disease	Heart_Atrial_Appendage	MXRA8	0.928608	chr1_1327982_G_A_b38	rs4970433	2.928e-13	7.72117e-09	-0.0951	0.224303	A	A	3.46e-12	1.04178e-08	0.306977	6	chr1_1327982_G_A_b38;chr1_1327211_C_T_b38;chr1_1327586_C_T_b38;chr1_1358907_C_A_b38;chr1_1359943_G_A_b38;chr1_1319063_G_A_b38
	1	1	1327586	rs307349	Inflammatory bowel disease	Brain_Cortex	MXRA8	0.91841	chr1_1327982_G_A_b38	rs4970433	2.928e-13	8.41652e-11	-0.0951	0.729126	A	A	3.46e-12	8.41652e-11	0.37123	5	chr1_1327982_G_A_b38;chr1_1327211_C_T_b38;chr1_1318756_G_A_b38;chr1_1358907_C_A_b38;chr1_1319063_G_A_b38
	1	1	1327586	rs307349	Inflammatory bowel disease	Brain_Hippocampus	MXRA8	0.908924	chr1_1358907_C_A_b38	rs12731385	2.928e-13	4.2743e-11	-0.0929	0.714989	A	A	5.886e-12	4.2743e-11	0.703078	7	chr1_1358907_C_A_b38;chr1_1381294_C_T_b38;chr1_1379664_G_A_b38;chr1_1376336_G_A_b38;chr1_1375595_C_T_b38;chr1_1385553_G_A_b38;chr1_1381268_C_T_b38
	1	1	1327586	rs307349	Inflammatory bowel disease	Pancreas	MXRA8	0.892371	chr1_1412488_C_CAG_b38	rs113466973	7.36e-13	6.29462e-07	0.1047	-0.273518	CAG	CAG	4.66e-12	2.28214e-06	0.115105	21	chr1_1412488_C_CAG_b38;chr1_1351517_G_C_b38;chr1_1351747_G_A_b38;chr1_1326444_G_C_b38;chr1_1345965_C_T_b38;chr1_1352542_G_A_b38;chr1_1399922_C_T_b38;chr1_1378635_C_T_b38;chr1_1381294_C_T_b38;chr1_1376153_G_C_b38;chr1_1411525_T_A_b38;chr1_1327764_G_A_b38;chr1_1380513_C_T_b38;chr1_1378865_C_T_b38;chr1_1381268_C_T_b38;chr1_1378792_C_T_b38;chr1_1379664_G_A_b38;chr1_1359138_C_T_b38;chr1_1354531_G_A_b3…
	1	1	1327586	rs307349	Inflammatory bowel disease	Nerve_Tibial	MXRA8	0.888106	chr1_1358907_C_A_b38	rs12731385	2.928e-13	5.91451e-14	-0.0929	0.261169	A	A	5.886e-12	5.91451e-14	0.804103	2	chr1_1358907_C_A_b38;chr1_1319063_G_A_b38
	1	1	1327586	rs307349	Inflammatory bowel disease	Brain_Cerebellar_Hemisphere	TAS1R3	0.971927	chr1_1327586_C_T_b38	rs307349	2.928e-13	1.22273e-06	-0.0989	-0.436372	T	T	2.928e-13	2.2022e-06	0.409628	13	chr1_1327586_C_T_b38;chr1_1326444_G_C_b38;chr1_1351517_G_C_b38;chr1_1351747_G_A_b38;chr1_1345965_C_T_b38;chr1_1352542_G_A_b38;chr1_1381294_C_T_b38;chr1_1385553_G_A_b38;chr1_1381268_C_T_b38;chr1_1318756_G_A_b38;chr1_1319063_G_A_b38;chr1_1327211_C_T_b38;chr1_1327982_G_A_b38
	1	1	1327586	rs307349	Inflammatory bowel disease	Artery_Aorta	TAS1R3	0.958753	chr1_1327586_C_T_b38	rs307349	2.928e-13	8.90831e-07	-0.0989	-0.453536	T	T	2.928e-13	1.885e-06	0.465963	17	chr1_1327586_C_T_b38;chr1_1345965_C_T_b38;chr1_1326444_G_C_b38;chr1_1351517_G_C_b38;chr1_1351747_G_A_b38;chr1_1327982_G_A_b38;chr1_1368047_ACT_A_b38;chr1_1353091_C_T_b38;chr1_1352542_G_A_b38;chr1_1379664_G_A_b38;chr1_1376336_G_A_b38;chr1_1375595_C_T_b38;chr1_1327211_C_T_b38;chr1_1376092_G_A_b38;chr1_1362042_C_T_b38;chr1_1380790_G_A_b38;chr1_1381294_C_T_b38
	1	1	1327586	rs307349	Inflammatory bowel disease	Brain_Cerebellum	TAS1R3	0.944626	chr1_1318756_G_A_b38	rs4970432	2.928e-13	1.61438e-08	-0.0956	-0.702929	A	A	2.588e-12	1.9328e-08	0.135055	16	chr1_1318756_G_A_b38;chr1_1327982_G_A_b38;chr1_1319063_G_A_b38;chr1_1351517_G_C_b38;chr1_1351747_G_A_b38;chr1_1327211_C_T_b38;chr1_1345965_C_T_b38;chr1_1326444_G_C_b38;chr1_1359138_C_T_b38;chr1_1352542_G_A_b38;chr1_1327586_C_T_b38;chr1_1358907_C_A_b38;chr1_1379664_G_A_b38;chr1_1354531_G_A_b38;chr1_1376336_G_A_b38;chr1_1375595_C_T_b38
	1	1	1327586	rs307349	Inflammatory bowel disease	Thyroid	TAS1R3	0.930984	chr1_1327764_G_A_b38	rs307350	2.928e-13	6.5112e-08	-0.0962	-0.365493	A	A	6.134e-12	6.5112e-08	0.130365	13	chr1_1327764_G_A_b38;chr1_1327982_G_A_b38;chr1_1345965_C_T_b38;chr1_1327586_C_T_b38;chr1_1351747_G_A_b38;chr1_1319063_G_A_b38;chr1_1351517_G_C_b38;chr1_1327211_C_T_b38;chr1_1358907_C_A_b38;chr1_1326444_G_C_b38;chr1_1318756_G_A_b38;chr1_1352542_G_A_b38;chr1_1354531_G_A_b38
	1	1	1327586	rs307349	Inflammatory bowel disease	Whole_Blood	TAS1R3	0.860699	chr1_1327211_C_T_b38	rs2296472	2.928e-13	3.92136e-17	-0.0943	-0.479421	T	T	5.126e-12	3.92136e-17	0.409691	5	chr1_1327211_C_T_b38;chr1_1327982_G_A_b38;chr1_1359943_G_A_b38;chr1_1368047_ACT_A_b38;chr1_1357369_C_T_b38
	1	1	1327586	rs307349	Inflammatory bowel disease	Thyroid	PUSL1	0.991467	chr1_1330125_G_A_b38	rs35946613	1.513e-11	1.65331e-09	-0.0637	0.258145	A	A	3.538e-11	1.65331e-09	0.374842	6	chr1_1330125_G_A_b38;chr1_1378204_G_C_b38;chr1_1389827_C_T_b38;chr1_1358384_G_C_b38;chr1_1376162_G_C_b38;chr1_1377431_C_T_b38
	1	1	1327586	rs307349	Inflammatory bowel disease	Testis	PUSL1	0.989524	chr1_1308516_C_T_b38	rs61766198	1.513e-11	2.16783e-11	-0.0652	0.397459	T	T	3.665e-11	2.16783e-11	0.545593	6	chr1_1308516_C_T_b38;chr1_1330125_G_A_b38;chr1_1389827_C_T_b38;chr1_1378204_G_C_b38;chr1_1376162_G_C_b38;chr1_1377431_C_T_b38
	1	1	1327586	rs307349	Inflammatory bowel disease	Nerve_Tibial	PUSL1	0.986559	chr1_1330125_G_A_b38	rs35946613	1.513e-11	1.32311e-09	-0.0637	0.227456	A	A	3.538e-11	1.32311e-09	0.674612	5	chr1_1330125_G_A_b38;chr1_1308516_C_T_b38;chr1_1378204_G_C_b38;chr1_1358384_G_C_b38;chr1_1376162_G_C_b38
	1	1	1327586	rs307349	Inflammatory bowel disease	Muscle_Skeletal	PUSL1	0.929826	chr1_1330125_G_A_b38	rs35946613	1.513e-11	2.82611e-09	-0.0637	0.206474	A	A	3.538e-11	4.25701e-09	0.758243	3	chr1_1330125_G_A_b38;chr1_1308516_C_T_b38;chr1_1358384_G_C_b38
	1	1	1327586	rs307349	Inflammatory bowel disease	Adipose_Subcutaneous	PUSL1	0.872213	chr1_1378204_G_C_b38	rs11489820	1.513e-11	3.90662e-09	-0.0649	0.198947	C	C	1.513e-11	1.2166e-07	0.664383	3	chr1_1378204_G_C_b38;chr1_1376162_G_C_b38;chr1_1377431_C_T_b38
	1	1	1327586	rs307349	Inflammatory bowel disease	Muscle_Skeletal	AURKAIP1	0.980309	chr1_1379664_G_A_b38	rs2368566	2.928e-13	2.11942e-09	-0.0941	0.141477	A	A	1.581e-12	5.53884e-09	0.210402	5	chr1_1379664_G_A_b38;chr1_1376336_G_A_b38;chr1_1375595_C_T_b38;chr1_1376092_G_A_b38;chr1_1380790_G_A_b38
	1	1	1327586	rs307349	Inflammatory bowel disease	Brain_Caudate_basal_ganglia	B3GALT6	0.883444	chr1_1216593_G_C_b38	rs75972122	1.854e-05	3.88587e-10	0.0485	-0.396817	C	C	1.854e-05	9.0073e-10	0.735152	2	chr1_1216593_G_C_b38;chr1_1228424_C_T_b38
	1	1	1327586	rs307349	Inflammatory bowel disease	Brain_Amygdala	B3GALT6	0.84994	chr1_1216593_G_C_b38	rs75972122	1.854e-05	3.05996e-07	0.0485	-0.386388	C	C	1.854e-05	4.68244e-07	0.798739	2	chr1_1216593_G_C_b38;chr1_1238231_G_A_b38
	1	1	1327586	rs307349	Inflammatory bowel disease	Brain_Anterior_cingulate_cortex_BA24	B3GALT6	0.791138	chr1_1308516_C_T_b38	rs61766198	3.538e-11	2.69449e-07	-0.0652	0.337385	T	T	3.665e-11	1.21858e-05	0.507656	2	chr1_1308516_C_T_b38;chr1_1330125_G_A_b38
	1	1	1327586	rs307349	Inflammatory bowel disease	Testis	VWA1	0.974482	chr1_1379664_G_A_b38	rs2368566	2.928e-13	6.95311e-07	-0.0941	-0.290263	A	A	1.581e-12	6.95311e-07	0.27201	10	chr1_1379664_G_A_b38;chr1_1376336_G_A_b38;chr1_1375595_C_T_b38;chr1_1376092_G_A_b38;chr1_1380790_G_A_b38;chr1_1381294_C_T_b38;chr1_1381268_C_T_b38;chr1_1327586_C_T_b38;chr1_1378635_C_T_b38;chr1_1376153_G_C_b38
	1	1	1327586	rs307349	Inflammatory bowel disease	Nerve_Tibial	TNFRSF18	0.825881	chr1_1188054_T_A_b38	rs12066716	1.854e-05	2.14007e-06	0.0463	-0.294845	A	A	3.049e-05	5.35587e-06	0.578224	3	chr1_1188054_T_A_b38;chr1_1216593_G_C_b38;chr1_1238231_G_A_b38
	1	1	1327586	rs307349	Inflammatory bowel disease	Pancreas	ATAD3A	0.922527	chr1_1359138_C_T_b38	rs34782209	8.81e-13	9.12639e-08	-0.0941	0.268251	T	T	3.933e-12	1.75524e-07	0.354336	11	chr1_1359138_C_T_b38;chr1_1376336_G_A_b38;chr1_1375595_C_T_b38;chr1_1376092_G_A_b38;chr1_1358907_C_A_b38;chr1_1327982_G_A_b38;chr1_1379664_G_A_b38;chr1_1381294_C_T_b38;chr1_1327211_C_T_b38;chr1_1381268_C_T_b38;chr1_1380790_G_A_b38
	1	1	1327586	rs307349	Inflammatory bowel disease	Thyroid	SSU72-AS1	0.896888	chr1_1557146_C_T_b38	rs4320726	1.537e-07	8.40611e-07	0.0975	-0.43018	T	T	1.537e-07	5.38855e-05	0.999381	1	chr1_1557146_C_T_b38
	1	1	1327586	rs307349	Inflammatory bowel disease	Lung	ATAD3C	0.994691	chr1_1468856_C_T_b38	rs1240730	4.647e-08	1.60007e-12	0.0747	0.361558	T	T	4.647e-08	6.41153e-12	0.505168	2	chr1_1468856_C_T_b38;chr1_1468094_G_C_b38
	1	1	1327586	rs307349	Inflammatory bowel disease	Breast_Mammary_Tissue	ATAD3C	0.985719	chr1_1378204_G_C_b38	rs11489820	1.513e-11	1.27571e-10	-0.0649	0.326915	C	C	1.513e-11	1.92054e-10	0.512392	4	chr1_1378204_G_C_b38;chr1_1388944_G_A_b38;chr1_1376162_G_C_b38;chr1_1377431_C_T_b38
	1	1	1327586	rs307349	Inflammatory bowel disease	Thyroid	ATAD3C	0.970298	chr1_1468856_C_T_b38	rs1240730	2.976e-09	2.55959e-24	0.0747	0.627225	T	T	4.647e-08	2.55959e-24	0.846684	2	chr1_1468856_C_T_b38;chr1_1468094_G_C_b38
	1	1	1327586	rs307349	Inflammatory bowel disease	Brain_Anterior_cingulate_cortex_BA24	ATAD3C	0.937615	chr1_1426261_C_T_b38	rs12030806	8.624e-11	4.52145e-08	0.0566	-0.495171	T	T	5.944e-10	1.62085e-07	0.588937	5	chr1_1426261_C_T_b38;chr1_1431537_G_C_b38;chr1_1453552_G_A_b38;chr1_1358384_G_C_b38;chr1_1455495_C_T_b38
	1	1	1327586	rs307349	Inflammatory bowel disease	Pituitary	ATAD3C	0.934357	chr1_1489916_C_T_b38	rs41285828	1.23e-07	1.76085e-09	0.0656	0.461324	T	T	1.23e-07	1.77701e-05	0.832681	3	chr1_1489916_C_T_b38;chr1_1547630_G_A_b38;chr1_1567715_G_A_b38
	1	1	1327586	rs307349	Inflammatory bowel disease	Brain_Cerebellum	ATAD3C	0.918438	chr1_1330125_G_A_b38	rs35946613	1.513e-11	4.29044e-08	-0.0637	0.470145	A	A	3.538e-11	5.12015e-07	0.303315	7	chr1_1330125_G_A_b38;chr1_1308516_C_T_b38;chr1_1431537_G_C_b38;chr1_1378204_G_C_b38;chr1_1389827_C_T_b38;chr1_1358384_G_C_b38;chr1_1426261_C_T_b38
	1	1	1327586	rs307349	Inflammatory bowel disease	Stomach	ATAD3C	0.831649	chr1_1378204_G_C_b38	rs11489820	1.513e-11	5.85591e-08	-0.0649	0.288145	C	C	1.513e-11	2.21891e-05	0.218763	5	chr1_1378204_G_C_b38;chr1_1330125_G_A_b38;chr1_1376162_G_C_b38;chr1_1377431_C_T_b38;chr1_1388944_G_A_b38
	1	1	1327586	rs307349	Inflammatory bowel disease	Testis	ATAD3C	0.775751	chr1_1426261_C_T_b38	rs12030806	5.944e-10	1.19645e-12	0.0566	-0.393757	T	T	5.944e-10	4.24211e-10	0.517977	2	chr1_1426261_C_T_b38;chr1_1431537_G_C_b38
	1	1	1327586	rs307349	Inflammatory bowel disease	Brain_Substantia_nigra	ATAD3C	0.760112	chr1_1431537_G_C_b38	rs873926	1.513e-11	1.41021e-15	0.0553	-0.759808	C	C	1.402e-09	1.41021e-15	0.999866	1	chr1_1431537_G_C_b38
	1	1	1327586	rs307349	Inflammatory bowel disease	Brain_Caudate_basal_ganglia	ATAD3C	0.75583	chr1_1431537_G_C_b38	rs873926	1.513e-11	5.52166e-14	0.0553	-0.578353	C	C	1.402e-09	5.52166e-14	0.998081	1	chr1_1431537_G_C_b38
	1	1	1327586	rs307349	Inflammatory bowel disease	Colon_Sigmoid	ATAD3C	0.753844	chr1_1431537_G_C_b38	rs873926	1.513e-11	4.57942e-13	0.0553	-0.442784	C	C	1.402e-09	4.57942e-13	0.916484	1	chr1_1431537_G_C_b38
	1	1	1327586	rs307349	Inflammatory bowel disease	Brain_Spinal_cord_cervical_c-1	ATAD3C	0.745399	chr1_1431537_G_C_b38	rs873926	1.513e-11	4.584e-17	0.0553	-0.892542	C	C	1.402e-09	4.584e-17	0.997029	1	chr1_1431537_G_C_b38
	1	1	1327586	rs307349	Inflammatory bowel disease	Brain_Putamen_basal_ganglia	ATAD3C	0.743464	chr1_1431537_G_C_b38	rs873926	1.513e-11	2.79904e-12	0.0553	-0.650285	C	C	1.402e-09	2.79904e-12	0.982267	1	chr1_1431537_G_C_b38
	1	1	1327586	rs307349	Inflammatory bowel disease	Muscle_Skeletal	CPTP	0.992743	chr1_1327586_C_T_b38	rs307349	2.928e-13	5.70648e-10	-0.0989	-0.15199	T	T	2.928e-13	5.70648e-10	0.949211	1	chr1_1327586_C_T_b38
	1	1	1327586	rs307349	Inflammatory bowel disease	Whole_Blood	CPTP	0.984636	chr1_1326444_G_C_b38	rs307348	2.928e-13	6.84498e-12	-0.0996	-0.164791	C	C	8.194e-13	6.84498e-12	0.549486	4	chr1_1326444_G_C_b38;chr1_1345965_C_T_b38;chr1_1351747_G_A_b38;chr1_1352542_G_A_b38
	1	1	1327586	rs307349	Inflammatory bowel disease	Testis	CPTP	0.980425	chr1_1327586_C_T_b38	rs307349	2.928e-13	7.06609e-08	-0.0989	-0.234315	T	T	2.928e-13	7.5748e-08	0.814555	4	chr1_1327586_C_T_b38;chr1_1327211_C_T_b38;chr1_1318756_G_A_b38;chr1_1327982_G_A_b38
	1	1	1327586	rs307349	Inflammatory bowel disease	Esophagus_Muscularis	CPTP	0.949834	chr1_1327211_C_T_b38	rs2296472	2.928e-13	3.06067e-09	-0.0943	-0.236302	T	T	5.126e-12	3.06067e-09	0.420064	5	chr1_1327211_C_T_b38;chr1_1327982_G_A_b38;chr1_1327586_C_T_b38;chr1_1319063_G_A_b38;chr1_1318756_G_A_b38
	1	1	1327586	rs307349	Inflammatory bowel disease	Cells_Cultured_fibroblasts	CPTP	0.94754	chr1_1319063_G_A_b38	rs1886772	2.928e-13	7.6725e-11	-0.0954	-0.274248	A	A	2.834e-12	7.6725e-11	0.749697	3	chr1_1319063_G_A_b38;chr1_1327586_C_T_b38;chr1_1318756_G_A_b38
	1	1	1327586	rs307349	Inflammatory bowel disease	Brain_Frontal_Cortex_BA9	ANKRD65-AS1	0.93275	chr1_1381294_C_T_b38	rs2649585	7.36e-13	2.72231e-08	-0.0954	0.685982	T	T	8.81e-13	4.76144e-07	0.0790653	22	chr1_1381294_C_T_b38;chr1_1378635_C_T_b38;chr1_1380513_C_T_b38;chr1_1376153_G_C_b38;chr1_1352542_G_A_b38;chr1_1354531_G_A_b38;chr1_1381268_C_T_b38;chr1_1378865_C_T_b38;chr1_1378792_C_T_b38;chr1_1351517_G_C_b38;chr1_1326444_G_C_b38;chr1_1351747_G_A_b38;chr1_1345965_C_T_b38;chr1_1358907_C_A_b38;chr1_1318756_G_A_b38;chr1_1353091_C_T_b38;chr1_1319063_G_A_b38;chr1_1412488_C_CAG_b38;chr1_1379664_G_A_b3…
	1	1	1327586	rs307349	Inflammatory bowel disease	Colon_Sigmoid	ANKRD65-AS1	0.8725	chr1_1422081_C_T_b38	rs1781134	7.36e-13	6.65773e-10	0.0895	-0.636009	T	T	6.425e-12	8.24364e-10	0.210731	11	chr1_1422081_C_T_b38;chr1_1399922_C_T_b38;chr1_1385384_G_A_b38;chr1_1383798_AG_A_b38;chr1_1380513_C_T_b38;chr1_1378635_C_T_b38;chr1_1376153_G_C_b38;chr1_1395050_G_A_b38;chr1_1378865_C_T_b38;chr1_1378792_C_T_b38;chr1_1359138_C_T_b38
	1	1	1327586	rs307349	Inflammatory bowel disease	Esophagus_Gastroesophageal_Junction	ANKRD65-AS1	0.751952	chr1_1412488_C_CAG_b38	rs113466973	8.141e-13	1.34132e-09	0.1047	-0.524353	CAG	CAG	4.66e-12	3.98383e-08	0.215398	8	chr1_1412488_C_CAG_b38;chr1_1422081_C_T_b38;chr1_1408286_G_A_b38;chr1_1399922_C_T_b38;chr1_1395050_G_A_b38;chr1_1385384_G_A_b38;chr1_1380513_C_T_b38;chr1_1415221_G_T_b38
	1	1	1327586	rs307349	Inflammatory bowel disease	Nerve_Tibial	ENSG00000228327.3	0.848887	chr1_1345965_C_T_b38	rs307357	9.965e-13	6.89866e-07	-0.0993	0.295266	T	T	9.965e-13	0.000133789	0.249369	6	chr1_1345965_C_T_b38;chr1_1378635_C_T_b38;chr1_1376153_G_C_b38;chr1_1378865_C_T_b38;chr1_1380513_C_T_b38;chr1_1378792_C_T_b38
	1	1	1327586	rs307349	Inflammatory bowel disease	Esophagus_Muscularis	LINC01786	0.802336	chr1_1283510_G_C_b38	rs7519699	0.0001693	8.76373e-07	0.0788	0.353134	C	C	0.0001717	8.76373e-07	0.288863	8	chr1_1283510_G_C_b38;chr1_1280332_C_T_b38;chr1_1270963_C_A_b38;chr1_1282954_G_A_b38;chr1_1280878_G_A_b38;chr1_1279162_G_A_b38;chr1_1283472_G_T_b38;chr1_1278773_G_A_b38
	1	1	1327586	rs307349	Inflammatory bowel disease	Brain_Substantia_nigra	ANKRD65	0.951388	chr1_1351517_G_C_b38	rs34380086	2.928e-13	1.00217e-07	-0.0998	0.655573	C	C	7.36e-13	4.56631e-07	0.143409	17	chr1_1351517_G_C_b38;chr1_1326444_G_C_b38;chr1_1351747_G_A_b38;chr1_1345965_C_T_b38;chr1_1362042_C_T_b38;chr1_1399922_C_T_b38;chr1_1385553_G_A_b38;chr1_1352542_G_A_b38;chr1_1380513_C_T_b38;chr1_1327586_C_T_b38;chr1_1385384_G_A_b38;chr1_1378635_C_T_b38;chr1_1376153_G_C_b38;chr1_1327764_G_A_b38;chr1_1354531_G_A_b38;chr1_1378865_C_T_b38;chr1_1378792_C_T_b38
	1	1	1327586	rs307349	Inflammatory bowel disease	Brain_Spinal_cord_cervical_c-1	ANKRD65	0.944375	chr1_1399922_C_T_b38	rs1240707	2.318e-12	9.95329e-11	0.0936	-0.761822	T	T	5.673e-12	3.97539e-10	0.276306	5	chr1_1399922_C_T_b38;chr1_1383798_AG_A_b38;chr1_1385384_G_A_b38;chr1_1395050_G_A_b38;chr1_1408286_G_A_b38
	1	1	1327586	rs307349	Inflammatory bowel disease	Brain_Hippocampus	ANKRD65	0.880094	chr1_1354531_G_A_b38	rs4970365	2.928e-13	9.79489e-16	-0.0968	0.817192	A	A	2.62e-12	9.88316e-16	0.311158	6	chr1_1354531_G_A_b38;chr1_1378635_C_T_b38;chr1_1376153_G_C_b38;chr1_1378865_C_T_b38;chr1_1378792_C_T_b38;chr1_1380513_C_T_b38
	1	1	1327586	rs307349	Inflammatory bowel disease	Minor_Salivary_Gland	ANKRD65	0.859183	chr1_1327982_G_A_b38	rs4970433	7.36e-13	1.28893e-08	-0.0951	0.790058	A	A	3.46e-12	3.34335e-08	0.195403	11	chr1_1327982_G_A_b38;chr1_1399922_C_T_b38;chr1_1359138_C_T_b38;chr1_1327211_C_T_b38;chr1_1358907_C_A_b38;chr1_1415221_G_T_b38;chr1_1422081_C_T_b38;chr1_1412488_C_CAG_b38;chr1_1415659_G_C_b38;chr1_1357369_C_T_b38;chr1_1359943_G_A_b38
	1	1	1327586	rs307349	Inflammatory bowel disease	Prostate	ANKRD65	0.844135	chr1_1422081_C_T_b38	rs1781134	8.81e-13	8.49397e-11	0.0895	-0.54337	T	T	6.425e-12	5.27255e-10	0.733841	2	chr1_1422081_C_T_b38;chr1_1408286_G_A_b38
	1	1	1327586	rs307349	Inflammatory bowel disease	Pancreas	ANKRD65	0.800198	chr1_1380513_C_T_b38	rs2454652	2.928e-13	4.6022e-13	-0.0948	0.715117	T	T	2.318e-12	5.01081e-12	0.241024	5	chr1_1380513_C_T_b38;chr1_1378635_C_T_b38;chr1_1376153_G_C_b38;chr1_1378865_C_T_b38;chr1_1378792_C_T_b38
	1	1	1327586	rs307349	Inflammatory bowel disease	Skin_Sun_Exposed_Lower_leg	ENSG00000240731.1	0.968576	chr1_1351517_G_C_b38	rs34380086	2.928e-13	1.54541e-07	-0.0998	-0.284324	C	C	7.36e-13	1.54541e-07	0.259161	15	chr1_1351517_G_C_b38;chr1_1352542_G_A_b38;chr1_1345965_C_T_b38;chr1_1351747_G_A_b38;chr1_1326444_G_C_b38;chr1_1381294_C_T_b38;chr1_1327586_C_T_b38;chr1_1380790_G_A_b38;chr1_1353091_C_T_b38;chr1_1381268_C_T_b38;chr1_1385553_G_A_b38;chr1_1354531_G_A_b38;chr1_1362042_C_T_b38;chr1_1379664_G_A_b38;chr1_1376336_G_A_b38
	1	1	1327586	rs307349	Inflammatory bowel disease	Nerve_Tibial	ENSG00000240731.1	0.966535	chr1_1327586_C_T_b38	rs307349	2.928e-13	2.72424e-09	-0.0989	-0.269195	T	T	2.928e-13	1.14834e-08	0.400291	9	chr1_1327586_C_T_b38;chr1_1318756_G_A_b38;chr1_1319063_G_A_b38;chr1_1381294_C_T_b38;chr1_1381268_C_T_b38;chr1_1385553_G_A_b38;chr1_1380790_G_A_b38;chr1_1422081_C_T_b38;chr1_1379664_G_A_b38
	1	1	1327586	rs307349	Inflammatory bowel disease	Liver	MRPL20	0.903314	chr1_1389827_C_T_b38	rs1240748	1.513e-11	1.77533e-09	-0.065	-0.293234	T	T	2.144e-11	1.61148e-08	0.456817	4	chr1_1389827_C_T_b38;chr1_1388944_G_A_b38;chr1_1378204_G_C_b38;chr1_1376162_G_C_b38
	1	1	1327586	rs307349	Inflammatory bowel disease	Esophagus_Muscularis	MRPL20-DT	0.966054	chr1_1362042_C_T_b38	rs2765021	7.36e-13	4.79141e-07	-0.0968	0.280968	T	T	3.823e-12	4.79141e-07	0.413898	8	chr1_1362042_C_T_b38;chr1_1351517_G_C_b38;chr1_1351747_G_A_b38;chr1_1352542_G_A_b38;chr1_1345965_C_T_b38;chr1_1363157_C_T_b38;chr1_1363031_C_T_b38;chr1_1326444_G_C_b38
	1	1	1327586	rs307349	Inflammatory bowel disease	Pancreas	MRPL20-DT	0.960007	chr1_1380513_C_T_b38	rs2454652	7.36e-13	5.49748e-07	-0.0948	0.410016	T	T	2.318e-12	8.4527e-07	0.129545	15	chr1_1380513_C_T_b38;chr1_1378635_C_T_b38;chr1_1376153_G_C_b38;chr1_1326444_G_C_b38;chr1_1378865_C_T_b38;chr1_1378792_C_T_b38;chr1_1362042_C_T_b38;chr1_1351517_G_C_b38;chr1_1383798_AG_A_b38;chr1_1351747_G_A_b38;chr1_1345965_C_T_b38;chr1_1399922_C_T_b38;chr1_1363157_C_T_b38;chr1_1352542_G_A_b38;chr1_1363031_C_T_b38
	1	1	1327586	rs307349	Inflammatory bowel disease	Colon_Transverse	MRPL20-DT	0.927825	chr1_1380513_C_T_b38	rs2454652	7.36e-13	8.09033e-09	-0.0948	0.378336	T	T	2.318e-12	2.30684e-08	0.145087	12	chr1_1380513_C_T_b38;chr1_1351747_G_A_b38;chr1_1345965_C_T_b38;chr1_1326444_G_C_b38;chr1_1352542_G_A_b38;chr1_1351517_G_C_b38;chr1_1383798_AG_A_b38;chr1_1354531_G_A_b38;chr1_1378635_C_T_b38;chr1_1376153_G_C_b38;chr1_1378865_C_T_b38;chr1_1378792_C_T_b38
	1	1	1327586	rs307349	Inflammatory bowel disease	Skin_Sun_Exposed_Lower_leg	MRPL20-DT	0.926998	chr1_1380513_C_T_b38	rs2454652	7.36e-13	5.90007e-09	-0.0948	0.301222	T	T	2.318e-12	1.4794e-08	0.250952	7	chr1_1380513_C_T_b38;chr1_1399922_C_T_b38;chr1_1378635_C_T_b38;chr1_1376153_G_C_b38;chr1_1395050_G_A_b38;chr1_1378865_C_T_b38;chr1_1378792_C_T_b38
	1	1	1327586	rs307349	Inflammatory bowel disease	Spleen	MRPL20-DT	0.919775	chr1_1383798_AG_A_b38	rs34500387	7.36e-13	2.76664e-08	-0.092	0.556583	A	A	7.186e-12	2.76664e-08	0.31589	14	chr1_1383798_AG_A_b38;chr1_1378635_C_T_b38;chr1_1376153_G_C_b38;chr1_1378865_C_T_b38;chr1_1378792_C_T_b38;chr1_1380513_C_T_b38;chr1_1385384_G_A_b38;chr1_1385553_G_A_b38;chr1_1354531_G_A_b38;chr1_1351517_G_C_b38;chr1_1326444_G_C_b38;chr1_1351747_G_A_b38;chr1_1345965_C_T_b38;chr1_1352542_G_A_b38
	1	1	1327586	rs307349	Inflammatory bowel disease	Skin_Not_Sun_Exposed_Suprapubic	MRPL20-DT	0.887384	chr1_1422081_C_T_b38	rs1781134	7.36e-13	2.49137e-08	0.0895	-0.35342	T	T	6.425e-12	2.49137e-08	0.44422	10	chr1_1422081_C_T_b38;chr1_1354531_G_A_b38;chr1_1412488_C_CAG_b38;chr1_1352542_G_A_b38;chr1_1351747_G_A_b38;chr1_1345965_C_T_b38;chr1_1351517_G_C_b38;chr1_1326444_G_C_b38;chr1_1415221_G_T_b38;chr1_1380513_C_T_b38
	1	1	1327586	rs307349	Inflammatory bowel disease	Artery_Aorta	MRPL20-DT	0.791252	chr1_1378635_C_T_b38	rs2649588	2.928e-13	1.12921e-15	-0.0939	0.489912	T	T	2.403e-12	1.61083e-14	0.194708	5	chr1_1378635_C_T_b38;chr1_1376153_G_C_b38;chr1_1378865_C_T_b38;chr1_1378792_C_T_b38;chr1_1380513_C_T_b38
	2	1	2455297	rs35608674	Cirrhosis	Skin_Sun_Exposed_Lower_leg	MMEL1	0.830206	chr1_2512975_G_A_b38	rs7535528	1.515e-05	4.45567e-06	-0.0322	0.197956	A	A	1.515e-05	1.5595e-05	0.203874	10	chr1_2512975_G_A_b38;chr1_2806780_C_T_b38;chr1_2811239_C_T_b38;chr1_2812156_C_T_b38;chr1_2806649_C_A_b38;chr1_2811073_G_A_b38;chr1_2806283_C_T_b38;chr1_2496273_C_T_b38;chr1_2821700_C_T_b38;chr1_2833151_G_T_b38
	2	1	2455297	rs35608674	Cirrhosis	Spleen	ENSG00000228037.1	0.931952	chr1_2806780_C_T_b38	rs4648360	1.515e-05	8.89505e-14	-0.0293	0.560292	T	T	3.09e-05	8.89505e-14	0.941903	1	chr1_2806780_C_T_b38
	2	1	2455297	rs35608674	Cirrhosis	Cells_EBV-transformed_lymphocytes	ENSG00000283259.1	0.854947	chr1_2806649_C_A_b38	rs4648450	2.114e-05	7.64678e-11	-0.0289	-0.535843	A	A	6.179e-05	7.64678e-11	0.75249	2	chr1_2806649_C_A_b38;chr1_2642464_C_T_b38
	3	1	8108857	rs4325151	Inflammatory bowel disease	Adipose_Visceral_Omentum	VAMP3	0.922742	chr1_7771004_C_A_b38	rs707457	1.82e-07	3.6417e-07	-0.0564	-0.162999	A	A	1.82e-07	1.67502e-05	0.881558	1	chr1_7771004_C_A_b38
	3	1	8108857	rs4325151	Inflammatory bowel disease	Whole_Blood	VAMP3	0.789849	chr1_7774472_G_C_b38	rs1776352	6.509e-06	1.8705e-26	-0.0317	0.15597	C	C	0.0001703	1.8705e-26	0.99978	1	chr1_7774472_G_C_b38
	3	1	8108857	rs4325151	Inflammatory bowel disease	Heart_Left_Ventricle	PARK7	0.963975	chr1_8020685_C_T_b38	rs404381	2.124e-15	6.07659e-14	-0.0776	0.200488	T	T	3e-15	6.07659e-14	0.774353	7	chr1_8020685_C_T_b38;chr1_7986318_C_T_b38;chr1_7973777_G_A_b38;chr1_8094061_TG_T_b38;chr1_7999276_C_CA_b38;chr1_8019241_C_T_b38;chr1_8011758_GAA_G_b38
	3	1	8108857	rs4325151	Inflammatory bowel disease	Brain_Cerebellum	PARK7	0.918608	chr1_8108857_T_A_b38	rs4325151	2.124e-15	7.85315e-07	0.0784	0.248294	A	A	2.124e-15	1.30641e-05	0.258529	9	chr1_8108857_T_A_b38;chr1_8105915_G_C_b38;chr1_8108201_T_A_b38;chr1_8105607_T_A_b38;chr1_8108933_C_T_b38;chr1_8104074_G_A_b38;chr1_8075956_G_A_b38;chr1_7986318_C_T_b38;chr1_8087638_C_T_b38
	3	1	8108857	rs4325151	Inflammatory bowel disease	Ovary	PARK7	0.868727	chr1_7997387_G_A_b38	rs12087103	9.353e-06	2.872e-07	0.0322	0.208945	A	A	0.0001008	2.872e-07	0.216492	10	chr1_7997387_G_A_b38;chr1_8003468_G_A_b38;chr1_8034794_C_T_b38;chr1_8034208_C_A_b38;chr1_8034581_G_A_b38;chr1_8071697_C_T_b38;chr1_8067856_C_T_b38;chr1_8059995_C_T_b38;chr1_8045039_C_T_b38;chr1_8045115_G_T_b38
	3	1	8108857	rs4325151	Inflammatory bowel disease	Skin_Sun_Exposed_Lower_leg	PARK7	0.852901	chr1_8020685_C_T_b38	rs404381	2.124e-15	3.96273e-18	-0.0776	0.163194	T	T	3e-15	2.6597e-17	0.99962	1	chr1_8020685_C_T_b38
	3	1	8108857	rs4325151	Inflammatory bowel disease	Cells_Cultured_fibroblasts	SLC45A1	0.816805	chr1_8208853_C_T_b38	rs6687168	2.728e-08	9.20539e-06	-0.0506	-0.106048	T	T	2.728e-08	0.000166878	0.549467	2	chr1_8208853_C_T_b38;chr1_8212171_G_A_b38
	3	1	8108857	rs4325151	Inflammatory bowel disease	Lung	CAMTA1	0.876458	chr1_7732351_C_T_b38	rs2301488	1.478e-05	4.44334e-13	-0.0321	0.167788	T	T	8.386e-05	4.44334e-13	0.989051	1	chr1_7732351_C_T_b38
	3	1	8108857	rs4325151	Inflammatory bowel disease	Brain_Hippocampus	ERRFI1-DT	0.936918	chr1_8034794_C_T_b38	rs11121070	9.353e-06	7.63231e-13	0.0336	0.690767	T	T	4.571e-05	7.63231e-13	0.21241	8	chr1_8034794_C_T_b38;chr1_8034208_C_A_b38;chr1_8071697_C_T_b38;chr1_8067856_C_T_b38;chr1_8059995_C_T_b38;chr1_8045039_C_T_b38;chr1_8045115_G_T_b38;chr1_8056625_C_T_b38
	3	1	8108857	rs4325151	Inflammatory bowel disease	Esophagus_Muscularis	ERRFI1-DT	0.925996	chr1_8122475_G_T_b38	rs6577466	4.571e-05	3.70284e-10	-0.0335	-0.257909	T	T	5.414e-05	3.70284e-10	0.488218	2	chr1_8122475_G_T_b38;chr1_8122528_T_A_b38
	3	1	8108857	rs4325151	Inflammatory bowel disease	Brain_Spinal_cord_cervical_c-1	ERRFI1-DT	0.91873	chr1_8034581_G_A_b38	rs11577776	9.353e-06	5.06348e-13	0.034	0.894943	A	A	4.949e-05	5.06348e-13	0.280165	8	chr1_8034581_G_A_b38;chr1_8038402_G_A_b38;chr1_8071697_C_T_b38;chr1_8067856_C_T_b38;chr1_8059995_C_T_b38;chr1_8045039_C_T_b38;chr1_8045115_G_T_b38;chr1_8056625_C_T_b38
	3	1	8108857	rs4325151	Inflammatory bowel disease	Brain_Frontal_Cortex_BA9	ERRFI1-DT	0.918375	chr1_8034581_G_A_b38	rs11577776	9.353e-06	9.0463e-13	0.034	0.692263	A	A	4.949e-05	9.0463e-13	0.303734	9	chr1_8034581_G_A_b38;chr1_8071697_C_T_b38;chr1_8067856_C_T_b38;chr1_8059995_C_T_b38;chr1_8045039_C_T_b38;chr1_8045115_G_T_b38;chr1_8056625_C_T_b38;chr1_8081653_G_A_b38;chr1_8064255_C_A_b38
	3	1	8108857	rs4325151	Inflammatory bowel disease	Nerve_Tibial	ERRFI1-DT	0.917865	chr1_8071697_C_T_b38	rs6682378	9.353e-06	1.58644e-09	0.0369	0.279295	T	T	9.353e-06	3.197e-09	0.123159	19	chr1_8071697_C_T_b38;chr1_8067856_C_T_b38;chr1_8059995_C_T_b38;chr1_8045039_C_T_b38;chr1_8045115_G_T_b38;chr1_8056625_C_T_b38;chr1_8034581_G_A_b38;chr1_8123500_G_A_b38;chr1_8094229_G_A_b38;chr1_8122475_G_T_b38;chr1_8122528_T_A_b38;chr1_8092819_G_A_b38;chr1_8099286_TAA_T_b38;chr1_8038402_G_A_b38;chr1_8094487_G_A_b38;chr1_8003881_GA_G_b38;chr1_8007774_G_A_b38;chr1_8105032_G_A_b38;chr1_8110594_C_T_b…
	3	1	8108857	rs4325151	Inflammatory bowel disease	Artery_Aorta	ERRFI1-DT	0.917505	chr1_8122475_G_T_b38	rs6577466	4.571e-05	1.76708e-08	-0.0335	-0.256366	T	T	5.414e-05	1.76708e-08	0.478151	2	chr1_8122475_G_T_b38;chr1_8122528_T_A_b38
	3	1	8108857	rs4325151	Inflammatory bowel disease	Brain_Cerebellum	ERRFI1-DT	0.914865	chr1_8071697_C_T_b38	rs6682378	9.353e-06	8.05401e-08	0.0369	0.41642	T	T	9.353e-06	3.40294e-07	0.123981	19	chr1_8071697_C_T_b38;chr1_8067856_C_T_b38;chr1_8059995_C_T_b38;chr1_8045039_C_T_b38;chr1_8045115_G_T_b38;chr1_8056625_C_T_b38;chr1_8038402_G_A_b38;chr1_8124247_G_C_b38;chr1_8124435_G_C_b38;chr1_8123500_G_A_b38;chr1_8081653_G_A_b38;chr1_8064255_C_A_b38;chr1_7982676_G_A_b38;chr1_7985775_C_A_b38;chr1_8125583_C_T_b38;chr1_8001603_C_T_b38;chr1_8002328_C_A_b38;chr1_8125596_G_A_b38;chr1_8115887_C_T_b38
	3	1	8108857	rs4325151	Inflammatory bowel disease	Brain_Putamen_basal_ganglia	ERRFI1-DT	0.911862	chr1_8034581_G_A_b38	rs11577776	9.353e-06	1.73864e-10	0.034	0.691787	A	A	4.949e-05	1.73864e-10	0.210554	12	chr1_8034581_G_A_b38;chr1_8071697_C_T_b38;chr1_8067856_C_T_b38;chr1_8059995_C_T_b38;chr1_8045039_C_T_b38;chr1_8045115_G_T_b38;chr1_8056625_C_T_b38;chr1_8016025_G_T_b38;chr1_8008484_C_T_b38;chr1_8012406_C_T_b38;chr1_8001982_C_T_b38;chr1_8001713_G_A_b38
	3	1	8108857	rs4325151	Inflammatory bowel disease	Brain_Caudate_basal_ganglia	ERRFI1-DT	0.89419	chr1_8071697_C_T_b38	rs6682378	9.353e-06	5.48101e-08	0.0369	0.506221	T	T	9.353e-06	1.95902e-07	0.103081	23	chr1_8071697_C_T_b38;chr1_8067856_C_T_b38;chr1_8059995_C_T_b38;chr1_8045039_C_T_b38;chr1_8045115_G_T_b38;chr1_8056625_C_T_b38;chr1_8124435_G_C_b38;chr1_8124247_G_C_b38;chr1_8081653_G_A_b38;chr1_8001982_C_T_b38;chr1_8016025_G_T_b38;chr1_7986774_G_A_b38;chr1_8001713_G_A_b38;chr1_7977436_G_A_b38;chr1_7994233_G_T_b38;chr1_8008484_C_T_b38;chr1_7993605_C_T_b38;chr1_8064255_C_A_b38;chr1_8012406_C_T_b38;…
	3	1	8108857	rs4325151	Inflammatory bowel disease	Lung	ERRFI1-DT	0.884795	chr1_8071697_C_T_b38	rs6682378	9.353e-06	1.70263e-07	0.0369	0.257221	T	T	9.353e-06	1.63127e-06	0.0782516	16	chr1_8071697_C_T_b38;chr1_7977436_G_A_b38;chr1_8067856_C_T_b38;chr1_7986287_C_T_b38;chr1_7986774_G_A_b38;chr1_8059995_C_T_b38;chr1_8045039_C_T_b38;chr1_8045115_G_T_b38;chr1_8056625_C_T_b38;chr1_8001982_C_T_b38;chr1_8001713_G_A_b38;chr1_7994233_G_T_b38;chr1_7993605_C_T_b38;chr1_8034794_C_T_b38;chr1_8034208_C_A_b38;chr1_8016025_G_T_b38
	3	1	8108857	rs4325151	Inflammatory bowel disease	Brain_Nucleus_accumbens_basal_ganglia	ERRFI1-DT	0.88208	chr1_8034581_G_A_b38	rs11577776	9.353e-06	4.33302e-07	0.034	0.515839	A	A	4.949e-05	4.33302e-07	0.116609	18	chr1_8034581_G_A_b38;chr1_8001603_C_T_b38;chr1_8002328_C_A_b38;chr1_8071697_C_T_b38;chr1_7982676_G_A_b38;chr1_8067856_C_T_b38;chr1_7985775_C_A_b38;chr1_8003881_GA_G_b38;chr1_8007774_G_A_b38;chr1_8059995_C_T_b38;chr1_8045039_C_T_b38;chr1_8045115_G_T_b38;chr1_8056625_C_T_b38;chr1_8024153_C_T_b38;chr1_7997387_G_A_b38;chr1_8038402_G_A_b38;chr1_8001982_C_T_b38;chr1_8001713_G_A_b38
	3	1	8108857	rs4325151	Inflammatory bowel disease	Brain_Cerebellar_Hemisphere	ERRFI1-DT	0.878681	chr1_8071697_C_T_b38	rs6682378	9.353e-06	5.89167e-07	0.0369	0.419631	T	T	9.353e-06	4.96985e-06	0.0699848	20	chr1_8071697_C_T_b38;chr1_8067856_C_T_b38;chr1_7986774_G_A_b38;chr1_8059995_C_T_b38;chr1_8001982_C_T_b38;chr1_8045039_C_T_b38;chr1_8045115_G_T_b38;chr1_8056625_C_T_b38;chr1_8001713_G_A_b38;chr1_8001603_C_T_b38;chr1_8002328_C_A_b38;chr1_7994233_G_T_b38;chr1_8034581_G_A_b38;chr1_7993605_C_T_b38;chr1_7982676_G_A_b38;chr1_7985775_C_A_b38;chr1_8003881_GA_G_b38;chr1_7986287_C_T_b38;chr1_8007774_G_A_b38…
	3	1	8108857	rs4325151	Inflammatory bowel disease	Brain_Cortex	ERRFI1-DT	0.847838	chr1_8034581_G_A_b38	rs11577776	9.353e-06	9.58405e-13	0.034	0.673086	A	A	4.949e-05	9.58405e-13	0.194523	15	chr1_8034581_G_A_b38;chr1_7982676_G_A_b38;chr1_7985775_C_A_b38;chr1_7977436_G_A_b38;chr1_7986774_G_A_b38;chr1_8003881_GA_G_b38;chr1_8016025_G_T_b38;chr1_8007774_G_A_b38;chr1_8001982_C_T_b38;chr1_8008484_C_T_b38;chr1_8001713_G_A_b38;chr1_8001603_C_T_b38;chr1_8002328_C_A_b38;chr1_8012406_C_T_b38;chr1_7994233_G_T_b38
	3	1	8108857	rs4325151	Inflammatory bowel disease	Brain_Hypothalamus	ERRFI1-DT	0.843959	chr1_8034581_G_A_b38	rs11577776	9.353e-06	4.00988e-11	0.034	0.686608	A	A	4.949e-05	4.00988e-11	0.2031	15	chr1_8034581_G_A_b38;chr1_8016025_G_T_b38;chr1_7986774_G_A_b38;chr1_7977436_G_A_b38;chr1_8008484_C_T_b38;chr1_8012406_C_T_b38;chr1_8001982_C_T_b38;chr1_8001713_G_A_b38;chr1_7994233_G_T_b38;chr1_7982676_G_A_b38;chr1_7993605_C_T_b38;chr1_7985775_C_A_b38;chr1_8003881_GA_G_b38;chr1_8003468_G_A_b38;chr1_8007774_G_A_b38
	3	1	8108857	rs4325151	Inflammatory bowel disease	Brain_Anterior_cingulate_cortex_BA24	ERRFI1-DT	0.840109	chr1_7986287_C_T_b38	rs498594	9.353e-06	5.32506e-11	0.0329	0.695509	T	T	8.163e-05	5.32506e-11	0.0998003	12	chr1_7986287_C_T_b38;chr1_7977436_G_A_b38;chr1_7986774_G_A_b38;chr1_8001982_C_T_b38;chr1_8001713_G_A_b38;chr1_7994233_G_T_b38;chr1_7993605_C_T_b38;chr1_8016025_G_T_b38;chr1_8008484_C_T_b38;chr1_8012406_C_T_b38;chr1_7982676_G_A_b38;chr1_7985775_C_A_b38
	3	1	8108857	rs4325151	Inflammatory bowel disease	Adipose_Visceral_Omentum	ERRFI1-DT	0.826538	chr1_7997387_G_A_b38	rs12087103	9.353e-06	9.87989e-10	0.0322	0.340477	A	A	0.0001008	1.00478e-09	0.247677	8	chr1_7997387_G_A_b38;chr1_8003468_G_A_b38;chr1_7982676_G_A_b38;chr1_7985775_C_A_b38;chr1_8024153_C_T_b38;chr1_8001603_C_T_b38;chr1_8002328_C_A_b38;chr1_8003881_GA_G_b38
	3	1	8108857	rs4325151	Inflammatory bowel disease	Thyroid	ERRFI1-DT	0.814798	chr1_8020685_C_T_b38	rs404381	3e-15	2.08074e-06	-0.0776	-0.166865	T	T	3e-15	9.26641e-05	1	1	chr1_8020685_C_T_b38
	3	1	8108857	rs4325151	Inflammatory bowel disease	Esophagus_Gastroesophageal_Junction	ENSG00000269925.1	0.850713	chr1_7772152_C_T_b38	rs707458	1.478e-05	2.72053e-07	-0.0356	-0.230422	T	T	1.478e-05	1.3492e-06	0.694409	2	chr1_7772152_C_T_b38;chr1_7774472_G_C_b38
	6	1	11162336	rs7553827	Dupuytren's disease	Skin_Not_Sun_Exposed_Suprapubic	MASP2	0.884925	chr1_11044313_C_T_b38	rs3765900	2.374e-11	1.95409e-06	-0.0808	-0.0978782	T	T	6.044e-11	1.71559e-05	0.363261	5	chr1_11044313_C_T_b38;chr1_11064886_G_A_b38;chr1_11039731_G_A_b38;chr1_11067258_C_T_b38;chr1_11043910_G_A_b38
	6	1	11162336	rs7553827	Dupuytren's disease	Skin_Sun_Exposed_Lower_leg	SRM	0.988156	chr1_11039731_G_A_b38	rs12136468	6.044e-11	5.30052e-07	-0.0875	-0.10975	A	A	1.055e-10	6.32653e-07	0.63393	4	chr1_11039731_G_A_b38;chr1_11044619_G_A_b38;chr1_11044313_C_T_b38;chr1_11045049_C_T_b38
	6	1	11162336	rs7553827	Dupuytren's disease	Nerve_Tibial	SRM	0.983974	chr1_11169458_G_A_b38	rs11121695	5.07e-16	1.62814e-06	0.0963	-0.144435	A	A	1.037e-15	1.62814e-06	0.643897	4	chr1_11169458_G_A_b38;chr1_11119427_C_T_b38;chr1_11121270_C_T_b38;chr1_11173757_G_A_b38
	6	1	11162336	rs7553827	Dupuytren's disease	Nerve_Tibial	ANGPTL7	0.994112	chr1_11173757_G_A_b38	rs11585553	5.07e-16	2.3652e-26	0.0973	-0.456971	A	A	1.107e-15	2.3652e-26	0.999919	1	chr1_11173757_G_A_b38
	6	1	11162336	rs7553827	Dupuytren's disease	Pituitary	EXOSC10	0.951634	chr1_11064886_G_A_b38	rs2486921	2.374e-11	1.55644e-05	-0.0848	-0.248294	A	A	2.374e-11	3.7977e-05	0.701252	2	chr1_11064886_G_A_b38;chr1_11067258_C_T_b38
	6	1	11162336	rs7553827	Dupuytren's disease	Colon_Transverse	EXOSC10	0.90545	chr1_11189075_G_C_b38	rs1034528	2.037e-14	3.28593e-07	0.0885	0.229374	C	C	2.037e-14	2.44277e-06	0.991592	1	chr1_11189075_G_C_b38
	6	1	11162336	rs7553827	Dupuytren's disease	Testis	EXOSC10	0.707784	chr1_11189075_G_C_b38	rs1034528	2.037e-14	2.33324e-08	0.0885	0.233337	C	C	2.037e-14	5.08603e-06	0.996976	1	chr1_11189075_G_C_b38
	6	1	11162336	rs7553827	Dupuytren's disease	Skin_Sun_Exposed_Lower_leg	MTOR	0.929129	chr1_11119427_C_T_b38	rs56803472	5.07e-16	1.54144e-06	0.0968	0.108786	T	T	5.07e-16	6.36914e-06	0.443063	5	chr1_11119427_C_T_b38;chr1_11121270_C_T_b38;chr1_11176353_C_A_b38;chr1_11130589_G_A_b38;chr1_11173757_G_A_b38
	6	1	11162336	rs7553827	Dupuytren's disease	Artery_Tibial	MTOR	0.898598	chr1_11304958_G_A_b38	rs2744820	2.562e-10	3.56085e-06	0.073	0.0761643	A	A	2.562e-10	6.73001e-05	0.638403	16	chr1_11304958_G_A_b38;chr1_11244249_G_A_b38;chr1_11226815_G_T_b38;chr1_11247196_G_C_b38;chr1_11207226_C_T_b38;chr1_11210114_C_T_b38;chr1_11218756_G_C_b38;chr1_11262571_G_T_b38;chr1_11242008_G_A_b38;chr1_11206654_C_T_b38;chr1_11206335_G_C_b38;chr1_11245259_G_A_b38;chr1_11228291_G_C_b38;chr1_11228576_G_C_b38;chr1_11228561_G_A_b38;chr1_11224034_G_A_b38
	6	1	11162336	rs7553827	Dupuytren's disease	Esophagus_Mucosa	MTOR	0.73366	chr1_11119427_C_T_b38	rs56803472	5.07e-16	1.05301e-09	0.0968	0.135662	T	T	5.07e-16	4.39362e-08	0.662022	2	chr1_11119427_C_T_b38;chr1_11173757_G_A_b38
	6	1	11162336	rs7553827	Dupuytren's disease	Artery_Aorta	ENSG00000226849.1	0.987024	chr1_11119427_C_T_b38	rs56803472	5.07e-16	7.8353e-11	0.0968	-0.224705	T	T	5.07e-16	1.02395e-10	0.691004	3	chr1_11119427_C_T_b38;chr1_11121270_C_T_b38;chr1_11169458_G_A_b38
	6	1	11162336	rs7553827	Dupuytren's disease	Thyroid	ENSG00000226849.1	0.985984	chr1_11119427_C_T_b38	rs56803472	5.07e-16	5.72876e-13	0.0968	-0.210264	T	T	5.07e-16	2.97754e-12	0.408459	4	chr1_11119427_C_T_b38;chr1_11121270_C_T_b38;chr1_11169458_G_A_b38;chr1_11130589_G_A_b38
	6	1	11162336	rs7553827	Dupuytren's disease	Testis	ENSG00000226849.1	0.985063	chr1_11119427_C_T_b38	rs56803472	5.07e-16	5.85106e-10	0.0968	-0.254205	T	T	5.07e-16	8.85093e-10	0.659358	4	chr1_11119427_C_T_b38;chr1_11121270_C_T_b38;chr1_11169458_G_A_b38;chr1_11130589_G_A_b38
	6	1	11162336	rs7553827	Dupuytren's disease	Artery_Tibial	ENSG00000226849.1	0.974223	chr1_11119427_C_T_b38	rs56803472	5.07e-16	3.02008e-16	0.0968	-0.226453	T	T	5.07e-16	2.56965e-15	0.505982	3	chr1_11119427_C_T_b38;chr1_11121270_C_T_b38;chr1_11130589_G_A_b38
	6	1	11162336	rs7553827	Dupuytren's disease	Skin_Not_Sun_Exposed_Suprapubic	ENSG00000226849.1	0.968836	chr1_11121270_C_T_b38	rs11121691	5.07e-16	1.4926e-11	0.0963	-0.204319	T	T	6.592e-16	7.69305e-11	0.35555	4	chr1_11121270_C_T_b38;chr1_11119427_C_T_b38;chr1_11130589_G_A_b38;chr1_11169458_G_A_b38
	6	1	11162336	rs7553827	Dupuytren's disease	Adipose_Visceral_Omentum	ENSG00000226849.1	0.965422	chr1_11121270_C_T_b38	rs11121691	5.07e-16	2.55822e-07	0.0963	-0.168443	T	T	6.592e-16	1.69675e-06	0.479185	4	chr1_11121270_C_T_b38;chr1_11119427_C_T_b38;chr1_11130589_G_A_b38;chr1_11169458_G_A_b38
	6	1	11162336	rs7553827	Dupuytren's disease	Breast_Mammary_Tissue	ENSG00000226849.1	0.959197	chr1_11119427_C_T_b38	rs56803472	5.07e-16	1.45302e-12	0.0968	-0.251829	T	T	5.07e-16	1.84501e-11	0.741752	2	chr1_11119427_C_T_b38;chr1_11121270_C_T_b38
	6	1	11162336	rs7553827	Dupuytren's disease	Colon_Transverse	ENSG00000226849.1	0.927057	chr1_11119427_C_T_b38	rs56803472	5.07e-16	2.66278e-09	0.0968	-0.241354	T	T	5.07e-16	1.82003e-08	0.748887	3	chr1_11119427_C_T_b38;chr1_11121270_C_T_b38;chr1_11176353_C_A_b38
	6	1	11162336	rs7553827	Dupuytren's disease	Muscle_Skeletal	ENSG00000226849.1	0.883939	chr1_11169458_G_A_b38	rs11121695	5.07e-16	1.43663e-16	0.0963	-0.293545	A	A	1.037e-15	2.43654e-15	0.454888	3	chr1_11169458_G_A_b38;chr1_11119427_C_T_b38;chr1_11121270_C_T_b38
	6	1	11162336	rs7553827	Dupuytren's disease	Artery_Aorta	ENSG00000271895.2	0.974826	chr1_11173757_G_A_b38	rs11585553	5.07e-16	7.21726e-07	0.0973	0.152762	A	A	1.107e-15	7.21726e-07	0.852945	3	chr1_11173757_G_A_b38;chr1_11169458_G_A_b38;chr1_11119427_C_T_b38
	6	1	11162336	rs7553827	Dupuytren's disease	Muscle_Skeletal	ENSG00000271895.2	0.947925	chr1_11044313_C_T_b38	rs3765900	6.044e-11	6.06921e-07	-0.0808	-0.120114	T	T	6.044e-11	2.07151e-06	0.581542	3	chr1_11044313_C_T_b38;chr1_11043910_G_A_b38;chr1_11039731_G_A_b38
	6	1	11162336	rs7553827	Dupuytren's disease	Thyroid	ENSG00000271895.2	0.813317	chr1_11039731_G_A_b38	rs12136468	6.044e-11	1.59982e-07	-0.0875	-0.107289	A	A	1.055e-10	3.82524e-06	0.311775	4	chr1_11039731_G_A_b38;chr1_11044619_G_A_b38;chr1_11045049_C_T_b38;chr1_11044313_C_T_b38
	7	1	15586228	rs10157011	Renal fibrosis	Uterus	CASP9	0.943731	chr1_15495090_C_T_b38	rs4233532	6.90449e-161	7.77742e-06	-0.213309	0.348442	C	T	6.90449e-161	1.06685e-05	0.388437	13	chr1_15495090_C_T_b38;chr1_15511205_A_G_b38;chr1_15522201_C_T_b38;chr1_15502731_T_C_b38;chr1_15553556_T_C_b38;chr1_15519032_A_G_b38;chr1_15547784_A_G_b38;chr1_15509528_G_A_b38;chr1_15537125_T_A_b38;chr1_15539109_A_G_b38;chr1_15494112_A_G_b38;chr1_15506048_T_C_b38;chr1_15511443_G_A_b38
	7	1	15586228	rs10157011	Renal fibrosis	Brain_Amygdala	CASP9	0.936591	chr1_15495090_C_T_b38	rs4233532	6.90449e-161	7.14045e-06	-0.213309	0.425091	C	T	6.90449e-161	1.3876e-05	0.383921	14	chr1_15495090_C_T_b38;chr1_15511205_A_G_b38;chr1_15522201_C_T_b38;chr1_15502731_T_C_b38;chr1_15519032_A_G_b38;chr1_15547784_A_G_b38;chr1_15537125_T_A_b38;chr1_15539109_A_G_b38;chr1_15494112_A_G_b38;chr1_15506048_T_C_b38;chr1_15523149_C_T_b38;chr1_15521251_A_C_b38;chr1_15526209_T_C_b38;chr1_15527155_A_G_b38
	7	1	15586228	rs10157011	Renal fibrosis	Vagina	CASP9	0.935086	chr1_15495090_C_T_b38	rs4233532	6.90449e-161	4.37307e-07	-0.213309	0.391173	C	T	6.90449e-161	2.56313e-06	0.384669	11	chr1_15495090_C_T_b38;chr1_15511205_A_G_b38;chr1_15522201_C_T_b38;chr1_15537125_T_A_b38;chr1_15539109_A_G_b38;chr1_15502731_T_C_b38;chr1_15519032_A_G_b38;chr1_15547784_A_G_b38;chr1_15553556_T_C_b38;chr1_15509528_G_A_b38;chr1_15494112_A_G_b38
	7	1	15586228	rs10157011	Renal fibrosis	Artery_Coronary	CASP9	0.875038	chr1_15495090_C_T_b38	rs4233532	6.90449e-161	2.63161e-07	-0.213309	0.306478	C	T	6.90449e-161	2.28637e-06	0.233592	25	chr1_15495090_C_T_b38;chr1_15511205_A_G_b38;chr1_15519032_A_G_b38;chr1_15509528_G_A_b38;chr1_15522201_C_T_b38;chr1_15502731_T_C_b38;chr1_15553556_T_C_b38;chr1_15547784_A_G_b38;chr1_15506048_T_C_b38;chr1_15511443_G_A_b38;chr1_15505888_G_T_b38;chr1_15512004_T_C_b38;chr1_15507413_C_T_b38;chr1_15507802_G_A_b38;chr1_15507996_G_A_b38;chr1_15508452_G_A_b38;chr1_15508641_T_C_b38;chr1_15510225_C_T_b38;chr…
	7	1	15586228	rs10157011	Renal fibrosis	Brain_Spinal_cord_cervical_c-1	CASP9	0.846479	chr1_15523988_G_A_b38	rs4645985	2.75413e-180	4.51202e-06	-0.227727	0.431548	G	A	2.75413e-180	1.87608e-05	1	1	chr1_15523988_G_A_b38
	7	1	15586228	rs10157011	Renal fibrosis	Small_Intestine_Terminal_Ileum	FHAD1	0.781168	chr1_15246306_A_G_b38	rs1612465	0.000101508	3.36015e-10	-0.0317831	-0.590649	G	G	0.000101508	3.36015e-10	0.059616	27	chr1_15246306_A_G_b38;chr1_15248397_C_CT_b38;chr1_15252840_A_G_b38;chr1_15247273_G_A_b38;chr1_15252320_C_T_b38;chr1_15252874_G_A_b38;chr1_15252519_T_C_b38;chr1_15247193_A_G_b38;chr1_15247262_G_A_b38;chr1_15250526_A_G_b38;chr1_15251144_G_A_b38;chr1_15247215_C_A_b38;chr1_15250126_C_T_b38;chr1_15249815_C_T_b38;chr1_15251618_C_T_b38;chr1_15251626_T_C_b38;chr1_15250984_A_G_b38;chr1_15250082_C_T_b38;ch…
	7	1	15586228	rs10157011	Renal fibrosis	Esophagus_Gastroesophageal_Junction	FHAD1	0.778802	chr1_15247826_C_T_b38	rs1752015	0.000101508	2.73778e-11	-0.0297663	-0.33456	T	T	0.000257517	2.73778e-11	0.0796935	27	chr1_15247826_C_T_b38;chr1_15251535_TTTGA_T_b38;chr1_15247580_C_T_b38;chr1_15250961_G_C_b38;chr1_15249316_C_T_b38;chr1_15246306_A_G_b38;chr1_15248397_C_CT_b38;chr1_15252840_A_G_b38;chr1_15247273_G_A_b38;chr1_15252320_C_T_b38;chr1_15252874_G_A_b38;chr1_15252519_T_C_b38;chr1_15247193_A_G_b38;chr1_15247262_G_A_b38;chr1_15250526_A_G_b38;chr1_15251144_G_A_b38;chr1_15247215_C_A_b38;chr1_15250126_C_T_b3…
	7	1	15586228	rs10157011	Renal fibrosis	Lung	FHAD1	0.778742	chr1_15246306_A_G_b38	rs1612465	0.000101508	1.92615e-14	-0.0317831	-0.203767	G	G	0.000101508	2.0793e-14	0.0608071	25	chr1_15246306_A_G_b38;chr1_15252840_A_G_b38;chr1_15252320_C_T_b38;chr1_15252874_G_A_b38;chr1_15252519_T_C_b38;chr1_15250526_A_G_b38;chr1_15250126_C_T_b38;chr1_15249815_C_T_b38;chr1_15251618_C_T_b38;chr1_15251626_T_C_b38;chr1_15250984_A_G_b38;chr1_15250082_C_T_b38;chr1_15250170_T_A_b38;chr1_15250287_T_C_b38;chr1_15250292_T_C_b38;chr1_15249743_C_T_b38;chr1_15250877_T_C_b38;chr1_15250624_A_G_b38;chr…
	7	1	15586228	rs10157011	Renal fibrosis	Esophagus_Muscularis	FHAD1	0.778275	chr1_15251535_TTTGA_T_b38	rs139258007	0.000101508	4.08966e-13	-0.0304115	-0.363235	T	T	0.000196814	4.08966e-13	0.0390422	27	chr1_15251535_TTTGA_T_b38;chr1_15247580_C_T_b38;chr1_15250961_G_C_b38;chr1_15249316_C_T_b38;chr1_15248397_C_CT_b38;chr1_15252840_A_G_b38;chr1_15247273_G_A_b38;chr1_15252320_C_T_b38;chr1_15252874_G_A_b38;chr1_15252519_T_C_b38;chr1_15247193_A_G_b38;chr1_15247262_G_A_b38;chr1_15250526_A_G_b38;chr1_15247215_C_A_b38;chr1_15250126_C_T_b38;chr1_15249815_C_T_b38;chr1_15251618_C_T_b38;chr1_15251626_T_C_b3…
	7	1	15586228	rs10157011	Renal fibrosis	Nerve_Tibial	FHAD1	0.776461	chr1_15246306_A_G_b38	rs1612465	0.000101508	1.34697e-14	-0.0317831	-0.373476	G	G	0.000101508	1.34697e-14	0.0653473	26	chr1_15246306_A_G_b38;chr1_15251535_TTTGA_T_b38;chr1_15248397_C_CT_b38;chr1_15252840_A_G_b38;chr1_15247273_G_A_b38;chr1_15252320_C_T_b38;chr1_15252874_G_A_b38;chr1_15252519_T_C_b38;chr1_15247193_A_G_b38;chr1_15247580_C_T_b38;chr1_15247262_G_A_b38;chr1_15250526_A_G_b38;chr1_15247215_C_A_b38;chr1_15250126_C_T_b38;chr1_15249815_C_T_b38;chr1_15251618_C_T_b38;chr1_15251626_T_C_b38;chr1_15250984_A_G_b3…
	7	1	15586228	rs10157011	Renal fibrosis	Whole_Blood	FHAD1	0.775882	chr1_15246306_A_G_b38	rs1612465	0.000101508	1.80375e-07	-0.0317831	-0.256683	G	G	0.000101508	2.46099e-07	0.0932026	26	chr1_15246306_A_G_b38;chr1_15248397_C_CT_b38;chr1_15252840_A_G_b38;chr1_15247273_G_A_b38;chr1_15252320_C_T_b38;chr1_15252874_G_A_b38;chr1_15252519_T_C_b38;chr1_15247193_A_G_b38;chr1_15247262_G_A_b38;chr1_15250526_A_G_b38;chr1_15247215_C_A_b38;chr1_15250126_C_T_b38;chr1_15249815_C_T_b38;chr1_15251618_C_T_b38;chr1_15251626_T_C_b38;chr1_15250984_A_G_b38;chr1_15250082_C_T_b38;chr1_15250170_T_A_b38;ch…
	7	1	15586228	rs10157011	Renal fibrosis	Artery_Tibial	FHAD1	0.775626	chr1_15248397_C_CT_b38	rs35333314	0.000101508	1.56825e-08	-0.030283	-0.235219	CT	CT	0.000207816	1.56825e-08	0.0500411	23	chr1_15248397_C_CT_b38;chr1_15247273_G_A_b38;chr1_15247193_A_G_b38;chr1_15247262_G_A_b38;chr1_15247215_C_A_b38;chr1_15249609_A_G_b38;chr1_15248856_A_G_b38;chr1_15248505_C_A_b38;chr1_15248790_G_A_b38;chr1_15247454_A_C_b38;chr1_15247580_C_T_b38;chr1_15249316_C_T_b38;chr1_15247826_C_T_b38;chr1_15251535_TTTGA_T_b38;chr1_15252840_A_G_b38;chr1_15252320_C_T_b38;chr1_15252874_G_A_b38;chr1_15252519_T_C_b3…
	7	1	15586228	rs10157011	Renal fibrosis	Pituitary	FHAD1	0.775169	chr1_15251535_TTTGA_T_b38	rs139258007	0.000101508	4.29544e-22	-0.0304115	-0.634733	T	T	0.000196814	4.29544e-22	0.0330986	27	chr1_15251535_TTTGA_T_b38;chr1_15248397_C_CT_b38;chr1_15252840_A_G_b38;chr1_15247273_G_A_b38;chr1_15252320_C_T_b38;chr1_15252874_G_A_b38;chr1_15252519_T_C_b38;chr1_15247193_A_G_b38;chr1_15247580_C_T_b38;chr1_15247262_G_A_b38;chr1_15250526_A_G_b38;chr1_15251144_G_A_b38;chr1_15247215_C_A_b38;chr1_15250126_C_T_b38;chr1_15249815_C_T_b38;chr1_15251618_C_T_b38;chr1_15251626_T_C_b38;chr1_15250984_A_G_b3…
	7	1	15586228	rs10157011	Renal fibrosis	Colon_Sigmoid	FHAD1	0.774652	chr1_15251535_TTTGA_T_b38	rs139258007	0.000101508	8.38994e-30	-0.0304115	-0.639687	T	T	0.000196814	8.38994e-30	0.0330051	27	chr1_15251535_TTTGA_T_b38;chr1_15248397_C_CT_b38;chr1_15252840_A_G_b38;chr1_15247273_G_A_b38;chr1_15252320_C_T_b38;chr1_15252874_G_A_b38;chr1_15252519_T_C_b38;chr1_15247193_A_G_b38;chr1_15247580_C_T_b38;chr1_15247262_G_A_b38;chr1_15250526_A_G_b38;chr1_15251144_G_A_b38;chr1_15247215_C_A_b38;chr1_15250126_C_T_b38;chr1_15249815_C_T_b38;chr1_15251618_C_T_b38;chr1_15251626_T_C_b38;chr1_15250984_A_G_b3…
	7	1	15586228	rs10157011	Renal fibrosis	Colon_Transverse	FHAD1	0.774346	chr1_15248397_C_CT_b38	rs35333314	0.000101508	9.74258e-34	-0.030283	-0.700554	CT	CT	0.000207816	9.74258e-34	0.0332564	26	chr1_15248397_C_CT_b38;chr1_15252840_A_G_b38;chr1_15247273_G_A_b38;chr1_15252320_C_T_b38;chr1_15252874_G_A_b38;chr1_15252519_T_C_b38;chr1_15247193_A_G_b38;chr1_15247262_G_A_b38;chr1_15250526_A_G_b38;chr1_15247215_C_A_b38;chr1_15250126_C_T_b38;chr1_15249815_C_T_b38;chr1_15251618_C_T_b38;chr1_15251626_T_C_b38;chr1_15250984_A_G_b38;chr1_15250082_C_T_b38;chr1_15250170_T_A_b38;chr1_15250287_T_C_b38;ch…
	7	1	15586228	rs10157011	Renal fibrosis	Stomach	FHAD1	0.773064	chr1_15251144_G_A_b38	rs1752003	0.000101508	1.43489e-23	-0.0299043	-0.562793	A	A	0.000239421	1.43489e-23	0.0376291	24	chr1_15251144_G_A_b38;chr1_15248397_C_CT_b38;chr1_15252840_A_G_b38;chr1_15247273_G_A_b38;chr1_15252320_C_T_b38;chr1_15252874_G_A_b38;chr1_15252519_T_C_b38;chr1_15247193_A_G_b38;chr1_15247262_G_A_b38;chr1_15250526_A_G_b38;chr1_15247215_C_A_b38;chr1_15250126_C_T_b38;chr1_15249815_C_T_b38;chr1_15251618_C_T_b38;chr1_15251626_T_C_b38;chr1_15250984_A_G_b38;chr1_15250082_C_T_b38;chr1_15250170_T_A_b38;ch…
	7	1	15586228	rs10157011	Renal fibrosis	Artery_Aorta	FHAD1	0.75079	chr1_15248397_C_CT_b38	rs35333314	0.000101508	8.10896e-08	-0.030283	-0.320217	CT	CT	0.000207816	1.59582e-07	0.0309876	27	chr1_15248397_C_CT_b38;chr1_15246306_A_G_b38;chr1_15252840_A_G_b38;chr1_15247273_G_A_b38;chr1_15252320_C_T_b38;chr1_15252874_G_A_b38;chr1_15252519_T_C_b38;chr1_15247193_A_G_b38;chr1_15247262_G_A_b38;chr1_15250526_A_G_b38;chr1_15247215_C_A_b38;chr1_15250126_C_T_b38;chr1_15249815_C_T_b38;chr1_15251618_C_T_b38;chr1_15251626_T_C_b38;chr1_15250984_A_G_b38;chr1_15250082_C_T_b38;chr1_15250170_T_A_b38;ch…
	7	1	15586228	rs10157011	Renal fibrosis	Testis	FHAD1	0.7064	chr1_15251535_TTTGA_T_b38	rs139258007	6.25262e-06	2.52865e-12	-0.0304115	-0.204731	T	T	0.000196814	1.02668e-11	0.033443	24	chr1_15251535_TTTGA_T_b38;chr1_15248397_C_CT_b38;chr1_15252840_A_G_b38;chr1_15247273_G_A_b38;chr1_15252320_C_T_b38;chr1_15252874_G_A_b38;chr1_15252519_T_C_b38;chr1_15247193_A_G_b38;chr1_15247580_C_T_b38;chr1_15247262_G_A_b38;chr1_15250526_A_G_b38;chr1_15247215_C_A_b38;chr1_15250126_C_T_b38;chr1_15249815_C_T_b38;chr1_15251618_C_T_b38;chr1_15251626_T_C_b38;chr1_15250984_A_G_b38;chr1_15250082_C_T_b3…
	7	1	15586228	rs10157011	Renal fibrosis	Brain_Frontal_Cortex_BA9	SPEN-AS1	0.850161	chr1_15800181_G_A_b38	rs2013745	2.36053e-05	5.2819e-07	-0.0356338	-0.336555	A	A	2.36053e-05	1.03225e-05	0.106875	16	chr1_15800181_G_A_b38;chr1_15800437_C_T_b38;chr1_15804090_T_G_b38;chr1_15801710_G_A_b38;chr1_15800985_G_C_b38;chr1_15802882_G_A_b38;chr1_15802024_T_C_b38;chr1_15814132_C_T_b38;chr1_15805677_G_A_b38;chr1_15813777_G_A_b38;chr1_15813421_G_A_b38;chr1_15815119_C_T_b38;chr1_15816465_G_T_b38;chr1_15815367_C_T_b38;chr1_15836236_C_T_b38;chr1_15848609_CT_C_b38
	7	1	15586228	rs10157011	Renal fibrosis	Heart_Left_Ventricle	CLCNKB	0.840769	chr1_15993582_C_T_b38	rs11582497	2.61971e-05	5.55325e-10	-0.0599198	-0.533534	T	T	2.61971e-05	3.12211e-09	0.671125	3	chr1_15993582_C_T_b38;chr1_15875709_C_A_b38;chr1_15952396_C_T_b38
	7	1	15586228	rs10157011	Renal fibrosis	Whole_Blood	MST1P2	0.829381	chr1_16021382_A_T_b38	rs111259117	0.000193032	1.85884e-06	-0.0922185	0.494322	T	T	0.000256786	1.85884e-06	0.0801651	23	chr1_16021382_A_T_b38;chr1_16036527_A_T_b38;chr1_16023055_G_T_b38;chr1_16052244_G_A_b38;chr1_16026078_C_T_b38;chr1_16047089_C_T_b38;chr1_16036940_G_A_b38;chr1_16042140_G_A_b38;chr1_16016656_C_CT_b38;chr1_16031238_C_T_b38;chr1_16028792_C_G_b38;chr1_16042913_T_C_b38;chr1_16005424_T_C_b38;chr1_16004628_C_A_b38;chr1_16003580_G_A_b38;chr1_16001120_G_T_b38;chr1_16002014_G_A_b38;chr1_16003121_C_T_b38;ch…
	7	1	15586228	rs10157011	Renal fibrosis	Breast_Mammary_Tissue	DDI2	0.848308	chr1_15592554_T_A_b38	rs1547034	3.90893e-132	9.35915e-06	0.217621	-0.113411	A	A	3.90893e-132	4.2412e-05	0.982675	1	chr1_15592554_T_A_b38
	7	1	15586228	rs10157011	Renal fibrosis	Lung	FHAD1-AS1	0.773387	chr1_15252840_A_G_b38	rs1752000	0.000101508	4.06812e-24	-0.02995	-0.44457	G	G	0.000232562	4.06812e-24	0.0391066	20	chr1_15252840_A_G_b38;chr1_15252320_C_T_b38;chr1_15252874_G_A_b38;chr1_15252519_T_C_b38;chr1_15250526_A_G_b38;chr1_15250126_C_T_b38;chr1_15249815_C_T_b38;chr1_15251618_C_T_b38;chr1_15251626_T_C_b38;chr1_15250984_A_G_b38;chr1_15250082_C_T_b38;chr1_15250170_T_A_b38;chr1_15250287_T_C_b38;chr1_15250292_T_C_b38;chr1_15249743_C_T_b38;chr1_15250877_T_C_b38;chr1_15250624_A_G_b38;chr1_15249746_C_G_b38;chr…
	8	1	15986677	rs3961710	Heart failure	Thyroid	SPEN	0.889708	chr1_15857061_C_A_b38	rs12121918	6.275e-11	5.29296e-08	-0.0444	0.148703	A	A	6.275e-11	1.46115e-07	0.923358	1	chr1_15857061_C_A_b38
	8	1	15986677	rs3961710	Heart failure	Pituitary	HSPB7	0.983931	chr1_16014384_T_G_b38	rs1048302	6.275e-11	6.24612e-26	0.0322	-0.75451	G	G	1.422e-10	6.24612e-26	0.905431	2	chr1_16014384_T_G_b38;chr1_16018235_T_C_b38
	8	1	15986677	rs3961710	Heart failure	Colon_Transverse	HSPB7	0.980693	chr1_16014384_T_G_b38	rs1048302	7.755e-11	9.89916e-09	0.0322	0.14706	G	G	1.422e-10	9.89916e-09	0.298989	7	chr1_16014384_T_G_b38;chr1_16018235_T_C_b38;chr1_16011979_T_C_b38;chr1_16013314_T_C_b38;chr1_16026905_T_C_b38;chr1_16031653_T_C_b38;chr1_16032437_T_C_b38
	8	1	15986677	rs3961710	Heart failure	Esophagus_Gastroesophageal_Junction	HSPB7	0.97515	chr1_16013314_T_C_b38	rs1763603	7.755e-11	3.90551e-10	0.0318	0.212284	C	C	2.679e-10	3.90551e-10	0.26237	7	chr1_16013314_T_C_b38;chr1_16011979_T_C_b38;chr1_16018235_T_C_b38;chr1_16014384_T_G_b38;chr1_16009032_G_C_b38;chr1_16004613_T_C_b38;chr1_16008649_T_C_b38
	8	1	15986677	rs3961710	Heart failure	Esophagus_Muscularis	HSPB7	0.944226	chr1_16011979_T_C_b38	rs6696912	7.755e-11	1.81184e-13	0.0321	0.160518	C	C	1.589e-10	2.2625e-13	0.282761	10	chr1_16011979_T_C_b38;chr1_16018235_T_C_b38;chr1_16013314_T_C_b38;chr1_16014384_T_G_b38;chr1_16017907_G_A_b38;chr1_16015238_T_C_b38;chr1_16016353_T_G_b38;chr1_16026905_T_C_b38;chr1_16016759_T_C_b38;chr1_16014266_T_C_b38
	8	1	15986677	rs3961710	Heart failure	Adrenal_Gland	HSPB7	0.940041	chr1_16009032_G_C_b38	rs1763610	6.275e-11	1.20466e-08	0.0322	0.247606	C	C	8.162e-11	3.03105e-08	0.198766	11	chr1_16009032_G_C_b38;chr1_16004613_T_C_b38;chr1_16008649_T_C_b38;chr1_15980351_G_A_b38;chr1_16014384_T_G_b38;chr1_16021917_T_C_b38;chr1_16026905_T_C_b38;chr1_16018235_T_C_b38;chr1_15977903_G_A_b38;chr1_15978784_T_C_b38;chr1_16013314_T_C_b38
	8	1	15986677	rs3961710	Heart failure	Artery_Aorta	HSPB7	0.931062	chr1_15861130_G_A_b38	rs12023422	1.437e-10	5.86463e-11	0.0386	-0.19378	A	A	1.437e-10	1.37109e-09	0.987547	1	chr1_15861130_G_A_b38
	8	1	15986677	rs3961710	Heart failure	Muscle_Skeletal	HSPB7	0.854869	chr1_16017999_G_A_b38	rs1572381	7.755e-11	4.32176e-15	0.0287	0.163607	A	A	1.217e-09	4.72855e-15	0.279451	5	chr1_16017999_G_A_b38;chr1_16018898_T_C_b38;chr1_16017907_G_A_b38;chr1_16018713_G_A_b38;chr1_16015238_T_C_b38
	8	1	15986677	rs3961710	Heart failure	Thyroid	HSPB7	0.750802	chr1_16018713_G_A_b38	rs945420	6.275e-11	1.34152e-76	0.0286	-0.58209	A	A	2.718e-09	1.34152e-76	0.977679	1	chr1_16018713_G_A_b38
	8	1	15986677	rs3961710	Heart failure	Lung	ENSG00000178715.8	0.92617	chr1_15980351_G_A_b38	rs3979179	6.275e-11	8.84866e-07	-0.0325	-0.284766	A	A	1.134e-10	1.47966e-06	0.598342	6	chr1_15980351_G_A_b38;chr1_15993533_G_A_b38;chr1_15977903_G_A_b38;chr1_15978784_T_C_b38;chr1_16018235_T_C_b38;chr1_16009032_G_C_b38
	8	1	15986677	rs3961710	Heart failure	Skin_Not_Sun_Exposed_Suprapubic	ENSG00000178715.8	0.887045	chr1_15980351_G_A_b38	rs3979179	6.275e-11	4.71856e-09	-0.0325	-0.299448	A	A	1.134e-10	1.20229e-07	0.673742	3	chr1_15980351_G_A_b38;chr1_15818360_G_C_b38;chr1_15817284_G_A_b38
	8	1	15986677	rs3961710	Heart failure	Brain_Cerebellar_Hemisphere	ENSG00000178715.8	0.704525	chr1_15857061_C_A_b38	rs12121918	6.275e-11	1.30806e-07	-0.0444	-0.523314	A	A	6.275e-11	1.09609e-05	0.553863	2	chr1_15857061_C_A_b38;chr1_15980351_G_A_b38
	8	1	15986677	rs3961710	Heart failure	Brain_Cerebellar_Hemisphere	CLCNKB	0.921895	chr1_16078625_G_C_b38	rs4075295	5.222e-06	1.59704e-08	0.0235	-0.567099	C	C	5.222e-06	1.92767e-08	0.885811	1	chr1_16078625_G_C_b38
	8	1	15986677	rs3961710	Heart failure	Adipose_Subcutaneous	CLCNKB	0.878375	chr1_16018898_T_C_b38	rs945421	7.755e-11	1.11783e-06	0.0291	0.213673	C	C	1.535e-09	1.12754e-06	0.101845	16	chr1_16018898_T_C_b38;chr1_16018235_T_C_b38;chr1_16019124_T_C_b38;chr1_16017999_G_A_b38;chr1_16018713_G_A_b38;chr1_16017907_G_A_b38;chr1_16014384_T_G_b38;chr1_16011979_T_C_b38;chr1_16015238_T_C_b38;chr1_16016353_T_G_b38;chr1_16009032_G_C_b38;chr1_16026905_T_C_b38;chr1_16004613_T_C_b38;chr1_16013314_T_C_b38;chr1_16016759_T_C_b38;chr1_16008649_T_C_b38
	8	1	15986677	rs3961710	Heart failure	Skin_Sun_Exposed_Lower_leg	CLCNKB	0.865882	chr1_16018235_T_C_b38	rs945418	7.755e-11	2.07797e-06	0.0326	0.166483	C	C	7.755e-11	9.23295e-05	0.273774	6	chr1_16018235_T_C_b38;chr1_16031653_T_C_b38;chr1_16032437_T_C_b38;chr1_16026905_T_C_b38;chr1_16011979_T_C_b38;chr1_16013314_T_C_b38
	8	1	15986677	rs3961710	Heart failure	Brain_Cerebellum	FAM131C	0.967645	chr1_16018898_T_C_b38	rs945421	1.147e-09	3.55062e-08	0.0291	0.349793	C	C	1.535e-09	1.48587e-07	0.238333	10	chr1_16018898_T_C_b38;chr1_16019124_T_C_b38;chr1_16018713_G_A_b38;chr1_16030006_G_A_b38;chr1_16017907_G_A_b38;chr1_16017999_G_A_b38;chr1_16011014_G_A_b38;chr1_16015238_T_C_b38;chr1_16016353_T_G_b38;chr1_16016759_T_C_b38
	8	1	15986677	rs3961710	Heart failure	Adipose_Subcutaneous	FAM131C	0.947323	chr1_15857061_C_A_b38	rs12121918	6.275e-11	5.53949e-07	-0.0444	-0.222369	A	A	6.275e-11	5.77907e-06	0.971504	1	chr1_15857061_C_A_b38
	8	1	15986677	rs3961710	Heart failure	Brain_Frontal_Cortex_BA9	FAM131C	0.852435	chr1_16078625_G_C_b38	rs4075295	5.222e-06	1.91858e-07	0.0235	-0.368034	C	C	5.222e-06	6.41042e-07	0.875263	1	chr1_16078625_G_C_b38
	8	1	15986677	rs3961710	Heart failure	Spleen	CLCNKA	0.964563	chr1_16019124_T_C_b38	rs945422	1.437e-10	3.02322e-10	0.0293	-0.481152	C	C	1.169e-09	4.38937e-09	0.206955	10	chr1_16019124_T_C_b38;chr1_16011014_G_A_b38;chr1_16017907_G_A_b38;chr1_16015238_T_C_b38;chr1_16016353_T_G_b38;chr1_16017999_G_A_b38;chr1_16016759_T_C_b38;chr1_16018898_T_C_b38;chr1_16014266_T_C_b38;chr1_16016827_T_C_b38
	8	1	15986677	rs3961710	Heart failure	Brain_Substantia_nigra	CLCNKA	0.946637	chr1_16014384_T_G_b38	rs1048302	6.275e-11	1.87477e-11	0.0322	-0.858173	G	G	1.422e-10	1.87477e-11	0.373276	11	chr1_16014384_T_G_b38;chr1_15980351_G_A_b38;chr1_16009032_G_C_b38;chr1_16004613_T_C_b38;chr1_16008649_T_C_b38;chr1_16017907_G_A_b38;chr1_16017999_G_A_b38;chr1_16015238_T_C_b38;chr1_16016353_T_G_b38;chr1_16016759_T_C_b38;chr1_16014266_T_C_b38
	8	1	15986677	rs3961710	Heart failure	Pancreas	CLCNKA	0.915115	chr1_15857061_C_A_b38	rs12121918	6.275e-11	7.74549e-09	-0.0444	-0.344656	A	A	6.275e-11	6.42733e-07	0.975777	1	chr1_15857061_C_A_b38
	8	1	15986677	rs3961710	Heart failure	Esophagus_Mucosa	CLCNKA	0.912377	chr1_15861130_G_A_b38	rs12023422	7.755e-11	3.71317e-06	0.0386	-0.22421	A	A	1.437e-10	1.66733e-05	0.266572	13	chr1_15861130_G_A_b38;chr1_16017999_G_A_b38;chr1_16017907_G_A_b38;chr1_16018235_T_C_b38;chr1_16026905_T_C_b38;chr1_16015238_T_C_b38;chr1_16016353_T_G_b38;chr1_16014384_T_G_b38;chr1_16019124_T_C_b38;chr1_16018898_T_C_b38;chr1_16014266_T_C_b38;chr1_16016759_T_C_b38;chr1_16031653_T_C_b38
	8	1	15986677	rs3961710	Heart failure	Stomach	CLCNKA	0.86592	chr1_16016759_T_C_b38	rs1739843	7.755e-11	3.97319e-14	0.0284	-0.258892	C	C	1.914e-09	3.97319e-14	0.344343	5	chr1_16016759_T_C_b38;chr1_16015238_T_C_b38;chr1_16016353_T_G_b38;chr1_16017907_G_A_b38;chr1_16017999_G_A_b38
	8	1	15986677	rs3961710	Heart failure	Brain_Spinal_cord_cervical_c-1	CLCNKA	0.865399	chr1_16017907_G_A_b38	rs945416	7.755e-11	5.95089e-18	0.0288	-0.78069	A	A	1.147e-09	5.95089e-18	0.203586	6	chr1_16017907_G_A_b38;chr1_16017999_G_A_b38;chr1_16015238_T_C_b38;chr1_16016353_T_G_b38;chr1_16016759_T_C_b38;chr1_16014266_T_C_b38
	8	1	15986677	rs3961710	Heart failure	Esophagus_Gastroesophageal_Junction	CLCNKA	0.858093	chr1_16017907_G_A_b38	rs945416	7.755e-11	4.50296e-09	0.0288	-0.262249	A	A	1.147e-09	1.79727e-08	0.221202	7	chr1_16017907_G_A_b38;chr1_16017999_G_A_b38;chr1_16015238_T_C_b38;chr1_16016353_T_G_b38;chr1_16016759_T_C_b38;chr1_16014266_T_C_b38;chr1_16016827_T_C_b38
	8	1	15986677	rs3961710	Heart failure	Nerve_Tibial	CLCNKA	0.855013	chr1_16017907_G_A_b38	rs945416	6.275e-11	4.5847e-34	0.0288	-0.578432	A	A	1.147e-09	4.5847e-34	0.464421	4	chr1_16017907_G_A_b38;chr1_16017999_G_A_b38;chr1_16015238_T_C_b38;chr1_16016353_T_G_b38
	8	1	15986677	rs3961710	Heart failure	Thyroid	CLCNKA	0.83868	chr1_16017907_G_A_b38	rs945416	6.275e-11	1.57313e-43	0.0288	-0.414024	A	A	1.147e-09	2.12872e-43	0.268769	4	chr1_16017907_G_A_b38;chr1_16017999_G_A_b38;chr1_16011014_G_A_b38;chr1_16015238_T_C_b38
	8	1	15986677	rs3961710	Heart failure	Brain_Putamen_basal_ganglia	CLCNKA	0.829571	chr1_16018898_T_C_b38	rs945421	6.275e-11	7.70157e-16	0.0291	-0.708181	C	C	1.535e-09	7.70157e-16	0.162762	6	chr1_16018898_T_C_b38;chr1_16017907_G_A_b38;chr1_16017999_G_A_b38;chr1_16015238_T_C_b38;chr1_16016353_T_G_b38;chr1_16016759_T_C_b38
	8	1	15986677	rs3961710	Heart failure	Esophagus_Muscularis	CLCNKA	0.827167	chr1_16017999_G_A_b38	rs1572381	6.275e-11	4.07331e-14	0.0287	-0.272795	A	A	1.217e-09	4.07331e-14	0.230238	5	chr1_16017999_G_A_b38;chr1_16017907_G_A_b38;chr1_16015238_T_C_b38;chr1_16016353_T_G_b38;chr1_16014266_T_C_b38
	8	1	15986677	rs3961710	Heart failure	Pituitary	CLCNKA	0.826074	chr1_16017907_G_A_b38	rs945416	6.275e-11	6.96893e-22	0.0288	-0.423069	A	A	1.147e-09	6.96893e-22	0.189352	6	chr1_16017907_G_A_b38;chr1_16017999_G_A_b38;chr1_16015238_T_C_b38;chr1_16016353_T_G_b38;chr1_16016759_T_C_b38;chr1_16014266_T_C_b38
	8	1	15986677	rs3961710	Heart failure	Cells_Cultured_fibroblasts	CLCNKA	0.825893	chr1_16019124_T_C_b38	rs945422	6.275e-11	1.65438e-14	0.0293	-0.387702	C	C	1.169e-09	1.65438e-14	0.48797	5	chr1_16019124_T_C_b38;chr1_16015238_T_C_b38;chr1_16016353_T_G_b38;chr1_16014266_T_C_b38;chr1_16016759_T_C_b38
	8	1	15986677	rs3961710	Heart failure	Brain_Nucleus_accumbens_basal_ganglia	CLCNKA	0.82327	chr1_16015238_T_C_b38	rs1048237	6.275e-11	3.74497e-16	0.0286	-0.602679	C	C	1.504e-09	3.74497e-16	0.187014	6	chr1_16015238_T_C_b38;chr1_16016353_T_G_b38;chr1_16016759_T_C_b38;chr1_16017907_G_A_b38;chr1_16014266_T_C_b38;chr1_16017999_G_A_b38
	8	1	15986677	rs3961710	Heart failure	Colon_Transverse	CLCNKA	0.807046	chr1_16015238_T_C_b38	rs1048237	6.275e-11	2.81324e-29	0.0286	0.735356	C	C	1.504e-09	2.81324e-29	0.243455	4	chr1_16015238_T_C_b38;chr1_16016353_T_G_b38;chr1_16016759_T_C_b38;chr1_16014266_T_C_b38
	8	1	15986677	rs3961710	Heart failure	Brain_Anterior_cingulate_cortex_BA24	CLCNKA	0.766094	chr1_16018898_T_C_b38	rs945421	6.275e-11	4.067e-15	0.0291	-0.718776	C	C	1.535e-09	4.44022e-15	0.315599	6	chr1_16018898_T_C_b38;chr1_16018713_G_A_b38;chr1_16017907_G_A_b38;chr1_16017999_G_A_b38;chr1_16015238_T_C_b38;chr1_16016353_T_G_b38
	8	1	15986677	rs3961710	Heart failure	Skin_Sun_Exposed_Lower_leg	CLCNKA	0.76205	chr1_16012924_G_C_b38	rs12404144	6.275e-11	3.69888e-19	-0.0344	-0.291572	C	C	2.422e-09	3.69888e-19	1	1	chr1_16012924_G_C_b38
	8	1	15986677	rs3961710	Heart failure	Heart_Atrial_Appendage	CLCNKA	0.758668	chr1_16020429_G_A_b38	rs2009594	1.437e-10	1.61443e-14	0.0272	-0.421449	A	A	1.126e-08	1.61443e-14	0.621119	2	chr1_16020429_G_A_b38;chr1_16018169_G_A_b38
	8	1	15986677	rs3961710	Heart failure	Testis	CLCNKA	0.731193	chr1_16020429_G_A_b38	rs2009594	1.437e-10	1.44303e-12	0.0272	-0.254988	A	A	1.126e-08	1.44303e-12	0.332849	3	chr1_16020429_G_A_b38;chr1_16017588_T_C_b38;chr1_16018169_G_A_b38
	8	1	15986677	rs3961710	Heart failure	Skin_Not_Sun_Exposed_Suprapubic	CLCNKA	0.730693	chr1_16012924_G_C_b38	rs12404144	6.275e-11	2.60408e-19	-0.0344	-0.29304	C	C	2.422e-09	2.60408e-19	0.999938	1	chr1_16012924_G_C_b38
	8	1	15986677	rs3961710	Heart failure	Testis	UQCRHL	0.940054	chr1_15981952_T_C_b38	rs848309	1.147e-09	1.95583e-08	0.0285	-0.323959	C	C	1.532e-08	1.96512e-08	0.303568	8	chr1_15981952_T_C_b38;chr1_16017907_G_A_b38;chr1_16017999_G_A_b38;chr1_16015238_T_C_b38;chr1_16016353_T_G_b38;chr1_16016759_T_C_b38;chr1_16014266_T_C_b38;chr1_16016827_T_C_b38
	8	1	15986677	rs3961710	Heart failure	Cells_Cultured_fibroblasts	ENSG00000261135.1	0.970822	chr1_15815140_G_C_b38	rs10927858	8.428e-08	5.34048e-06	-0.0266	0.254005	C	C	8.428e-08	2.01817e-05	0.638162	3	chr1_15815140_G_C_b38;chr1_15811564_T_A_b38;chr1_15802825_T_C_b38
	9	1	19845021	rs10737481	Inflammatory bowel disease	Brain_Cerebellar_Hemisphere	PLA2G5	0.983912	chr1_20048561_G_A_b38	rs12402129	1.653e-08	3.40397e-10	0.0535	0.518882	A	A	1.647e-07	3.40397e-10	0.189651	9	chr1_20048561_G_A_b38;chr1_20081688_G_T_b38;chr1_20058291_G_T_b38;chr1_20054190_C_T_b38;chr1_20042239_G_C_b38;chr1_20061115_C_T_b38;chr1_20077562_G_A_b38;chr1_20041760_C_T_b38;chr1_20069922_G_A_b38
	9	1	19845021	rs10737481	Inflammatory bowel disease	Brain_Cerebellum	PLA2G5	0.744851	chr1_20048561_G_A_b38	rs12402129	4.911e-10	1.61456e-13	0.0535	0.556749	A	A	1.647e-07	1.61456e-13	0.325506	5	chr1_20048561_G_A_b38;chr1_20058291_G_T_b38;chr1_20054190_C_T_b38;chr1_20042239_G_C_b38;chr1_20061115_C_T_b38
	9	1	19845021	rs10737481	Inflammatory bowel disease	Adrenal_Gland	TMCO4	0.918298	chr1_19901230_G_C_b38	rs4654925	3.126e-44	2.68063e-06	-0.1113	-0.276211	C	C	3.126e-44	2.56532e-05	0.983645	1	chr1_19901230_G_C_b38
	10	1	22133261	rs4655025	Carpal tunnel syndrome	Muscle_Skeletal	CDC42	0.932019	chr1_22026998_C_T_b38	rs2473303	3.29e-12	1.77559e-18	0.0435	-0.200912	T	T	4.16e-10	1.77559e-18	0.407539	4	chr1_22026998_C_T_b38;chr1_22104599_T_C_b38;chr1_22117394_G_T_b38;chr1_22122832_G_A_b38
	10	1	22133261	rs4655025	Carpal tunnel syndrome	Pancreas	LINC00339	0.873019	chr1_22026998_C_T_b38	rs2473303	3.29e-12	4.27268e-16	0.0435	0.473018	T	T	4.16e-10	4.27268e-16	0.978078	1	chr1_22026998_C_T_b38
	11	1	22371954	rs7524102	Inflammatory bowel disease	Skin_Not_Sun_Exposed_Suprapubic	WNT4	0.924573	chr1_22252126_G_A_b38	rs2744758	1.855e-05	4.5574e-13	-0.0651	-0.260048	A	A	4.188e-05	4.5574e-13	0.322348	5	chr1_22252126_G_A_b38;chr1_22257162_G_A_b38;chr1_22258225_C_T_b38;chr1_22249974_T_A_b38;chr1_22249834_G_C_b38
	13	1	41972525	rs591088	Heart failure	Brain_Nucleus_accumbens_basal_ganglia	C1orf50	0.767115	chr1_42449856_C_A_b38	rs12142723	3.154e-05	9.3028e-16	0.0207	-0.463321	A	A	0.0001641	9.3028e-16	0.709064	2	chr1_42449856_C_A_b38;chr1_42422961_AG_A_b38
	13	1	41972525	rs591088	Heart failure	Brain_Cerebellum	C1orf50	0.716871	chr1_42422961_AG_A_b38	rs71649751	0.0001641	3.66282e-17	0.0299	-0.641483	A	A	0.0002023	3.66282e-17	0.539857	2	chr1_42422961_AG_A_b38;chr1_42449856_C_A_b38
	13	1	41972525	rs591088	Heart failure	Skin_Not_Sun_Exposed_Suprapubic	RIMKLA	0.991238	chr1_42393630_AAAT_A_b38	rs5773772	6.825e-07	5.73642e-08	0.0381	0.227451	A	A	6.825e-07	5.73642e-08	0.997607	1	chr1_42393630_AAAT_A_b38
	13	1	41972525	rs591088	Heart failure	Esophagus_Mucosa	RIMKLA	0.957609	chr1_42393630_AAAT_A_b38	rs5773772	6.825e-07	1.19651e-13	0.0381	0.310596	A	A	6.825e-07	5.46961e-13	0.985801	1	chr1_42393630_AAAT_A_b38
	13	1	41972525	rs591088	Heart failure	Esophagus_Muscularis	RIMKLA	0.885794	chr1_42393630_AAAT_A_b38	rs5773772	6.825e-07	9.79786e-09	0.0381	0.167931	A	A	6.825e-07	1.02931e-07	0.998254	1	chr1_42393630_AAAT_A_b38
	13	1	41972525	rs591088	Heart failure	Adipose_Subcutaneous	SVBP	0.753082	chr1_42422961_AG_A_b38	rs71649751	3.154e-05	3.91107e-13	0.0299	0.243527	A	A	0.0002023	3.91107e-13	0.593031	2	chr1_42422961_AG_A_b38;chr1_42449856_C_A_b38
	13	1	41972525	rs591088	Heart failure	Esophagus_Gastroesophageal_Junction	SVBP	0.719862	chr1_42422961_AG_A_b38	rs71649751	3.154e-05	1.50648e-09	0.0299	0.314181	A	A	0.0002023	1.50648e-09	0.515097	2	chr1_42422961_AG_A_b38;chr1_42449856_C_A_b38
	13	1	41972525	rs591088	Heart failure	Artery_Tibial	SVBP	0.706698	chr1_42449856_C_A_b38	rs12142723	3.154e-05	9.95757e-18	0.0207	0.29438	A	A	0.0001641	9.95757e-18	0.55952	2	chr1_42449856_C_A_b38;chr1_42422961_AG_A_b38
	13	1	41972525	rs591088	Heart failure	Cells_Cultured_fibroblasts	SVBP	0.7037	chr1_42449856_C_A_b38	rs12142723	0.0001641	3.43028e-13	0.0207	0.221183	A	A	0.0001641	3.43028e-13	0.654411	2	chr1_42449856_C_A_b38;chr1_42422961_AG_A_b38
	15	1	50883991	rs149288352	Heart failure	Whole_Blood	TXNDC12	0.820553	chr1_51354163_G_A_b38	rs79431474	2.478e-08	7.05969e-10	0.0739	-0.461999	A	A	6.625e-07	7.05969e-10	0.838649	1	chr1_51354163_G_A_b38
	16	1	55257768	rs2802861	Chronic kidney disease	Adipose_Visceral_Omentum	USP24	0.84572	chr1_55233350_G_A_b38	rs10788998	6.167e-07	2.16806e-08	0.0232	0.144782	A	A	1.804e-05	2.16806e-08	0.162328	10	chr1_55233350_G_A_b38;chr1_55242911_C_T_b38;chr1_55241366_C_T_b38;chr1_55233329_G_T_b38;chr1_55237445_G_A_b38;chr1_55228820_C_T_b38;chr1_55210626_G_T_b38;chr1_55242301_C_T_b38;chr1_55219696_G_C_b38;chr1_55219712_C_T_b38
	16	1	55257768	rs2802861	Chronic kidney disease	Spleen	USP24	0.763911	chr1_55228775_C_T_b38	rs1846212	2.251e-06	6.44341e-08	0.0225	0.215684	T	T	3.45e-05	6.44341e-08	0.665493	3	chr1_55228775_C_T_b38;chr1_55233350_G_A_b38;chr1_55233329_G_T_b38
	16	1	55257768	rs2802861	Chronic kidney disease	Esophagus_Mucosa	USP24	0.732565	chr1_55253035_C_A_b38	rs17413465	3.19e-12	4.62504e-07	-0.0455	-0.143806	A	A	3.19e-12	1.3294e-05	0.999959	1	chr1_55253035_C_A_b38
	16	1	55257768	rs2802861	Chronic kidney disease	Esophagus_Muscularis	PCSK9	0.967226	chr1_55242199_C_T_b38	rs111369934	6.167e-07	5.97076e-06	-0.0342	-0.314003	T	T	6.167e-07	6.15254e-06	0.552934	4	chr1_55242199_C_T_b38;chr1_55231520_G_A_b38;chr1_55221754_C_A_b38;chr1_55214518_G_T_b38
	19	1	67242007	rs11581607	Inflammatory bowel disease	Colon_Transverse	MIER1	0.829114	chr1_66951951_C_T_b38	rs7555264	1.009e-16	1.40221e-06	-0.1755	0.223634	T	T	1.009e-16	5.72682e-05	0.222991	8	chr1_66951951_C_T_b38;chr1_66992780_G_A_b38;chr1_66975113_C_T_b38;chr1_66951872_G_T_b38;chr1_66956324_G_T_b38;chr1_66991118_C_T_b38;chr1_67003911_C_T_b38;chr1_66951256_G_A_b38
[truncated: 8,749 more rows]

[truncated: 4 more sheets: S10 - Coding variants, S11 - Genetic correlation, S12 - Pathway enrichment, S13 - Consequence exonic]
